# Supplementary material for: Pilot investigation of the rhizosphere microbial communities and metabolism of two cultivars of Polygonatum cyrtonema Hua
Source: Front Microbiol. 2025 Jul 23;16:1615900. doi: 10.3389/fmicb.2025.1615900 (PMC12325395; doi:10.3389/fmicb.2025.1615900)
Supplement: Supplementary file 3 [file Table_1.XLSX]

## Sheet: Table S1
Table S1 Differential bacteria enriched in JH1 and JH2 cultivars
id	JH1_1	JH1_2	JH1_3	JH1_4	JH1_5	JH2_1	JH2_2	JH2_3	JH2_4	JH2_5	JH1_1_CPM	JH1_2_CPM	JH1_3_CPM	JH1_4_CPM	JH1_5_CPM	JH2_1_CPM	JH2_2_CPM	JH2_3_CPM	JH2_4_CPM	JH2_5_CPM	JH1_mean	JH2_mean	log2(fc)	PValue	FDR	taxonomy
ASV1	0	0	782	130	0	0	0	0	0	0	0	0	32984.7	6024.65	0	0	0	0	0	0	7801.86	0.001	-22.8954	7.20623e-198	3.61868e-193	d__Bacteria;p__Bacteroidetes;c__Sphingobacteriia;o__Sphingobacteriales;f__Sphingobacteriaceae;g__Mucilaginibacter;s__Mucilaginibacter kameinonensis
ASV10	0	0	0	0	0	93	0	296	0	69	0	0	0	0	0	5159.21	0	68376.1	0	3086.83	0.001	15324.4	23.8693	1.54194e-72	5.162e-69	d__Bacteria;p__Proteobacteria;c__Alphaproteobacteria;o__Hyphomicrobiales;f__Bradyrhizobiaceae;g__Bradyrhizobium;s__Bradyrhizobium viridifuturi
ASV100	0	0	0	0	0	27	0	0	0	49	0	0	0	0	0	1497.84	0	0	0	2192.1	0.001	737.988	19.4932	3.4685e-21	1.74174e-18	d__Bacteria;p__Proteobacteria;c__Betaproteobacteria;o__Burkholderiales;f__Burkholderiaceae;g__Paraburkholderia;s__Paraburkholderia hospita
ASV1000	0	0	0	18	0	0	0	0	0	0	0	0	0	834.18	0	0	0	0	0	0	166.836	0.001	-17.3481	3.82122e-06	0.000205887	d__Bacteria;p__Proteobacteria;c__Alphaproteobacteria;o__Hyphomicrobiales;f__Methylocystaceae;g__Methylocystis;s__Methylocystis heyeri
ASV10000	0	0	0	4	0	0	0	0	0	0	0	0	0	185.37	0	0	0	0	0	0	37.074	0.001	-15.1781	0.0625063	0.332325	d__Bacteria;p__Planctomycetes;c__Planctomycetia;o__Isosphaerales;f__Isosphaeraceae;g__Aquisphaera;s__Aquisphaera giovannonii
ASV10001	0	0	0	0	0	0	4	0	0	0	0	0	0	0	0	0	169.03	0	0	0	0.001	33.806	15.045	0.125007	0.349364	d__Bacteria;p__Planctomycetes;c__Planctomycetia;o__Gemmatales;f__Gemmataceae;g__Fimbriiglobus;s__Fimbriiglobus ruber
ASV10002	0	0	0	0	0	0	4	0	0	0	0	0	0	0	0	0	169.03	0	0	0	0.001	33.806	15.045	0.125007	0.349364	d__Bacteria;p__Planctomycetes;c__Planctomycetia;o__Isosphaerales;f__Isosphaeraceae;g__Singulisphaera;s__Singulisphaera sp900129635
ASV10003	0	0	0	0	4	0	0	0	0	0	0	0	0	0	190.97	0	0	0	0	0	38.194	0.001	-15.2211	0.00781469	0.0892477	d__Bacteria;p__Bacteroidetes;c__Chitinophagia;o__Chitinophagales;f__Chitinophagaceae;g__Hydrotalea;s__Hydrotalea flava
ASV10004	4	0	0	0	0	0	0	0	0	0	177.19	0	0	0	0	0	0	0	0	0	35.438	0.001	-15.113	0.125007	0.349364	d__Bacteria;p__Proteobacteria;c__Gammaproteobacteria;o__Legionellales;f__Coxiellaceae;g__Coxiella;s__Coxiella burnetii
ASV10005	0	0	0	0	0	4	0	0	0	0	0	0	0	0	0	221.9	0	0	0	0	0.001	44.38	15.4376	0.0625063	0.332325	d__Bacteria;p__Planctomycetes;c__Phycisphaerae;o__Sedimentisphaerales;f__Anaerohalosphaeraceae;g__Anaerohalosphaera;s__Anaerohalosphaera lusitana
ASV10006	0	0	0	0	0	4	0	0	0	0	0	0	0	0	0	221.9	0	0	0	0	0.001	44.38	15.4376	0.0625063	0.332325	d__Bacteria;p__Planctomycetes;c__Planctomycetia;o__Pirellulales;f__Pirellulaceae;g__Rhodopirellula;s__uncultured planctomycete
ASV10007	0	0	0	0	0	0	4	0	0	0	0	0	0	0	0	0	169.03	0	0	0	0.001	33.806	15.045	0.125007	0.349364	d__Bacteria;p__Proteobacteria;c__Deltaproteobacteria;o__Myxococcales;f__Anaeromyxobacteraceae;g__Anaeromyxobacter;s__Anaeromyxobacter sp000017505
ASV10008	0	0	0	0	0	0	4	0	0	0	0	0	0	0	0	0	169.03	0	0	0	0.001	33.806	15.045	0.125007	0.349364	d__Bacteria;p__Acidobacteria;c__Acidobacteriia;o__Acidobacteriales;f__Acidobacteriaceae;g__Candidatus Koribacter;s__uncultured Acidobacteria bacterium
ASV10009	0	0	0	0	0	0	0	0	4	0	0	0	0	0	0	0	0	0	185.43	0	0.001	37.086	15.1786	0.0625063	0.332325	d__Bacteria;p__Proteobacteria;c__Alphaproteobacteria;o__Hyphomicrobiales;f__Methylocystaceae;g__Methylocystis;s__Methylocystis sp000188155
ASV1001	0	0	0	0	0	18	0	0	0	0	0	0	0	0	0	998.56	0	0	0	0	0.001	199.712	17.6076	9.55679e-07	6.34793e-05	Unclassified
ASV10010	0	0	0	0	0	0	4	0	0	0	0	0	0	0	0	0	169.03	0	0	0	0.001	33.806	15.045	0.125007	0.349364	d__Bacteria;p__Firmicutes;c__Clostridia;o__Thermoanaerobacterales;f__Thermoanaerobacteraceae;g__Thermoanaerobacter;s__Thermoanaerobacter thermocopriae
ASV10011	0	0	0	0	4	0	0	0	0	0	0	0	0	0	190.97	0	0	0	0	0	38.194	0.001	-15.2211	0.00781469	0.0892477	d__Bacteria;p__Chloroflexi;c__Thermomicrobia;o__Sphaerobacterales;f__Sphaerobacteraceae;g__Sphaerobacter;s__Sphaerobacter thermophilus
ASV10012	0	0	0	0	0	0	4	0	0	0	0	0	0	0	0	0	169.03	0	0	0	0.001	33.806	15.045	0.125007	0.349364	d__Bacteria;p__Planctomycetes;c__Planctomycetia;o__Isosphaerales;f__Isosphaeraceae;g__Singulisphaera;s__Singulisphaera sp900129635
ASV10013	0	4	0	0	0	0	0	0	0	0	0	180.35	0	0	0	0	0	0	0	0	36.07	0.001	-15.1385	0.125007	0.349364	d__Bacteria;p__Acidobacteria;c__Acidobacteriia;o__Acidobacteriales;f__Acidobacteriaceae;g__Candidatus Koribacter;s__uncultured bacterium
ASV10014	0	0	0	0	0	0	4	0	0	0	0	0	0	0	0	0	169.03	0	0	0	0.001	33.806	15.045	0.125007	0.349364	d__Bacteria;p__Proteobacteria;c__Alphaproteobacteria;o__Micropepsales;f__Micropepsaceae;g__Rhizomicrobium;s__Rhizomicrobium sp013149165
ASV10015	0	0	0	0	4	0	0	0	0	0	0	0	0	0	190.97	0	0	0	0	0	38.194	0.001	-15.2211	0.00781469	0.0892477	d__Bacteria;p__Proteobacteria;c__Deltaproteobacteria;o__Myxococcales;f__Sandaracinaceae;g__Sandaracinus;s__Sandaracinus amylolyticus
ASV10016	0	4	0	0	0	0	0	0	0	0	0	180.35	0	0	0	0	0	0	0	0	36.07	0.001	-15.1385	0.125007	0.349364	d__Bacteria;p__Proteobacteria;c__Betaproteobacteria
ASV10017	0	4	0	0	0	0	0	0	0	0	0	180.35	0	0	0	0	0	0	0	0	36.07	0.001	-15.1385	0.125007	0.349364	d__Bacteria;p__Bacteroidetes;c__Flavobacteriia;o__Flavobacteriales;f__Flavobacteriaceae;g__Flavobacterium;s__Flavobacterium sp000813005
ASV10018	0	0	0	0	0	0	4	0	0	0	0	0	0	0	0	0	169.03	0	0	0	0.001	33.806	15.045	0.125007	0.349364	d__Bacteria;p__Acidobacteria;c__Acidobacteriia;o__Bryobacterales;f__Solibacteraceae;g__Candidatus Solibacter;s__Solibacter usitatus
ASV10019	0	0	0	0	0	0	4	0	0	0	0	0	0	0	0	0	169.03	0	0	0	0.001	33.806	15.045	0.125007	0.349364	d__Bacteria;p__Planctomycetes;c__Phycisphaerae;o__Sedimentisphaerales;f__Anaerohalosphaeraceae;g__Anaerohalosphaera;s__Anaerohalosphaera lusitana
ASV1002	0	0	0	18	0	0	0	0	0	0	0	0	0	834.18	0	0	0	0	0	0	166.836	0.001	-17.3481	3.82122e-06	0.000205887	d__Bacteria;p__Acidobacteria;c__Acidobacteriia;o__Bryobacterales;f__Solibacteraceae;g__Candidatus Solibacter;s__Solibacter usitatus
ASV10020	0	0	4	0	0	0	0	0	0	0	0	0	168.72	0	0	0	0	0	0	0	33.744	0.001	-15.0423	0.250007	0.441558	d__Bacteria;p__Bacteroidetes;c__Chitinophagia;o__Chitinophagales;f__Chitinophagaceae;g__Terrimonas;s__Terrimonas ferruginea
ASV10021	4	0	0	0	0	0	0	0	0	0	177.19	0	0	0	0	0	0	0	0	0	35.438	0.001	-15.113	0.125007	0.349364	d__Bacteria;p__Proteobacteria;c__Betaproteobacteria;o__Nitrosomonadales;f__Sterolibacteriaceae;g__Methyloversatilis;s__Methyloversatilis discipulorum_A
ASV10022	4	0	0	0	0	0	0	0	0	0	177.19	0	0	0	0	0	0	0	0	0	35.438	0.001	-15.113	0.125007	0.349364	d__Bacteria;p__Proteobacteria;c__Alphaproteobacteria;o__Hyphomicrobiales;f__Devosiaceae;g__Youhaiella;s__Youhaiella tibetensis
ASV10023	0	0	0	0	0	0	4	0	0	0	0	0	0	0	0	0	169.03	0	0	0	0.001	33.806	15.045	0.125007	0.349364	d__Bacteria;p__Proteobacteria;c__Alphaproteobacteria;o__Hyphomicrobiales;f__Xanthobacteraceae;g__Pseudolabrys;s__uncultured bacterium
ASV10024	0	4	0	0	0	0	0	0	0	0	0	180.35	0	0	0	0	0	0	0	0	36.07	0.001	-15.1385	0.125007	0.349364	d__Bacteria;p__Proteobacteria;c__Oligoflexia;o__Bdellovibrionales;f__Bdellovibrionaceae;g__Bdellovibrio;s__Bdellovibrio bacteriovorus_A
ASV10025	0	0	0	4	0	0	0	0	0	0	0	0	0	185.37	0	0	0	0	0	0	37.074	0.001	-15.1781	0.0625063	0.332325	d__Bacteria;p__Chloroflexi;c__Ktedonobacteria;o__Ktedonobacterales;f__Ktedonobacteraceae;g__Ktedonobacter;s__Ktedonobacter racemifer
ASV10026	0	0	0	0	0	4	0	0	0	0	0	0	0	0	0	221.9	0	0	0	0	0.001	44.38	15.4376	0.0625063	0.332325	d__Bacteria;p__Acidobacteria;c__Vicinamibacteria;o__norank;f__Vicinamibacteraceae;g__Luteitalea;s__Luteitalea pratensis
ASV10027	4	0	0	0	0	0	0	0	0	0	177.19	0	0	0	0	0	0	0	0	0	35.438	0.001	-15.113	0.125007	0.349364	d__Bacteria;p__Bacteroidetes;c__Flavobacteriia;o__Flavobacteriales;f__Cryomorphaceae;g__Cryomorpha
ASV10028	0	0	0	0	4	0	0	0	0	0	0	0	0	0	190.97	0	0	0	0	0	38.194	0.001	-15.2211	0.00781469	0.0892477	Unclassified
ASV10029	0	0	4	0	0	0	0	0	0	0	0	0	168.72	0	0	0	0	0	0	0	33.744	0.001	-15.0423	0.250007	0.441558	d__Bacteria;p__Acidobacteria;c__Acidobacteriia;o__Acidobacteriales;f__Acidobacteriaceae;g__Candidatus Koribacter;s__uncultured bacterium
ASV1003	0	0	0	18	0	0	0	0	0	0	0	0	0	834.18	0	0	0	0	0	0	166.836	0.001	-17.3481	3.82122e-06	0.000205887	d__Bacteria;p__Proteobacteria;c__Gammaproteobacteria;o__Chromatiales;f__Thioalkalispiraceae;g__Sulfurivermis;s__Sulfurivermis fontis
ASV10030	0	4	0	0	0	0	0	0	0	0	0	180.35	0	0	0	0	0	0	0	0	36.07	0.001	-15.1385	0.125007	0.349364	d__Bacteria;p__Gemmatimonadetes;c__Gemmatimonadetes;o__Gemmatimonadales;f__Gemmatimonadaceae;g__Gemmatirosa;s__Gemmatirosa kalamazoonesis
ASV10031	0	4	0	0	0	0	0	0	0	0	0	180.35	0	0	0	0	0	0	0	0	36.07	0.001	-15.1385	0.125007	0.349364	d__Bacteria;p__Verrucomicrobia;c__Verrucomicrobiae;o__Verrucomicrobiales;f__Verrucomicrobia subdivision 3;g__Pedosphaera;s__uncultured bacterium
ASV10032	0	0	4	0	0	0	0	0	0	0	0	0	168.72	0	0	0	0	0	0	0	33.744	0.001	-15.0423	0.250007	0.441558	d__Bacteria;p__Proteobacteria;c__Alphaproteobacteria;o__Rhodospirillales;f__Rhodospirillaceae;g__Hypericibacter;s__Hypericibacter adhaerens
ASV10033	0	0	0	0	0	4	0	0	0	0	0	0	0	0	0	221.9	0	0	0	0	0.001	44.38	15.4376	0.0625063	0.332325	d__Bacteria;p__Proteobacteria;c__Alphaproteobacteria;o__Hyphomicrobiales;f__Roseiarcaceae;g__Roseiarcus
ASV10034	0	0	4	0	0	0	0	0	0	0	0	0	168.72	0	0	0	0	0	0	0	33.744	0.001	-15.0423	0.250007	0.441558	d__Bacteria;p__Planctomycetes;c__Phycisphaerae;o__Sedimentisphaerales;f__Sedimentisphaeraceae;g__Limihaloglobus;s__Limihaloglobus sulfuriphilus
ASV10035	0	0	4	0	0	0	0	0	0	0	0	0	168.72	0	0	0	0	0	0	0	33.744	0.001	-15.0423	0.250007	0.441558	d__Bacteria;p__Acidobacteria;c__Acidobacteriia;o__Acidobacteriales;f__Acidobacteriaceae;g__Candidatus Koribacter;s__uncultured bacterium
ASV10036	0	0	0	0	0	0	0	0	4	0	0	0	0	0	0	0	0	0	185.43	0	0.001	37.086	15.1786	0.0625063	0.332325	d__Bacteria;p__Bacteroidetes;c__Chitinophagia;o__Chitinophagales;f__Chitinophagaceae;g__Puia;s__uncultured bacterium
ASV10037	0	0	0	0	0	0	0	0	0	4	0	0	0	0	0	0	0	0	0	178.95	0.001	35.79	15.1273	0.250007	0.441558	d__Bacteria;p__Planctomycetes;c__Planctomycetia;o__Gemmatales;f__Gemmataceae;g__Gemmata;s__Gemmata massiliana_A
ASV10038	0	4	0	0	0	0	0	0	0	0	0	180.35	0	0	0	0	0	0	0	0	36.07	0.001	-15.1385	0.125007	0.349364	Unclassified
ASV10039	0	0	0	4	0	0	0	0	0	0	0	0	0	185.37	0	0	0	0	0	0	37.074	0.001	-15.1781	0.0625063	0.332325	d__Bacteria;p__Proteobacteria;c__Alphaproteobacteria;o__Hyphomicrobiales;f__Hyphomicrobiaceae;g__Rhodoplanes;s__uncultured bacterium
ASV1004	0	0	0	0	18	0	0	0	0	0	0	0	0	0	859.35	0	0	0	0	0	171.87	0.001	-17.391	9.35662e-10	1.26987e-07	d__Bacteria;p__Proteobacteria;c__Alphaproteobacteria;o__Hyphomicrobiales;f__Bradyrhizobiaceae;g__Bradyrhizobium;s__uncultured bacterium
ASV10040	0	0	0	0	0	0	0	0	0	4	0	0	0	0	0	0	0	0	0	178.95	0.001	35.79	15.1273	0.250007	0.441558	d__Bacteria;p__Proteobacteria;c__Alphaproteobacteria;o__Hyphomicrobiales;f__Hyphomicrobiaceae;g__Methyloceanibacter
ASV10041	0	0	0	0	0	0	4	0	0	0	0	0	0	0	0	0	169.03	0	0	0	0.001	33.806	15.045	0.125007	0.349364	d__Bacteria;p__Proteobacteria;c__Alphaproteobacteria;o__Rhodospirillales;f__Rhodospirillaceae;g__Dongia;s__Dongia mobilis
ASV10042	0	0	0	0	0	4	0	0	0	0	0	0	0	0	0	221.9	0	0	0	0	0.001	44.38	15.4376	0.0625063	0.332325	d__Bacteria;p__Proteobacteria;c__Alphaproteobacteria;o__Hyphomicrobiales;f__norank;g__Pseudorhodoplanes;s__Pseudorhodoplanes sinuspersici
ASV10043	0	0	0	4	0	0	0	0	0	0	0	0	0	185.37	0	0	0	0	0	0	37.074	0.001	-15.1781	0.0625063	0.332325	d__Bacteria;p__Acidobacteria;c__Acidobacteriia;o__Acidobacteriales;f__Acidobacteriaceae;g__Silvibacterium;s__Silvibacterium dinghuense
ASV10044	0	0	0	0	0	0	0	0	4	0	0	0	0	0	0	0	0	0	185.43	0	0.001	37.086	15.1786	0.0625063	0.332325	d__Bacteria;p__Proteobacteria;c__Alphaproteobacteria;o__Hyphomicrobiales;f__Xanthobacteraceae;g__Pseudolabrys
ASV10045	0	0	4	0	0	0	0	0	0	0	0	0	168.72	0	0	0	0	0	0	0	33.744	0.001	-15.0423	0.250007	0.441558	d__Bacteria;p__Firmicutes;c__Clostridia;o__Eubacteriales;f__Peptococcaceae;g__Pelotomaculum;s__Pelotomaculum thermopropionicum
ASV10046	0	4	0	0	0	0	0	0	0	0	0	180.35	0	0	0	0	0	0	0	0	36.07	0.001	-15.1385	0.125007	0.349364	Unclassified
ASV10047	0	0	0	0	4	0	0	0	0	0	0	0	0	0	190.97	0	0	0	0	0	38.194	0.001	-15.2211	0.00781469	0.0892477	Unclassified
ASV10048	0	0	0	0	0	0	0	0	0	4	0	0	0	0	0	0	0	0	0	178.95	0.001	35.79	15.1273	0.250007	0.441558	d__Bacteria;p__Bacteroidetes;c__Chitinophagia;o__Chitinophagales;f__Chitinophagaceae;g__Niastella;s__Niastella koreensis
ASV10049	4	0	0	0	0	0	0	0	0	0	177.19	0	0	0	0	0	0	0	0	0	35.438	0.001	-15.113	0.125007	0.349364	d__Bacteria;p__Planctomycetes;c__Phycisphaerae;o__Tepidisphaerales;f__Tepidisphaeraceae;g__Tepidisphaera;s__uncultured bacterium
ASV1005	0	0	0	18	0	0	0	0	0	0	0	0	0	834.18	0	0	0	0	0	0	166.836	0.001	-17.3481	3.82122e-06	0.000205887	d__Bacteria;p__Planctomycetes;c__Phycisphaerae;o__Sedimentisphaerales;f__Sedimentisphaeraceae;g__Limihaloglobus;s__Limihaloglobus sulfuriphilus
ASV10050	4	0	0	0	0	0	0	0	0	0	177.19	0	0	0	0	0	0	0	0	0	35.438	0.001	-15.113	0.125007	0.349364	d__Bacteria;p__Bacteroidetes;c__Sphingobacteriia;o__Sphingobacteriales;f__Sphingobacteriaceae
ASV10051	0	0	0	0	0	0	4	0	0	0	0	0	0	0	0	0	169.03	0	0	0	0.001	33.806	15.045	0.125007	0.349364	d__Bacteria;p__Gemmatimonadetes;c__Gemmatimonadetes;o__Gemmatimonadales;f__Gemmatimonadaceae;g__Gemmatimonas;s__Gemmatimonas phototrophica
ASV10052	0	0	0	0	0	0	4	0	0	0	0	0	0	0	0	0	169.03	0	0	0	0.001	33.806	15.045	0.125007	0.349364	d__Bacteria;p__Gemmatimonadetes;c__Gemmatimonadetes;o__Gemmatimonadales;f__Gemmatimonadaceae;g__Gemmatirosa;s__Gemmatirosa kalamazoonesis
ASV10053	0	0	4	0	0	0	0	0	0	0	0	0	168.72	0	0	0	0	0	0	0	33.744	0.001	-15.0423	0.250007	0.441558	d__Bacteria;p__Proteobacteria;c__Gammaproteobacteria;o__norank;f__norank;g__Acidibacter;s__uncultured gamma proteobacterium
ASV10054	0	0	0	4	0	0	0	0	0	0	0	0	0	185.37	0	0	0	0	0	0	37.074	0.001	-15.1781	0.0625063	0.332325	d__Bacteria;p__Proteobacteria;c__Betaproteobacteria;o__Nitrosomonadales;f__Sterolibacteriaceae;g__Denitratisoma;s__Denitratisoma sp007833355
ASV10055	0	4	0	0	0	0	0	0	0	0	0	180.35	0	0	0	0	0	0	0	0	36.07	0.001	-15.1385	0.125007	0.349364	d__Bacteria;p__Acidobacteria;c__Acidobacteriia;o__Acidobacteriales;f__Acidobacteriaceae;g__Candidatus Koribacter;s__uncultured bacterium
ASV10056	0	0	0	0	4	0	0	0	0	0	0	0	0	0	190.97	0	0	0	0	0	38.194	0.001	-15.2211	0.00781469	0.0892477	d__Bacteria;p__Planctomycetes;c__Planctomycetia;o__Gemmatales;f__Gemmataceae;g__Gemmata
ASV10057	0	0	0	0	0	0	0	0	4	0	0	0	0	0	0	0	0	0	185.43	0	0.001	37.086	15.1786	0.0625063	0.332325	d__Bacteria;p__Proteobacteria;c__Betaproteobacteria;o__Burkholderiales;f__Burkholderiaceae;g__Caballeronia;s__Caballeronia concitans
ASV10058	0	0	0	0	0	4	0	0	0	0	0	0	0	0	0	221.9	0	0	0	0	0.001	44.38	15.4376	0.0625063	0.332325	d__Bacteria;p__Bacteroidetes;c__Chitinophagia;o__Chitinophagales;f__Chitinophagaceae;g__Panacibacter
ASV10059	0	4	0	0	0	0	0	0	0	0	0	180.35	0	0	0	0	0	0	0	0	36.07	0.001	-15.1385	0.125007	0.349364	d__Bacteria;p__Proteobacteria;c__Alphaproteobacteria;o__Rickettsiales;f__Anaplasmataceae;g__Wolbachia;s__Wolbachia sp902636535
ASV1006	0	0	0	0	0	18	0	0	0	0	0	0	0	0	0	998.56	0	0	0	0	0.001	199.712	17.6076	9.55679e-07	6.34793e-05	d__Bacteria;p__Bacteroidetes;c__Chitinophagia;o__Chitinophagales;f__Chitinophagaceae;g__Ferruginibacter;s__metagenome
ASV10060	0	0	0	0	0	4	0	0	0	0	0	0	0	0	0	221.9	0	0	0	0	0.001	44.38	15.4376	0.0625063	0.332325	d__Bacteria;p__Verrucomicrobia;c__Spartobacteria;o__Chthoniobacterales;f__Chthoniobacteraceae;g__Chthoniobacter;s__Chthoniobacter flavus
ASV10061	0	0	0	0	0	0	4	0	0	0	0	0	0	0	0	0	169.03	0	0	0	0.001	33.806	15.045	0.125007	0.349364	d__Bacteria;p__Proteobacteria;c__Alphaproteobacteria;o__Hyphomonadales;f__Hyphomonadaceae;g__Hirschia;s__metagenome
ASV10062	0	0	0	0	0	0	4	0	0	0	0	0	0	0	0	0	169.03	0	0	0	0.001	33.806	15.045	0.125007	0.349364	d__Bacteria;p__Bacteroidetes;c__Chitinophagia;o__Chitinophagales;f__Chitinophagaceae;g__Niabella;s__Niabella ginsenosidivorans
ASV10063	0	0	0	0	4	0	0	0	0	0	0	0	0	0	190.97	0	0	0	0	0	38.194	0.001	-15.2211	0.00781469	0.0892477	d__Bacteria;p__Bacteroidetes;c__Cytophagia;o__Cytophagales;f__Cytophagaceae;g__Cytophaga;s__Cytophaga hutchinsonii
ASV10064	0	0	0	0	0	0	0	0	4	0	0	0	0	0	0	0	0	0	185.43	0	0.001	37.086	15.1786	0.0625063	0.332325	d__Bacteria;p__Proteobacteria;c__Alphaproteobacteria;o__Hyphomicrobiales;f__Phyllobacteriaceae;g__Mesorhizobium;s__Mesorhizobium ciceri
ASV10065	0	0	0	0	0	4	0	0	0	0	0	0	0	0	0	221.9	0	0	0	0	0.001	44.38	15.4376	0.0625063	0.332325	d__Bacteria;p__Chloroflexi;c__Ktedonobacteria;o__Ktedonobacterales;f__Ktedonosporobacteraceae;g__Ktedonosporobacter;s__Ktedonosporobacter rubrisoli
ASV10066	0	0	4	0	0	0	0	0	0	0	0	0	168.72	0	0	0	0	0	0	0	33.744	0.001	-15.0423	0.250007	0.441558	d__Bacteria;p__Proteobacteria;c__Gammaproteobacteria;o__Legionellales;f__Coxiellaceae;g__Coxiella;s__Coxiella burnetii
ASV10067	0	0	0	0	4	0	0	0	0	0	0	0	0	0	190.97	0	0	0	0	0	38.194	0.001	-15.2211	0.00781469	0.0892477	d__Bacteria;p__Acidobacteria;c__Acidobacteriia;o__Acidobacteriales;f__Acidobacteriaceae;g__Silvibacterium;s__Silvibacterium bohemicum
ASV10068	4	0	0	0	0	0	0	0	0	0	177.19	0	0	0	0	0	0	0	0	0	35.438	0.001	-15.113	0.125007	0.349364	d__Bacteria;p__Actinobacteria;c__Actinomycetia;o__Acidothermales;f__Acidothermaceae;g__Acidothermus;s__uncultured bacterium
ASV10069	0	0	0	0	0	0	0	0	4	0	0	0	0	0	0	0	0	0	185.43	0	0.001	37.086	15.1786	0.0625063	0.332325	d__Bacteria;p__Candidatus Saccharibacteria;c__norank;o__norank;f__norank;g__Candidatus Saccharimonas;s__Saccharimonas aalborgensis
ASV1007	0	0	0	0	0	0	18	0	0	0	0	0	0	0	0	0	760.65	0	0	0	0.001	152.13	17.2149	3.82122e-06	0.000205887	d__Bacteria;p__Acidobacteria;c__Vicinamibacteria;o__norank;f__Vicinamibacteraceae;g__Luteitalea;s__Luteitalea pratensis
ASV10070	0	0	0	0	0	0	0	0	4	0	0	0	0	0	0	0	0	0	185.43	0	0.001	37.086	15.1786	0.0625063	0.332325	d__Bacteria;p__Gemmatimonadetes;c__Gemmatimonadetes;o__Gemmatimonadales;f__Gemmatimonadaceae;g__Gemmatimonas;s__Gemmatimonas phototrophica
ASV10071	0	0	0	0	0	0	4	0	0	0	0	0	0	0	0	0	169.03	0	0	0	0.001	33.806	15.045	0.125007	0.349364	d__Bacteria;p__Proteobacteria;c__Alphaproteobacteria;o__Hyphomicrobiales;f__Hyphomicrobiaceae;g__Methyloceanibacter;s__uncultured bacterium
ASV10072	0	0	0	0	4	0	0	0	0	0	0	0	0	0	190.97	0	0	0	0	0	38.194	0.001	-15.2211	0.00781469	0.0892477	d__Bacteria;p__Proteobacteria;c__Alphaproteobacteria;o__Rhodospirillales;f__Rhodospirillaceae;g__Dongia;s__Dongia mobilis
ASV10073	0	0	0	0	4	0	0	0	0	0	0	0	0	0	190.97	0	0	0	0	0	38.194	0.001	-15.2211	0.00781469	0.0892477	d__Bacteria;p__Acidobacteria;c__Acidobacteriia;o__Acidobacteriales;f__Acidobacteriaceae;g__Candidatus Koribacter;s__uncultured bacterium
ASV10074	0	0	0	0	0	0	0	0	4	0	0	0	0	0	0	0	0	0	185.43	0	0.001	37.086	15.1786	0.0625063	0.332325	d__Bacteria;p__Planctomycetes;c__Planctomycetia;o__Pirellulales;f__Pirellulaceae;g__Bremerella;s__Bremerella marina_B
ASV10075	0	0	0	0	4	0	0	0	0	0	0	0	0	0	190.97	0	0	0	0	0	38.194	0.001	-15.2211	0.00781469	0.0892477	d__Bacteria;p__Verrucomicrobia;c__Spartobacteria;o__Chthoniobacterales;f__Chthoniobacteraceae;g__Candidatus Udaeobacter;s__Udaeobacter sp003218615
ASV10076	0	0	0	4	0	0	0	0	0	0	0	0	0	185.37	0	0	0	0	0	0	37.074	0.001	-15.1781	0.0625063	0.332325	d__Bacteria;p__Bacteroidetes;c__Chitinophagia;o__Chitinophagales;f__Chitinophagaceae;g__Edaphobaculum;s__metagenome
ASV10077	0	0	0	0	4	0	0	0	0	0	0	0	0	0	190.97	0	0	0	0	0	38.194	0.001	-15.2211	0.00781469	0.0892477	d__Bacteria;p__Proteobacteria;c__Alphaproteobacteria;o__Rhodospirillales;f__Rhodospirillaceae;g__Hypericibacter;s__Hypericibacter terrae
ASV10078	0	0	0	4	0	0	0	0	0	0	0	0	0	185.37	0	0	0	0	0	0	37.074	0.001	-15.1781	0.0625063	0.332325	d__Bacteria;p__Bacteroidetes;c__Chitinophagia;o__Chitinophagales;f__Chitinophagaceae;g__Edaphobaculum
ASV10079	0	0	0	0	0	0	0	0	0	4	0	0	0	0	0	0	0	0	0	178.95	0.001	35.79	15.1273	0.250007	0.441558	d__Bacteria;p__Planctomycetes;c__Planctomycetia;o__Pirellulales;f__Pirellulaceae;g__Rhodopirellula;s__uncultured bacterium
ASV1008	0	0	0	18	0	0	0	0	0	0	0	0	0	834.18	0	0	0	0	0	0	166.836	0.001	-17.3481	3.82122e-06	0.000205887	d__Bacteria;p__Proteobacteria;c__Gammaproteobacteria;o__norank;f__norank;g__Acidibacter;s__uncultured gamma proteobacterium
ASV10080	0	4	0	0	0	0	0	0	0	0	0	180.35	0	0	0	0	0	0	0	0	36.07	0.001	-15.1385	0.125007	0.349364	d__Bacteria;p__Acidobacteria;c__Acidobacteriia;o__Bryobacterales;f__Bryobacteraceae;g__Bryobacter;s__Bryobacter aggregatus
ASV10081	4	0	0	0	0	0	0	0	0	0	177.19	0	0	0	0	0	0	0	0	0	35.438	0.001	-15.113	0.125007	0.349364	d__Bacteria;p__Actinobacteria;c__Actinomycetia;o__Micrococcales;f__Microbacteriaceae;g__Leifsonia;s__Leifsonia sp002105485
ASV10082	0	0	0	0	0	0	0	0	0	4	0	0	0	0	0	0	0	0	0	178.95	0.001	35.79	15.1273	0.250007	0.441558	d__Bacteria;p__Firmicutes;c__Clostridia;o__Eubacteriales;f__Peptococcaceae;g__Desulfosporosinus;s__Desulfosporosinus orientis
ASV10083	0	0	0	0	0	0	0	0	0	4	0	0	0	0	0	0	0	0	0	178.95	0.001	35.79	15.1273	0.250007	0.441558	d__Bacteria;p__Proteobacteria;c__Gammaproteobacteria;o__Legionellales;f__Coxiellaceae;g__Aquicella;s__Aquicella lusitana
ASV10084	0	4	0	0	0	0	0	0	0	0	0	180.35	0	0	0	0	0	0	0	0	36.07	0.001	-15.1385	0.125007	0.349364	d__Bacteria;p__Proteobacteria;c__Gammaproteobacteria;o__Legionellales;f__Coxiellaceae;g__Aquicella;s__Aquicella lusitana
ASV10085	0	0	0	4	0	0	0	0	0	0	0	0	0	185.37	0	0	0	0	0	0	37.074	0.001	-15.1781	0.0625063	0.332325	d__Bacteria;p__Proteobacteria;c__Gammaproteobacteria;o__Nevskiales;f__Sinobacteraceae;g__Nevskia;s__Nevskia ramosa
ASV10086	0	0	0	0	0	0	0	0	0	4	0	0	0	0	0	0	0	0	0	178.95	0.001	35.79	15.1273	0.250007	0.441558	d__Bacteria;p__Planctomycetes;c__Phycisphaerae;o__Phycisphaerales;f__Phycisphaeraceae;g__Phycisphaera;s__uncultured bacterium
ASV10087	0	4	0	0	0	0	0	0	0	0	0	180.35	0	0	0	0	0	0	0	0	36.07	0.001	-15.1385	0.125007	0.349364	d__Bacteria;p__Acidobacteria;c__Acidobacteriia;o__Acidobacteriales;f__Acidobacteriaceae;g__Candidatus Koribacter;s__uncultured bacterium
ASV10088	0	0	0	0	0	0	4	0	0	0	0	0	0	0	0	0	169.03	0	0	0	0.001	33.806	15.045	0.125007	0.349364	d__Bacteria;p__Proteobacteria;c__Alphaproteobacteria;o__Sphingomonadales;f__Sphingomonadaceae;g__Allosphingosinicella;s__Allosphingosinicella sp013816585
ASV10089	0	4	0	0	0	0	0	0	0	0	0	180.35	0	0	0	0	0	0	0	0	36.07	0.001	-15.1385	0.125007	0.349364	d__Bacteria;p__Verrucomicrobia;c__Verrucomicrobiae;o__Verrucomicrobiales;f__Verrucomicrobia subdivision 3;g__Pedosphaera;s__uncultured bacterium
ASV1009	0	0	0	0	0	0	18	0	0	0	0	0	0	0	0	0	760.65	0	0	0	0.001	152.13	17.2149	3.82122e-06	0.000205887	d__Bacteria;p__Acidobacteria;c__Vicinamibacteria;o__norank;f__Vicinamibacteraceae;g__Luteitalea;s__Luteitalea pratensis
ASV10090	0	0	0	0	0	4	0	0	0	0	0	0	0	0	0	221.9	0	0	0	0	0.001	44.38	15.4376	0.0625063	0.332325	d__Bacteria;p__Verrucomicrobia;c__Spartobacteria;o__Chthoniobacterales;f__Chthoniobacteraceae;g__Chthoniobacter;s__Chthoniobacter flavus
ASV10091	0	0	0	0	0	4	0	0	0	0	0	0	0	0	0	221.9	0	0	0	0	0.001	44.38	15.4376	0.0625063	0.332325	d__Bacteria;p__Acidobacteria;c__Vicinamibacteria;o__norank;f__Vicinamibacteraceae;g__Luteitalea;s__Luteitalea pratensis
ASV10092	4	0	0	0	0	0	0	0	0	0	177.19	0	0	0	0	0	0	0	0	0	35.438	0.001	-15.113	0.125007	0.349364	d__Bacteria;p__Bacteroidetes;c__Chitinophagia;o__Chitinophagales;f__Chitinophagaceae;g__Paraflavitalea;s__Paraflavitalea soli
ASV10093	0	4	0	0	0	0	0	0	0	0	0	180.35	0	0	0	0	0	0	0	0	36.07	0.001	-15.1385	0.125007	0.349364	d__Bacteria;p__Acidobacteria;c__Acidobacteriia;o__Acidobacteriales;f__Acidobacteriaceae;g__Occallatibacter
ASV10094	0	0	0	0	0	0	0	0	4	0	0	0	0	0	0	0	0	0	185.43	0	0.001	37.086	15.1786	0.0625063	0.332325	d__Bacteria;p__Proteobacteria;c__Deltaproteobacteria;o__Desulfuromonadales;f__Geobacteraceae;g__Geobacter;s__Trichlorobacter lovleyi
ASV10095	4	0	0	0	0	0	0	0	0	0	177.19	0	0	0	0	0	0	0	0	0	35.438	0.001	-15.113	0.125007	0.349364	Unclassified
ASV10096	0	4	0	0	0	0	0	0	0	0	0	180.35	0	0	0	0	0	0	0	0	36.07	0.001	-15.1385	0.125007	0.349364	d__Bacteria;p__Proteobacteria;c__Betaproteobacteria;o__Nitrosomonadales;f__Sterolibacteriaceae;g__Denitratisoma;s__Denitratisoma sp007833355
ASV10097	4	0	0	0	0	0	0	0	0	0	177.19	0	0	0	0	0	0	0	0	0	35.438	0.001	-15.113	0.125007	0.349364	d__Bacteria;p__Proteobacteria;c__Alphaproteobacteria;o__Hyphomicrobiales;f__norank;g__Pseudorhodoplanes;s__Pseudorhodoplanes sinuspersici
ASV10098	0	0	0	0	0	0	4	0	0	0	0	0	0	0	0	0	169.03	0	0	0	0.001	33.806	15.045	0.125007	0.349364	d__Bacteria;p__Proteobacteria;c__Alphaproteobacteria;o__Rhodospirillales;f__Rhodospirillaceae;g__Hypericibacter;s__Hypericibacter adhaerens
ASV10099	0	4	0	0	0	0	0	0	0	0	0	180.35	0	0	0	0	0	0	0	0	36.07	0.001	-15.1385	0.125007	0.349364	d__Bacteria;p__Proteobacteria;c__Alphaproteobacteria;o__Hyphomicrobiales;f__Hyphomicrobiaceae;g__Hyphomicrobium
ASV101	0	0	0	0	0	76	0	0	0	0	0	0	0	0	0	4216.13	0	0	0	0	0.001	843.226	19.6856	6.7143e-27	4.95831e-24	Unclassified
ASV1010	0	0	18	0	0	0	0	0	0	0	0	0	759.24	0	0	0	0	0	0	0	151.848	0.001	-17.2123	0.000488604	0.0120038	d__Bacteria;p__Proteobacteria;c__Gammaproteobacteria;o__norank;f__norank;g__Acidibacter;s__uncultured bacterium
ASV10100	4	0	0	0	0	0	0	0	0	0	177.19	0	0	0	0	0	0	0	0	0	35.438	0.001	-15.113	0.125007	0.349364	d__Bacteria;p__Proteobacteria;c__Alphaproteobacteria;o__Hyphomicrobiales;f__Phyllobacteriaceae;g__Mesorhizobium;s__Mesorhizobium sp004017535
ASV10101	0	0	4	0	0	0	0	0	0	0	0	0	168.72	0	0	0	0	0	0	0	33.744	0.001	-15.0423	0.250007	0.441558	d__Bacteria;p__Acidobacteria;c__Vicinamibacteria;o__norank;f__Vicinamibacteraceae;g__Luteitalea;s__Luteitalea pratensis
ASV10102	0	0	0	0	0	4	0	0	0	0	0	0	0	0	0	221.9	0	0	0	0	0.001	44.38	15.4376	0.0625063	0.332325	d__Bacteria;p__Planctomycetes;c__Planctomycetia;o__Pirellulales;f__Lacipirellulaceae;g__Bythopirellula;s__uncultured bacterium
ASV10103	0	0	0	0	0	0	0	0	0	4	0	0	0	0	0	0	0	0	0	178.95	0.001	35.79	15.1273	0.250007	0.441558	d__Bacteria;p__Planctomycetes;c__Planctomycetia;o__Gemmatales;f__Gemmataceae;g__Fimbriiglobus;s__Fimbriiglobus ruber
ASV10104	0	0	0	0	0	0	0	0	4	0	0	0	0	0	0	0	0	0	185.43	0	0.001	37.086	15.1786	0.0625063	0.332325	d__Bacteria;p__Proteobacteria;c__Alphaproteobacteria;o__Hyphomicrobiales;f__Xanthobacteraceae;g__Pseudolabrys;s__uncultured bacterium
ASV10105	0	0	0	0	0	4	0	0	0	0	0	0	0	0	0	221.9	0	0	0	0	0.001	44.38	15.4376	0.0625063	0.332325	d__Bacteria;p__Planctomycetes;c__Planctomycetia;o__Gemmatales;f__Gemmataceae;g__Gemmata;s__Gemmata massiliana_A
ASV10106	0	4	0	0	0	0	0	0	0	0	0	180.35	0	0	0	0	0	0	0	0	36.07	0.001	-15.1385	0.125007	0.349364	d__Bacteria;p__Acidobacteria;c__Acidobacteriia;o__Acidobacteriales;f__Acidobacteriaceae;g__Candidatus Koribacter
ASV10107	0	0	4	0	0	0	0	0	0	0	0	0	168.72	0	0	0	0	0	0	0	33.744	0.001	-15.0423	0.250007	0.441558	d__Bacteria;p__Verrucomicrobia;c__Verrucomicrobiae;o__Verrucomicrobiales;f__Verrucomicrobia subdivision 3;g__Pedosphaera;s__uncultured bacterium
ASV10108	0	0	0	0	0	0	0	0	4	0	0	0	0	0	0	0	0	0	185.43	0	0.001	37.086	15.1786	0.0625063	0.332325	d__Bacteria;p__Proteobacteria;c__Deltaproteobacteria;o__Myxococcales;f__norank;g__Minicystis;s__Minicystis rosea
ASV10109	0	0	0	0	0	0	0	0	4	0	0	0	0	0	0	0	0	0	185.43	0	0.001	37.086	15.1786	0.0625063	0.332325	d__Bacteria;p__Proteobacteria;c__Gammaproteobacteria;o__Xanthomonadales;f__Rhodanobacteraceae;g__Rhodanobacter;s__uncultured bacterium
ASV1011	0	0	0	0	18	0	0	0	0	0	0	0	0	0	859.35	0	0	0	0	0	171.87	0.001	-17.391	9.35662e-10	1.26987e-07	d__Bacteria;p__Bacteroidetes;c__Chitinophagia;o__Chitinophagales;f__Chitinophagaceae;g__Sediminibacterium;s__Sediminibacterium magnilacihabitans
ASV10110	4	0	0	0	0	0	0	0	0	0	177.19	0	0	0	0	0	0	0	0	0	35.438	0.001	-15.113	0.125007	0.349364	d__Bacteria;p__Bacteroidetes;c__Bacteroidia;o__Bacteroidales;f__Dysgonomonadaceae;g__Proteiniphilum;s__Proteiniphilum sp012837345
ASV10111	0	0	0	0	0	0	0	0	4	0	0	0	0	0	0	0	0	0	185.43	0	0.001	37.086	15.1786	0.0625063	0.332325	d__Bacteria;p__Planctomycetes;c__Phycisphaerae;o__Sedimentisphaerales;f__Anaerohalosphaeraceae;g__Anaerohalosphaera;s__Anaerohalosphaera lusitana
ASV10112	0	0	0	0	0	4	0	0	0	0	0	0	0	0	0	221.9	0	0	0	0	0.001	44.38	15.4376	0.0625063	0.332325	Unclassified
ASV10113	0	4	0	0	0	0	0	0	0	0	0	180.35	0	0	0	0	0	0	0	0	36.07	0.001	-15.1385	0.125007	0.349364	d__Bacteria;p__Chloroflexi;c__Anaerolineae;o__Anaerolineales;f__Anaerolineaceae;g__Ornatilinea;s__Ornatilinea apprima
ASV10114	0	0	0	0	4	0	0	0	0	0	0	0	0	0	190.97	0	0	0	0	0	38.194	0.001	-15.2211	0.00781469	0.0892477	d__Bacteria;p__Verrucomicrobia;c__Verrucomicrobiae;o__Verrucomicrobiales;f__Verrucomicrobia subdivision 3;g__Pedosphaera;s__uncultured bacterium
ASV10115	0	0	0	0	4	0	0	0	0	0	0	0	0	0	190.97	0	0	0	0	0	38.194	0.001	-15.2211	0.00781469	0.0892477	d__Bacteria;p__Proteobacteria;c__Betaproteobacteria;o__Burkholderiales;f__Oxalobacteraceae;g__Noviherbaspirillum;s__Noviherbaspirillum sp007874125
ASV10116	0	0	0	0	0	4	0	0	0	0	0	0	0	0	0	221.9	0	0	0	0	0.001	44.38	15.4376	0.0625063	0.332325	d__Bacteria;p__Planctomycetes;c__Planctomycetia;o__Planctomycetales;f__Planctomycetaceae;g__Gimesia;s__Gimesia sp002724985
ASV10117	0	4	0	0	0	0	0	0	0	0	0	180.35	0	0	0	0	0	0	0	0	36.07	0.001	-15.1385	0.125007	0.349364	d__Bacteria;p__Proteobacteria;c__Gammaproteobacteria;o__Nevskiales;f__Steroidobacteraceae
ASV10118	0	0	0	0	0	4	0	0	0	0	0	0	0	0	0	221.9	0	0	0	0	0.001	44.38	15.4376	0.0625063	0.332325	d__Bacteria;p__Bacteroidetes;c__Cytophagia;o__Cytophagales;f__Fulvivirgaceae;g__Chryseolinea;s__Chryseolinea serpens
ASV10119	0	0	0	0	0	4	0	0	0	0	0	0	0	0	0	221.9	0	0	0	0	0.001	44.38	15.4376	0.0625063	0.332325	d__Bacteria;p__Proteobacteria;c__Alphaproteobacteria;o__Rhodospirillales;f__Rhodospirillaceae;g__Hypericibacter;s__Hypericibacter terrae
ASV1012	0	0	0	0	0	0	12	0	6	0	0	0	0	0	0	0	507.1	0	278.15	0	0.001	157.05	17.2609	1.91098e-06	0.000112236	d__Bacteria;p__Acidobacteria;c__Acidobacteriia;o__Acidobacteriales;f__Acidobacteriaceae;g__Terriglobus;s__Terriglobus roseus
ASV10120	0	0	4	0	0	0	0	0	0	0	0	0	168.72	0	0	0	0	0	0	0	33.744	0.001	-15.0423	0.250007	0.441558	d__Bacteria;p__Proteobacteria;c__Alphaproteobacteria;o__Rhodospirillales;f__Acetobacteraceae;g__Granulibacter;s__Granulibacter bethesdensis
ASV10121	0	0	4	0	0	0	0	0	0	0	0	0	168.72	0	0	0	0	0	0	0	33.744	0.001	-15.0423	0.250007	0.441558	d__Bacteria;p__Acidobacteria;c__Acidobacteriia;o__Acidobacteriales;f__Acidobacteriaceae;g__Candidatus Koribacter;s__uncultured bacterium
ASV10122	0	0	0	0	0	0	0	0	4	0	0	0	0	0	0	0	0	0	185.43	0	0.001	37.086	15.1786	0.0625063	0.332325	d__Bacteria;p__Acidobacteria;c__Acidobacteriia;o__Acidobacteriales;f__Acidobacteriaceae;g__Granulicella;s__uncultured bacterium
ASV10123	0	0	4	0	0	0	0	0	0	0	0	0	168.72	0	0	0	0	0	0	0	33.744	0.001	-15.0423	0.250007	0.441558	d__Bacteria;p__Acidobacteria;c__Acidobacteriia;o__Acidobacteriales;f__Acidobacteriaceae;g__Candidatus Koribacter;s__uncultured Acidobacteria bacterium
ASV10124	0	4	0	0	0	0	0	0	0	0	0	180.35	0	0	0	0	0	0	0	0	36.07	0.001	-15.1385	0.125007	0.349364	d__Bacteria;p__Acidobacteria;c__Acidobacteriia;o__Bryobacterales;f__Solibacteraceae;g__Candidatus Solibacter;s__Solibacter usitatus
ASV10125	0	0	0	0	0	0	0	0	4	0	0	0	0	0	0	0	0	0	185.43	0	0.001	37.086	15.1786	0.0625063	0.332325	d__Bacteria;p__Proteobacteria;c__Alphaproteobacteria;o__Hyphomicrobiales;f__Methylocystaceae;g__Methylosinus;s__Methylosinus sp000685825
ASV10126	0	0	0	0	0	0	4	0	0	0	0	0	0	0	0	0	169.03	0	0	0	0.001	33.806	15.045	0.125007	0.349364	d__Bacteria;p__Planctomycetes;c__Phycisphaerae;o__Sedimentisphaerales;f__Anaerohalosphaeraceae;g__Anaerohalosphaera;s__Anaerohalosphaera lusitana
ASV10127	0	0	0	0	0	0	4	0	0	0	0	0	0	0	0	0	169.03	0	0	0	0.001	33.806	15.045	0.125007	0.349364	d__Bacteria;p__Ignavibacteriae;c__Ignavibacteria;o__Ignavibacteriales;f__Ignavibacteriaceae;g__Ignavibacterium;s__uncultured bacterium
ASV10128	0	0	0	0	0	0	0	0	4	0	0	0	0	0	0	0	0	0	185.43	0	0.001	37.086	15.1786	0.0625063	0.332325	d__Bacteria;p__Proteobacteria;c__Betaproteobacteria;o__Rhodocyclales;f__Azonexaceae;g__Azonexus;s__Azonexus fungiphilus
ASV10129	0	4	0	0	0	0	0	0	0	0	0	180.35	0	0	0	0	0	0	0	0	36.07	0.001	-15.1385	0.125007	0.349364	d__Bacteria;p__Acidobacteria;c__Vicinamibacteria;o__norank;f__Vicinamibacteraceae;g__Luteitalea;s__Luteitalea pratensis
ASV1013	0	0	18	0	0	0	0	0	0	0	0	0	759.24	0	0	0	0	0	0	0	151.848	0.001	-17.2123	0.000488604	0.0120038	d__Bacteria;p__Bacteroidetes;c__Chitinophagia;o__Chitinophagales;f__Chitinophagaceae;g__Puia;s__uncultured bacterium
ASV10130	0	0	0	0	0	0	0	0	0	4	0	0	0	0	0	0	0	0	0	178.95	0.001	35.79	15.1273	0.250007	0.441558	d__Bacteria;p__Chloroflexi;c__norank;o__norank;f__norank;g__Thermobaculum;s__Thermobaculum terrenum
ASV10131	0	0	0	4	0	0	0	0	0	0	0	0	0	185.37	0	0	0	0	0	0	37.074	0.001	-15.1781	0.0625063	0.332325	d__Bacteria;p__Actinobacteria;c__Rubrobacteria;o__Gaiellales;f__Gaiellaceae;g__Gaiella;s__Gaiella occulta
ASV10132	0	4	0	0	0	0	0	0	0	0	0	180.35	0	0	0	0	0	0	0	0	36.07	0.001	-15.1385	0.125007	0.349364	d__Bacteria;p__Proteobacteria;c__Betaproteobacteria;o__Rhodocyclales;f__Azonexaceae;g__Dechloromonas;s__uncultured bacterium
ASV10133	0	4	0	0	0	0	0	0	0	0	0	180.35	0	0	0	0	0	0	0	0	36.07	0.001	-15.1385	0.125007	0.349364	d__Bacteria;p__Cyanobacteria;c__norank;o__Nostocales;f__Aphanizomenonaceae;g__Dolichospermum;s__Dolichospermum flosaquae
ASV10134	0	0	0	4	0	0	0	0	0	0	0	0	0	185.37	0	0	0	0	0	0	37.074	0.001	-15.1781	0.0625063	0.332325	d__Bacteria;p__Bacteroidetes;c__Chitinophagia;o__Chitinophagales;f__Chitinophagaceae;g__Edaphobaculum;s__metagenome
ASV10135	0	4	0	0	0	0	0	0	0	0	0	180.35	0	0	0	0	0	0	0	0	36.07	0.001	-15.1385	0.125007	0.349364	d__Bacteria;p__Proteobacteria;c__Alphaproteobacteria;o__Micropepsales;f__Micropepsaceae;g__Rhizomicrobium;s__Rhizomicrobium sp013149165
ASV10136	0	0	0	0	0	0	0	0	4	0	0	0	0	0	0	0	0	0	185.43	0	0.001	37.086	15.1786	0.0625063	0.332325	d__Bacteria;p__Planctomycetes;c__Phycisphaerae;o__Phycisphaerales;f__Phycisphaeraceae;g__Phycisphaera;s__uncultured bacterium
ASV10137	0	0	4	0	0	0	0	0	0	0	0	0	168.72	0	0	0	0	0	0	0	33.744	0.001	-15.0423	0.250007	0.441558	d__Bacteria;p__Proteobacteria;c__Alphaproteobacteria;o__Hyphomicrobiales;f__norank;g__Pseudorhodoplanes;s__Pseudorhodoplanes sinuspersici
ASV10138	0	0	0	0	0	0	4	0	0	0	0	0	0	0	0	0	169.03	0	0	0	0.001	33.806	15.045	0.125007	0.349364	d__Bacteria;p__Proteobacteria;c__Alphaproteobacteria;o__Hyphomicrobiales;f__Xanthobacteraceae;g__Pseudolabrys;s__uncultured bacterium
ASV10139	0	0	0	0	0	0	0	0	4	0	0	0	0	0	0	0	0	0	185.43	0	0.001	37.086	15.1786	0.0625063	0.332325	d__Bacteria;p__Acidobacteria;c__Acidobacteriia;o__Bryobacterales;f__Bryobacteraceae;g__Bryobacter;s__Bryobacter aggregatus
ASV1014	0	0	18	0	0	0	0	0	0	0	0	0	759.24	0	0	0	0	0	0	0	151.848	0.001	-17.2123	0.000488604	0.0120038	d__Bacteria;p__Acidobacteria;c__Acidobacteriia;o__Acidobacteriales;f__Acidobacteriaceae;g__Candidatus Koribacter;s__uncultured Acidobacteria bacterium
ASV10140	0	4	0	0	0	0	0	0	0	0	0	180.35	0	0	0	0	0	0	0	0	36.07	0.001	-15.1385	0.125007	0.349364	d__Bacteria;p__Bacteroidetes;c__Sphingobacteriia;o__Sphingobacteriales;f__Sphingobacteriaceae;g__Solitalea
ASV10141	0	0	0	0	0	0	0	0	0	4	0	0	0	0	0	0	0	0	0	178.95	0.001	35.79	15.1273	0.250007	0.441558	d__Bacteria;p__Acidobacteria;c__Acidobacteriia;o__Bryobacterales;f__Solibacteraceae;g__Candidatus Solibacter;s__Solibacter usitatus
ASV10142	0	0	0	0	0	4	0	0	0	0	0	0	0	0	0	221.9	0	0	0	0	0.001	44.38	15.4376	0.0625063	0.332325	d__Bacteria;p__Gemmatimonadetes;c__Gemmatimonadetes;o__Gemmatimonadales;f__Gemmatimonadaceae;g__Gemmatimonas;s__Gemmatimonas phototrophica
ASV10143	0	0	0	0	0	0	0	0	0	4	0	0	0	0	0	0	0	0	0	178.95	0.001	35.79	15.1273	0.250007	0.441558	d__Bacteria;p__Bacteroidetes;c__Chitinophagia;o__Chitinophagales;f__Chitinophagaceae;g__Parafilimonas;s__uncultured bacterium
ASV10144	4	0	0	0	0	0	0	0	0	0	177.19	0	0	0	0	0	0	0	0	0	35.438	0.001	-15.113	0.125007	0.349364	d__Bacteria;p__Planctomycetes;c__Planctomycetia;o__Gemmatales;f__Gemmataceae;g__Fimbriiglobus;s__Fimbriiglobus ruber
ASV10145	0	0	4	0	0	0	0	0	0	0	0	0	168.72	0	0	0	0	0	0	0	33.744	0.001	-15.0423	0.250007	0.441558	d__Bacteria;p__Acidobacteria;c__Acidobacteriia;o__Bryobacterales;f__Solibacteraceae;g__Candidatus Solibacter;s__Solibacter usitatus
ASV10146	0	0	0	0	0	0	0	0	0	4	0	0	0	0	0	0	0	0	0	178.95	0.001	35.79	15.1273	0.250007	0.441558	Unclassified
ASV10147	0	0	0	4	0	0	0	0	0	0	0	0	0	185.37	0	0	0	0	0	0	37.074	0.001	-15.1781	0.0625063	0.332325	d__Bacteria;p__Verrucomicrobia;c__Spartobacteria;o__Chthoniobacterales;f__Chthoniobacteraceae;g__Chthoniobacter;s__Chthoniobacter flavus
ASV10148	0	0	0	0	4	0	0	0	0	0	0	0	0	0	190.97	0	0	0	0	0	38.194	0.001	-15.2211	0.00781469	0.0892477	d__Bacteria;p__Bacteroidetes;c__Sphingobacteriia;o__Sphingobacteriales;f__Sphingobacteriaceae;g__Mucilaginibacter;s__Mucilaginibacter ginsenosidivorax
ASV10149	0	0	0	0	0	0	0	0	4	0	0	0	0	0	0	0	0	0	185.43	0	0.001	37.086	15.1786	0.0625063	0.332325	d__Bacteria;p__Proteobacteria;c__Gammaproteobacteria;o__Pseudomonadales;f__Pseudomonadaceae;g__Pseudomonas;s__Pseudomonas plecoglossicida
ASV1015	0	0	18	0	0	0	0	0	0	0	0	0	759.24	0	0	0	0	0	0	0	151.848	0.001	-17.2123	0.000488604	0.0120038	d__Bacteria;p__Proteobacteria;c__Alphaproteobacteria;o__Micropepsales;f__Micropepsaceae;g__Rhizomicrobium;s__Rhizomicrobium sp013149165
ASV10150	0	0	0	0	0	0	0	0	4	0	0	0	0	0	0	0	0	0	185.43	0	0.001	37.086	15.1786	0.0625063	0.332325	d__Bacteria;p__Acidobacteria;c__Acidobacteriia;o__Bryobacterales;f__Bryobacteraceae;g__Bryobacter;s__Bryobacter aggregatus
ASV10151	0	4	0	0	0	0	0	0	0	0	0	180.35	0	0	0	0	0	0	0	0	36.07	0.001	-15.1385	0.125007	0.349364	d__Bacteria;p__Bacteroidetes;c__Chitinophagia;o__Chitinophagales;f__Chitinophagaceae;g__Puia;s__uncultured bacterium
ASV10152	0	0	0	0	0	0	0	0	0	4	0	0	0	0	0	0	0	0	0	178.95	0.001	35.79	15.1273	0.250007	0.441558	d__Bacteria;p__Proteobacteria;c__Deltaproteobacteria;o__Desulfuromonadales;f__Geobacteraceae;g__Geobacter;s__uncultured bacterium
ASV10153	0	4	0	0	0	0	0	0	0	0	0	180.35	0	0	0	0	0	0	0	0	36.07	0.001	-15.1385	0.125007	0.349364	d__Bacteria;p__Proteobacteria;c__Oligoflexia;o__Bdellovibrionales;f__Bdellovibrionaceae;g__Bdellovibrio;s__Bdellovibrio bacteriovorus
ASV10154	0	0	0	0	0	0	0	0	4	0	0	0	0	0	0	0	0	0	185.43	0	0.001	37.086	15.1786	0.0625063	0.332325	d__Bacteria;p__Proteobacteria;c__Alphaproteobacteria;o__Hyphomicrobiales;f__Devosiaceae;g__Pelagibacterium;s__Pelagibacterium montanilacus
ASV10155	0	0	0	0	0	4	0	0	0	0	0	0	0	0	0	221.9	0	0	0	0	0.001	44.38	15.4376	0.0625063	0.332325	Unclassified
ASV10156	0	0	0	0	0	0	0	0	4	0	0	0	0	0	0	0	0	0	185.43	0	0.001	37.086	15.1786	0.0625063	0.332325	d__Bacteria;p__Proteobacteria;c__Betaproteobacteria;o__Rhodocyclales;f__Azonexaceae;g__Azonexus;s__Azonexus sp009469585
ASV10157	4	0	0	0	0	0	0	0	0	0	177.19	0	0	0	0	0	0	0	0	0	35.438	0.001	-15.113	0.125007	0.349364	d__Bacteria;p__Proteobacteria;c__Deltaproteobacteria;o__Desulfuromonadales;f__Geobacteraceae;g__Geobacter;s__Geobacter pickeringii
ASV10158	0	0	0	0	0	0	0	0	0	4	0	0	0	0	0	0	0	0	0	178.95	0.001	35.79	15.1273	0.250007	0.441558	d__Bacteria;p__Verrucomicrobia;c__Spartobacteria;o__norank;f__norank;g__Candidatus Xiphinematobacter;s__uncultured bacterium
ASV10159	4	0	0	0	0	0	0	0	0	0	177.19	0	0	0	0	0	0	0	0	0	35.438	0.001	-15.113	0.125007	0.349364	d__Bacteria;p__Acidobacteria;c__Acidobacteriia;o__Acidobacteriales;f__Acidobacteriaceae;g__Candidatus Koribacter;s__uncultured bacterium
ASV1016	0	0	0	0	0	0	0	0	0	18	0	0	0	0	0	0	0	0	0	805.26	0.001	161.052	17.2972	0.000122181	0.00397117	d__Bacteria;p__Proteobacteria;c__Betaproteobacteria;o__Neisseriales;f__Chromobacteriaceae;g__Aquitalea;s__Aquitalea denitrificans
ASV10160	0	0	0	4	0	0	0	0	0	0	0	0	0	185.37	0	0	0	0	0	0	37.074	0.001	-15.1781	0.0625063	0.332325	d__Bacteria;p__Proteobacteria;c__Deltaproteobacteria;o__Myxococcales;f__Sandaracinaceae;g__Sandaracinus;s__Sandaracinus amylolyticus
ASV10161	4	0	0	0	0	0	0	0	0	0	177.19	0	0	0	0	0	0	0	0	0	35.438	0.001	-15.113	0.125007	0.349364	d__Bacteria;p__Bacteroidetes;c__Sphingobacteriia;o__Sphingobacteriales;f__Sphingobacteriaceae;g__Mucilaginibacter;s__Mucilaginibacter gossypii
ASV10162	0	0	0	0	0	0	0	0	4	0	0	0	0	0	0	0	0	0	185.43	0	0.001	37.086	15.1786	0.0625063	0.332325	d__Bacteria;p__Proteobacteria;c__Betaproteobacteria;o__Burkholderiales;f__Oxalobacteraceae;g__Massilia;s__uncultured bacterium
ASV10163	4	0	0	0	0	0	0	0	0	0	177.19	0	0	0	0	0	0	0	0	0	35.438	0.001	-15.113	0.125007	0.349364	d__Bacteria;p__Acidobacteria;c__Acidobacteriia;o__Acidobacteriales;f__Acidobacteriaceae;g__Silvibacterium;s__Silvibacterium dinghuense
ASV10164	0	0	0	0	0	0	0	0	0	4	0	0	0	0	0	0	0	0	0	178.95	0.001	35.79	15.1273	0.250007	0.441558	d__Bacteria;p__Gemmatimonadetes;c__Gemmatimonadetes;o__Gemmatimonadales;f__Gemmatimonadaceae;g__Gemmatirosa;s__Gemmatirosa kalamazoonesis
ASV10165	4	0	0	0	0	0	0	0	0	0	177.19	0	0	0	0	0	0	0	0	0	35.438	0.001	-15.113	0.125007	0.349364	d__Bacteria;p__Candidatus Saccharibacteria;c__norank;o__norank;f__norank;g__Candidatus Saccharimonas;s__Saccharimonas aalborgensis
ASV10166	0	4	0	0	0	0	0	0	0	0	0	180.35	0	0	0	0	0	0	0	0	36.07	0.001	-15.1385	0.125007	0.349364	d__Bacteria;p__Spirochaetes;c__Spirochaetia;o__Spirochaetales;f__Spirochaetaceae;g__Alkalispirochaeta
ASV10167	0	0	0	0	0	4	0	0	0	0	0	0	0	0	0	221.9	0	0	0	0	0.001	44.38	15.4376	0.0625063	0.332325	d__Bacteria;p__Fibrobacteres;c__Fibrobacteria;o__Fibrobacterales;f__Fibrobacteraceae;g__Fibrobacter;s__Fibrobacter sp003149045
ASV10168	0	0	0	0	4	0	0	0	0	0	0	0	0	0	190.97	0	0	0	0	0	38.194	0.001	-15.2211	0.00781469	0.0892477	d__Bacteria;p__Proteobacteria;c__Alphaproteobacteria;o__Hyphomicrobiales
ASV10169	0	0	0	0	0	0	0	0	4	0	0	0	0	0	0	0	0	0	185.43	0	0.001	37.086	15.1786	0.0625063	0.332325	d__Bacteria;p__Proteobacteria;c__Betaproteobacteria;o__Burkholderiales;f__Comamonadaceae;g__Variovorax;s__Variovorax sp003019815
ASV1017	0	0	0	0	0	0	0	0	18	0	0	0	0	0	0	0	0	0	834.45	0	0.001	166.89	17.3485	9.55679e-07	6.34793e-05	Unclassified
ASV10170	0	0	0	0	0	0	4	0	0	0	0	0	0	0	0	0	169.03	0	0	0	0.001	33.806	15.045	0.125007	0.349364	d__Bacteria;p__Proteobacteria;c__Alphaproteobacteria;o__Rhodospirillales;f__Acetobacteraceae;g__Acidisphaera
ASV10171	0	0	4	0	0	0	0	0	0	0	0	0	168.72	0	0	0	0	0	0	0	33.744	0.001	-15.0423	0.250007	0.441558	d__Bacteria;p__Planctomycetes;c__Planctomycetia;o__Isosphaerales;f__Isosphaeraceae;g__Paludisphaera;s__Paludisphaera sp001610895
ASV10172	0	0	0	0	4	0	0	0	0	0	0	0	0	0	190.97	0	0	0	0	0	38.194	0.001	-15.2211	0.00781469	0.0892477	d__Bacteria;p__Bacteroidetes;c__Chitinophagia;o__Chitinophagales;f__Chitinophagaceae;g__Hydrotalea;s__Hydrotalea flava
ASV10173	0	0	0	0	0	0	4	0	0	0	0	0	0	0	0	0	169.03	0	0	0	0.001	33.806	15.045	0.125007	0.349364	d__Bacteria;p__Cyanobacteria;c__norank;o__Nostocales;f__Aphanizomenonaceae;g__Dolichospermum;s__Dolichospermum flosaquae
ASV10174	0	0	4	0	0	0	0	0	0	0	0	0	168.72	0	0	0	0	0	0	0	33.744	0.001	-15.0423	0.250007	0.441558	d__Bacteria;p__Proteobacteria;c__Alphaproteobacteria;o__Hyphomicrobiales;f__Phyllobacteriaceae;g__Mesorhizobium;s__Mesorhizobium ciceri
ASV10175	4	0	0	0	0	0	0	0	0	0	177.19	0	0	0	0	0	0	0	0	0	35.438	0.001	-15.113	0.125007	0.349364	d__Bacteria;p__Proteobacteria;c__Gammaproteobacteria;o__Pseudomonadales;f__Pseudomonadaceae;g__Pseudomonas
ASV10176	0	0	0	0	0	0	4	0	0	0	0	0	0	0	0	0	169.03	0	0	0	0.001	33.806	15.045	0.125007	0.349364	d__Bacteria;p__Actinobacteria;c__Rubrobacteria;o__Gaiellales;f__Gaiellaceae;g__Gaiella;s__uncultured bacterium
ASV10177	0	4	0	0	0	0	0	0	0	0	0	180.35	0	0	0	0	0	0	0	0	36.07	0.001	-15.1385	0.125007	0.349364	d__Bacteria;p__Bacteroidetes;c__Sphingobacteriia;o__Sphingobacteriales;f__Sphingobacteriaceae;g__Solitalea;s__uncultured bacterium
ASV10178	0	0	0	4	0	0	0	0	0	0	0	0	0	185.37	0	0	0	0	0	0	37.074	0.001	-15.1781	0.0625063	0.332325	d__Bacteria;p__Planctomycetes;c__Planctomycetia;o__Pirellulales;f__Pirellulaceae;g__Rhodopirellula;s__uncultured bacterium
ASV10179	0	0	0	0	0	0	4	0	0	0	0	0	0	0	0	0	169.03	0	0	0	0.001	33.806	15.045	0.125007	0.349364	d__Bacteria;p__Planctomycetes;c__Planctomycetia;o__Planctomycetales;f__Planctomycetaceae;g__Gimesia;s__Gimesia maris
ASV1018	0	0	0	0	0	0	18	0	0	0	0	0	0	0	0	0	760.65	0	0	0	0.001	152.13	17.2149	3.82122e-06	0.000205887	d__Bacteria;p__Proteobacteria;c__Alphaproteobacteria;o__Hyphomicrobiales;f__Hyphomicrobiaceae;g__Methyloceanibacter;s__uncultured bacterium
ASV10180	0	0	0	0	0	0	0	0	0	4	0	0	0	0	0	0	0	0	0	178.95	0.001	35.79	15.1273	0.250007	0.441558	d__Bacteria;p__Verrucomicrobia;c__Verrucomicrobiae;o__Verrucomicrobiales;f__Verrucomicrobia subdivision 3;g__Pedosphaera;s__uncultured Verrucomicrobia bacterium
ASV10181	0	0	0	0	0	0	0	0	4	0	0	0	0	0	0	0	0	0	185.43	0	0.001	37.086	15.1786	0.0625063	0.332325	d__Bacteria;p__Proteobacteria;c__Alphaproteobacteria;o__Hyphomicrobiales;f__Xanthobacteraceae;g__Pseudolabrys;s__uncultured bacterium
ASV10182	0	4	0	0	0	0	0	0	0	0	0	180.35	0	0	0	0	0	0	0	0	36.07	0.001	-15.1385	0.125007	0.349364	d__Bacteria;p__Proteobacteria;c__Betaproteobacteria;o__Burkholderiales;f__Oxalobacteraceae;g__Duganella;s__Duganella sp003217375
ASV10183	0	0	0	0	0	0	4	0	0	0	0	0	0	0	0	0	169.03	0	0	0	0.001	33.806	15.045	0.125007	0.349364	d__Bacteria;p__Proteobacteria;c__Betaproteobacteria;o__Burkholderiales;f__Comamonadaceae;g__Pelomonas;s__Pelomonas saccharophila
ASV10184	0	4	0	0	0	0	0	0	0	0	0	180.35	0	0	0	0	0	0	0	0	36.07	0.001	-15.1385	0.125007	0.349364	d__Bacteria;p__Actinobacteria;c__Rubrobacteria;o__Gaiellales;f__Gaiellaceae;g__Gaiella;s__Gaiella occulta
ASV10185	0	0	0	0	4	0	0	0	0	0	0	0	0	0	190.97	0	0	0	0	0	38.194	0.001	-15.2211	0.00781469	0.0892477	d__Bacteria;p__Bacteroidetes;c__Chitinophagia;o__Chitinophagales;f__Chitinophagaceae;g__Terrimonas;s__Terrimonas ferruginea
ASV10186	0	0	4	0	0	0	0	0	0	0	0	0	168.72	0	0	0	0	0	0	0	33.744	0.001	-15.0423	0.250007	0.441558	d__Bacteria;p__Proteobacteria;c__Alphaproteobacteria;o__Rhodospirillales;f__Stellaceae;g__Stella;s__Stella humosa
ASV10187	0	0	0	0	0	0	0	0	0	4	0	0	0	0	0	0	0	0	0	178.95	0.001	35.79	15.1273	0.250007	0.441558	d__Bacteria;p__Acidobacteria;c__Vicinamibacteria;o__norank;f__Vicinamibacteraceae;g__Luteitalea;s__Luteitalea pratensis
ASV10188	0	0	0	4	0	0	0	0	0	0	0	0	0	185.37	0	0	0	0	0	0	37.074	0.001	-15.1781	0.0625063	0.332325	d__Bacteria;p__Acidobacteria;c__Acidobacteriia;o__Acidobacteriales;f__Acidobacteriaceae;g__Candidatus Koribacter;s__Koribacter versatilis
ASV10189	0	0	0	4	0	0	0	0	0	0	0	0	0	185.37	0	0	0	0	0	0	37.074	0.001	-15.1781	0.0625063	0.332325	d__Bacteria;p__Planctomycetes;c__Planctomycetia;o__Pirellulales;f__Pirellulaceae;g__Blastopirellula;s__Blastopirellula retiformator
ASV1019	0	0	0	0	0	0	18	0	0	0	0	0	0	0	0	0	760.65	0	0	0	0.001	152.13	17.2149	3.82122e-06	0.000205887	d__Bacteria;p__Proteobacteria;c__Gammaproteobacteria;o__Chromatiales;f__Woeseiaceae;g__Woeseia;s__uncultured gamma proteobacterium
ASV10190	0	0	0	0	4	0	0	0	0	0	0	0	0	0	190.97	0	0	0	0	0	38.194	0.001	-15.2211	0.00781469	0.0892477	Unclassified
ASV10191	0	0	0	4	0	0	0	0	0	0	0	0	0	185.37	0	0	0	0	0	0	37.074	0.001	-15.1781	0.0625063	0.332325	d__Bacteria;p__Firmicutes;c__Negativicutes;o__Selenomonadales;f__Sporomusaceae;g__Thermosinus;s__Thermosinus carboxydivorans
ASV10192	4	0	0	0	0	0	0	0	0	0	177.19	0	0	0	0	0	0	0	0	0	35.438	0.001	-15.113	0.125007	0.349364	d__Bacteria;p__Proteobacteria;c__Alphaproteobacteria;o__Hyphomicrobiales;f__Roseiarcaceae;g__Roseiarcus;s__uncultured bacterium
ASV10193	0	0	0	0	4	0	0	0	0	0	0	0	0	0	190.97	0	0	0	0	0	38.194	0.001	-15.2211	0.00781469	0.0892477	d__Bacteria;p__Actinobacteria;c__Rubrobacteria;o__Gaiellales;f__Gaiellaceae;g__Gaiella;s__Gaiella occulta
ASV10194	4	0	0	0	0	0	0	0	0	0	177.19	0	0	0	0	0	0	0	0	0	35.438	0.001	-15.113	0.125007	0.349364	d__Bacteria;p__Proteobacteria;c__Alphaproteobacteria;o__Hyphomicrobiales;f__norank;g__Pseudorhodoplanes;s__Pseudorhodoplanes sinuspersici
ASV10195	0	0	0	0	0	0	0	0	0	4	0	0	0	0	0	0	0	0	0	178.95	0.001	35.79	15.1273	0.250007	0.441558	d__Bacteria;p__Proteobacteria;c__Alphaproteobacteria;o__Hyphomicrobiales;f__Reyranellaceae;g__Reyranella;s__metagenome
ASV10196	0	0	0	0	0	0	0	0	0	4	0	0	0	0	0	0	0	0	0	178.95	0.001	35.79	15.1273	0.250007	0.441558	d__Bacteria;p__Proteobacteria;c__Deltaproteobacteria;o__Myxococcales;f__Polyangiaceae;g__Polyangium
ASV10197	0	0	0	0	0	0	0	0	4	0	0	0	0	0	0	0	0	0	185.43	0	0.001	37.086	15.1786	0.0625063	0.332325	d__Bacteria;p__Acidobacteria;c__Acidobacteriia;o__Acidobacteriales;f__Acidobacteriaceae;g__Terracidiphilus;s__Terracidiphilus sp903849645
ASV10198	0	0	0	0	0	4	0	0	0	0	0	0	0	0	0	221.9	0	0	0	0	0.001	44.38	15.4376	0.0625063	0.332325	d__Bacteria;p__Chloroflexi;c__Anaerolineae;o__Anaerolineales;f__Anaerolineaceae;g__Ornatilinea;s__Ornatilinea apprima
ASV10199	0	0	0	0	0	0	0	0	0	4	0	0	0	0	0	0	0	0	0	178.95	0.001	35.79	15.1273	0.250007	0.441558	d__Bacteria;p__Acidobacteria;c__Vicinamibacteria;o__norank;f__Vicinamibacteraceae;g__Luteitalea;s__Luteitalea pratensis
ASV102	0	0	0	75	0	0	0	0	0	0	0	0	0	3475.76	0	0	0	0	0	0	695.152	0.001	-19.407	1.70743e-24	1.09924e-21	d__Bacteria;p__Proteobacteria;c__Betaproteobacteria;o__Burkholderiales;f__Oxalobacteraceae;g__Herbaspirillum;s__Herbaspirillum sp002257565
ASV1020	0	0	0	18	0	0	0	0	0	0	0	0	0	834.18	0	0	0	0	0	0	166.836	0.001	-17.3481	3.82122e-06	0.000205887	d__Bacteria;p__Elusimicrobia;c__Endomicrobia;o__Endomicrobiales;f__Endomicrobiaceae;g__Endomicrobium;s__Endomicrobium proavitum
ASV10200	0	4	0	0	0	0	0	0	0	0	0	180.35	0	0	0	0	0	0	0	0	36.07	0.001	-15.1385	0.125007	0.349364	d__Bacteria;p__Actinobacteria;c__Thermoleophilia;o__Solirubrobacterales;f__Conexibacteraceae;g__Conexibacter
ASV10201	0	0	0	0	0	4	0	0	0	0	0	0	0	0	0	221.9	0	0	0	0	0.001	44.38	15.4376	0.0625063	0.332325	d__Bacteria;p__Planctomycetes;c__Planctomycetia;o__Gemmatales;f__Gemmataceae;g__Fimbriiglobus;s__Fimbriiglobus ruber
ASV10202	0	0	0	0	4	0	0	0	0	0	0	0	0	0	190.97	0	0	0	0	0	38.194	0.001	-15.2211	0.00781469	0.0892477	d__Bacteria;p__Bacteroidetes;c__Chitinophagia;o__Chitinophagales;f__Chitinophagaceae;g__Puia
ASV10203	0	0	0	0	0	0	0	0	0	4	0	0	0	0	0	0	0	0	0	178.95	0.001	35.79	15.1273	0.250007	0.441558	d__Bacteria;p__Fibrobacteres;c__Fibrobacteria;o__Fibrobacterales;f__Fibrobacteraceae;g__Fibrobacter
ASV10204	4	0	0	0	0	0	0	0	0	0	177.19	0	0	0	0	0	0	0	0	0	35.438	0.001	-15.113	0.125007	0.349364	d__Bacteria;p__Proteobacteria;c__Gammaproteobacteria;o__Legionellales;f__Coxiellaceae;g__Aquicella;s__Aquicella lusitana
ASV10205	0	0	0	0	4	0	0	0	0	0	0	0	0	0	190.97	0	0	0	0	0	38.194	0.001	-15.2211	0.00781469	0.0892477	d__Bacteria;p__Proteobacteria;c__Oligoflexia;o__Bdellovibrionales;f__Bdellovibrionaceae;g__Bdellovibrio;s__Bdellovibrio bacteriovorus
ASV10206	0	0	0	0	4	0	0	0	0	0	0	0	0	0	190.97	0	0	0	0	0	38.194	0.001	-15.2211	0.00781469	0.0892477	d__Bacteria;p__Proteobacteria;c__Gammaproteobacteria;o__Xanthomonadales;f__Xanthomonadaceae;g__Lysobacter;s__Lysobacter sp003367355
ASV10207	0	0	0	0	0	0	0	0	4	0	0	0	0	0	0	0	0	0	185.43	0	0.001	37.086	15.1786	0.0625063	0.332325	d__Bacteria;p__Proteobacteria;c__Deltaproteobacteria;o__Myxococcales;f__Labilitrichaceae;g__Labilithrix;s__Labilithrix luteola
ASV10208	0	0	0	4	0	0	0	0	0	0	0	0	0	185.37	0	0	0	0	0	0	37.074	0.001	-15.1781	0.0625063	0.332325	d__Bacteria;p__Acidobacteria;c__Blastocatellia;o__Blastocatellales;f__Blastocatellaceae;g__Stenotrophobacter;s__uncultured bacterium
ASV10209	0	0	0	0	0	0	0	0	4	0	0	0	0	0	0	0	0	0	185.43	0	0.001	37.086	15.1786	0.0625063	0.332325	d__Bacteria;p__Proteobacteria;c__Alphaproteobacteria;o__Hyphomicrobiales;f__norank;g__Pseudorhodoplanes;s__Pseudorhodoplanes sinuspersici
ASV1021	0	15	0	3	0	0	0	0	0	0	0	676.32	0	139.03	0	0	0	0	0	0	163.07	0.001	-17.3151	3.82122e-06	0.000205887	d__Bacteria;p__Bacteroidetes;c__Flavobacteriia;o__Flavobacteriales;f__Crocinitomicaceae;g__Fluviicola;s__Fluviicola sp003856375
ASV10210	0	4	0	0	0	0	0	0	0	0	0	180.35	0	0	0	0	0	0	0	0	36.07	0.001	-15.1385	0.125007	0.349364	d__Bacteria;p__Acidobacteria;c__Acidobacteriia;o__Acidobacteriales;f__Acidobacteriaceae;g__Candidatus Koribacter;s__uncultured Acidobacteria bacterium
ASV10211	0	0	4	0	0	0	0	0	0	0	0	0	168.72	0	0	0	0	0	0	0	33.744	0.001	-15.0423	0.250007	0.441558	d__Bacteria;p__Proteobacteria;c__Betaproteobacteria;o__Burkholderiales;f__Burkholderiaceae;g__Paraburkholderia;s__Paraburkholderia fungorum
ASV10212	0	0	0	0	4	0	0	0	0	0	0	0	0	0	190.97	0	0	0	0	0	38.194	0.001	-15.2211	0.00781469	0.0892477	d__Bacteria;p__Acidobacteria;c__Acidobacteriia;o__Acidobacteriales;f__Acidobacteriaceae;g__Candidatus Koribacter;s__uncultured Acidobacteria bacterium
ASV10213	0	0	0	0	0	4	0	0	0	0	0	0	0	0	0	221.9	0	0	0	0	0.001	44.38	15.4376	0.0625063	0.332325	d__Bacteria;p__Planctomycetes;c__Planctomycetia;o__Gemmatales;f__Gemmataceae;g__Limnoglobus;s__Limnoglobus roseus
ASV10214	0	0	0	0	4	0	0	0	0	0	0	0	0	0	190.97	0	0	0	0	0	38.194	0.001	-15.2211	0.00781469	0.0892477	d__Bacteria;p__Proteobacteria;c__Alphaproteobacteria;o__Hyphomicrobiales;f__Bradyrhizobiaceae;g__Bradyrhizobium;s__Bradyrhizobium nanningense
ASV10215	0	0	0	0	0	0	0	0	4	0	0	0	0	0	0	0	0	0	185.43	0	0.001	37.086	15.1786	0.0625063	0.332325	d__Bacteria;p__Acidobacteria;c__Acidobacteriia;o__Acidobacteriales;f__Acidobacteriaceae;g__Candidatus Koribacter;s__uncultured bacterium
ASV10216	0	4	0	0	0	0	0	0	0	0	0	180.35	0	0	0	0	0	0	0	0	36.07	0.001	-15.1385	0.125007	0.349364	d__Bacteria;p__Planctomycetes;c__Phycisphaerae;o__Sedimentisphaerales;f__Anaerohalosphaeraceae;g__Anaerohalosphaera;s__Anaerohalosphaera lusitana
ASV10217	0	0	0	0	0	0	4	0	0	0	0	0	0	0	0	0	169.03	0	0	0	0.001	33.806	15.045	0.125007	0.349364	d__Bacteria;p__Proteobacteria;c__Deltaproteobacteria;o__Myxococcales;f__Myxococcaceae;g__Myxococcus;s__Myxococcus fulvus
ASV10218	0	0	4	0	0	0	0	0	0	0	0	0	168.72	0	0	0	0	0	0	0	33.744	0.001	-15.0423	0.250007	0.441558	d__Bacteria;p__Chloroflexi;c__Ktedonobacteria;o__Ktedonobacterales;f__Ktedonobacteraceae;g__Ktedonobacter;s__Ktedonobacter racemifer
ASV10219	0	0	0	0	0	0	0	0	4	0	0	0	0	0	0	0	0	0	185.43	0	0.001	37.086	15.1786	0.0625063	0.332325	d__Bacteria;p__Nitrospirae;c__Nitrospira;o__Nitrospirales;f__Nitrospiraceae;g__Candidatus Manganitrophus;s__Manganitrophus noduliformans
ASV1022	0	0	0	18	0	0	0	0	0	0	0	0	0	834.18	0	0	0	0	0	0	166.836	0.001	-17.3481	3.82122e-06	0.000205887	Unclassified
ASV10220	4	0	0	0	0	0	0	0	0	0	177.19	0	0	0	0	0	0	0	0	0	35.438	0.001	-15.113	0.125007	0.349364	d__Bacteria;p__Bacteroidetes;c__Sphingobacteriia;o__Sphingobacteriales;f__Sphingobacteriaceae;g__Mucilaginibacter;s__Mucilaginibacter sp013283875
ASV10221	4	0	0	0	0	0	0	0	0	0	177.19	0	0	0	0	0	0	0	0	0	35.438	0.001	-15.113	0.125007	0.349364	d__Bacteria;p__Proteobacteria;c__Betaproteobacteria;o__Burkholderiales;f__norank;g__Rhizobacter;s__Rhizobacter sp001425825
ASV10222	0	0	4	0	0	0	0	0	0	0	0	0	168.72	0	0	0	0	0	0	0	33.744	0.001	-15.0423	0.250007	0.441558	d__Bacteria;p__Proteobacteria;c__Deltaproteobacteria;o__Myxococcales;f__Labilitrichaceae;g__Labilithrix;s__Labilithrix luteola
ASV10223	0	0	4	0	0	0	0	0	0	0	0	0	168.72	0	0	0	0	0	0	0	33.744	0.001	-15.0423	0.250007	0.441558	d__Bacteria;p__Acidobacteria;c__Acidobacteriia;o__Acidobacteriales;f__Acidobacteriaceae;g__Silvibacterium;s__Silvibacterium bohemicum
ASV10224	0	4	0	0	0	0	0	0	0	0	0	180.35	0	0	0	0	0	0	0	0	36.07	0.001	-15.1385	0.125007	0.349364	d__Bacteria;p__Proteobacteria;c__Alphaproteobacteria;o__Hyphomicrobiales;f__Methylobacteriaceae;g__Methylobacterium;s__Methylobacterium organophilum
ASV10225	0	0	0	0	4	0	0	0	0	0	0	0	0	0	190.97	0	0	0	0	0	38.194	0.001	-15.2211	0.00781469	0.0892477	d__Bacteria;p__Armatimonadetes;c__Chthonomonadetes;o__Chthonomonadales;f__Chthonomonadaceae;g__Chthonomonas;s__Chthonomonas calidirosea
ASV10226	0	0	0	0	0	0	0	0	0	4	0	0	0	0	0	0	0	0	0	178.95	0.001	35.79	15.1273	0.250007	0.441558	d__Bacteria;p__Proteobacteria;c__Betaproteobacteria;o__Burkholderiales;f__norank;g__Tepidimonas;s__Tepidimonas charontis
ASV10227	0	4	0	0	0	0	0	0	0	0	0	180.35	0	0	0	0	0	0	0	0	36.07	0.001	-15.1385	0.125007	0.349364	d__Bacteria;p__Proteobacteria;c__Deltaproteobacteria;o__Myxococcales;f__Sandaracinaceae;g__Sandaracinus;s__Sandaracinus amylolyticus
ASV10228	0	0	0	0	0	4	0	0	0	0	0	0	0	0	0	221.9	0	0	0	0	0.001	44.38	15.4376	0.0625063	0.332325	d__Bacteria;p__Planctomycetes;c__Planctomycetia;o__Isosphaerales;f__Isosphaeraceae;g__Singulisphaera;s__Singulisphaera sp900129635
ASV10229	0	0	0	0	0	0	0	0	4	0	0	0	0	0	0	0	0	0	185.43	0	0.001	37.086	15.1786	0.0625063	0.332325	d__Bacteria;p__Acidobacteria;c__Acidobacteriia;o__Acidobacteriales;f__Acidobacteriaceae;g__Candidatus Koribacter;s__uncultured bacterium
ASV1023	0	0	0	0	0	0	0	0	0	18	0	0	0	0	0	0	0	0	0	805.26	0.001	161.052	17.2972	0.000122181	0.00397117	d__Bacteria;p__Proteobacteria;c__Alphaproteobacteria;o__Hyphomicrobiales;f__norank;g__Pseudorhodoplanes;s__Pseudorhodoplanes sinuspersici
ASV10230	0	4	0	0	0	0	0	0	0	0	0	180.35	0	0	0	0	0	0	0	0	36.07	0.001	-15.1385	0.125007	0.349364	d__Bacteria;p__Proteobacteria;c__Alphaproteobacteria;o__Hyphomicrobiales;f__Bradyrhizobiaceae;g__Bradyrhizobium;s__Bradyrhizobium valentinum
ASV10231	0	0	0	0	0	4	0	0	0	0	0	0	0	0	0	221.9	0	0	0	0	0.001	44.38	15.4376	0.0625063	0.332325	d__Bacteria;p__Acidobacteria;c__Acidobacteriia;o__Bryobacterales;f__Solibacteraceae;g__Candidatus Solibacter;s__Solibacter usitatus
ASV10232	4	0	0	0	0	0	0	0	0	0	177.19	0	0	0	0	0	0	0	0	0	35.438	0.001	-15.113	0.125007	0.349364	d__Bacteria;p__Acidobacteria;c__Acidobacteriia;o__Acidobacteriales;f__Acidobacteriaceae;g__Terracidiphilus;s__Terracidiphilus sp903849645
ASV10233	0	0	0	0	0	0	0	0	4	0	0	0	0	0	0	0	0	0	185.43	0	0.001	37.086	15.1786	0.0625063	0.332325	d__Bacteria;p__Actinobacteria;c__Acidimicrobiia;o__Acidimicrobiales;f__Acidimicrobiaceae;g__Acidimicrobium;s__Acidimicrobium ferrooxidans
ASV10234	0	0	0	0	0	0	0	0	4	0	0	0	0	0	0	0	0	0	185.43	0	0.001	37.086	15.1786	0.0625063	0.332325	d__Bacteria;p__Proteobacteria;c__Betaproteobacteria;o__Neisseriales;f__Chromobacteriaceae;g__Vogesella;s__Vogesella indigofera
ASV10235	0	0	4	0	0	0	0	0	0	0	0	0	168.72	0	0	0	0	0	0	0	33.744	0.001	-15.0423	0.250007	0.441558	d__Bacteria;p__Acidobacteria;c__Acidobacteriia;o__Acidobacteriales;f__Acidobacteriaceae;g__Edaphobacter;s__uncultured bacterium
ASV10236	4	0	0	0	0	0	0	0	0	0	177.19	0	0	0	0	0	0	0	0	0	35.438	0.001	-15.113	0.125007	0.349364	d__Bacteria;p__Bacteroidetes;c__Chitinophagia;o__Chitinophagales;f__Chitinophagaceae;g__Puia;s__uncultured bacterium
ASV10237	0	0	0	4	0	0	0	0	0	0	0	0	0	185.37	0	0	0	0	0	0	37.074	0.001	-15.1781	0.0625063	0.332325	d__Bacteria;p__Proteobacteria;c__Deltaproteobacteria;o__Myxococcales;f__Archangiaceae;g__Stigmatella;s__Stigmatella aurantiaca_A
ASV10238	4	0	0	0	0	0	0	0	0	0	177.19	0	0	0	0	0	0	0	0	0	35.438	0.001	-15.113	0.125007	0.349364	d__Bacteria;p__Proteobacteria;c__Alphaproteobacteria;o__Hyphomicrobiales;f__Hyphomicrobiaceae;g__Rhodoplanes;s__uncultured bacterium
ASV10239	0	0	0	0	0	0	0	0	0	4	0	0	0	0	0	0	0	0	0	178.95	0.001	35.79	15.1273	0.250007	0.441558	d__Bacteria;p__Planctomycetes;c__Planctomycetia;o__Isosphaerales;f__Isosphaeraceae;g__Aquisphaera;s__Aquisphaera giovannonii
ASV1024	0	0	0	0	0	18	0	0	0	0	0	0	0	0	0	998.56	0	0	0	0	0.001	199.712	17.6076	9.55679e-07	6.34793e-05	d__Bacteria;p__Acidobacteria;c__Blastocatellia;o__Blastocatellales;f__Blastocatellaceae;g__Stenotrophobacter;s__uncultured bacterium
ASV10240	0	0	0	0	0	0	0	0	0	4	0	0	0	0	0	0	0	0	0	178.95	0.001	35.79	15.1273	0.250007	0.441558	d__Bacteria;p__Firmicutes;c__Clostridia;o__Eubacteriales;f__Peptococcaceae;g__Desulfitobacterium;s__Desulfitobacterium hafniense
ASV10241	0	0	0	0	0	0	4	0	0	0	0	0	0	0	0	0	169.03	0	0	0	0.001	33.806	15.045	0.125007	0.349364	d__Bacteria;p__Cyanobacteria;c__norank;o__Nostocales;f__Aphanizomenonaceae;g__Dolichospermum;s__Dolichospermum flosaquae
ASV10242	4	0	0	0	0	0	0	0	0	0	177.19	0	0	0	0	0	0	0	0	0	35.438	0.001	-15.113	0.125007	0.349364	d__Bacteria;p__Proteobacteria;c__Gammaproteobacteria;o__norank;f__norank;g__Acidibacter;s__uncultured bacterium
ASV10243	4	0	0	0	0	0	0	0	0	0	177.19	0	0	0	0	0	0	0	0	0	35.438	0.001	-15.113	0.125007	0.349364	d__Bacteria;p__Proteobacteria;c__Gammaproteobacteria;o__Enterobacterales;f__Enterobacteriaceae;g__Escherichia;s__Escherichia coli
ASV10244	0	0	0	0	0	0	0	0	4	0	0	0	0	0	0	0	0	0	185.43	0	0.001	37.086	15.1786	0.0625063	0.332325	d__Bacteria;p__Proteobacteria;c__Gammaproteobacteria;o__Pseudomonadales;f__Pseudomonadaceae;g__Pseudomonas;s__Pseudomonas putida
ASV10245	0	0	0	0	0	4	0	0	0	0	0	0	0	0	0	221.9	0	0	0	0	0.001	44.38	15.4376	0.0625063	0.332325	d__Bacteria;p__Acidobacteria;c__Acidobacteriia;o__Bryobacterales;f__Solibacteraceae;g__Candidatus Solibacter;s__Solibacter usitatus
ASV10246	0	4	0	0	0	0	0	0	0	0	0	180.35	0	0	0	0	0	0	0	0	36.07	0.001	-15.1385	0.125007	0.349364	d__Bacteria;p__Proteobacteria;c__Alphaproteobacteria;o__Rhodospirillales;f__Acetobacteraceae;g__Granulibacter;s__Granulibacter bethesdensis
ASV10247	0	0	0	0	0	0	0	0	0	4	0	0	0	0	0	0	0	0	0	178.95	0.001	35.79	15.1273	0.250007	0.441558	d__Bacteria;p__Proteobacteria;c__Alphaproteobacteria;o__Rhodospirillales;f__Stellaceae;g__Stella;s__Stella sp006738865
ASV10248	0	0	4	0	0	0	0	0	0	0	0	0	168.72	0	0	0	0	0	0	0	33.744	0.001	-15.0423	0.250007	0.441558	d__Bacteria;p__Proteobacteria;c__Betaproteobacteria;o__Neisseriales;f__Neisseriaceae;g__Rivicola;s__Rivicola sp002002905
ASV10249	0	0	4	0	0	0	0	0	0	0	0	0	168.72	0	0	0	0	0	0	0	33.744	0.001	-15.0423	0.250007	0.441558	d__Bacteria;p__Proteobacteria;c__Betaproteobacteria;o__Burkholderiales;f__Oxalobacteraceae;g__Collimonas;s__Collimonas arenae_A
ASV1025	0	0	0	0	0	0	18	0	0	0	0	0	0	0	0	0	760.65	0	0	0	0.001	152.13	17.2149	3.82122e-06	0.000205887	Unclassified
ASV10250	0	0	0	0	4	0	0	0	0	0	0	0	0	0	190.97	0	0	0	0	0	38.194	0.001	-15.2211	0.00781469	0.0892477	d__Bacteria;p__Proteobacteria;c__Gammaproteobacteria;o__Thiotrichales;f__Thiotrichaceae;g__Thiothrix;s__uncultured gamma proteobacterium
ASV10251	0	0	0	4	0	0	0	0	0	0	0	0	0	185.37	0	0	0	0	0	0	37.074	0.001	-15.1781	0.0625063	0.332325	d__Bacteria;p__Proteobacteria;c__Deltaproteobacteria;o__Myxococcales;f__Kofleriaceae;g__Haliangium;s__Haliangium ochraceum
ASV10252	0	0	0	0	0	0	0	0	0	4	0	0	0	0	0	0	0	0	0	178.95	0.001	35.79	15.1273	0.250007	0.441558	d__Bacteria;p__Proteobacteria;c__Alphaproteobacteria;o__Hyphomicrobiales;f__Devosiaceae
ASV10253	0	0	0	0	0	0	0	0	4	0	0	0	0	0	0	0	0	0	185.43	0	0.001	37.086	15.1786	0.0625063	0.332325	d__Bacteria;p__Proteobacteria;c__Betaproteobacteria;o__Burkholderiales;f__Comamonadaceae;g__Pelomonas;s__Pelomonas saccharophila
ASV10254	0	0	4	0	0	0	0	0	0	0	0	0	168.72	0	0	0	0	0	0	0	33.744	0.001	-15.0423	0.250007	0.441558	d__Bacteria;p__Bacteroidetes;c__Chitinophagia;o__Chitinophagales;f__Chitinophagaceae;g__Hydrotalea;s__Hydrotalea flava
ASV10255	0	0	0	0	0	0	0	0	0	4	0	0	0	0	0	0	0	0	0	178.95	0.001	35.79	15.1273	0.250007	0.441558	d__Bacteria;p__Bacteroidetes;c__Flavobacteriia;o__Flavobacteriales;f__Flavobacteriaceae;g__Flavobacterium;s__Flavobacterium sp002482945
ASV10256	0	0	0	0	0	0	4	0	0	0	0	0	0	0	0	0	169.03	0	0	0	0.001	33.806	15.045	0.125007	0.349364	d__Bacteria;p__Proteobacteria;c__Betaproteobacteria;o__Burkholderiales;f__Burkholderiaceae;g__Cupriavidus;s__Cupriavidus pickettii_A
ASV10257	0	0	0	4	0	0	0	0	0	0	0	0	0	185.37	0	0	0	0	0	0	37.074	0.001	-15.1781	0.0625063	0.332325	d__Bacteria;p__Proteobacteria;c__Deltaproteobacteria;o__Myxococcales;f__Labilitrichaceae;g__Labilithrix;s__Labilithrix luteola
ASV10258	4	0	0	0	0	0	0	0	0	0	177.19	0	0	0	0	0	0	0	0	0	35.438	0.001	-15.113	0.125007	0.349364	d__Bacteria;p__Acidobacteria;c__Acidobacteriia;o__Acidobacteriales;f__Acidobacteriaceae;g__Candidatus Koribacter;s__uncultured bacterium
ASV10259	0	0	4	0	0	0	0	0	0	0	0	0	168.72	0	0	0	0	0	0	0	33.744	0.001	-15.0423	0.250007	0.441558	Unclassified
ASV1026	0	0	18	0	0	0	0	0	0	0	0	0	759.24	0	0	0	0	0	0	0	151.848	0.001	-17.2123	0.000488604	0.0120038	d__Bacteria;p__Actinobacteria;c__Actinomycetia;o__Micrococcales;f__Micrococcaceae;g__Paenarthrobacter;s__Paenarthrobacter nicotinovorans
ASV10260	0	0	4	0	0	0	0	0	0	0	0	0	168.72	0	0	0	0	0	0	0	33.744	0.001	-15.0423	0.250007	0.441558	d__Bacteria;p__Chloroflexi;c__Thermomicrobia;o__Sphaerobacterales;f__Sphaerobacteraceae;g__Sphaerobacter;s__Sphaerobacter thermophilus
ASV10261	0	0	0	0	0	0	0	0	0	4	0	0	0	0	0	0	0	0	0	178.95	0.001	35.79	15.1273	0.250007	0.441558	d__Bacteria;p__Acidobacteria;c__Acidobacteriia;o__Acidobacteriales;f__Acidobacteriaceae;g__Edaphobacter
ASV10262	4	0	0	0	0	0	0	0	0	0	177.19	0	0	0	0	0	0	0	0	0	35.438	0.001	-15.113	0.125007	0.349364	d__Bacteria;p__Proteobacteria;c__Deltaproteobacteria;o__Myxococcales;f__Labilitrichaceae;g__Labilithrix;s__Labilithrix luteola
ASV10263	0	0	0	0	4	0	0	0	0	0	0	0	0	0	190.97	0	0	0	0	0	38.194	0.001	-15.2211	0.00781469	0.0892477	d__Bacteria;p__Proteobacteria;c__Betaproteobacteria;o__Burkholderiales;f__Comamonadaceae;g__Hydrogenophaga;s__Hydrogenophaga crassostreae
ASV10264	0	0	0	0	0	0	0	0	0	4	0	0	0	0	0	0	0	0	0	178.95	0.001	35.79	15.1273	0.250007	0.441558	d__Bacteria;p__Bacteroidetes;c__Chitinophagia;o__Chitinophagales;f__Chitinophagaceae;g__Sediminibacterium;s__Sediminibacterium magnilacihabitans
ASV10265	0	0	0	0	4	0	0	0	0	0	0	0	0	0	190.97	0	0	0	0	0	38.194	0.001	-15.2211	0.00781469	0.0892477	d__Bacteria;p__Candidatus Saccharibacteria;c__norank;o__norank;f__norank;g__Candidatus Saccharimonas;s__Saccharimonas aalborgensis
ASV10266	0	0	0	0	4	0	0	0	0	0	0	0	0	0	190.97	0	0	0	0	0	38.194	0.001	-15.2211	0.00781469	0.0892477	d__Bacteria;p__Proteobacteria;c__Gammaproteobacteria;o__norank;f__norank;g__Acidibacter;s__uncultured bacterium
ASV10267	0	0	0	0	0	0	0	0	4	0	0	0	0	0	0	0	0	0	185.43	0	0.001	37.086	15.1786	0.0625063	0.332325	Unclassified
ASV10268	0	0	0	0	0	0	0	0	0	4	0	0	0	0	0	0	0	0	0	178.95	0.001	35.79	15.1273	0.250007	0.441558	d__Bacteria;p__Proteobacteria;c__Betaproteobacteria;o__Burkholderiales;f__Burkholderiaceae;g__Paraburkholderia;s__Paraburkholderia terrae
ASV10269	0	0	0	0	0	4	0	0	0	0	0	0	0	0	0	221.9	0	0	0	0	0.001	44.38	15.4376	0.0625063	0.332325	d__Bacteria;p__Proteobacteria;c__Alphaproteobacteria;o__Sphingomonadales;f__Sphingomonadaceae;g__Novosphingobium;s__Novosphingobium sp002336885
ASV1027	0	0	0	0	0	18	0	0	0	0	0	0	0	0	0	998.56	0	0	0	0	0.001	199.712	17.6076	9.55679e-07	6.34793e-05	d__Bacteria;p__Proteobacteria;c__Alphaproteobacteria;o__Rhodospirillales;f__Rhodospirillaceae;g__Hypericibacter;s__Hypericibacter terrae
ASV10270	0	0	0	0	0	0	0	0	4	0	0	0	0	0	0	0	0	0	185.43	0	0.001	37.086	15.1786	0.0625063	0.332325	d__Bacteria;p__Proteobacteria;c__Alphaproteobacteria;o__Hyphomicrobiales;f__Xanthobacteraceae;g__Pseudolabrys;s__uncultured bacterium
ASV10271	0	0	0	0	0	4	0	0	0	0	0	0	0	0	0	221.9	0	0	0	0	0.001	44.38	15.4376	0.0625063	0.332325	d__Bacteria;p__Proteobacteria;c__Alphaproteobacteria;o__Micropepsales;f__Micropepsaceae;g__Rhizomicrobium;s__Rhizomicrobium sp013149165
ASV10272	0	4	0	0	0	0	0	0	0	0	0	180.35	0	0	0	0	0	0	0	0	36.07	0.001	-15.1385	0.125007	0.349364	d__Bacteria;p__Acidobacteria;c__Acidobacteriia;o__Acidobacteriales;f__Acidobacteriaceae;g__Candidatus Koribacter;s__uncultured bacterium
ASV10273	0	0	0	0	0	0	0	0	0	4	0	0	0	0	0	0	0	0	0	178.95	0.001	35.79	15.1273	0.250007	0.441558	d__Bacteria;p__Bacteroidetes;c__Chitinophagia;o__Chitinophagales;f__Chitinophagaceae;g__Edaphobaculum;s__metagenome
ASV10274	0	0	0	0	0	0	0	0	4	0	0	0	0	0	0	0	0	0	185.43	0	0.001	37.086	15.1786	0.0625063	0.332325	d__Bacteria;p__Planctomycetes;c__Planctomycetia;o__Pirellulales;f__Pirellulaceae;g__Pirellula;s__Pirellula staleyi
ASV10275	4	0	0	0	0	0	0	0	0	0	177.19	0	0	0	0	0	0	0	0	0	35.438	0.001	-15.113	0.125007	0.349364	d__Bacteria;p__Bacteroidetes;c__Flavobacteriia;o__Flavobacteriales;f__Flavobacteriaceae;g__Flavobacterium;s__Flavobacterium sp000813005
ASV10276	0	0	0	0	0	4	0	0	0	0	0	0	0	0	0	221.9	0	0	0	0	0.001	44.38	15.4376	0.0625063	0.332325	d__Bacteria;p__Verrucomicrobia;c__Spartobacteria;o__Chthoniobacterales;f__Chthoniobacteraceae;g__Chthoniobacter;s__Chthoniobacter flavus
ASV10277	0	0	4	0	0	0	0	0	0	0	0	0	168.72	0	0	0	0	0	0	0	33.744	0.001	-15.0423	0.250007	0.441558	d__Bacteria;p__Chloroflexi;c__norank;o__norank;f__norank;g__Thermobaculum;s__Thermobaculum terrenum
ASV10278	0	0	0	0	0	0	4	0	0	0	0	0	0	0	0	0	169.03	0	0	0	0.001	33.806	15.045	0.125007	0.349364	d__Bacteria;p__Proteobacteria;c__Alphaproteobacteria;o__Micropepsales;f__Micropepsaceae;g__Rhizomicrobium
ASV10279	4	0	0	0	0	0	0	0	0	0	177.19	0	0	0	0	0	0	0	0	0	35.438	0.001	-15.113	0.125007	0.349364	d__Bacteria;p__Proteobacteria;c__Deltaproteobacteria;o__Myxococcales;f__Anaeromyxobacteraceae;g__Anaeromyxobacter;s__Anaeromyxobacter sp000017505
ASV1028	0	0	0	0	0	0	0	0	0	18	0	0	0	0	0	0	0	0	0	805.26	0.001	161.052	17.2972	0.000122181	0.00397117	d__Bacteria;p__Acidobacteria;c__Acidobacteriia;o__Acidobacteriales;f__Acidobacteriaceae
ASV10280	0	0	4	0	0	0	0	0	0	0	0	0	168.72	0	0	0	0	0	0	0	33.744	0.001	-15.0423	0.250007	0.441558	d__Bacteria;p__Proteobacteria;c__Deltaproteobacteria;o__Myxococcales;f__Kofleriaceae;g__Haliangium;s__Haliangium ochraceum
ASV10281	0	0	0	0	0	0	0	0	0	4	0	0	0	0	0	0	0	0	0	178.95	0.001	35.79	15.1273	0.250007	0.441558	d__Bacteria;p__Verrucomicrobia;c__Spartobacteria;o__Chthoniobacterales;f__Chthoniobacteraceae;g__Chthoniobacter;s__Chthoniobacter flavus
ASV10282	0	0	0	0	4	0	0	0	0	0	0	0	0	0	190.97	0	0	0	0	0	38.194	0.001	-15.2211	0.00781469	0.0892477	d__Bacteria;p__Proteobacteria;c__Deltaproteobacteria;o__Myxococcales;f__Anaeromyxobacteraceae;g__Anaeromyxobacter;s__Anaeromyxobacter dehalogenans_B
ASV10283	0	0	0	0	0	0	0	0	0	4	0	0	0	0	0	0	0	0	0	178.95	0.001	35.79	15.1273	0.250007	0.441558	d__Bacteria;p__Acidobacteria;c__Acidobacteriia;o__Acidobacteriales;f__Acidobacteriaceae;g__Edaphobacter;s__Edaphobacter lichenicola_A
ASV10284	0	4	0	0	0	0	0	0	0	0	0	180.35	0	0	0	0	0	0	0	0	36.07	0.001	-15.1385	0.125007	0.349364	d__Bacteria;p__Proteobacteria;c__Betaproteobacteria;o__Burkholderiales;f__Oxalobacteraceae;g__Massilia
ASV10285	4	0	0	0	0	0	0	0	0	0	177.19	0	0	0	0	0	0	0	0	0	35.438	0.001	-15.113	0.125007	0.349364	Unclassified
ASV10286	0	0	4	0	0	0	0	0	0	0	0	0	168.72	0	0	0	0	0	0	0	33.744	0.001	-15.0423	0.250007	0.441558	d__Bacteria;p__Proteobacteria;c__Alphaproteobacteria;o__Caulobacterales;f__Caulobacteraceae;g__Asticcacaulis
ASV10287	0	0	0	0	0	0	0	0	0	4	0	0	0	0	0	0	0	0	0	178.95	0.001	35.79	15.1273	0.250007	0.441558	d__Bacteria;p__Planctomycetes;c__Phycisphaerae;o__Sedimentisphaerales;f__Anaerohalosphaeraceae;g__Anaerohalosphaera;s__Anaerohalosphaera lusitana
ASV10288	0	4	0	0	0	0	0	0	0	0	0	180.35	0	0	0	0	0	0	0	0	36.07	0.001	-15.1385	0.125007	0.349364	d__Bacteria;p__Verrucomicrobia;c__Spartobacteria;o__Chthoniobacterales;f__Chthoniobacteraceae;g__Candidatus Udaeobacter;s__uncultured bacterium
ASV10289	0	0	0	0	0	4	0	0	0	0	0	0	0	0	0	221.9	0	0	0	0	0.001	44.38	15.4376	0.0625063	0.332325	d__Bacteria;p__Bacteroidetes;c__Chitinophagia;o__Chitinophagales;f__Chitinophagaceae;g__Chitinophaga;s__Chitinophaga sp012516355
ASV1029	0	0	0	0	0	0	18	0	0	0	0	0	0	0	0	0	760.65	0	0	0	0.001	152.13	17.2149	3.82122e-06	0.000205887	d__Bacteria;p__Proteobacteria;c__Alphaproteobacteria;o__Hyphomicrobiales;f__Bradyrhizobiaceae;g__Bradyrhizobium;s__Bradyrhizobium valentinum
ASV10290	4	0	0	0	0	0	0	0	0	0	177.19	0	0	0	0	0	0	0	0	0	35.438	0.001	-15.113	0.125007	0.349364	d__Bacteria;p__Planctomycetes;c__Planctomycetia;o__Gemmatales;f__Gemmataceae;g__Gemmata;s__uncultured bacterium
ASV10291	0	0	0	0	0	0	0	0	0	4	0	0	0	0	0	0	0	0	0	178.95	0.001	35.79	15.1273	0.250007	0.441558	d__Bacteria;p__Bacteroidetes;c__Sphingobacteriia;o__Sphingobacteriales;f__Sphingobacteriaceae;g__Mucilaginibacter
ASV10292	0	0	0	0	4	0	0	0	0	0	0	0	0	0	190.97	0	0	0	0	0	38.194	0.001	-15.2211	0.00781469	0.0892477	d__Bacteria;p__Acidobacteria;c__Acidobacteriia;o__Acidobacteriales;f__Acidobacteriaceae;g__Candidatus Koribacter;s__uncultured Acidobacteria bacterium
ASV10293	0	0	0	4	0	0	0	0	0	0	0	0	0	185.37	0	0	0	0	0	0	37.074	0.001	-15.1781	0.0625063	0.332325	d__Bacteria;p__Planctomycetes;c__Planctomycetia;o__Isosphaerales;f__Isosphaeraceae;g__Singulisphaera;s__Singulisphaera acidiphila
ASV10294	0	0	0	0	0	0	0	0	0	4	0	0	0	0	0	0	0	0	0	178.95	0.001	35.79	15.1273	0.250007	0.441558	d__Bacteria;p__Verrucomicrobia;c__Spartobacteria;o__Chthoniobacterales;f__Chthoniobacteraceae;g__Chthoniobacter;s__Chthoniobacter flavus
ASV10295	0	0	0	0	0	4	0	0	0	0	0	0	0	0	0	221.9	0	0	0	0	0.001	44.38	15.4376	0.0625063	0.332325	d__Bacteria;p__Acidobacteria;c__Acidobacteriia;o__Acidobacteriales;f__Acidobacteriaceae;g__Candidatus Koribacter;s__uncultured bacterium
ASV10296	0	0	0	0	0	0	4	0	0	0	0	0	0	0	0	0	169.03	0	0	0	0.001	33.806	15.045	0.125007	0.349364	d__Bacteria;p__Acidobacteria;c__Vicinamibacteria;o__norank;f__Vicinamibacteraceae;g__Luteitalea;s__uncultured bacterium
ASV10297	0	0	0	0	0	0	0	0	0	4	0	0	0	0	0	0	0	0	0	178.95	0.001	35.79	15.1273	0.250007	0.441558	d__Bacteria;p__Proteobacteria;c__Deltaproteobacteria;o__Myxococcales;f__Anaeromyxobacteraceae;g__Anaeromyxobacter;s__Anaeromyxobacter sp000017505
ASV10298	0	0	0	4	0	0	0	0	0	0	0	0	0	185.37	0	0	0	0	0	0	37.074	0.001	-15.1781	0.0625063	0.332325	d__Bacteria;p__Proteobacteria;c__Betaproteobacteria;o__Burkholderiales;f__Oxalobacteraceae;g__Duganella;s__Duganella sp000335815
ASV10299	0	0	0	0	4	0	0	0	0	0	0	0	0	0	190.97	0	0	0	0	0	38.194	0.001	-15.2211	0.00781469	0.0892477	d__Bacteria;p__Proteobacteria;c__Deltaproteobacteria;o__Myxococcales;f__Polyangiaceae;g__Sorangium;s__Sorangium cellulosum_D
ASV103	0	0	0	0	0	0	61	0	0	14	0	0	0	0	0	0	2577.76	0	0	626.31	0.001	640.814	19.2895	4.34473e-22	2.32101e-19	d__Bacteria;p__Candidatus Dormibacteraeota;c__norank;o__norank;f__norank;g__Candidatus Dormibacter;s__Dormibacter sp003244185
ASV1030	0	0	18	0	0	0	0	0	0	0	0	0	759.24	0	0	0	0	0	0	0	151.848	0.001	-17.2123	0.000488604	0.0120038	d__Bacteria;p__Acidobacteria;c__Acidobacteriia;o__Bryobacterales;f__Bryobacteraceae;g__Bryobacter;s__Bryobacter aggregatus
ASV10300	0	4	0	0	0	0	0	0	0	0	0	180.35	0	0	0	0	0	0	0	0	36.07	0.001	-15.1385	0.125007	0.349364	d__Bacteria;p__Planctomycetes;c__Planctomycetia;o__Planctomycetales;f__Planctomycetaceae;g__Gimesia;s__Gimesia sp007748195
ASV10301	4	0	0	0	0	0	0	0	0	0	177.19	0	0	0	0	0	0	0	0	0	35.438	0.001	-15.113	0.125007	0.349364	d__Bacteria;p__Elusimicrobia;c__Endomicrobia;o__Endomicrobiales;f__Endomicrobiaceae;g__Endomicrobium;s__uncultured bacterium
ASV10302	0	0	0	0	4	0	0	0	0	0	0	0	0	0	190.97	0	0	0	0	0	38.194	0.001	-15.2211	0.00781469	0.0892477	d__Bacteria;p__Planctomycetes;c__Planctomycetia;o__Planctomycetales;f__Planctomycetaceae;g__Gimesia;s__Gimesia sp007748015
ASV10303	0	0	0	0	4	0	0	0	0	0	0	0	0	0	190.97	0	0	0	0	0	38.194	0.001	-15.2211	0.00781469	0.0892477	d__Bacteria;p__Proteobacteria;c__Betaproteobacteria;o__Burkholderiales;f__Burkholderiaceae;g__Caballeronia;s__Caballeronia cordobensis
ASV10304	0	4	0	0	0	0	0	0	0	0	0	180.35	0	0	0	0	0	0	0	0	36.07	0.001	-15.1385	0.125007	0.349364	d__Bacteria;p__Planctomycetes;c__Planctomycetia;o__Gemmatales;f__Gemmataceae;g__Gemmata;s__Gemmata obscuriglobus
ASV10305	0	0	4	0	0	0	0	0	0	0	0	0	168.72	0	0	0	0	0	0	0	33.744	0.001	-15.0423	0.250007	0.441558	Unclassified
ASV10306	0	0	0	0	0	0	4	0	0	0	0	0	0	0	0	0	169.03	0	0	0	0.001	33.806	15.045	0.125007	0.349364	d__Bacteria;p__Actinobacteria;c__Acidimicrobiia;o__Acidimicrobiales;f__Microthrixaceae;g__Candidatus Microthrix;s__Microthrix parvicella
ASV10307	0	0	0	0	0	0	0	0	4	0	0	0	0	0	0	0	0	0	185.43	0	0.001	37.086	15.1786	0.0625063	0.332325	d__Bacteria;p__Acidobacteria;c__Acidobacteriia;o__Acidobacteriales;f__Acidobacteriaceae;g__Occallatibacter;s__uncultured Acidobacteria bacterium
ASV10308	0	0	0	0	4	0	0	0	0	0	0	0	0	0	190.97	0	0	0	0	0	38.194	0.001	-15.2211	0.00781469	0.0892477	d__Bacteria;p__Planctomycetes;c__Planctomycetia;o__Planctomycetales;f__Planctomycetaceae;g__Planctomicrobium;s__uncultured bacterium
ASV10309	0	0	0	4	0	0	0	0	0	0	0	0	0	185.37	0	0	0	0	0	0	37.074	0.001	-15.1781	0.0625063	0.332325	d__Bacteria;p__Proteobacteria;c__Gammaproteobacteria;o__Xanthomonadales;f__Xanthomonadaceae;g__Arenimonas;s__Arenimonas composti
ASV1031	0	0	0	0	0	18	0	0	0	0	0	0	0	0	0	998.56	0	0	0	0	0.001	199.712	17.6076	9.55679e-07	6.34793e-05	d__Bacteria;p__Planctomycetes;c__Planctomycetia;o__Gemmatales;f__Gemmataceae;g__Fimbriiglobus;s__Fimbriiglobus ruber
ASV10310	4	0	0	0	0	0	0	0	0	0	177.19	0	0	0	0	0	0	0	0	0	35.438	0.001	-15.113	0.125007	0.349364	d__Bacteria;p__Acidobacteria;c__Acidobacteriia;o__Bryobacterales;f__Solibacteraceae;g__Candidatus Solibacter;s__Solibacter usitatus
ASV10311	0	4	0	0	0	0	0	0	0	0	0	180.35	0	0	0	0	0	0	0	0	36.07	0.001	-15.1385	0.125007	0.349364	d__Bacteria;p__Proteobacteria;c__Alphaproteobacteria;o__Hyphomicrobiales;f__Xanthobacteraceae;g__Ancylobacter;s__Ancylobacter rudongensis
ASV10312	0	0	0	0	0	0	4	0	0	0	0	0	0	0	0	0	169.03	0	0	0	0.001	33.806	15.045	0.125007	0.349364	d__Bacteria;p__Ignavibacteriae;c__Ignavibacteria;o__Ignavibacteriales;f__Ignavibacteriaceae;g__Ignavibacterium
ASV10313	0	4	0	0	0	0	0	0	0	0	0	180.35	0	0	0	0	0	0	0	0	36.07	0.001	-15.1385	0.125007	0.349364	d__Bacteria;p__Proteobacteria;c__Gammaproteobacteria;o__Legionellales;f__Legionellaceae;g__Legionella;s__Legionella tucsonensis
ASV10314	4	0	0	0	0	0	0	0	0	0	177.19	0	0	0	0	0	0	0	0	0	35.438	0.001	-15.113	0.125007	0.349364	d__Bacteria;p__Elusimicrobia;c__Endomicrobia;o__Endomicrobiales;f__Endomicrobiaceae;g__Endomicrobium;s__uncultured bacterium
ASV10315	0	4	0	0	0	0	0	0	0	0	0	180.35	0	0	0	0	0	0	0	0	36.07	0.001	-15.1385	0.125007	0.349364	d__Bacteria;p__Cyanobacteria;c__norank
ASV10316	0	0	0	0	0	4	0	0	0	0	0	0	0	0	0	221.9	0	0	0	0	0.001	44.38	15.4376	0.0625063	0.332325	d__Bacteria;p__Verrucomicrobia;c__Spartobacteria;o__Chthoniobacterales;f__Chthoniobacteraceae;g__Chthoniobacter;s__Chthoniobacter flavus
ASV10317	0	0	0	0	0	0	0	0	4	0	0	0	0	0	0	0	0	0	185.43	0	0.001	37.086	15.1786	0.0625063	0.332325	d__Bacteria;p__Proteobacteria;c__Betaproteobacteria;o__Burkholderiales;f__norank;g__Roseateles;s__Roseateles depolymerans
ASV10318	0	0	4	0	0	0	0	0	0	0	0	0	168.72	0	0	0	0	0	0	0	33.744	0.001	-15.0423	0.250007	0.441558	d__Bacteria;p__Actinobacteria;c__Acidimicrobiia;o__Acidimicrobiales;f__Acidimicrobiaceae;g__Acidimicrobium;s__Acidimicrobium ferrooxidans
ASV10319	0	0	0	0	0	0	4	0	0	0	0	0	0	0	0	0	169.03	0	0	0	0.001	33.806	15.045	0.125007	0.349364	d__Bacteria;p__Proteobacteria;c__Betaproteobacteria;o__Rhodocyclales;f__Azonexaceae;g__Azonexus;s__Azonexus fungiphilus
ASV1032	0	18	0	0	0	0	0	0	0	0	0	811.58	0	0	0	0	0	0	0	0	162.316	0.001	-17.3084	3.82122e-06	0.000205887	d__Bacteria;p__Proteobacteria;c__Betaproteobacteria;o__Burkholderiales;f__Comamonadaceae;g__Variovorax;s__Variovorax gossypii
ASV10320	0	0	0	0	0	0	0	0	4	0	0	0	0	0	0	0	0	0	185.43	0	0.001	37.086	15.1786	0.0625063	0.332325	d__Bacteria;p__Acidobacteria;c__Acidobacteriia;o__Acidobacteriales;f__Acidobacteriaceae;g__Edaphobacter
ASV10321	4	0	0	0	0	0	0	0	0	0	177.19	0	0	0	0	0	0	0	0	0	35.438	0.001	-15.113	0.125007	0.349364	d__Bacteria;p__Verrucomicrobia;c__Verrucomicrobiae;o__Verrucomicrobiales;f__Verrucomicrobia subdivision 3;g__Pedosphaera;s__uncultured bacterium
ASV10322	0	0	0	0	0	4	0	0	0	0	0	0	0	0	0	221.9	0	0	0	0	0.001	44.38	15.4376	0.0625063	0.332325	d__Bacteria;p__Planctomycetes;c__Planctomycetia;o__Gemmatales;f__Gemmataceae;g__Limnoglobus;s__Limnoglobus roseus
ASV10323	0	0	0	4	0	0	0	0	0	0	0	0	0	185.37	0	0	0	0	0	0	37.074	0.001	-15.1781	0.0625063	0.332325	d__Bacteria;p__Acidobacteria;c__Acidobacteriia;o__Acidobacteriales;f__Acidobacteriaceae;g__Candidatus Koribacter;s__uncultured bacterium
ASV10324	4	0	0	0	0	0	0	0	0	0	177.19	0	0	0	0	0	0	0	0	0	35.438	0.001	-15.113	0.125007	0.349364	d__Bacteria;p__Elusimicrobia;c__Endomicrobia;o__Endomicrobiales;f__Endomicrobiaceae;g__Endomicrobium;s__uncultured bacterium
ASV10325	0	0	0	0	0	4	0	0	0	0	0	0	0	0	0	221.9	0	0	0	0	0.001	44.38	15.4376	0.0625063	0.332325	d__Bacteria;p__Proteobacteria;c__Alphaproteobacteria;o__Micropepsales;f__Micropepsaceae;g__Rhizomicrobium;s__Rhizomicrobium sp013149165
ASV10326	0	0	4	0	0	0	0	0	0	0	0	0	168.72	0	0	0	0	0	0	0	33.744	0.001	-15.0423	0.250007	0.441558	d__Bacteria;p__Actinobacteria;c__Acidimicrobiia;o__Acidimicrobiales;f__Acidimicrobiaceae;g__Acidimicrobium;s__Acidimicrobium ferrooxidans
ASV10327	0	0	4	0	0	0	0	0	0	0	0	0	168.72	0	0	0	0	0	0	0	33.744	0.001	-15.0423	0.250007	0.441558	d__Bacteria;p__Actinobacteria;c__Thermoleophilia;o__Solirubrobacterales;f__Conexibacteraceae;g__Conexibacter;s__uncultured Conexibacteraceae bacterium
ASV10328	0	4	0	0	0	0	0	0	0	0	0	180.35	0	0	0	0	0	0	0	0	36.07	0.001	-15.1385	0.125007	0.349364	d__Bacteria;p__Proteobacteria;c__Betaproteobacteria;o__Burkholderiales;f__Comamonadaceae;g__Variovorax;s__Variovorax sp003019815
ASV10329	4	0	0	0	0	0	0	0	0	0	177.19	0	0	0	0	0	0	0	0	0	35.438	0.001	-15.113	0.125007	0.349364	d__Bacteria;p__Proteobacteria;c__Betaproteobacteria;o__Burkholderiales;f__Oxalobacteraceae;g__Duganella;s__Duganella sp000335815
ASV1033	18	0	0	0	0	0	0	0	0	0	797.34	0	0	0	0	0	0	0	0	0	159.468	0.001	-17.2829	6.10993e-05	0.0021366	d__Bacteria;p__Proteobacteria;c__Alphaproteobacteria;o__Rickettsiales;f__Anaplasmataceae;g__Wolbachia;s__Wolbachia sp902636535
ASV10330	0	0	0	0	0	0	4	0	0	0	0	0	0	0	0	0	169.03	0	0	0	0.001	33.806	15.045	0.125007	0.349364	d__Bacteria;p__Proteobacteria;c__Alphaproteobacteria;o__Hyphomicrobiales;f__Xanthobacteraceae;g__Pseudolabrys;s__uncultured bacterium
ASV10331	0	0	0	0	0	4	0	0	0	0	0	0	0	0	0	221.9	0	0	0	0	0.001	44.38	15.4376	0.0625063	0.332325	d__Bacteria;p__Proteobacteria;c__Alphaproteobacteria;o__Rhodospirillales;f__Stellaceae;g__Stella;s__Stella sp006738865
ASV10332	0	0	4	0	0	0	0	0	0	0	0	0	168.72	0	0	0	0	0	0	0	33.744	0.001	-15.0423	0.250007	0.441558	d__Bacteria;p__Proteobacteria;c__Alphaproteobacteria;o__Rhodospirillales;f__Acetobacteraceae;g__Acidicaldus;s__uncultured bacterium
ASV10333	0	0	0	0	4	0	0	0	0	0	0	0	0	0	190.97	0	0	0	0	0	38.194	0.001	-15.2211	0.00781469	0.0892477	d__Bacteria;p__Planctomycetes;c__Phycisphaerae;o__Sedimentisphaerales;f__Anaerohalosphaeraceae;g__Anaerohalosphaera;s__Anaerohalosphaera lusitana
ASV10334	0	0	0	0	0	4	0	0	0	0	0	0	0	0	0	221.9	0	0	0	0	0.001	44.38	15.4376	0.0625063	0.332325	d__Bacteria;p__Bacteroidetes;c__Chitinophagia;o__Chitinophagales;f__Chitinophagaceae;g__Flavipsychrobacter;s__Flavipsychrobacter sp013286835
ASV10335	0	4	0	0	0	0	0	0	0	0	0	180.35	0	0	0	0	0	0	0	0	36.07	0.001	-15.1385	0.125007	0.349364	d__Bacteria;p__Verrucomicrobia;c__Verrucomicrobiae;o__Verrucomicrobiales;f__Verrucomicrobia subdivision 3
ASV10336	0	0	0	0	0	0	0	0	0	4	0	0	0	0	0	0	0	0	0	178.95	0.001	35.79	15.1273	0.250007	0.441558	d__Bacteria;p__Bacteroidetes;c__Chitinophagia;o__Chitinophagales;f__Chitinophagaceae;g__Sediminibacterium;s__uncultured bacterium
ASV10337	0	0	0	0	0	0	0	0	4	0	0	0	0	0	0	0	0	0	185.43	0	0.001	37.086	15.1786	0.0625063	0.332325	d__Bacteria;p__Firmicutes;c__Clostridia;o__Eubacteriales;f__Clostridiaceae;g__Clostridium;s__Clostridium beijerinckii
ASV10338	0	0	0	0	4	0	0	0	0	0	0	0	0	0	190.97	0	0	0	0	0	38.194	0.001	-15.2211	0.00781469	0.0892477	d__Bacteria;p__Proteobacteria;c__Gammaproteobacteria;o__norank;f__norank;g__Acidibacter;s__uncultured bacterium
ASV10339	0	0	0	0	0	0	0	0	0	4	0	0	0	0	0	0	0	0	0	178.95	0.001	35.79	15.1273	0.250007	0.441558	d__Bacteria;p__Acidobacteria;c__Acidobacteriia;o__Acidobacteriales;f__Acidobacteriaceae;g__Occallatibacter;s__uncultured bacterium
ASV1034	0	0	0	0	0	17	0	0	0	0	0	0	0	0	0	943.08	0	0	0	0	0.001	188.616	17.5251	1.91098e-06	0.000112236	d__Bacteria;p__Planctomycetes;c__Phycisphaerae;o__Tepidisphaerales;f__Tepidisphaeraceae;g__Tepidisphaera;s__Tepidisphaera mucosa
ASV10340	4	0	0	0	0	0	0	0	0	0	177.19	0	0	0	0	0	0	0	0	0	35.438	0.001	-15.113	0.125007	0.349364	d__Bacteria;p__Acidobacteria;c__Vicinamibacteria;o__norank;f__Vicinamibacteraceae;g__Luteitalea;s__Luteitalea pratensis
ASV10341	0	0	4	0	0	0	0	0	0	0	0	0	168.72	0	0	0	0	0	0	0	33.744	0.001	-15.0423	0.250007	0.441558	d__Bacteria;p__Acidobacteria;c__Acidobacteriia;o__Acidobacteriales;f__Acidobacteriaceae;g__Candidatus Koribacter;s__uncultured Acidobacteria bacterium
ASV10342	0	0	0	0	0	0	0	0	4	0	0	0	0	0	0	0	0	0	185.43	0	0.001	37.086	15.1786	0.0625063	0.332325	d__Bacteria;p__Proteobacteria;c__Gammaproteobacteria;o__Pseudomonadales;f__Pseudomonadaceae;g__Pseudomonas;s__Pseudomonas plecoglossicida
ASV10343	0	0	0	0	0	0	0	0	0	4	0	0	0	0	0	0	0	0	0	178.95	0.001	35.79	15.1273	0.250007	0.441558	d__Bacteria;p__Actinobacteria;c__Rubrobacteria;o__Gaiellales;f__Gaiellaceae;g__Gaiella;s__Gaiella occulta
ASV10344	0	0	0	4	0	0	0	0	0	0	0	0	0	185.37	0	0	0	0	0	0	37.074	0.001	-15.1781	0.0625063	0.332325	d__Bacteria;p__Proteobacteria;c__Alphaproteobacteria;o__Rhodospirillales;f__Acetobacteraceae;g__Kozakia;s__Kozakia baliensis
ASV10345	4	0	0	0	0	0	0	0	0	0	177.19	0	0	0	0	0	0	0	0	0	35.438	0.001	-15.113	0.125007	0.349364	d__Bacteria;p__Proteobacteria;c__Betaproteobacteria;o__Burkholderiales;f__Oxalobacteraceae;g__Herbaspirillum;s__Herbaspirillum hiltneri
ASV10346	0	0	0	0	0	4	0	0	0	0	0	0	0	0	0	221.9	0	0	0	0	0.001	44.38	15.4376	0.0625063	0.332325	d__Bacteria;p__Acidobacteria;c__Vicinamibacteria;o__norank;f__Vicinamibacteraceae;g__Luteitalea;s__Luteitalea pratensis
ASV10347	0	0	0	0	4	0	0	0	0	0	0	0	0	0	190.97	0	0	0	0	0	38.194	0.001	-15.2211	0.00781469	0.0892477	d__Bacteria;p__Chloroflexi;c__norank;o__norank;f__norank;g__Thermobaculum;s__Thermobaculum terrenum
ASV10348	0	0	0	0	0	0	0	0	0	4	0	0	0	0	0	0	0	0	0	178.95	0.001	35.79	15.1273	0.250007	0.441558	d__Bacteria;p__Planctomycetes;c__Phycisphaerae;o__Sedimentisphaerales;f__Sedimentisphaeraceae;g__Limihaloglobus;s__Limihaloglobus sulfuriphilus
ASV10349	0	0	0	0	4	0	0	0	0	0	0	0	0	0	190.97	0	0	0	0	0	38.194	0.001	-15.2211	0.00781469	0.0892477	d__Bacteria;p__Proteobacteria;c__Alphaproteobacteria;o__Rhodospirillales;f__Rhodospirillaceae;g__Hypericibacter;s__Hypericibacter adhaerens
ASV1035	0	0	0	17	0	0	0	0	0	0	0	0	0	787.84	0	0	0	0	0	0	157.568	0.001	-17.2656	7.64107e-06	0.000371087	d__Bacteria;p__Firmicutes;c__Clostridia;o__Eubacteriales;f__Peptococcaceae;g__Desulfofundulus;s__Desulfofundulus kuznetsovii
ASV10350	0	0	0	0	4	0	0	0	0	0	0	0	0	0	190.97	0	0	0	0	0	38.194	0.001	-15.2211	0.00781469	0.0892477	d__Bacteria;p__Chloroflexi;c__Ktedonobacteria;o__Thermogemmatisporales;f__Thermogemmatisporaceae;g__Thermogemmatispora;s__Thermogemmatispora carboxidivorans
ASV10351	0	4	0	0	0	0	0	0	0	0	0	180.35	0	0	0	0	0	0	0	0	36.07	0.001	-15.1385	0.125007	0.349364	d__Bacteria;p__Acidobacteria;c__Acidobacteriia;o__Acidobacteriales;f__Acidobacteriaceae;g__Terracidiphilus;s__Terracidiphilus sp903849645
ASV10352	0	0	0	4	0	0	0	0	0	0	0	0	0	185.37	0	0	0	0	0	0	37.074	0.001	-15.1781	0.0625063	0.332325	d__Bacteria;p__norank;c__Candidatus Babeliae;o__Candidatus Babeliales;f__Candidatus Babeliaceae;g__Candidatus Babela
ASV10353	0	0	4	0	0	0	0	0	0	0	0	0	168.72	0	0	0	0	0	0	0	33.744	0.001	-15.0423	0.250007	0.441558	d__Bacteria;p__Proteobacteria;c__Oligoflexia;o__Bdellovibrionales;f__Bdellovibrionaceae;g__Bdellovibrio;s__uncultured bacterium
ASV10354	0	0	0	0	0	0	0	0	0	4	0	0	0	0	0	0	0	0	0	178.95	0.001	35.79	15.1273	0.250007	0.441558	Unclassified
ASV10355	0	0	0	4	0	0	0	0	0	0	0	0	0	185.37	0	0	0	0	0	0	37.074	0.001	-15.1781	0.0625063	0.332325	Unclassified
ASV10356	0	0	0	0	0	0	4	0	0	0	0	0	0	0	0	0	169.03	0	0	0	0.001	33.806	15.045	0.125007	0.349364	d__Bacteria;p__Planctomycetes;c__Planctomycetia;o__Gemmatales;f__Gemmataceae;g__Fimbriiglobus;s__Fimbriiglobus ruber
ASV10357	0	0	0	0	0	4	0	0	0	0	0	0	0	0	0	221.9	0	0	0	0	0.001	44.38	15.4376	0.0625063	0.332325	d__Bacteria;p__Gemmatimonadetes;c__Gemmatimonadetes;o__Gemmatimonadales;f__Gemmatimonadaceae;g__Gemmatirosa;s__Gemmatirosa kalamazoonesis
ASV10358	4	0	0	0	0	0	0	0	0	0	177.19	0	0	0	0	0	0	0	0	0	35.438	0.001	-15.113	0.125007	0.349364	d__Bacteria;p__Verrucomicrobia;c__Spartobacteria;o__Chthoniobacterales;f__Chthoniobacteraceae;g__Chthoniobacter;s__Chthoniobacter flavus
ASV10359	0	0	0	0	0	0	0	0	4	0	0	0	0	0	0	0	0	0	185.43	0	0.001	37.086	15.1786	0.0625063	0.332325	d__Bacteria;p__Acidobacteria;c__Acidobacteriia;o__Acidobacteriales;f__Acidobacteriaceae;g__Candidatus Koribacter;s__uncultured bacterium
ASV1036	0	0	0	0	0	17	0	0	0	0	0	0	0	0	0	943.08	0	0	0	0	0.001	188.616	17.5251	1.91098e-06	0.000112236	d__Bacteria;p__Proteobacteria;c__Gammaproteobacteria;o__norank;f__norank;g__Acidibacter;s__uncultured gamma proteobacterium
ASV10360	0	0	0	0	4	0	0	0	0	0	0	0	0	0	190.97	0	0	0	0	0	38.194	0.001	-15.2211	0.00781469	0.0892477	d__Bacteria;p__Acidobacteria;c__Acidobacteriia;o__Acidobacteriales;f__Acidobacteriaceae;g__Silvibacterium;s__Silvibacterium bohemicum
ASV10361	0	4	0	0	0	0	0	0	0	0	0	180.35	0	0	0	0	0	0	0	0	36.07	0.001	-15.1385	0.125007	0.349364	d__Bacteria;p__Planctomycetes;c__Planctomycetia;o__Pirellulales;f__Pirellulaceae;g__Bremerella;s__Bremerella marina_B
ASV10362	0	4	0	0	0	0	0	0	0	0	0	180.35	0	0	0	0	0	0	0	0	36.07	0.001	-15.1385	0.125007	0.349364	d__Bacteria;p__Bacteroidetes;c__Sphingobacteriia;o__Sphingobacteriales;f__Sphingobacteriaceae;g__Mucilaginibacter;s__Mucilaginibacter ginsenosidivorax
ASV10363	0	0	0	4	0	0	0	0	0	0	0	0	0	185.37	0	0	0	0	0	0	37.074	0.001	-15.1781	0.0625063	0.332325	d__Bacteria;p__Proteobacteria;c__Betaproteobacteria;o__Burkholderiales;f__Comamonadaceae;g__Ramlibacter;s__Ramlibacter sp013087525
ASV10364	0	0	0	0	0	4	0	0	0	0	0	0	0	0	0	221.9	0	0	0	0	0.001	44.38	15.4376	0.0625063	0.332325	d__Bacteria;p__Acidobacteria;c__Acidobacteriia;o__Bryobacterales;f__Solibacteraceae;g__Candidatus Solibacter;s__Solibacter usitatus
ASV10365	0	4	0	0	0	0	0	0	0	0	0	180.35	0	0	0	0	0	0	0	0	36.07	0.001	-15.1385	0.125007	0.349364	d__Bacteria;p__Acidobacteria;c__Acidobacteriia;o__Acidobacteriales;f__Acidobacteriaceae;g__Occallatibacter;s__uncultured bacterium
ASV10366	0	0	0	0	0	0	4	0	0	0	0	0	0	0	0	0	169.03	0	0	0	0.001	33.806	15.045	0.125007	0.349364	d__Bacteria;p__Proteobacteria;c__Gammaproteobacteria;o__norank;f__norank;g__Acidibacter;s__uncultured bacterium
ASV10367	4	0	0	0	0	0	0	0	0	0	177.19	0	0	0	0	0	0	0	0	0	35.438	0.001	-15.113	0.125007	0.349364	d__Bacteria;p__Bacteroidetes;c__Chitinophagia;o__Chitinophagales;f__Chitinophagaceae;g__Ferruginibacter;s__uncultured bacterium
ASV10368	0	0	0	0	0	4	0	0	0	0	0	0	0	0	0	221.9	0	0	0	0	0.001	44.38	15.4376	0.0625063	0.332325	d__Bacteria;p__Proteobacteria;c__Deltaproteobacteria;o__Myxococcales;f__Kofleriaceae;g__Haliangium;s__Haliangium ochraceum
ASV10369	0	0	0	0	0	0	0	0	0	4	0	0	0	0	0	0	0	0	0	178.95	0.001	35.79	15.1273	0.250007	0.441558	d__Bacteria;p__Elusimicrobia;c__Endomicrobia;o__Endomicrobiales;f__Endomicrobiaceae;g__Endomicrobium;s__uncultured bacterium
ASV1037	0	0	0	0	0	0	17	0	0	0	0	0	0	0	0	0	718.39	0	0	0	0.001	143.678	17.1325	7.64107e-06	0.000371087	d__Bacteria;p__Planctomycetes;c__Planctomycetia;o__Gemmatales;f__Gemmataceae;g__Fimbriiglobus;s__Fimbriiglobus ruber
ASV10370	0	0	4	0	0	0	0	0	0	0	0	0	168.72	0	0	0	0	0	0	0	33.744	0.001	-15.0423	0.250007	0.441558	d__Bacteria;p__Acidobacteria;c__Acidobacteriia;o__Acidobacteriales;f__Acidobacteriaceae;g__Granulicella
ASV10371	0	4	0	0	0	0	0	0	0	0	0	180.35	0	0	0	0	0	0	0	0	36.07	0.001	-15.1385	0.125007	0.349364	d__Bacteria;p__Chloroflexi;c__Ktedonobacteria;o__Ktedonobacterales;f__Ktedonosporobacteraceae;g__Ktedonosporobacter;s__Ktedonosporobacter rubrisoli
ASV10372	4	0	0	0	0	0	0	0	0	0	177.19	0	0	0	0	0	0	0	0	0	35.438	0.001	-15.113	0.125007	0.349364	d__Bacteria;p__Planctomycetes;c__Planctomycetia;o__Isosphaerales;f__Isosphaeraceae;g__Singulisphaera;s__Singulisphaera acidiphila
ASV10373	0	0	4	0	0	0	0	0	0	0	0	0	168.72	0	0	0	0	0	0	0	33.744	0.001	-15.0423	0.250007	0.441558	d__Bacteria;p__Acidobacteria;c__Acidobacteriia;o__Acidobacteriales;f__Acidobacteriaceae;g__Candidatus Koribacter;s__uncultured bacterium
ASV10374	0	0	0	0	0	0	0	0	4	0	0	0	0	0	0	0	0	0	185.43	0	0.001	37.086	15.1786	0.0625063	0.332325	d__Bacteria;p__Firmicutes;c__Clostridia;o__Eubacteriales;f__Clostridiaceae;g__Fonticella;s__uncultured bacterium
ASV10375	0	0	0	0	0	0	0	0	4	0	0	0	0	0	0	0	0	0	185.43	0	0.001	37.086	15.1786	0.0625063	0.332325	d__Bacteria;p__Planctomycetes;c__Phycisphaerae;o__Phycisphaerales;f__Phycisphaeraceae;g__Phycisphaera;s__Phycisphaera mikurensis
ASV10376	0	0	0	0	4	0	0	0	0	0	0	0	0	0	190.97	0	0	0	0	0	38.194	0.001	-15.2211	0.00781469	0.0892477	d__Bacteria;p__Planctomycetes;c__Planctomycetia;o__Gemmatales;f__Gemmataceae;g__Fimbriiglobus;s__Fimbriiglobus ruber
ASV10377	0	0	0	0	0	4	0	0	0	0	0	0	0	0	0	221.9	0	0	0	0	0.001	44.38	15.4376	0.0625063	0.332325	d__Bacteria;p__Actinobacteria;c__Rubrobacteria;o__Gaiellales;f__Gaiellaceae;g__Gaiella;s__Gaiella occulta
ASV10378	4	0	0	0	0	0	0	0	0	0	177.19	0	0	0	0	0	0	0	0	0	35.438	0.001	-15.113	0.125007	0.349364	d__Bacteria;p__Planctomycetes;c__Phycisphaerae;o__Phycisphaerales;f__Phycisphaeraceae;g__Phycisphaera;s__Phycisphaera mikurensis
ASV10379	4	0	0	0	0	0	0	0	0	0	177.19	0	0	0	0	0	0	0	0	0	35.438	0.001	-15.113	0.125007	0.349364	d__Bacteria;p__Fibrobacteres;c__Fibrobacteria;o__Fibrobacterales;f__Fibrobacteraceae;g__Fibrobacter;s__Fibrobacter sp003149045
ASV1038	0	0	0	0	17	0	0	0	0	0	0	0	0	0	811.61	0	0	0	0	0	162.322	0.001	-17.3085	1.87076e-09	2.33687e-07	d__Bacteria;p__Bacteroidetes;c__Chitinophagia;o__Chitinophagales;f__Chitinophagaceae;g__Pseudobacter;s__Pseudobacter ginsenosidimutans
ASV10380	4	0	0	0	0	0	0	0	0	0	177.19	0	0	0	0	0	0	0	0	0	35.438	0.001	-15.113	0.125007	0.349364	d__Bacteria;p__Proteobacteria;c__Gammaproteobacteria;o__Xanthomonadales;f__Rhodanobacteraceae;g__Rhodanobacter;s__uncultured bacterium
ASV10381	0	0	0	4	0	0	0	0	0	0	0	0	0	185.37	0	0	0	0	0	0	37.074	0.001	-15.1781	0.0625063	0.332325	d__Bacteria;p__Ignavibacteriae;c__Ignavibacteria;o__Ignavibacteriales;f__Ignavibacteriaceae;g__Ignavibacterium;s__uncultured bacterium
ASV10382	0	0	0	0	0	0	0	0	4	0	0	0	0	0	0	0	0	0	185.43	0	0.001	37.086	15.1786	0.0625063	0.332325	d__Bacteria;p__Proteobacteria;c__Alphaproteobacteria;o__Hyphomicrobiales;f__Rhizobiaceae;g__Rhizobium;s__Rhizobium sp014194695
ASV10383	0	0	0	0	4	0	0	0	0	0	0	0	0	0	190.97	0	0	0	0	0	38.194	0.001	-15.2211	0.00781469	0.0892477	d__Bacteria;p__Acidobacteria;c__Acidobacteriia;o__Bryobacterales;f__Solibacteraceae;g__Candidatus Solibacter;s__Solibacter usitatus
ASV10384	0	0	0	0	4	0	0	0	0	0	0	0	0	0	190.97	0	0	0	0	0	38.194	0.001	-15.2211	0.00781469	0.0892477	d__Bacteria;p__Candidatus Dormibacteraeota;c__norank;o__norank;f__norank;g__Candidatus Dormibacter;s__Dormibacter sp003244185
ASV10385	0	0	0	0	4	0	0	0	0	0	0	0	0	0	190.97	0	0	0	0	0	38.194	0.001	-15.2211	0.00781469	0.0892477	d__Bacteria;p__Proteobacteria;c__Gammaproteobacteria;o__Legionellales;f__Coxiellaceae;g__Diplorickettsia;s__Diplorickettsia massiliensis
ASV10386	4	0	0	0	0	0	0	0	0	0	177.19	0	0	0	0	0	0	0	0	0	35.438	0.001	-15.113	0.125007	0.349364	d__Bacteria;p__Verrucomicrobia;c__Verrucomicrobiae;o__Verrucomicrobiales;f__Verrucomicrobia subdivision 3;g__Pedosphaera;s__uncultured Verrucomicrobia bacterium
ASV10387	4	0	0	0	0	0	0	0	0	0	177.19	0	0	0	0	0	0	0	0	0	35.438	0.001	-15.113	0.125007	0.349364	d__Bacteria;p__Proteobacteria;c__Betaproteobacteria
ASV10388	4	0	0	0	0	0	0	0	0	0	177.19	0	0	0	0	0	0	0	0	0	35.438	0.001	-15.113	0.125007	0.349364	d__Bacteria;p__Proteobacteria;c__Oligoflexia;o__Bdellovibrionales;f__Bdellovibrionaceae;g__Bdellovibrio;s__Bdellovibrio sp013752535
ASV10389	0	0	0	4	0	0	0	0	0	0	0	0	0	185.37	0	0	0	0	0	0	37.074	0.001	-15.1781	0.0625063	0.332325	d__Bacteria;p__Planctomycetes;c__Planctomycetia;o__Isosphaerales;f__Isosphaeraceae;g__Singulisphaera;s__Singulisphaera sp900129635
ASV1039	0	0	0	0	0	17	0	0	0	0	0	0	0	0	0	943.08	0	0	0	0	0.001	188.616	17.5251	1.91098e-06	0.000112236	d__Bacteria;p__Planctomycetes;c__Planctomycetia;o__Gemmatales;f__Gemmataceae;g__Tuwongella;s__Tuwongella immobilis
ASV10390	0	0	0	0	0	0	0	0	0	4	0	0	0	0	0	0	0	0	0	178.95	0.001	35.79	15.1273	0.250007	0.441558	d__Bacteria;p__Planctomycetes;c__Planctomycetia;o__Pirellulales;f__Pirellulaceae;g__Bremerella;s__Bremerella marina_B
ASV10391	0	0	0	0	0	0	4	0	0	0	0	0	0	0	0	0	169.03	0	0	0	0.001	33.806	15.045	0.125007	0.349364	d__Bacteria;p__Actinobacteria;c__Thermoleophilia;o__Solirubrobacterales;f__Conexibacteraceae;g__Conexibacter
ASV10392	4	0	0	0	0	0	0	0	0	0	177.19	0	0	0	0	0	0	0	0	0	35.438	0.001	-15.113	0.125007	0.349364	d__Bacteria;p__Proteobacteria;c__Betaproteobacteria;o__Burkholderiales;f__Comamonadaceae;g__Ramlibacter;s__Ramlibacter sp013778345
ASV10393	0	0	4	0	0	0	0	0	0	0	0	0	168.72	0	0	0	0	0	0	0	33.744	0.001	-15.0423	0.250007	0.441558	d__Bacteria;p__Acidobacteria;c__Acidobacteriia;o__Acidobacteriales;f__Acidobacteriaceae;g__Edaphobacter;s__uncultured bacterium
ASV10394	0	0	0	0	0	0	4	0	0	0	0	0	0	0	0	0	169.03	0	0	0	0.001	33.806	15.045	0.125007	0.349364	d__Bacteria;p__Planctomycetes;c__Planctomycetia;o__Isosphaerales;f__Isosphaeraceae;g__Paludisphaera;s__Paludisphaera borealis
ASV10395	4	0	0	0	0	0	0	0	0	0	177.19	0	0	0	0	0	0	0	0	0	35.438	0.001	-15.113	0.125007	0.349364	d__Bacteria;p__Acidobacteria;c__Vicinamibacteria;o__norank;f__Vicinamibacteraceae;g__Luteitalea;s__Luteitalea pratensis
ASV10396	0	0	0	0	0	4	0	0	0	0	0	0	0	0	0	221.9	0	0	0	0	0.001	44.38	15.4376	0.0625063	0.332325	d__Bacteria;p__Proteobacteria;c__Alphaproteobacteria;o__Rhodospirillales;f__Rhodospirillaceae;g__Hypericibacter;s__Hypericibacter terrae
ASV10397	0	0	0	0	0	0	0	0	0	4	0	0	0	0	0	0	0	0	0	178.95	0.001	35.79	15.1273	0.250007	0.441558	Unclassified
ASV10398	0	4	0	0	0	0	0	0	0	0	0	180.35	0	0	0	0	0	0	0	0	36.07	0.001	-15.1385	0.125007	0.349364	d__Bacteria;p__Planctomycetes;c__Planctomycetia;o__Pirellulales;f__Pirellulaceae;g__Pirellula;s__Pirellula staleyi
ASV10399	4	0	0	0	0	0	0	0	0	0	177.19	0	0	0	0	0	0	0	0	0	35.438	0.001	-15.113	0.125007	0.349364	d__Bacteria;p__Proteobacteria;c__Alphaproteobacteria;o__Hyphomicrobiales;f__Bradyrhizobiaceae;g__Afipia;s__Afipia broomeae
ASV104	0	0	0	0	0	42	0	0	0	32	0	0	0	0	0	2329.97	0	0	0	1431.58	0.001	752.31	19.521	4.34473e-22	2.32101e-19	Unclassified
ASV1040	0	0	0	17	0	0	0	0	0	0	0	0	0	787.84	0	0	0	0	0	0	157.568	0.001	-17.2656	7.64107e-06	0.000371087	d__Bacteria;p__Proteobacteria;c__Betaproteobacteria;o__Burkholderiales;f__Burkholderiaceae;g__Pandoraea;s__Pandoraea apista
ASV10400	0	0	0	0	0	0	4	0	0	0	0	0	0	0	0	0	169.03	0	0	0	0.001	33.806	15.045	0.125007	0.349364	d__Bacteria;p__Planctomycetes;c__Planctomycetia;o__Gemmatales;f__Gemmataceae;g__Fimbriiglobus;s__Fimbriiglobus ruber
ASV10401	4	0	0	0	0	0	0	0	0	0	177.19	0	0	0	0	0	0	0	0	0	35.438	0.001	-15.113	0.125007	0.349364	d__Bacteria;p__Verrucomicrobia;c__Verrucomicrobiae;o__Verrucomicrobiales;f__Verrucomicrobia subdivision 3;g__Pedosphaera;s__uncultured bacterium
ASV10402	0	0	0	0	0	0	0	0	0	4	0	0	0	0	0	0	0	0	0	178.95	0.001	35.79	15.1273	0.250007	0.441558	d__Bacteria;p__Proteobacteria;c__Alphaproteobacteria;o__Rhodospirillales;f__Stellaceae;g__Stella;s__Stella sp006738865
ASV10403	0	0	0	0	0	0	0	0	4	0	0	0	0	0	0	0	0	0	185.43	0	0.001	37.086	15.1786	0.0625063	0.332325	d__Bacteria;p__Planctomycetes;c__Planctomycetia;o__Gemmatales;f__Gemmataceae;g__Fimbriiglobus;s__uncultured bacterium
ASV10404	0	0	4	0	0	0	0	0	0	0	0	0	168.72	0	0	0	0	0	0	0	33.744	0.001	-15.0423	0.250007	0.441558	d__Bacteria;p__Planctomycetes;c__Planctomycetia;o__Isosphaerales;f__Isosphaeraceae;g__Aquisphaera;s__Aquisphaera giovannonii
ASV10405	0	0	0	0	0	0	0	0	4	0	0	0	0	0	0	0	0	0	185.43	0	0.001	37.086	15.1786	0.0625063	0.332325	d__Bacteria;p__Bacteroidetes;c__Sphingobacteriia;o__Sphingobacteriales;f__Sphingobacteriaceae;g__Mucilaginibacter;s__Mucilaginibacter sp003576455
ASV10406	0	4	0	0	0	0	0	0	0	0	0	180.35	0	0	0	0	0	0	0	0	36.07	0.001	-15.1385	0.125007	0.349364	d__Bacteria;p__Verrucomicrobia;c__Verrucomicrobiae;o__Verrucomicrobiales;f__Verrucomicrobia subdivision 3;g__Pedosphaera;s__uncultured bacterium
ASV10407	0	0	0	0	4	0	0	0	0	0	0	0	0	0	190.97	0	0	0	0	0	38.194	0.001	-15.2211	0.00781469	0.0892477	d__Bacteria;p__Proteobacteria;c__Alphaproteobacteria;o__Hyphomicrobiales;f__norank;g__Pseudorhodoplanes;s__Pseudorhodoplanes sinuspersici
ASV10408	4	0	0	0	0	0	0	0	0	0	177.19	0	0	0	0	0	0	0	0	0	35.438	0.001	-15.113	0.125007	0.349364	d__Bacteria;p__Proteobacteria;c__Alphaproteobacteria;o__Hyphomicrobiales;f__Xanthobacteraceae;g__Xanthobacter;s__Xanthobacter autotrophicus
ASV10409	0	0	0	0	0	0	4	0	0	0	0	0	0	0	0	0	169.03	0	0	0	0.001	33.806	15.045	0.125007	0.349364	d__Bacteria;p__Acidobacteria;c__Acidobacteriia;o__Acidobacteriales;f__Acidobacteriaceae;g__Candidatus Koribacter;s__uncultured bacterium
ASV1041	0	17	0	0	0	0	0	0	0	0	0	766.49	0	0	0	0	0	0	0	0	153.298	0.001	-17.226	7.64107e-06	0.000371087	d__Bacteria;p__Acidobacteria;c__Acidobacteriia;o__Acidobacteriales;f__Acidobacteriaceae;g__Terracidiphilus;s__Terracidiphilus sp903849645
ASV10410	0	0	0	0	0	0	0	0	4	0	0	0	0	0	0	0	0	0	185.43	0	0.001	37.086	15.1786	0.0625063	0.332325	d__Bacteria;p__Proteobacteria;c__Gammaproteobacteria;o__norank;f__norank;g__Acidibacter;s__uncultured gamma proteobacterium
ASV10411	0	0	0	0	0	0	4	0	0	0	0	0	0	0	0	0	169.03	0	0	0	0.001	33.806	15.045	0.125007	0.349364	d__Bacteria;p__Candidatus Saccharibacteria;c__norank;o__norank;f__norank;g__Candidatus Saccharimonas;s__Saccharimonas aalborgensis
ASV10412	0	0	0	0	0	4	0	0	0	0	0	0	0	0	0	221.9	0	0	0	0	0.001	44.38	15.4376	0.0625063	0.332325	d__Bacteria;p__Proteobacteria;c__Betaproteobacteria;o__Burkholderiales;f__norank;g__Rubrivivax;s__Rubrivivax sp001295865
ASV10413	0	0	0	0	0	0	4	0	0	0	0	0	0	0	0	0	169.03	0	0	0	0.001	33.806	15.045	0.125007	0.349364	d__Bacteria;p__Gemmatimonadetes;c__Gemmatimonadetes;o__Gemmatimonadales;f__Gemmatimonadaceae;g__Gemmatirosa;s__Gemmatirosa kalamazoonesis
ASV10414	0	0	0	0	0	0	0	0	4	0	0	0	0	0	0	0	0	0	185.43	0	0.001	37.086	15.1786	0.0625063	0.332325	Unclassified
ASV10415	0	0	0	0	0	0	0	0	0	4	0	0	0	0	0	0	0	0	0	178.95	0.001	35.79	15.1273	0.250007	0.441558	d__Bacteria;p__Proteobacteria;c__Deltaproteobacteria;o__Desulfuromonadales;f__Geobacteraceae;g__Geobacter;s__Geobacter pickeringii
ASV10416	0	0	0	0	4	0	0	0	0	0	0	0	0	0	190.97	0	0	0	0	0	38.194	0.001	-15.2211	0.00781469	0.0892477	d__Bacteria;p__Acidobacteria;c__Acidobacteriia;o__Acidobacteriales;f__Acidobacteriaceae;g__Candidatus Koribacter;s__uncultured bacterium
ASV10417	0	0	0	0	0	0	0	0	4	0	0	0	0	0	0	0	0	0	185.43	0	0.001	37.086	15.1786	0.0625063	0.332325	d__Bacteria;p__Proteobacteria;c__Deltaproteobacteria;o__Desulfuromonadales;f__Geobacteraceae;g__Geomonas;s__Geomonas ferrireducens
ASV10418	0	0	0	0	4	0	0	0	0	0	0	0	0	0	190.97	0	0	0	0	0	38.194	0.001	-15.2211	0.00781469	0.0892477	d__Bacteria;p__Proteobacteria;c__Gammaproteobacteria;o__Xanthomonadales;f__Rhodanobacteraceae;g__Rudaea
ASV10419	4	0	0	0	0	0	0	0	0	0	177.19	0	0	0	0	0	0	0	0	0	35.438	0.001	-15.113	0.125007	0.349364	d__Bacteria;p__Gemmatimonadetes;c__Gemmatimonadetes;o__Gemmatimonadales;f__Gemmatimonadaceae;g__Gemmatimonas;s__Gemmatimonas phototrophica
ASV1042	0	17	0	0	0	0	0	0	0	0	0	766.49	0	0	0	0	0	0	0	0	153.298	0.001	-17.226	7.64107e-06	0.000371087	d__Bacteria;p__Acidobacteria;c__Acidobacteriia;o__Bryobacterales
ASV10420	0	0	0	0	0	0	4	0	0	0	0	0	0	0	0	0	169.03	0	0	0	0.001	33.806	15.045	0.125007	0.349364	d__Bacteria;p__Acidobacteria;c__Vicinamibacteria;o__norank;f__Vicinamibacteraceae;g__Luteitalea;s__Luteitalea pratensis
ASV10421	0	0	4	0	0	0	0	0	0	0	0	0	168.72	0	0	0	0	0	0	0	33.744	0.001	-15.0423	0.250007	0.441558	d__Bacteria;p__Acidobacteria;c__Acidobacteriia;o__Acidobacteriales;f__Acidobacteriaceae;g__Candidatus Koribacter;s__uncultured bacterium
ASV10422	4	0	0	0	0	0	0	0	0	0	177.19	0	0	0	0	0	0	0	0	0	35.438	0.001	-15.113	0.125007	0.349364	d__Bacteria;p__Acidobacteria;c__Acidobacteriia;o__Acidobacteriales;f__Acidobacteriaceae;g__Candidatus Koribacter;s__uncultured bacterium
ASV10423	0	0	0	0	0	0	0	0	4	0	0	0	0	0	0	0	0	0	185.43	0	0.001	37.086	15.1786	0.0625063	0.332325	Unclassified
ASV10424	0	0	0	0	0	0	4	0	0	0	0	0	0	0	0	0	169.03	0	0	0	0.001	33.806	15.045	0.125007	0.349364	d__Bacteria;p__Verrucomicrobia;c__Spartobacteria;o__Chthoniobacterales;f__Chthoniobacteraceae;g__Chthoniobacter;s__Chthoniobacter flavus
ASV10425	0	0	0	0	0	0	0	0	4	0	0	0	0	0	0	0	0	0	185.43	0	0.001	37.086	15.1786	0.0625063	0.332325	d__Bacteria;p__Proteobacteria;c__Deltaproteobacteria;o__Myxococcales;f__Kofleriaceae;g__Haliangium;s__uncultured bacterium
ASV10426	0	0	0	0	0	0	0	0	4	0	0	0	0	0	0	0	0	0	185.43	0	0.001	37.086	15.1786	0.0625063	0.332325	d__Bacteria;p__Acidobacteria;c__Acidobacteriia;o__Acidobacteriales;f__Acidobacteriaceae;g__Candidatus Koribacter;s__uncultured bacterium
ASV10427	4	0	0	0	0	0	0	0	0	0	177.19	0	0	0	0	0	0	0	0	0	35.438	0.001	-15.113	0.125007	0.349364	d__Bacteria;p__Planctomycetes;c__Planctomycetia;o__Gemmatales;f__Gemmataceae;g__Fimbriiglobus;s__Fimbriiglobus ruber
ASV10428	0	4	0	0	0	0	0	0	0	0	0	180.35	0	0	0	0	0	0	0	0	36.07	0.001	-15.1385	0.125007	0.349364	d__Bacteria;p__Verrucomicrobia;c__Verrucomicrobiae;o__Verrucomicrobiales;f__Verrucomicrobia subdivision 3;g__Pedosphaera;s__uncultured Verrucomicrobia bacterium
ASV10429	0	0	0	0	0	0	0	0	4	0	0	0	0	0	0	0	0	0	185.43	0	0.001	37.086	15.1786	0.0625063	0.332325	d__Bacteria;p__Proteobacteria;c__Alphaproteobacteria;o__Hyphomicrobiales;f__Hyphomicrobiaceae;g__Hyphomicrobium;s__Hyphomicrobium facile
ASV1043	0	0	0	17	0	0	0	0	0	0	0	0	0	787.84	0	0	0	0	0	0	157.568	0.001	-17.2656	7.64107e-06	0.000371087	d__Bacteria;p__Planctomycetes;c__Phycisphaerae;o__Tepidisphaerales;f__Tepidisphaeraceae;g__Tepidisphaera;s__Tepidisphaera mucosa
ASV10430	0	0	0	0	0	0	4	0	0	0	0	0	0	0	0	0	169.03	0	0	0	0.001	33.806	15.045	0.125007	0.349364	d__Bacteria;p__Gemmatimonadetes;c__Gemmatimonadetes;o__Gemmatimonadales;f__Gemmatimonadaceae;g__Gemmatirosa;s__Gemmatirosa kalamazoonesis
ASV10431	0	4	0	0	0	0	0	0	0	0	0	180.35	0	0	0	0	0	0	0	0	36.07	0.001	-15.1385	0.125007	0.349364	d__Bacteria;p__Proteobacteria;c__Alphaproteobacteria;o__Hyphomicrobiales;f__Xanthobacteraceae;g__Pseudolabrys;s__uncultured bacterium
ASV10432	0	0	0	0	4	0	0	0	0	0	0	0	0	0	190.97	0	0	0	0	0	38.194	0.001	-15.2211	0.00781469	0.0892477	d__Bacteria;p__Proteobacteria;c__Betaproteobacteria;o__Burkholderiales;f__Comamonadaceae;g__Variovorax;s__Variovorax sp003019815
ASV10433	0	4	0	0	0	0	0	0	0	0	0	180.35	0	0	0	0	0	0	0	0	36.07	0.001	-15.1385	0.125007	0.349364	d__Bacteria;p__Planctomycetes;c__Planctomycetia;o__Pirellulales;f__Pirellulaceae;g__Pirellula;s__uncultured bacterium
ASV10434	0	0	4	0	0	0	0	0	0	0	0	0	168.72	0	0	0	0	0	0	0	33.744	0.001	-15.0423	0.250007	0.441558	d__Bacteria;p__Acidobacteria;c__Acidobacteriia;o__Acidobacteriales;f__Acidobacteriaceae;g__Silvibacterium;s__Silvibacterium dinghuense
ASV10435	0	0	0	4	0	0	0	0	0	0	0	0	0	185.37	0	0	0	0	0	0	37.074	0.001	-15.1781	0.0625063	0.332325	d__Bacteria;p__Planctomycetes;c__Phycisphaerae;o__Sedimentisphaerales;f__Anaerohalosphaeraceae;g__Anaerohalosphaera;s__Anaerohalosphaera lusitana
ASV10436	0	4	0	0	0	0	0	0	0	0	0	180.35	0	0	0	0	0	0	0	0	36.07	0.001	-15.1385	0.125007	0.349364	d__Bacteria;p__Proteobacteria;c__Alphaproteobacteria;o__Caulobacterales;f__Caulobacteraceae;g__Phenylobacterium;s__uncultured bacterium
ASV10437	0	0	0	0	0	0	0	0	4	0	0	0	0	0	0	0	0	0	185.43	0	0.001	37.086	15.1786	0.0625063	0.332325	d__Bacteria;p__Proteobacteria;c__Betaproteobacteria;o__Burkholderiales;f__norank
ASV10438	0	0	0	0	0	0	4	0	0	0	0	0	0	0	0	0	169.03	0	0	0	0.001	33.806	15.045	0.125007	0.349364	d__Bacteria;p__Proteobacteria;c__Betaproteobacteria;o__Rhodocyclales;f__Rhodocyclaceae;g__Rhodocyclus;s__Rhodocyclus tenuis_A
ASV10439	0	0	0	0	0	4	0	0	0	0	0	0	0	0	0	221.9	0	0	0	0	0.001	44.38	15.4376	0.0625063	0.332325	d__Bacteria;p__Proteobacteria;c__Deltaproteobacteria;o__Myxococcales;f__Labilitrichaceae;g__Labilithrix;s__Labilithrix luteola
ASV1044	0	0	0	17	0	0	0	0	0	0	0	0	0	787.84	0	0	0	0	0	0	157.568	0.001	-17.2656	7.64107e-06	0.000371087	d__Bacteria;p__Acidobacteria;c__Acidobacteriia;o__Acidobacteriales;f__Acidobacteriaceae;g__Edaphobacter;s__uncultured Acidobacteria bacterium
ASV10440	0	0	0	0	0	0	0	0	0	4	0	0	0	0	0	0	0	0	0	178.95	0.001	35.79	15.1273	0.250007	0.441558	d__Bacteria;p__Candidatus Saccharibacteria;c__norank;o__norank;f__norank;g__Candidatus Saccharimonas;s__Saccharimonas aalborgensis
ASV10441	0	0	0	4	0	0	0	0	0	0	0	0	0	185.37	0	0	0	0	0	0	37.074	0.001	-15.1781	0.0625063	0.332325	d__Bacteria;p__Planctomycetes;c__Planctomycetia;o__Pirellulales;f__Pirellulaceae;g__Rhodopirellula;s__uncultured bacterium
ASV10442	0	0	0	0	0	0	0	0	4	0	0	0	0	0	0	0	0	0	185.43	0	0.001	37.086	15.1786	0.0625063	0.332325	d__Bacteria;p__Acidobacteria;c__Acidobacteriia;o__Bryobacterales;f__Solibacteraceae;g__Candidatus Solibacter;s__Solibacter usitatus
ASV10443	0	0	0	4	0	0	0	0	0	0	0	0	0	185.37	0	0	0	0	0	0	37.074	0.001	-15.1781	0.0625063	0.332325	d__Bacteria;p__Acidobacteria;c__Acidobacteriia;o__Acidobacteriales;f__Acidobacteriaceae;g__Candidatus Koribacter;s__uncultured bacterium
ASV10444	0	0	4	0	0	0	0	0	0	0	0	0	168.72	0	0	0	0	0	0	0	33.744	0.001	-15.0423	0.250007	0.441558	Unclassified
ASV10445	0	0	4	0	0	0	0	0	0	0	0	0	168.72	0	0	0	0	0	0	0	33.744	0.001	-15.0423	0.250007	0.441558	d__Bacteria;p__Chloroflexi;c__Ktedonobacteria;o__Ktedonobacterales;f__Ktedonosporobacteraceae;g__Ktedonosporobacter;s__Ktedonosporobacter rubrisoli
ASV10446	0	4	0	0	0	0	0	0	0	0	0	180.35	0	0	0	0	0	0	0	0	36.07	0.001	-15.1385	0.125007	0.349364	d__Bacteria;p__Chloroflexi;c__Anaerolineae;o__Anaerolineales;f__Anaerolineaceae;g__Longilinea;s__Longilinea arvoryzae
ASV10447	4	0	0	0	0	0	0	0	0	0	177.19	0	0	0	0	0	0	0	0	0	35.438	0.001	-15.113	0.125007	0.349364	d__Bacteria;p__Proteobacteria;c__Gammaproteobacteria;o__Legionellales;f__Legionellaceae;g__Tatlockia;s__Tatlockia lansingensis
ASV10448	0	0	0	0	0	0	4	0	0	0	0	0	0	0	0	0	169.03	0	0	0	0.001	33.806	15.045	0.125007	0.349364	d__Bacteria;p__Chloroflexi;c__Ktedonobacteria;o__Thermogemmatisporales;f__Thermogemmatisporaceae;g__Thermogemmatispora;s__Thermogemmatispora carboxidivorans
ASV10449	0	0	4	0	0	0	0	0	0	0	0	0	168.72	0	0	0	0	0	0	0	33.744	0.001	-15.0423	0.250007	0.441558	d__Bacteria;p__Bacteroidetes;c__Sphingobacteriia;o__Sphingobacteriales;f__Sphingobacteriaceae;g__Mucilaginibacter;s__uncultured bacterium
ASV1045	0	0	17	0	0	0	0	0	0	0	0	0	717.06	0	0	0	0	0	0	0	143.412	0.001	-17.1298	0.0009771	0.0195951	d__Bacteria;p__Acidobacteria;c__Acidobacteriia;o__Bryobacterales;f__Solibacteraceae;g__Candidatus Solibacter;s__Solibacter usitatus
ASV10450	0	0	0	0	0	4	0	0	0	0	0	0	0	0	0	221.9	0	0	0	0	0.001	44.38	15.4376	0.0625063	0.332325	d__Bacteria;p__Proteobacteria;c__Betaproteobacteria;o__Burkholderiales;f__Comamonadaceae;g__Ramlibacter;s__Ramlibacter sp013778345
ASV10451	0	0	0	0	4	0	0	0	0	0	0	0	0	0	190.97	0	0	0	0	0	38.194	0.001	-15.2211	0.00781469	0.0892477	d__Bacteria;p__Proteobacteria;c__Alphaproteobacteria;o__Micropepsales;f__Micropepsaceae;g__Rhizomicrobium;s__Rhizomicrobium sp013149165
ASV10452	0	4	0	0	0	0	0	0	0	0	0	180.35	0	0	0	0	0	0	0	0	36.07	0.001	-15.1385	0.125007	0.349364	d__Bacteria;p__Proteobacteria;c__Alphaproteobacteria;o__Hyphomicrobiales;f__Xanthobacteraceae;g__Labrys;s__Labrys neptuniae
ASV10453	0	0	0	4	0	0	0	0	0	0	0	0	0	185.37	0	0	0	0	0	0	37.074	0.001	-15.1781	0.0625063	0.332325	d__Bacteria;p__Nitrospirae;c__Nitrospira;o__Nitrospirales;f__Nitrospiraceae;g__Leptospirillum;s__Leptospirillum ferrooxidans
ASV10454	0	0	0	0	4	0	0	0	0	0	0	0	0	0	190.97	0	0	0	0	0	38.194	0.001	-15.2211	0.00781469	0.0892477	d__Bacteria;p__Bacteroidetes;c__Sphingobacteriia;o__Sphingobacteriales;f__Sphingobacteriaceae;g__Mucilaginibacter;s__Mucilaginibacter sp003576455
ASV10455	0	0	0	0	4	0	0	0	0	0	0	0	0	0	190.97	0	0	0	0	0	38.194	0.001	-15.2211	0.00781469	0.0892477	d__Bacteria;p__Acidobacteria;c__Acidobacteriia;o__Acidobacteriales;f__Acidobacteriaceae;g__Candidatus Koribacter;s__Koribacter versatilis
ASV10456	0	4	0	0	0	0	0	0	0	0	0	180.35	0	0	0	0	0	0	0	0	36.07	0.001	-15.1385	0.125007	0.349364	Unclassified
ASV10457	0	0	0	0	0	4	0	0	0	0	0	0	0	0	0	221.9	0	0	0	0	0.001	44.38	15.4376	0.0625063	0.332325	d__Bacteria;p__Proteobacteria;c__Alphaproteobacteria;o__Rickettsiales;f__Anaplasmataceae;g__Wolbachia;s__Wolbachia sp902636535
ASV10458	4	0	0	0	0	0	0	0	0	0	177.19	0	0	0	0	0	0	0	0	0	35.438	0.001	-15.113	0.125007	0.349364	d__Bacteria;p__Planctomycetes;c__Planctomycetia;o__Pirellulales;f__Lacipirellulaceae
ASV10459	0	4	0	0	0	0	0	0	0	0	0	180.35	0	0	0	0	0	0	0	0	36.07	0.001	-15.1385	0.125007	0.349364	d__Bacteria;p__Bacteroidetes;c__Sphingobacteriia;o__Sphingobacteriales;f__Sphingobacteriaceae;g__Daejeonella;s__Daejeonella sp002257025
ASV1046	0	0	0	0	17	0	0	0	0	0	0	0	0	0	811.61	0	0	0	0	0	162.322	0.001	-17.3085	1.87076e-09	2.33687e-07	d__Bacteria;p__Bacteroidetes;c__Sphingobacteriia;o__Sphingobacteriales;f__Sphingobacteriaceae;g__Mucilaginibacter;s__uncultured bacterium
ASV10460	0	4	0	0	0	0	0	0	0	0	0	180.35	0	0	0	0	0	0	0	0	36.07	0.001	-15.1385	0.125007	0.349364	d__Bacteria;p__Planctomycetes;c__Planctomycetia;o__Planctomycetales;f__Planctomycetaceae;g__Schlesneria;s__Schlesneria sp903904835
ASV10461	0	4	0	0	0	0	0	0	0	0	0	180.35	0	0	0	0	0	0	0	0	36.07	0.001	-15.1385	0.125007	0.349364	d__Bacteria;p__Acidobacteria;c__Acidobacteriia;o__Acidobacteriales;f__Acidobacteriaceae;g__Granulicella
ASV10462	0	4	0	0	0	0	0	0	0	0	0	180.35	0	0	0	0	0	0	0	0	36.07	0.001	-15.1385	0.125007	0.349364	d__Bacteria;p__Planctomycetes;c__Planctomycetia;o__Isosphaerales;f__Isosphaeraceae;g__Aquisphaera;s__Aquisphaera giovannonii
ASV10463	0	0	0	0	0	0	4	0	0	0	0	0	0	0	0	0	169.03	0	0	0	0.001	33.806	15.045	0.125007	0.349364	d__Bacteria;p__Actinobacteria;c__Thermoleophilia;o__Solirubrobacterales;f__Solirubrobacteraceae;g__Solirubrobacter;s__uncultured bacterium
ASV10464	0	0	0	0	4	0	0	0	0	0	0	0	0	0	190.97	0	0	0	0	0	38.194	0.001	-15.2211	0.00781469	0.0892477	d__Bacteria;p__Proteobacteria;c__Alphaproteobacteria;o__Caulobacterales;f__Caulobacteraceae;g__Phenylobacterium;s__Phenylobacterium sp001557235
ASV10465	0	0	4	0	0	0	0	0	0	0	0	0	168.72	0	0	0	0	0	0	0	33.744	0.001	-15.0423	0.250007	0.441558	d__Bacteria;p__Acidobacteria;c__Acidobacteriia;o__Acidobacteriales;f__Acidobacteriaceae;g__Silvibacterium;s__Silvibacterium bohemicum
ASV10466	0	0	0	0	0	0	0	0	4	0	0	0	0	0	0	0	0	0	185.43	0	0.001	37.086	15.1786	0.0625063	0.332325	d__Bacteria;p__Proteobacteria;c__Deltaproteobacteria;o__Desulfuromonadales;f__Geobacteraceae;g__Geobacter;s__Trichlorobacter thiogenes
ASV10467	0	4	0	0	0	0	0	0	0	0	0	180.35	0	0	0	0	0	0	0	0	36.07	0.001	-15.1385	0.125007	0.349364	d__Bacteria;p__Planctomycetes;c__Phycisphaerae;o__Phycisphaerales;f__Phycisphaeraceae;g__Phycisphaera;s__uncultured bacterium
ASV10468	0	0	0	0	0	0	0	0	4	0	0	0	0	0	0	0	0	0	185.43	0	0.001	37.086	15.1786	0.0625063	0.332325	d__Bacteria;p__Acidobacteria;c__Acidobacteriia;o__Acidobacteriales;f__Acidobacteriaceae;g__Candidatus Koribacter;s__uncultured bacterium
ASV10469	4	0	0	0	0	0	0	0	0	0	177.19	0	0	0	0	0	0	0	0	0	35.438	0.001	-15.113	0.125007	0.349364	d__Bacteria;p__Proteobacteria;c__Alphaproteobacteria;o__Hyphomicrobiales;f__Bradyrhizobiaceae;g__Rhodopseudomonas;s__Rhodopseudomonas palustris
ASV1047	0	0	0	0	17	0	0	0	0	0	0	0	0	0	811.61	0	0	0	0	0	162.322	0.001	-17.3085	1.87076e-09	2.33687e-07	d__Bacteria;p__Bacteroidetes;c__Chitinophagia;o__Chitinophagales;f__Chitinophagaceae;g__Sediminibacterium;s__Sediminibacterium magnilacihabitans
ASV10470	0	4	0	0	0	0	0	0	0	0	0	180.35	0	0	0	0	0	0	0	0	36.07	0.001	-15.1385	0.125007	0.349364	d__Bacteria;p__Chloroflexi;c__Ktedonobacteria;o__Thermogemmatisporales;f__Thermogemmatisporaceae;g__Thermogemmatispora;s__Thermogemmatispora carboxidivorans
ASV10471	0	4	0	0	0	0	0	0	0	0	0	180.35	0	0	0	0	0	0	0	0	36.07	0.001	-15.1385	0.125007	0.349364	d__Bacteria;p__Proteobacteria;c__Gammaproteobacteria;o__Xanthomonadales;f__Xanthomonadaceae;g__Luteimonas;s__Luteimonas abyssi
ASV10472	0	0	4	0	0	0	0	0	0	0	0	0	168.72	0	0	0	0	0	0	0	33.744	0.001	-15.0423	0.250007	0.441558	d__Bacteria;p__Proteobacteria;c__Deltaproteobacteria;o__Desulfuromonadales;f__Geobacteraceae;g__Geomonas;s__Geomonas sp000023645
ASV10473	0	4	0	0	0	0	0	0	0	0	0	180.35	0	0	0	0	0	0	0	0	36.07	0.001	-15.1385	0.125007	0.349364	d__Bacteria;p__Acidobacteria;c__Acidobacteriia;o__Acidobacteriales;f__Acidobacteriaceae;g__Terracidiphilus;s__Terracidiphilus sp903849645
ASV10474	0	0	0	0	0	4	0	0	0	0	0	0	0	0	0	221.9	0	0	0	0	0.001	44.38	15.4376	0.0625063	0.332325	d__Bacteria;p__Planctomycetes;c__Planctomycetia;o__Pirellulales;f__Pirellulaceae;g__Bremerella;s__Bremerella marina_B
ASV10475	0	0	0	0	0	4	0	0	0	0	0	0	0	0	0	221.9	0	0	0	0	0.001	44.38	15.4376	0.0625063	0.332325	d__Bacteria;p__Bacteroidetes;c__Cytophagia;o__Cytophagales;f__Cytophagaceae;g__Sporocytophaga;s__uncultured bacterium
ASV10476	0	4	0	0	0	0	0	0	0	0	0	180.35	0	0	0	0	0	0	0	0	36.07	0.001	-15.1385	0.125007	0.349364	d__Bacteria;p__Proteobacteria;c__Gammaproteobacteria;o__Xanthomonadales;f__Xanthomonadaceae;g__Arenimonas;s__Arenimonas composti
ASV10477	0	0	0	0	0	0	4	0	0	0	0	0	0	0	0	0	169.03	0	0	0	0.001	33.806	15.045	0.125007	0.349364	d__Bacteria;p__Proteobacteria;c__Alphaproteobacteria;o__Micropepsales;f__Micropepsaceae;g__Rhizomicrobium;s__Rhizomicrobium sp013149165
ASV10478	0	0	0	4	0	0	0	0	0	0	0	0	0	185.37	0	0	0	0	0	0	37.074	0.001	-15.1781	0.0625063	0.332325	d__Bacteria;p__Chloroflexi;c__Ktedonobacteria;o__Ktedonobacterales;f__Dictyobacteraceae;g__Dictyobacter;s__Dictyobacter kobayashii
ASV10479	0	0	0	0	0	0	4	0	0	0	0	0	0	0	0	0	169.03	0	0	0	0.001	33.806	15.045	0.125007	0.349364	d__Bacteria;p__Acidobacteria;c__Acidobacteriia;o__Acidobacteriales;f__Acidobacteriaceae;g__Candidatus Koribacter;s__uncultured bacterium
ASV1048	0	0	0	17	0	0	0	0	0	0	0	0	0	787.84	0	0	0	0	0	0	157.568	0.001	-17.2656	7.64107e-06	0.000371087	d__Bacteria;p__Proteobacteria;c__Betaproteobacteria;o__Burkholderiales;f__Oxalobacteraceae;g__Duganella;s__Duganella sp000335815
ASV10480	0	0	0	4	0	0	0	0	0	0	0	0	0	185.37	0	0	0	0	0	0	37.074	0.001	-15.1781	0.0625063	0.332325	d__Bacteria;p__Verrucomicrobia;c__Spartobacteria;o__Chthoniobacterales;f__Chthoniobacteraceae;g__Chthoniobacter;s__Chthoniobacter flavus
ASV10481	0	0	0	0	0	0	0	0	4	0	0	0	0	0	0	0	0	0	185.43	0	0.001	37.086	15.1786	0.0625063	0.332325	d__Bacteria;p__Proteobacteria;c__Alphaproteobacteria;o__Hyphomicrobiales;f__Xanthobacteraceae;g__Pseudolabrys;s__uncultured bacterium
ASV10482	0	0	0	0	0	0	0	0	4	0	0	0	0	0	0	0	0	0	185.43	0	0.001	37.086	15.1786	0.0625063	0.332325	d__Bacteria;p__Bacteroidetes;c__Chitinophagia;o__Chitinophagales;f__Chitinophagaceae;g__Puia;s__uncultured bacterium
ASV10483	0	0	0	0	0	0	0	0	4	0	0	0	0	0	0	0	0	0	185.43	0	0.001	37.086	15.1786	0.0625063	0.332325	Unclassified
ASV10484	0	0	4	0	0	0	0	0	0	0	0	0	168.72	0	0	0	0	0	0	0	33.744	0.001	-15.0423	0.250007	0.441558	d__Bacteria;p__Proteobacteria;c__Betaproteobacteria;o__Burkholderiales;f__Burkholderiaceae;g__Chitinimonas;s__Chitinimonas taiwanensis
ASV10485	0	0	0	4	0	0	0	0	0	0	0	0	0	185.37	0	0	0	0	0	0	37.074	0.001	-15.1781	0.0625063	0.332325	d__Bacteria;p__Planctomycetes;c__Phycisphaerae;o__Tepidisphaerales;f__Tepidisphaeraceae;g__Tepidisphaera;s__Tepidisphaera mucosa
ASV10486	0	0	0	0	4	0	0	0	0	0	0	0	0	0	190.97	0	0	0	0	0	38.194	0.001	-15.2211	0.00781469	0.0892477	d__Bacteria;p__Acidobacteria;c__Acidobacteriia;o__Acidobacteriales;f__Acidobacteriaceae;g__Candidatus Koribacter;s__uncultured Acidobacteria bacterium
ASV10487	0	0	0	0	4	0	0	0	0	0	0	0	0	0	190.97	0	0	0	0	0	38.194	0.001	-15.2211	0.00781469	0.0892477	d__Bacteria;p__Proteobacteria;c__Alphaproteobacteria;o__Rhodospirillales;f__Rhodospirillaceae;g__Hypericibacter;s__Hypericibacter adhaerens
ASV10488	0	0	4	0	0	0	0	0	0	0	0	0	168.72	0	0	0	0	0	0	0	33.744	0.001	-15.0423	0.250007	0.441558	d__Bacteria;p__Acidobacteria;c__Acidobacteriia;o__Acidobacteriales;f__Acidobacteriaceae;g__Candidatus Koribacter;s__Koribacter versatilis
ASV10489	0	4	0	0	0	0	0	0	0	0	0	180.35	0	0	0	0	0	0	0	0	36.07	0.001	-15.1385	0.125007	0.349364	d__Bacteria;p__Proteobacteria;c__Alphaproteobacteria;o__Sphingomonadales;f__Sphingomonadaceae;g__Novosphingobium;s__Novosphingobium sp005145025
ASV1049	0	0	0	0	0	0	0	0	17	0	0	0	0	0	0	0	0	0	788.1	0	0.001	157.62	17.2661	1.91098e-06	0.000112236	d__Bacteria;p__Nitrospirae;c__Nitrospira;o__Nitrospirales;f__Nitrospiraceae;g__Leptospirillum;s__Leptospirillum ferrooxidans
ASV10490	0	0	0	4	0	0	0	0	0	0	0	0	0	185.37	0	0	0	0	0	0	37.074	0.001	-15.1781	0.0625063	0.332325	d__Bacteria;p__Proteobacteria;c__Oligoflexia;o__Bacteriovoracales;f__Bacteriovoracaceae;g__Peredibacter;s__uncultured delta proteobacterium
ASV10491	0	0	0	0	0	0	0	0	0	4	0	0	0	0	0	0	0	0	0	178.95	0.001	35.79	15.1273	0.250007	0.441558	d__Bacteria;p__Bacteroidetes;c__Cytophagia;o__Cytophagales;f__Fulvivirgaceae;g__Ohtaekwangia;s__Ohtaekwangia koreensis
ASV10492	0	0	0	4	0	0	0	0	0	0	0	0	0	185.37	0	0	0	0	0	0	37.074	0.001	-15.1781	0.0625063	0.332325	Unclassified
ASV10493	4	0	0	0	0	0	0	0	0	0	177.19	0	0	0	0	0	0	0	0	0	35.438	0.001	-15.113	0.125007	0.349364	d__Bacteria;p__Proteobacteria;c__Alphaproteobacteria;o__Hyphomicrobiales;f__Roseiarcaceae;g__Roseiarcus;s__uncultured bacterium
ASV10494	0	0	4	0	0	0	0	0	0	0	0	0	168.72	0	0	0	0	0	0	0	33.744	0.001	-15.0423	0.250007	0.441558	d__Bacteria;p__Verrucomicrobia;c__Verrucomicrobiae;o__Verrucomicrobiales;f__Verrucomicrobia subdivision 3;g__Pedosphaera;s__uncultured bacterium
ASV10495	0	4	0	0	0	0	0	0	0	0	0	180.35	0	0	0	0	0	0	0	0	36.07	0.001	-15.1385	0.125007	0.349364	d__Bacteria;p__Verrucomicrobia;c__Verrucomicrobiae;o__Verrucomicrobiales;f__Verrucomicrobia subdivision 3;g__Pedosphaera;s__uncultured Verrucomicrobia bacterium
ASV10496	4	0	0	0	0	0	0	0	0	0	177.19	0	0	0	0	0	0	0	0	0	35.438	0.001	-15.113	0.125007	0.349364	d__Bacteria;p__Proteobacteria;c__Gammaproteobacteria;o__Acidiferrobacterales;f__Acidiferrobacteraceae;g__Sulfurifustis;s__Sulfurifustis variabilis
ASV10497	0	0	0	0	4	0	0	0	0	0	0	0	0	0	190.97	0	0	0	0	0	38.194	0.001	-15.2211	0.00781469	0.0892477	d__Bacteria;p__Proteobacteria;c__Alphaproteobacteria;o__Sphingomonadales;f__Sphingomonadaceae;g__Sphingomonas;s__Sphingomonas mali
ASV10498	4	0	0	0	0	0	0	0	0	0	177.19	0	0	0	0	0	0	0	0	0	35.438	0.001	-15.113	0.125007	0.349364	d__Bacteria;p__Bacteroidetes;c__Chitinophagia;o__Chitinophagales;f__Chitinophagaceae;g__Puia;s__uncultured bacterium
ASV10499	0	0	0	0	0	0	0	0	0	4	0	0	0	0	0	0	0	0	0	178.95	0.001	35.79	15.1273	0.250007	0.441558	d__Bacteria;p__Planctomycetes;c__Planctomycetia;o__Gemmatales;f__Gemmataceae;g__Fimbriiglobus;s__Fimbriiglobus ruber
ASV105	0	0	74	0	0	0	0	0	0	0	0	0	3121.31	0	0	0	0	0	0	0	624.262	0.001	-19.2518	3.59472e-15	1.04949e-12	d__Bacteria;p__Armatimonadetes;c__Armatimonadia;o__Capsulimonadales;f__Capsulimonadaceae;g__Capsulimonas;s__Capsulimonas corticalis
ASV1050	0	0	0	0	0	0	0	0	0	17	0	0	0	0	0	0	0	0	0	760.52	0.001	152.104	17.2147	0.000244331	0.00670089	d__Bacteria;p__Proteobacteria;c__Betaproteobacteria;o__Burkholderiales;f__Comamonadaceae;g__Hylemonella;s__Hylemonella sp001432305
ASV10500	0	0	0	0	0	0	0	0	4	0	0	0	0	0	0	0	0	0	185.43	0	0.001	37.086	15.1786	0.0625063	0.332325	d__Bacteria;p__Proteobacteria;c__Alphaproteobacteria;o__Rhodospirillales;f__Azospirillaceae;g__Nitrospirillum;s__Nitrospirillum sp000333275
ASV10501	0	0	0	0	0	4	0	0	0	0	0	0	0	0	0	221.9	0	0	0	0	0.001	44.38	15.4376	0.0625063	0.332325	d__Bacteria;p__Acidobacteria;c__Acidobacteriia;o__Acidobacteriales;f__Acidobacteriaceae;g__Candidatus Koribacter;s__uncultured Acidobacteria bacterium
ASV10502	0	0	0	0	4	0	0	0	0	0	0	0	0	0	190.97	0	0	0	0	0	38.194	0.001	-15.2211	0.00781469	0.0892477	d__Bacteria;p__Gemmatimonadetes;c__Gemmatimonadetes;o__Gemmatimonadales;f__Gemmatimonadaceae;g__Gemmatirosa;s__Gemmatirosa kalamazoonesis
ASV10503	4	0	0	0	0	0	0	0	0	0	177.19	0	0	0	0	0	0	0	0	0	35.438	0.001	-15.113	0.125007	0.349364	d__Bacteria;p__Planctomycetes;c__Planctomycetia;o__Pirellulales;f__Pirellulaceae
ASV10504	0	0	0	0	0	0	0	0	0	4	0	0	0	0	0	0	0	0	0	178.95	0.001	35.79	15.1273	0.250007	0.441558	d__Bacteria;p__Proteobacteria;c__Alphaproteobacteria;o__Hyphomicrobiales;f__Bradyrhizobiaceae;g__Bradyrhizobium;s__Bradyrhizobium canariense_A
ASV10505	0	0	0	4	0	0	0	0	0	0	0	0	0	185.37	0	0	0	0	0	0	37.074	0.001	-15.1781	0.0625063	0.332325	d__Bacteria;p__Candidatus Omnitrophica;c__norank;o__norank;f__norank;g__Candidatus Omnitrophus;s__uncultured planctomycete
ASV10506	0	0	0	0	0	0	0	0	4	0	0	0	0	0	0	0	0	0	185.43	0	0.001	37.086	15.1786	0.0625063	0.332325	d__Bacteria;p__Acidobacteria;c__Acidobacteriia;o__Acidobacteriales;f__Acidobacteriaceae
ASV10507	4	0	0	0	0	0	0	0	0	0	177.19	0	0	0	0	0	0	0	0	0	35.438	0.001	-15.113	0.125007	0.349364	d__Bacteria;p__Proteobacteria;c__Alphaproteobacteria;o__Sphingomonadales;f__Sphingomonadaceae;g__Allosphingosinicella;s__Allosphingosinicella sp013816585
ASV10508	4	0	0	0	0	0	0	0	0	0	177.19	0	0	0	0	0	0	0	0	0	35.438	0.001	-15.113	0.125007	0.349364	d__Bacteria;p__Acidobacteria;c__Acidobacteriia;o__Acidobacteriales;f__Acidobacteriaceae;g__Terracidiphilus;s__Terracidiphilus sp903849645
ASV10509	0	0	4	0	0	0	0	0	0	0	0	0	168.72	0	0	0	0	0	0	0	33.744	0.001	-15.0423	0.250007	0.441558	d__Bacteria;p__Acidobacteria;c__Acidobacteriia;o__Acidobacteriales;f__Acidobacteriaceae;g__Terracidiphilus;s__Terracidiphilus sp903849645
ASV1051	0	0	0	0	0	17	0	0	0	0	0	0	0	0	0	943.08	0	0	0	0	0.001	188.616	17.5251	1.91098e-06	0.000112236	d__Bacteria;p__Acidobacteria;c__Vicinamibacteria;o__norank;f__Vicinamibacteraceae;g__Vicinamibacter;s__uncultured bacterium
ASV10510	0	0	0	0	0	0	4	0	0	0	0	0	0	0	0	0	169.03	0	0	0	0.001	33.806	15.045	0.125007	0.349364	d__Bacteria;p__Planctomycetes;c__Planctomycetia;o__Pirellulales;f__Pirellulaceae;g__Bremerella;s__Bremerella marina_A
ASV10511	0	0	0	0	0	0	4	0	0	0	0	0	0	0	0	0	169.03	0	0	0	0.001	33.806	15.045	0.125007	0.349364	d__Bacteria;p__Proteobacteria;c__Alphaproteobacteria;o__Sphingomonadales;f__Erythrobacteraceae;g__Altererythrobacter;s__uncultured bacterium
ASV10512	0	0	0	0	0	0	0	0	4	0	0	0	0	0	0	0	0	0	185.43	0	0.001	37.086	15.1786	0.0625063	0.332325	d__Bacteria;p__Proteobacteria;c__Alphaproteobacteria;o__Rhodospirillales;f__Rhodospirillaceae;g__Hypericibacter;s__Hypericibacter adhaerens
ASV10513	0	0	0	0	0	0	0	0	4	0	0	0	0	0	0	0	0	0	185.43	0	0.001	37.086	15.1786	0.0625063	0.332325	d__Bacteria;p__Proteobacteria;c__Alphaproteobacteria;o__Caulobacterales;f__Caulobacteraceae;g__Phenylobacterium;s__uncultured bacterium
ASV10514	4	0	0	0	0	0	0	0	0	0	177.19	0	0	0	0	0	0	0	0	0	35.438	0.001	-15.113	0.125007	0.349364	d__Bacteria;p__Proteobacteria;c__Alphaproteobacteria;o__Hyphomicrobiales;f__Aurantimonadaceae;g__Aureimonas;s__Aureimonas sp014058705
ASV10515	0	0	0	0	0	4	0	0	0	0	0	0	0	0	0	221.9	0	0	0	0	0.001	44.38	15.4376	0.0625063	0.332325	d__Bacteria;p__Proteobacteria;c__Deltaproteobacteria;o__Myxococcales;f__Labilitrichaceae;g__Labilithrix;s__Labilithrix luteola
ASV10516	4	0	0	0	0	0	0	0	0	0	177.19	0	0	0	0	0	0	0	0	0	35.438	0.001	-15.113	0.125007	0.349364	d__Bacteria;p__Planctomycetes;c__Planctomycetia;o__Gemmatales;f__Gemmataceae;g__Fimbriiglobus;s__Fimbriiglobus ruber
ASV10517	0	0	0	0	0	0	0	0	4	0	0	0	0	0	0	0	0	0	185.43	0	0.001	37.086	15.1786	0.0625063	0.332325	d__Bacteria;p__Proteobacteria;c__Deltaproteobacteria;o__Desulfuromonadales;f__Geobacteraceae;g__Geobacter;s__Geobacter metallireducens
ASV10518	0	0	4	0	0	0	0	0	0	0	0	0	168.72	0	0	0	0	0	0	0	33.744	0.001	-15.0423	0.250007	0.441558	d__Bacteria;p__Actinobacteria;c__Actinomycetia;o__Streptosporangiales;f__Streptosporangiaceae;g__Streptosporangium;s__Streptosporangium roseum
ASV10519	0	0	0	4	0	0	0	0	0	0	0	0	0	185.37	0	0	0	0	0	0	37.074	0.001	-15.1781	0.0625063	0.332325	d__Bacteria;p__Proteobacteria;c__Deltaproteobacteria;o__Myxococcales;f__Anaeromyxobacteraceae;g__Anaeromyxobacter;s__Anaeromyxobacter dehalogenans
ASV1052	0	0	17	0	0	0	0	0	0	0	0	0	717.06	0	0	0	0	0	0	0	143.412	0.001	-17.1298	0.0009771	0.0195951	d__Bacteria;p__Proteobacteria;c__Alphaproteobacteria;o__Micropepsales;f__Micropepsaceae;g__Rhizomicrobium;s__Rhizomicrobium sp013149165
ASV10520	0	0	0	0	0	0	4	0	0	0	0	0	0	0	0	0	169.03	0	0	0	0.001	33.806	15.045	0.125007	0.349364	d__Bacteria;p__Proteobacteria;c__Deltaproteobacteria;o__Desulfuromonadales;f__Geobacteraceae;g__Geobacter;s__Trichlorobacter thiogenes
ASV10521	0	0	0	0	0	0	0	0	4	0	0	0	0	0	0	0	0	0	185.43	0	0.001	37.086	15.1786	0.0625063	0.332325	d__Bacteria;p__Firmicutes;c__Clostridia;o__Eubacteriales;f__Peptococcaceae;g__Thermincola;s__Thermincola ferriacetica
ASV10522	0	0	0	4	0	0	0	0	0	0	0	0	0	185.37	0	0	0	0	0	0	37.074	0.001	-15.1781	0.0625063	0.332325	Unclassified
ASV10523	0	0	0	0	0	0	0	0	4	0	0	0	0	0	0	0	0	0	185.43	0	0.001	37.086	15.1786	0.0625063	0.332325	d__Bacteria;p__Planctomycetes;c__Planctomycetia;o__Pirellulales;f__Pirellulaceae;g__Pirellula;s__Pirellula staleyi
ASV10524	0	0	0	4	0	0	0	0	0	0	0	0	0	185.37	0	0	0	0	0	0	37.074	0.001	-15.1781	0.0625063	0.332325	d__Bacteria;p__Planctomycetes;c__Planctomycetia;o__Planctomycetales;f__Planctomycetaceae;g__Gimesia;s__Gimesia sp007748015
ASV10525	0	0	0	0	0	0	4	0	0	0	0	0	0	0	0	0	169.03	0	0	0	0.001	33.806	15.045	0.125007	0.349364	d__Bacteria;p__Acidobacteria;c__Acidobacteriia;o__Acidobacteriales;f__Acidobacteriaceae;g__Occallatibacter;s__uncultured bacterium
ASV10526	4	0	0	0	0	0	0	0	0	0	177.19	0	0	0	0	0	0	0	0	0	35.438	0.001	-15.113	0.125007	0.349364	d__Bacteria;p__Acidobacteria;c__Acidobacteriia;o__Acidobacteriales;f__Acidobacteriaceae;g__Terriglobus
ASV10527	0	0	0	0	0	4	0	0	0	0	0	0	0	0	0	221.9	0	0	0	0	0.001	44.38	15.4376	0.0625063	0.332325	d__Bacteria;p__Proteobacteria;c__Deltaproteobacteria;o__Myxococcales;f__Anaeromyxobacteraceae;g__Anaeromyxobacter;s__Anaeromyxobacter dehalogenans
ASV10528	0	0	0	0	0	0	0	0	4	0	0	0	0	0	0	0	0	0	185.43	0	0.001	37.086	15.1786	0.0625063	0.332325	d__Bacteria;p__Verrucomicrobia;c__Spartobacteria;o__Chthoniobacterales;f__Chthoniobacteraceae;g__Chthoniobacter;s__Chthoniobacter flavus
ASV10529	0	0	0	0	4	0	0	0	0	0	0	0	0	0	190.97	0	0	0	0	0	38.194	0.001	-15.2211	0.00781469	0.0892477	d__Bacteria;p__Acidobacteria;c__Acidobacteriia;o__Acidobacteriales;f__Acidobacteriaceae;g__Occallatibacter;s__uncultured Acidobacteria bacterium
ASV1053	0	0	0	0	0	0	17	0	0	0	0	0	0	0	0	0	718.39	0	0	0	0.001	143.678	17.1325	7.64107e-06	0.000371087	d__Bacteria;p__Proteobacteria;c__Alphaproteobacteria;o__Hyphomicrobiales;f__Hyphomicrobiaceae;g__Rhodoplanes;s__uncultured bacterium
ASV10530	0	0	0	0	0	0	0	0	0	4	0	0	0	0	0	0	0	0	0	178.95	0.001	35.79	15.1273	0.250007	0.441558	d__Bacteria;p__Proteobacteria;c__Betaproteobacteria;o__Burkholderiales;f__Burkholderiaceae;g__Paraburkholderia;s__Paraburkholderia sp001922345
ASV10531	0	4	0	0	0	0	0	0	0	0	0	180.35	0	0	0	0	0	0	0	0	36.07	0.001	-15.1385	0.125007	0.349364	d__Bacteria;p__Proteobacteria;c__Betaproteobacteria;o__Burkholderiales;f__norank;g__Ideonella;s__uncultured bacterium
ASV10532	4	0	0	0	0	0	0	0	0	0	177.19	0	0	0	0	0	0	0	0	0	35.438	0.001	-15.113	0.125007	0.349364	d__Bacteria;p__Proteobacteria;c__Alphaproteobacteria;o__Hyphomicrobiales;f__Phyllobacteriaceae;g__Pseudaminobacter
ASV10533	0	0	0	0	4	0	0	0	0	0	0	0	0	0	190.97	0	0	0	0	0	38.194	0.001	-15.2211	0.00781469	0.0892477	d__Bacteria;p__Proteobacteria;c__Betaproteobacteria;o__Burkholderiales;f__Oxalobacteraceae;g__Noviherbaspirillum;s__Noviherbaspirillum sp003591035
ASV10534	4	0	0	0	0	0	0	0	0	0	177.19	0	0	0	0	0	0	0	0	0	35.438	0.001	-15.113	0.125007	0.349364	d__Bacteria;p__Bacteroidetes;c__Chitinophagia;o__Chitinophagales;f__Chitinophagaceae;g__Puia;s__Puia sp013286315
ASV10535	0	0	0	0	4	0	0	0	0	0	0	0	0	0	190.97	0	0	0	0	0	38.194	0.001	-15.2211	0.00781469	0.0892477	d__Bacteria;p__Bacteroidetes;c__Chitinophagia;o__Chitinophagales;f__Chitinophagaceae;g__Pseudoflavitalea;s__Pseudoflavitalea sp. 5GH32-13
ASV10536	0	0	0	0	0	0	0	0	4	0	0	0	0	0	0	0	0	0	185.43	0	0.001	37.086	15.1786	0.0625063	0.332325	d__Bacteria;p__Bacteroidetes;c__Chitinophagia;o__Chitinophagales;f__Chitinophagaceae;g__Flavisolibacter;s__Flavisolibacter sp013327885
ASV10537	0	0	0	0	0	0	0	0	0	4	0	0	0	0	0	0	0	0	0	178.95	0.001	35.79	15.1273	0.250007	0.441558	d__Bacteria;p__Acidobacteria;c__Vicinamibacteria;o__norank;f__Vicinamibacteraceae;g__Luteitalea;s__uncultured bacterium
ASV10538	0	0	0	0	4	0	0	0	0	0	0	0	0	0	190.97	0	0	0	0	0	38.194	0.001	-15.2211	0.00781469	0.0892477	d__Bacteria;p__Proteobacteria;c__Alphaproteobacteria;o__Rhodospirillales;f__Rhodospirillaceae;g__Hypericibacter;s__Hypericibacter adhaerens
ASV10539	0	0	0	0	0	0	4	0	0	0	0	0	0	0	0	0	169.03	0	0	0	0.001	33.806	15.045	0.125007	0.349364	d__Bacteria;p__Verrucomicrobia;c__Spartobacteria;o__Chthoniobacterales;f__Chthoniobacteraceae;g__Chthoniobacter;s__Chthoniobacter flavus
ASV1054	0	0	0	0	0	0	0	0	0	17	0	0	0	0	0	0	0	0	0	760.52	0.001	152.104	17.2147	0.000244331	0.00670089	d__Bacteria;p__Proteobacteria;c__Alphaproteobacteria;o__Hyphomicrobiales;f__Bradyrhizobiaceae;g__Bradyrhizobium;s__Bradyrhizobium vignae
ASV10540	0	0	0	0	0	0	4	0	0	0	0	0	0	0	0	0	169.03	0	0	0	0.001	33.806	15.045	0.125007	0.349364	d__Bacteria;p__Actinobacteria;c__Actinomycetia;o__Streptosporangiales;f__Thermomonosporaceae;g__Actinoallomurus;s__Actinoallomurus bryophytorum
ASV10541	0	0	0	0	0	0	4	0	0	0	0	0	0	0	0	0	169.03	0	0	0	0.001	33.806	15.045	0.125007	0.349364	d__Bacteria;p__Actinobacteria;c__Rubrobacteria;o__Gaiellales;f__Gaiellaceae;g__Gaiella;s__Gaiella occulta
ASV10542	4	0	0	0	0	0	0	0	0	0	177.19	0	0	0	0	0	0	0	0	0	35.438	0.001	-15.113	0.125007	0.349364	d__Bacteria;p__Proteobacteria;c__Gammaproteobacteria;o__Xanthomonadales;f__Rhodanobacteraceae;g__Oleiagrimonas;s__Oleiagrimonas citrea
ASV10543	4	0	0	0	0	0	0	0	0	0	177.19	0	0	0	0	0	0	0	0	0	35.438	0.001	-15.113	0.125007	0.349364	d__Bacteria;p__Acidobacteria;c__Acidobacteriia;o__Acidobacteriales;f__Acidobacteriaceae;g__Terracidiphilus;s__Terracidiphilus sp903849645
ASV10544	0	0	0	0	0	0	4	0	0	0	0	0	0	0	0	0	169.03	0	0	0	0.001	33.806	15.045	0.125007	0.349364	d__Bacteria;p__Verrucomicrobia;c__Verrucomicrobiae;o__Verrucomicrobiales;f__Verrucomicrobia subdivision 3;g__Pedosphaera;s__uncultured bacterium
ASV10545	0	0	0	0	0	0	4	0	0	0	0	0	0	0	0	0	169.03	0	0	0	0.001	33.806	15.045	0.125007	0.349364	Unclassified
ASV10546	0	0	4	0	0	0	0	0	0	0	0	0	168.72	0	0	0	0	0	0	0	33.744	0.001	-15.0423	0.250007	0.441558	d__Bacteria;p__Planctomycetes;c__Planctomycetia;o__Pirellulales;f__Pirellulaceae;g__Rhodopirellula;s__uncultured bacterium
ASV10547	0	4	0	0	0	0	0	0	0	0	0	180.35	0	0	0	0	0	0	0	0	36.07	0.001	-15.1385	0.125007	0.349364	d__Bacteria;p__Acidobacteria;c__Acidobacteriia;o__Acidobacteriales;f__Acidobacteriaceae;g__Occallatibacter;s__uncultured bacterium
ASV10548	0	4	0	0	0	0	0	0	0	0	0	180.35	0	0	0	0	0	0	0	0	36.07	0.001	-15.1385	0.125007	0.349364	d__Bacteria;p__Proteobacteria;c__Alphaproteobacteria;o__Rhodospirillales;f__Rhodospirillaceae;g__Hypericibacter;s__Hypericibacter adhaerens
ASV10549	0	0	0	0	0	0	0	0	4	0	0	0	0	0	0	0	0	0	185.43	0	0.001	37.086	15.1786	0.0625063	0.332325	d__Bacteria;p__Bacteroidetes;c__Chitinophagia;o__Chitinophagales;f__Chitinophagaceae;g__Ferruginibacter;s__uncultured bacterium
ASV1055	0	0	17	0	0	0	0	0	0	0	0	0	717.06	0	0	0	0	0	0	0	143.412	0.001	-17.1298	0.0009771	0.0195951	d__Bacteria;p__Proteobacteria;c__Alphaproteobacteria;o__Hyphomicrobiales;f__Hyphomicrobiaceae;g__Hyphomicrobium;s__Hyphomicrobium facile
ASV10550	0	0	0	0	0	0	0	0	0	4	0	0	0	0	0	0	0	0	0	178.95	0.001	35.79	15.1273	0.250007	0.441558	d__Bacteria;p__Proteobacteria;c__Alphaproteobacteria;o__Hyphomicrobiales;f__Hyphomicrobiaceae;g__Hyphomicrobium;s__Hyphomicrobium facile
ASV10551	0	4	0	0	0	0	0	0	0	0	0	180.35	0	0	0	0	0	0	0	0	36.07	0.001	-15.1385	0.125007	0.349364	d__Bacteria;p__Verrucomicrobia;c__Spartobacteria;o__Chthoniobacterales;f__Chthoniobacteraceae;g__Chthoniobacter;s__Chthoniobacter flavus
ASV10552	4	0	0	0	0	0	0	0	0	0	177.19	0	0	0	0	0	0	0	0	0	35.438	0.001	-15.113	0.125007	0.349364	d__Bacteria;p__Actinobacteria;c__Actinomycetia;o__Propionibacteriales;f__Nocardioidaceae;g__Nocardioides;s__Nocardioides sp008761635
ASV10553	4	0	0	0	0	0	0	0	0	0	177.19	0	0	0	0	0	0	0	0	0	35.438	0.001	-15.113	0.125007	0.349364	d__Bacteria;p__Proteobacteria;c__Alphaproteobacteria;o__Micropepsales;f__Micropepsaceae;g__Rhizomicrobium;s__Rhizomicrobium sp013149165
ASV10554	0	0	0	0	0	0	4	0	0	0	0	0	0	0	0	0	169.03	0	0	0	0.001	33.806	15.045	0.125007	0.349364	d__Bacteria;p__Planctomycetes;c__Planctomycetia;o__Gemmatales;f__Gemmataceae;g__Fimbriiglobus;s__Fimbriiglobus ruber
ASV10555	0	0	0	0	0	0	0	0	4	0	0	0	0	0	0	0	0	0	185.43	0	0.001	37.086	15.1786	0.0625063	0.332325	d__Bacteria;p__Proteobacteria;c__Betaproteobacteria;o__Burkholderiales;f__Comamonadaceae;g__Variovorax;s__Variovorax sp900090195
ASV10556	4	0	0	0	0	0	0	0	0	0	177.19	0	0	0	0	0	0	0	0	0	35.438	0.001	-15.113	0.125007	0.349364	d__Bacteria;p__Proteobacteria;c__Betaproteobacteria;o__Burkholderiales;f__Comamonadaceae;g__Ottowia;s__uncultured bacterium
ASV10557	4	0	0	0	0	0	0	0	0	0	177.19	0	0	0	0	0	0	0	0	0	35.438	0.001	-15.113	0.125007	0.349364	d__Bacteria;p__Proteobacteria;c__Alphaproteobacteria;o__Hyphomicrobiales;f__Bradyrhizobiaceae;g__Bradyrhizobium;s__Bradyrhizobium canariense
ASV10558	0	0	0	4	0	0	0	0	0	0	0	0	0	185.37	0	0	0	0	0	0	37.074	0.001	-15.1781	0.0625063	0.332325	d__Bacteria;p__Bacteroidetes;c__Sphingobacteriia;o__Sphingobacteriales;f__Sphingobacteriaceae;g__Mucilaginibacter;s__Mucilaginibacter xinganensis
ASV10559	0	0	0	0	4	0	0	0	0	0	0	0	0	0	190.97	0	0	0	0	0	38.194	0.001	-15.2211	0.00781469	0.0892477	Unclassified
ASV1056	0	0	0	0	0	0	0	0	0	17	0	0	0	0	0	0	0	0	0	760.52	0.001	152.104	17.2147	0.000244331	0.00670089	d__Bacteria;p__Gemmatimonadetes;c__Gemmatimonadetes;o__Gemmatimonadales;f__Gemmatimonadaceae;g__Gemmatimonas;s__Gemmatimonas sp013004105
ASV10560	0	0	0	0	4	0	0	0	0	0	0	0	0	0	190.97	0	0	0	0	0	38.194	0.001	-15.2211	0.00781469	0.0892477	d__Bacteria;p__Proteobacteria;c__Alphaproteobacteria;o__Rhodospirillales;f__Stellaceae;g__Stella;s__Stella vacuolata
ASV10561	4	0	0	0	0	0	0	0	0	0	177.19	0	0	0	0	0	0	0	0	0	35.438	0.001	-15.113	0.125007	0.349364	Unclassified
ASV10562	0	0	0	0	4	0	0	0	0	0	0	0	0	0	190.97	0	0	0	0	0	38.194	0.001	-15.2211	0.00781469	0.0892477	d__Bacteria;p__Proteobacteria;c__Deltaproteobacteria;o__Syntrophobacterales;f__Syntrophaceae;g__Desulfomonile;s__uncultured bacterium
ASV10563	0	0	0	0	0	0	0	0	0	4	0	0	0	0	0	0	0	0	0	178.95	0.001	35.79	15.1273	0.250007	0.441558	d__Bacteria;p__Acidobacteria;c__Acidobacteriia;o__Acidobacteriales;f__Acidobacteriaceae;g__Candidatus Koribacter;s__uncultured Acidobacteria bacterium
ASV10564	0	0	0	0	4	0	0	0	0	0	0	0	0	0	190.97	0	0	0	0	0	38.194	0.001	-15.2211	0.00781469	0.0892477	d__Bacteria;p__Bacteroidetes;c__Sphingobacteriia;o__Sphingobacteriales;f__Sphingobacteriaceae;g__Mucilaginibacter;s__Mucilaginibacter sp900142915
ASV10565	0	0	0	0	0	0	0	0	4	0	0	0	0	0	0	0	0	0	185.43	0	0.001	37.086	15.1786	0.0625063	0.332325	d__Bacteria;p__Firmicutes;c__Negativicutes;o__Selenomonadales;f__Sporomusaceae;g__Thermosinus;s__Thermosinus carboxydivorans
ASV10566	0	0	0	0	0	0	0	0	4	0	0	0	0	0	0	0	0	0	185.43	0	0.001	37.086	15.1786	0.0625063	0.332325	d__Bacteria;p__Acidobacteria;c__Blastocatellia;o__Blastocatellales;f__Pyrinomonadaceae;g__Pyrinomonas
ASV10567	0	0	0	0	4	0	0	0	0	0	0	0	0	0	190.97	0	0	0	0	0	38.194	0.001	-15.2211	0.00781469	0.0892477	d__Bacteria;p__Proteobacteria;c__Gammaproteobacteria;o__Xanthomonadales;f__Rhodanobacteraceae;g__Dokdonella;s__Dokdonella koreensis
ASV10568	4	0	0	0	0	0	0	0	0	0	177.19	0	0	0	0	0	0	0	0	0	35.438	0.001	-15.113	0.125007	0.349364	d__Bacteria;p__Bacteroidetes;c__Cytophagia;o__Cytophagales;f__Fulvivirgaceae;g__Chryseolinea;s__Chryseolinea soli
ASV10569	0	4	0	0	0	0	0	0	0	0	0	180.35	0	0	0	0	0	0	0	0	36.07	0.001	-15.1385	0.125007	0.349364	d__Bacteria;p__Proteobacteria;c__Alphaproteobacteria;o__Hyphomicrobiales;f__Reyranellaceae;g__Reyranella;s__uncultured bacterium
ASV1057	0	0	0	0	0	17	0	0	0	0	0	0	0	0	0	943.08	0	0	0	0	0.001	188.616	17.5251	1.91098e-06	0.000112236	d__Bacteria;p__Proteobacteria;c__Betaproteobacteria;o__Burkholderiales;f__Oxalobacteraceae;g__Noviherbaspirillum;s__Noviherbaspirillum sp003590875
ASV10570	0	0	0	0	0	0	4	0	0	0	0	0	0	0	0	0	169.03	0	0	0	0.001	33.806	15.045	0.125007	0.349364	d__Bacteria;p__Proteobacteria;c__Alphaproteobacteria;o__Hyphomicrobiales;f__Bradyrhizobiaceae;g__Bradyrhizobium;s__Bradyrhizobium sp000015165
ASV10571	0	0	0	0	0	0	4	0	0	0	0	0	0	0	0	0	169.03	0	0	0	0.001	33.806	15.045	0.125007	0.349364	d__Bacteria;p__Planctomycetes;c__Planctomycetia;o__Gemmatales;f__Gemmataceae;g__Fimbriiglobus;s__Fimbriiglobus ruber
ASV10572	0	0	4	0	0	0	0	0	0	0	0	0	168.72	0	0	0	0	0	0	0	33.744	0.001	-15.0423	0.250007	0.441558	d__Bacteria;p__Actinobacteria;c__Actinomycetia;o__Streptosporangiales;f__Thermomonosporaceae;g__Spirillospora;s__Spirillospora sp006547145
ASV10573	0	0	0	0	0	0	0	0	4	0	0	0	0	0	0	0	0	0	185.43	0	0.001	37.086	15.1786	0.0625063	0.332325	d__Bacteria;p__Planctomycetes;c__Planctomycetia;o__Pirellulales;f__Pirellulaceae;g__Pirellula;s__uncultured bacterium
ASV10574	0	0	0	0	0	0	0	0	4	0	0	0	0	0	0	0	0	0	185.43	0	0.001	37.086	15.1786	0.0625063	0.332325	d__Bacteria;p__Proteobacteria;c__Alphaproteobacteria;o__Hyphomicrobiales;f__Xanthobacteraceae;g__Pseudolabrys;s__Pseudolabrys sp009694265
ASV10575	0	0	0	0	0	0	0	0	4	0	0	0	0	0	0	0	0	0	185.43	0	0.001	37.086	15.1786	0.0625063	0.332325	d__Bacteria;p__Proteobacteria;c__Alphaproteobacteria;o__Hyphomicrobiales;f__Methylobacteriaceae;g__Methylobacterium;s__Methylobacterium sp000376345
ASV10576	0	0	0	4	0	0	0	0	0	0	0	0	0	185.37	0	0	0	0	0	0	37.074	0.001	-15.1781	0.0625063	0.332325	d__Bacteria;p__Acidobacteria;c__Acidobacteriia;o__Acidobacteriales;f__Acidobacteriaceae;g__Terracidiphilus;s__Terracidiphilus sp903849645
ASV10577	0	0	0	4	0	0	0	0	0	0	0	0	0	185.37	0	0	0	0	0	0	37.074	0.001	-15.1781	0.0625063	0.332325	d__Bacteria;p__Planctomycetes;c__Planctomycetia;o__Isosphaerales;f__Isosphaeraceae;g__Singulisphaera;s__Singulisphaera sp900129635
ASV10578	4	0	0	0	0	0	0	0	0	0	177.19	0	0	0	0	0	0	0	0	0	35.438	0.001	-15.113	0.125007	0.349364	d__Bacteria;p__Proteobacteria;c__Alphaproteobacteria;o__Hyphomicrobiales;f__Reyranellaceae;g__Reyranella;s__uncultured bacterium
ASV10579	0	0	0	0	0	0	0	0	0	4	0	0	0	0	0	0	0	0	0	178.95	0.001	35.79	15.1273	0.250007	0.441558	d__Bacteria;p__Bacteroidetes;c__Sphingobacteriia;o__Sphingobacteriales;f__Sphingobacteriaceae;g__Mucilaginibacter;s__Mucilaginibacter paludis
ASV1058	0	0	0	0	0	17	0	0	0	0	0	0	0	0	0	943.08	0	0	0	0	0.001	188.616	17.5251	1.91098e-06	0.000112236	Unclassified
ASV10580	0	4	0	0	0	0	0	0	0	0	0	180.35	0	0	0	0	0	0	0	0	36.07	0.001	-15.1385	0.125007	0.349364	d__Bacteria;p__Proteobacteria;c__Betaproteobacteria;o__Burkholderiales;f__Oxalobacteraceae;g__Massilia;s__Massilia sp001485665
ASV10581	0	0	0	0	4	0	0	0	0	0	0	0	0	0	190.97	0	0	0	0	0	38.194	0.001	-15.2211	0.00781469	0.0892477	d__Bacteria;p__Candidatus Melainabacteria;c__norank;o__Candidatus Obscuribacterales;f__norank;g__Candidatus Obscuribacter;s__Obscuribacter phosphatis
ASV10582	0	4	0	0	0	0	0	0	0	0	0	180.35	0	0	0	0	0	0	0	0	36.07	0.001	-15.1385	0.125007	0.349364	d__Bacteria;p__Proteobacteria;c__Betaproteobacteria;o__Burkholderiales;f__Oxalobacteraceae;g__Duganella;s__Duganella sp003217375
ASV10583	0	0	0	4	0	0	0	0	0	0	0	0	0	185.37	0	0	0	0	0	0	37.074	0.001	-15.1781	0.0625063	0.332325	d__Bacteria;p__Gemmatimonadetes;c__Gemmatimonadetes;o__Gemmatimonadales;f__Gemmatimonadaceae;g__Gemmatirosa;s__Gemmatirosa kalamazoonesis
ASV10584	0	0	0	0	0	0	4	0	0	0	0	0	0	0	0	0	169.03	0	0	0	0.001	33.806	15.045	0.125007	0.349364	d__Bacteria;p__Proteobacteria;c__Alphaproteobacteria;o__Rhodospirillales;f__Stellaceae;g__Stella;s__Stella vacuolata
ASV10585	0	0	0	0	0	0	0	0	4	0	0	0	0	0	0	0	0	0	185.43	0	0.001	37.086	15.1786	0.0625063	0.332325	d__Bacteria;p__Proteobacteria;c__Alphaproteobacteria;o__Hyphomicrobiales;f__Hyphomicrobiaceae;g__Rhodoplanes;s__uncultured bacterium
ASV10586	0	0	0	0	0	0	4	0	0	0	0	0	0	0	0	0	169.03	0	0	0	0.001	33.806	15.045	0.125007	0.349364	d__Bacteria;p__Proteobacteria;c__Alphaproteobacteria;o__Sphingomonadales;f__Sphingomonadaceae;g__Allosphingosinicella;s__Allosphingosinicella sp013816585
ASV10587	0	0	0	0	4	0	0	0	0	0	0	0	0	0	190.97	0	0	0	0	0	38.194	0.001	-15.2211	0.00781469	0.0892477	d__Bacteria;p__Proteobacteria;c__Betaproteobacteria;o__Burkholderiales;f__Oxalobacteraceae;g__Undibacterium;s__Undibacterium sp009937955
ASV10588	0	0	0	0	0	0	4	0	0	0	0	0	0	0	0	0	169.03	0	0	0	0.001	33.806	15.045	0.125007	0.349364	d__Bacteria;p__Proteobacteria;c__Betaproteobacteria;o__Burkholderiales;f__norank;g__Rhizobacter;s__Rhizobacter sp900142965
ASV10589	0	0	0	0	0	0	0	0	4	0	0	0	0	0	0	0	0	0	185.43	0	0.001	37.086	15.1786	0.0625063	0.332325	d__Bacteria;p__Planctomycetes;c__Planctomycetia;o__Gemmatales;f__Gemmataceae;g__Fimbriiglobus;s__Fimbriiglobus ruber
ASV1059	0	17	0	0	0	0	0	0	0	0	0	766.49	0	0	0	0	0	0	0	0	153.298	0.001	-17.226	7.64107e-06	0.000371087	d__Bacteria;p__Acidobacteria;c__Acidobacteriia;o__Acidobacteriales;f__Acidobacteriaceae;g__Occallatibacter;s__uncultured bacterium
ASV10590	0	0	0	0	0	0	0	0	0	4	0	0	0	0	0	0	0	0	0	178.95	0.001	35.79	15.1273	0.250007	0.441558	d__Bacteria;p__Proteobacteria;c__Deltaproteobacteria;o__Myxococcales;f__Labilitrichaceae;g__Labilithrix;s__Labilithrix luteola
ASV10591	0	4	0	0	0	0	0	0	0	0	0	180.35	0	0	0	0	0	0	0	0	36.07	0.001	-15.1385	0.125007	0.349364	d__Bacteria;p__Proteobacteria;c__Alphaproteobacteria;o__Rhodospirillales;f__Acetobacteraceae;g__Acidisphaera
ASV10592	4	0	0	0	0	0	0	0	0	0	177.19	0	0	0	0	0	0	0	0	0	35.438	0.001	-15.113	0.125007	0.349364	d__Bacteria;p__Proteobacteria;c__Alphaproteobacteria;o__Micropepsales;f__Micropepsaceae;g__Rhizomicrobium;s__Rhizomicrobium sp013149165
ASV10593	4	0	0	0	0	0	0	0	0	0	177.19	0	0	0	0	0	0	0	0	0	35.438	0.001	-15.113	0.125007	0.349364	d__Bacteria;p__Proteobacteria;c__Betaproteobacteria;o__Burkholderiales;f__Oxalobacteraceae;g__Lacisediminimonas;s__Lacisediminimonas profundi
ASV10594	0	0	0	0	0	4	0	0	0	0	0	0	0	0	0	221.9	0	0	0	0	0.001	44.38	15.4376	0.0625063	0.332325	d__Bacteria;p__Proteobacteria;c__Alphaproteobacteria;o__Rhodospirillales;f__Acetobacteraceae;g__Endobacter;s__Endobacter medicaginis
ASV10595	0	0	4	0	0	0	0	0	0	0	0	0	168.72	0	0	0	0	0	0	0	33.744	0.001	-15.0423	0.250007	0.441558	d__Bacteria;p__Chloroflexi;c__Ktedonobacteria;o__Ktedonobacterales;f__Dictyobacteraceae;g__Tengunoibacter;s__Tengunoibacter tsumagoiensis
ASV10596	0	0	0	0	4	0	0	0	0	0	0	0	0	0	190.97	0	0	0	0	0	38.194	0.001	-15.2211	0.00781469	0.0892477	d__Bacteria;p__Planctomycetes;c__Planctomycetia;o__Gemmatales;f__Gemmataceae;g__Fimbriiglobus;s__Fimbriiglobus ruber
ASV10597	4	0	0	0	0	0	0	0	0	0	177.19	0	0	0	0	0	0	0	0	0	35.438	0.001	-15.113	0.125007	0.349364	d__Bacteria;p__Proteobacteria;c__Alphaproteobacteria;o__Rhodospirillales;f__Rhodospirillaceae;g__Inquilinus
ASV10598	0	0	0	4	0	0	0	0	0	0	0	0	0	185.37	0	0	0	0	0	0	37.074	0.001	-15.1781	0.0625063	0.332325	d__Bacteria;p__Bacteroidetes;c__Bacteroidia;o__Bacteroidales;f__Dysgonomonadaceae;g__Proteiniphilum;s__Proteiniphilum sp012837345
ASV10599	0	4	0	0	0	0	0	0	0	0	0	180.35	0	0	0	0	0	0	0	0	36.07	0.001	-15.1385	0.125007	0.349364	d__Bacteria;p__Bacteroidetes;c__Chitinophagia;o__Chitinophagales;f__Chitinophagaceae;g__Chitinophaga;s__Chitinophaga sp012726295
ASV106	0	0	0	0	0	73	0	0	0	0	0	0	0	0	0	4049.71	0	0	0	0	0.001	809.942	19.6275	1.07062e-25	7.57218e-23	d__Bacteria;p__Firmicutes;c__Bacilli;o__Bacillales;f__Planococcaceae;g__Paenisporosarcina;s__Paenisporosarcina antarctica
ASV1060	0	0	0	0	0	17	0	0	0	0	0	0	0	0	0	943.08	0	0	0	0	0.001	188.616	17.5251	1.91098e-06	0.000112236	d__Bacteria;p__Proteobacteria;c__Alphaproteobacteria;o__Hyphomicrobiales;f__Bradyrhizobiaceae;g__Bradyrhizobium;s__Bradyrhizobium canariense
ASV10600	0	4	0	0	0	0	0	0	0	0	0	180.35	0	0	0	0	0	0	0	0	36.07	0.001	-15.1385	0.125007	0.349364	d__Bacteria;p__Armatimonadetes;c__Chthonomonadetes;o__Chthonomonadales;f__Chthonomonadaceae;g__Chthonomonas;s__Chthonomonas calidirosea
ASV10601	0	0	0	0	0	0	0	0	4	0	0	0	0	0	0	0	0	0	185.43	0	0.001	37.086	15.1786	0.0625063	0.332325	d__Bacteria;p__Proteobacteria;c__Betaproteobacteria;o__Burkholderiales;f__Comamonadaceae;g__Variovorax;s__Variovorax sp003019815
ASV10602	0	0	0	0	0	0	0	0	0	4	0	0	0	0	0	0	0	0	0	178.95	0.001	35.79	15.1273	0.250007	0.441558	d__Bacteria;p__Acidobacteria;c__Vicinamibacteria;o__norank;f__Vicinamibacteraceae;g__Luteitalea;s__Luteitalea pratensis
ASV10603	0	0	0	0	4	0	0	0	0	0	0	0	0	0	190.97	0	0	0	0	0	38.194	0.001	-15.2211	0.00781469	0.0892477	d__Bacteria;p__Bacteroidetes;c__Sphingobacteriia;o__Sphingobacteriales;f__Sphingobacteriaceae;g__Mucilaginibacter;s__Mucilaginibacter paludis
ASV10604	0	0	4	0	0	0	0	0	0	0	0	0	168.72	0	0	0	0	0	0	0	33.744	0.001	-15.0423	0.250007	0.441558	d__Bacteria;p__Proteobacteria;c__Gammaproteobacteria;o__norank;f__norank;g__Acidibacter;s__uncultured gamma proteobacterium
ASV10605	0	4	0	0	0	0	0	0	0	0	0	180.35	0	0	0	0	0	0	0	0	36.07	0.001	-15.1385	0.125007	0.349364	d__Bacteria;p__Proteobacteria;c__Betaproteobacteria;o__Burkholderiales;f__norank;g__Leptothrix;s__Leptothrix cholodnii
ASV10606	0	0	0	0	4	0	0	0	0	0	0	0	0	0	190.97	0	0	0	0	0	38.194	0.001	-15.2211	0.00781469	0.0892477	d__Bacteria;p__Acidobacteria;c__Blastocatellia;o__Blastocatellales;f__Blastocatellaceae;g__Stenotrophobacter;s__uncultured bacterium
ASV10607	4	0	0	0	0	0	0	0	0	0	177.19	0	0	0	0	0	0	0	0	0	35.438	0.001	-15.113	0.125007	0.349364	d__Bacteria;p__Proteobacteria;c__Deltaproteobacteria;o__Myxococcales;f__Kofleriaceae;g__Haliangium;s__Haliangium ochraceum
ASV10608	0	0	0	0	4	0	0	0	0	0	0	0	0	0	190.97	0	0	0	0	0	38.194	0.001	-15.2211	0.00781469	0.0892477	d__Bacteria;p__Gemmatimonadetes;c__Gemmatimonadetes;o__Gemmatimonadales;f__Gemmatimonadaceae;g__Gemmatirosa;s__Gemmatirosa kalamazoonesis
ASV10609	0	0	0	0	0	0	0	0	0	4	0	0	0	0	0	0	0	0	0	178.95	0.001	35.79	15.1273	0.250007	0.441558	d__Bacteria;p__Verrucomicrobia;c__Spartobacteria;o__Chthoniobacterales;f__Chthoniobacteraceae;g__Chthoniobacter;s__Chthoniobacter flavus
ASV1061	0	0	0	0	0	17	0	0	0	0	0	0	0	0	0	943.08	0	0	0	0	0.001	188.616	17.5251	1.91098e-06	0.000112236	d__Bacteria;p__Actinobacteria;c__Actinomycetia;o__Streptosporangiales;f__Thermomonosporaceae;g__Actinoallomurus;s__Actinoallomurus bryophytorum
ASV10610	4	0	0	0	0	0	0	0	0	0	177.19	0	0	0	0	0	0	0	0	0	35.438	0.001	-15.113	0.125007	0.349364	d__Bacteria;p__Planctomycetes;c__Planctomycetia;o__Planctomycetales;f__Planctomycetaceae;g__Schlesneria;s__Schlesneria sp903904835
ASV10611	0	0	0	0	0	0	0	0	4	0	0	0	0	0	0	0	0	0	185.43	0	0.001	37.086	15.1786	0.0625063	0.332325	d__Bacteria;p__Verrucomicrobia;c__Spartobacteria;o__Chthoniobacterales;f__Chthoniobacteraceae;g__Chthoniobacter;s__Chthoniobacter flavus
ASV10612	0	0	0	0	0	0	4	0	0	0	0	0	0	0	0	0	169.03	0	0	0	0.001	33.806	15.045	0.125007	0.349364	d__Bacteria;p__Verrucomicrobia;c__Spartobacteria;o__Chthoniobacterales;f__Chthoniobacteraceae;g__Chthoniobacter;s__Chthoniobacter flavus
ASV10613	0	0	0	0	0	4	0	0	0	0	0	0	0	0	0	221.9	0	0	0	0	0.001	44.38	15.4376	0.0625063	0.332325	d__Bacteria;p__Bacteroidetes;c__Flavobacteriia;o__Flavobacteriales;f__Flavobacteriaceae;g__Flavobacterium;s__uncultured bacterium
ASV10614	0	0	0	0	0	0	4	0	0	0	0	0	0	0	0	0	169.03	0	0	0	0.001	33.806	15.045	0.125007	0.349364	d__Bacteria;p__Proteobacteria;c__Oligoflexia;o__Bdellovibrionales;f__Bdellovibrionaceae;g__Bdellovibrio;s__uncultured bacterium
ASV10615	0	0	0	0	4	0	0	0	0	0	0	0	0	0	190.97	0	0	0	0	0	38.194	0.001	-15.2211	0.00781469	0.0892477	d__Bacteria;p__Verrucomicrobia;c__Spartobacteria;o__Chthoniobacterales;f__Chthoniobacteraceae;g__Candidatus Udaeobacter;s__Udaeobacter sp003218615
ASV10616	0	4	0	0	0	0	0	0	0	0	0	180.35	0	0	0	0	0	0	0	0	36.07	0.001	-15.1385	0.125007	0.349364	d__Bacteria;p__Actinobacteria;c__Acidimicrobiia;o__Acidimicrobiales;f__Iamiaceae;g__Iamia
ASV10617	0	0	4	0	0	0	0	0	0	0	0	0	168.72	0	0	0	0	0	0	0	33.744	0.001	-15.0423	0.250007	0.441558	d__Bacteria;p__Proteobacteria;c__Deltaproteobacteria;o__Myxococcales;f__Labilitrichaceae;g__Labilithrix;s__Labilithrix luteola
ASV10618	0	0	0	0	0	0	0	0	4	0	0	0	0	0	0	0	0	0	185.43	0	0.001	37.086	15.1786	0.0625063	0.332325	Unclassified
ASV10619	4	0	0	0	0	0	0	0	0	0	177.19	0	0	0	0	0	0	0	0	0	35.438	0.001	-15.113	0.125007	0.349364	d__Bacteria;p__Bacteroidetes;c__Flavobacteriia;o__Flavobacteriales;f__Flavobacteriaceae;g__Flavobacterium;s__Flavobacterium sp900129795
ASV1062	0	0	0	17	0	0	0	0	0	0	0	0	0	787.84	0	0	0	0	0	0	157.568	0.001	-17.2656	7.64107e-06	0.000371087	d__Bacteria;p__Acidobacteria;c__Acidobacteriia;o__Acidobacteriales;f__Acidobacteriaceae;g__Terracidiphilus;s__Terracidiphilus sp903849645
ASV10620	4	0	0	0	0	0	0	0	0	0	177.19	0	0	0	0	0	0	0	0	0	35.438	0.001	-15.113	0.125007	0.349364	d__Bacteria;p__Proteobacteria;c__Alphaproteobacteria;o__Hyphomicrobiales;f__norank;g__Pseudorhodoplanes;s__Pseudorhodoplanes sinuspersici
ASV10621	0	0	0	0	4	0	0	0	0	0	0	0	0	0	190.97	0	0	0	0	0	38.194	0.001	-15.2211	0.00781469	0.0892477	d__Bacteria;p__Cyanobacteria;c__norank;o__Synechococcales;f__Prochlorotrichaceae;g__Nodosilinea;s__Nodosilinea sp003017855
ASV10622	0	0	0	4	0	0	0	0	0	0	0	0	0	185.37	0	0	0	0	0	0	37.074	0.001	-15.1781	0.0625063	0.332325	d__Bacteria;p__Actinobacteria;c__Acidimicrobiia;o__Acidimicrobiales;f__Acidimicrobiaceae;g__Acidithrix;s__Acidithrix ferrooxidans
ASV10623	0	4	0	0	0	0	0	0	0	0	0	180.35	0	0	0	0	0	0	0	0	36.07	0.001	-15.1385	0.125007	0.349364	d__Bacteria;p__Proteobacteria;c__Alphaproteobacteria;o__Hyphomicrobiales;f__Xanthobacteraceae;g__Xanthobacter;s__Xanthobacter sp000702385
ASV10624	4	0	0	0	0	0	0	0	0	0	177.19	0	0	0	0	0	0	0	0	0	35.438	0.001	-15.113	0.125007	0.349364	d__Bacteria;p__Proteobacteria;c__Alphaproteobacteria;o__Hyphomicrobiales;f__Devosiaceae;g__Devosia;s__Devosia chinhatensis
ASV10625	4	0	0	0	0	0	0	0	0	0	177.19	0	0	0	0	0	0	0	0	0	35.438	0.001	-15.113	0.125007	0.349364	d__Bacteria;p__Chloroflexi;c__Ktedonobacteria;o__Ktedonobacterales;f__Ktedonobacteraceae;g__Ktedonobacter;s__Ktedonobacter racemifer
ASV10626	0	0	4	0	0	0	0	0	0	0	0	0	168.72	0	0	0	0	0	0	0	33.744	0.001	-15.0423	0.250007	0.441558	d__Bacteria;p__Acidobacteria;c__Acidobacteriia;o__Acidobacteriales;f__Acidobacteriaceae;g__Candidatus Koribacter;s__uncultured Acidobacteria bacterium
ASV10627	0	0	0	0	4	0	0	0	0	0	0	0	0	0	190.97	0	0	0	0	0	38.194	0.001	-15.2211	0.00781469	0.0892477	d__Bacteria;p__Candidatus Saccharibacteria;c__norank;o__norank;f__norank;g__Candidatus Saccharimonas;s__Saccharimonas aalborgensis
ASV10628	4	0	0	0	0	0	0	0	0	0	177.19	0	0	0	0	0	0	0	0	0	35.438	0.001	-15.113	0.125007	0.349364	Unclassified
ASV10629	0	0	0	0	0	0	4	0	0	0	0	0	0	0	0	0	169.03	0	0	0	0.001	33.806	15.045	0.125007	0.349364	d__Bacteria;p__Firmicutes;c__Negativicutes;o__Selenomonadales;f__Sporomusaceae;g__Thermosinus;s__Thermosinus carboxydivorans
ASV1063	0	0	0	17	0	0	0	0	0	0	0	0	0	787.84	0	0	0	0	0	0	157.568	0.001	-17.2656	7.64107e-06	0.000371087	d__Bacteria;p__Acidobacteria;c__Vicinamibacteria;o__norank;f__Vicinamibacteraceae;g__Luteitalea;s__Luteitalea pratensis
ASV10630	0	0	0	0	0	0	4	0	0	0	0	0	0	0	0	0	169.03	0	0	0	0.001	33.806	15.045	0.125007	0.349364	d__Bacteria;p__Proteobacteria;c__Alphaproteobacteria;o__Hyphomicrobiales;f__norank;g__Pseudorhodoplanes;s__Pseudorhodoplanes sinuspersici
ASV10631	0	0	0	0	4	0	0	0	0	0	0	0	0	0	190.97	0	0	0	0	0	38.194	0.001	-15.2211	0.00781469	0.0892477	d__Bacteria;p__Proteobacteria;c__Alphaproteobacteria;o__Hyphomicrobiales;f__Xanthobacteraceae;g__Pseudolabrys;s__uncultured bacterium
ASV10632	0	4	0	0	0	0	0	0	0	0	0	180.35	0	0	0	0	0	0	0	0	36.07	0.001	-15.1385	0.125007	0.349364	d__Bacteria;p__Bacteroidetes;c__Sphingobacteriia;o__Sphingobacteriales;f__Sphingobacteriaceae;g__Mucilaginibacter;s__Mucilaginibacter gossypii
ASV10633	0	0	0	0	0	0	0	0	0	4	0	0	0	0	0	0	0	0	0	178.95	0.001	35.79	15.1273	0.250007	0.441558	d__Bacteria;p__Proteobacteria;c__Deltaproteobacteria;o__Desulfuromonadales;f__Geobacteraceae;g__Geobacter;s__Geobacter pickeringii
ASV10634	0	0	0	0	0	0	4	0	0	0	0	0	0	0	0	0	169.03	0	0	0	0.001	33.806	15.045	0.125007	0.349364	d__Bacteria;p__Planctomycetes;c__Planctomycetia;o__Isosphaerales;f__Isosphaeraceae;g__Paludisphaera;s__Paludisphaera borealis
ASV10635	0	4	0	0	0	0	0	0	0	0	0	180.35	0	0	0	0	0	0	0	0	36.07	0.001	-15.1385	0.125007	0.349364	d__Bacteria;p__Planctomycetes;c__Planctomycetia;o__Pirellulales;f__Pirellulaceae;g__Rhodopirellula;s__uncultured bacterium
ASV10636	0	0	0	0	0	0	0	0	4	0	0	0	0	0	0	0	0	0	185.43	0	0.001	37.086	15.1786	0.0625063	0.332325	d__Bacteria;p__Proteobacteria;c__Betaproteobacteria;o__Burkholderiales;f__Oxalobacteraceae;g__Massilia;s__uncultured bacterium
ASV10637	4	0	0	0	0	0	0	0	0	0	177.19	0	0	0	0	0	0	0	0	0	35.438	0.001	-15.113	0.125007	0.349364	d__Bacteria;p__Proteobacteria;c__Betaproteobacteria;o__Burkholderiales;f__Oxalobacteraceae;g__Janthinobacterium;s__Janthinobacterium sp001865675
ASV10638	4	0	0	0	0	0	0	0	0	0	177.19	0	0	0	0	0	0	0	0	0	35.438	0.001	-15.113	0.125007	0.349364	d__Bacteria;p__Planctomycetes;c__Planctomycetia;o__Pirellulales;f__Pirellulaceae;g__Rhodopirellula
ASV10639	0	0	0	0	0	0	4	0	0	0	0	0	0	0	0	0	169.03	0	0	0	0.001	33.806	15.045	0.125007	0.349364	d__Bacteria;p__Actinobacteria;c__Acidimicrobiia;o__Acidimicrobiales;f__Acidimicrobiaceae;g__Acidimicrobium;s__Acidimicrobium ferrooxidans
ASV1064	0	0	0	0	0	17	0	0	0	0	0	0	0	0	0	943.08	0	0	0	0	0.001	188.616	17.5251	1.91098e-06	0.000112236	d__Bacteria;p__Proteobacteria;c__Alphaproteobacteria;o__Hyphomicrobiales;f__Bradyrhizobiaceae;g__Bradyrhizobium;s__Bradyrhizobium elkanii_A
ASV10640	0	0	0	0	0	4	0	0	0	0	0	0	0	0	0	221.9	0	0	0	0	0.001	44.38	15.4376	0.0625063	0.332325	Unclassified
ASV10641	0	0	0	0	0	4	0	0	0	0	0	0	0	0	0	221.9	0	0	0	0	0.001	44.38	15.4376	0.0625063	0.332325	d__Bacteria;p__Acidobacteria;c__Acidobacteriia;o__Bryobacterales;f__Bryobacteraceae;g__Bryobacter;s__Bryobacter aggregatus
ASV10642	0	0	0	0	0	0	4	0	0	0	0	0	0	0	0	0	169.03	0	0	0	0.001	33.806	15.045	0.125007	0.349364	d__Bacteria;p__Planctomycetes;c__Phycisphaerae;o__Sedimentisphaerales;f__Anaerohalosphaeraceae;g__Anaerohalosphaera;s__Anaerohalosphaera lusitana
ASV10643	0	4	0	0	0	0	0	0	0	0	0	180.35	0	0	0	0	0	0	0	0	36.07	0.001	-15.1385	0.125007	0.349364	d__Bacteria;p__Actinobacteria;c__Actinomycetia;o__Corynebacteriales;f__Mycobacteriaceae;g__Mycobacterium;s__Mycobacterium arupense
ASV10644	0	0	0	0	0	0	4	0	0	0	0	0	0	0	0	0	169.03	0	0	0	0.001	33.806	15.045	0.125007	0.349364	d__Bacteria;p__Planctomycetes;c__Planctomycetia;o__Isosphaerales;f__Isosphaeraceae;g__Singulisphaera;s__Singulisphaera sp900129635
ASV10645	0	0	0	0	0	4	0	0	0	0	0	0	0	0	0	221.9	0	0	0	0	0.001	44.38	15.4376	0.0625063	0.332325	d__Bacteria;p__Planctomycetes;c__Planctomycetia;o__Gemmatales;f__Gemmataceae;g__Gemmata;s__Gemmata obscuriglobus
ASV10646	0	0	0	0	0	0	4	0	0	0	0	0	0	0	0	0	169.03	0	0	0	0.001	33.806	15.045	0.125007	0.349364	d__Bacteria;p__Proteobacteria;c__Betaproteobacteria;o__Rhodocyclales;f__Zoogloeaceae;g__Zoogloea;s__uncultured bacterium
ASV10647	0	0	4	0	0	0	0	0	0	0	0	0	168.72	0	0	0	0	0	0	0	33.744	0.001	-15.0423	0.250007	0.441558	d__Bacteria;p__Planctomycetes;c__Planctomycetia;o__Gemmatales;f__Gemmataceae;g__Fimbriiglobus;s__Fimbriiglobus ruber
ASV10648	4	0	0	0	0	0	0	0	0	0	177.19	0	0	0	0	0	0	0	0	0	35.438	0.001	-15.113	0.125007	0.349364	Unclassified
ASV10649	0	0	0	4	0	0	0	0	0	0	0	0	0	185.37	0	0	0	0	0	0	37.074	0.001	-15.1781	0.0625063	0.332325	d__Bacteria;p__Proteobacteria;c__Gammaproteobacteria;o__Legionellales;f__Legionellaceae;g__Tatlockia;s__Tatlockia clemsonensis
ASV1065	0	0	0	0	17	0	0	0	0	0	0	0	0	0	811.61	0	0	0	0	0	162.322	0.001	-17.3085	1.87076e-09	2.33687e-07	d__Bacteria;p__Acidobacteria;c__Acidobacteriia;o__Acidobacteriales;f__Acidobacteriaceae;g__Candidatus Koribacter;s__uncultured Acidobacteria bacterium
ASV10650	0	0	0	0	0	4	0	0	0	0	0	0	0	0	0	221.9	0	0	0	0	0.001	44.38	15.4376	0.0625063	0.332325	d__Bacteria;p__Proteobacteria;c__Alphaproteobacteria;o__Hyphomicrobiales;f__Rhizobiaceae;g__Pararhizobium;s__Pararhizobium sp001425605
ASV10651	0	0	0	0	0	0	0	0	0	4	0	0	0	0	0	0	0	0	0	178.95	0.001	35.79	15.1273	0.250007	0.441558	d__Bacteria;p__Nitrospirae;c__Nitrospira;o__Nitrospirales;f__Nitrospiraceae;g__Leptospirillum;s__Leptospirillum ferrooxidans
ASV10652	0	4	0	0	0	0	0	0	0	0	0	180.35	0	0	0	0	0	0	0	0	36.07	0.001	-15.1385	0.125007	0.349364	d__Bacteria;p__Planctomycetes;c__Planctomycetia;o__Gemmatales;f__Gemmataceae;g__Fimbriiglobus;s__Fimbriiglobus ruber
ASV10653	0	0	0	0	0	4	0	0	0	0	0	0	0	0	0	221.9	0	0	0	0	0.001	44.38	15.4376	0.0625063	0.332325	d__Bacteria;p__Proteobacteria;c__Betaproteobacteria;o__Burkholderiales;f__Burkholderiaceae;g__Paraburkholderia;s__Paraburkholderia graminis
ASV10654	0	4	0	0	0	0	0	0	0	0	0	180.35	0	0	0	0	0	0	0	0	36.07	0.001	-15.1385	0.125007	0.349364	d__Bacteria;p__Proteobacteria;c__Alphaproteobacteria;o__Rhodospirillales;f__Azospirillaceae;g__Nitrospirillum;s__Nitrospirillum amazonense
ASV10655	0	0	0	0	0	0	0	0	4	0	0	0	0	0	0	0	0	0	185.43	0	0.001	37.086	15.1786	0.0625063	0.332325	d__Bacteria;p__Acidobacteria;c__Vicinamibacteria;o__norank;f__Vicinamibacteraceae;g__Vicinamibacter
ASV10656	0	0	0	0	4	0	0	0	0	0	0	0	0	0	190.97	0	0	0	0	0	38.194	0.001	-15.2211	0.00781469	0.0892477	d__Bacteria;p__Proteobacteria;c__Gammaproteobacteria;o__norank;f__norank;g__Acidibacter;s__uncultured bacterium
ASV10657	0	0	0	4	0	0	0	0	0	0	0	0	0	185.37	0	0	0	0	0	0	37.074	0.001	-15.1781	0.0625063	0.332325	d__Bacteria;p__Bacteroidetes;c__Sphingobacteriia;o__Sphingobacteriales;f__Sphingobacteriaceae;g__Mucilaginibacter;s__Mucilaginibacter gossypii
ASV10658	0	0	0	0	4	0	0	0	0	0	0	0	0	0	190.97	0	0	0	0	0	38.194	0.001	-15.2211	0.00781469	0.0892477	d__Bacteria;p__Planctomycetes;c__Planctomycetia;o__Gemmatales;f__Gemmataceae;g__Fimbriiglobus;s__Fimbriiglobus ruber
ASV10659	0	0	0	0	0	0	0	0	0	4	0	0	0	0	0	0	0	0	0	178.95	0.001	35.79	15.1273	0.250007	0.441558	d__Bacteria;p__Proteobacteria;c__Deltaproteobacteria;o__Desulfuromonadales;f__Geobacteraceae;g__Geobacter;s__Geobacter anodireducens
ASV1066	0	0	0	17	0	0	0	0	0	0	0	0	0	787.84	0	0	0	0	0	0	157.568	0.001	-17.2656	7.64107e-06	0.000371087	d__Bacteria;p__Bacteroidetes;c__Chitinophagia;o__Chitinophagales;f__Chitinophagaceae;g__Puia;s__uncultured bacterium
ASV10660	4	0	0	0	0	0	0	0	0	0	177.19	0	0	0	0	0	0	0	0	0	35.438	0.001	-15.113	0.125007	0.349364	d__Bacteria;p__Fibrobacteres;c__Fibrobacteria;o__Fibrobacterales;f__Fibrobacteraceae;g__Fibrobacter;s__Fibrobacter sp900215325
ASV10661	0	0	0	0	0	0	0	0	0	4	0	0	0	0	0	0	0	0	0	178.95	0.001	35.79	15.1273	0.250007	0.441558	d__Bacteria;p__Chloroflexi;c__Ktedonobacteria;o__Thermogemmatisporales;f__Thermogemmatisporaceae;g__Thermogemmatispora;s__Thermogemmatispora carboxidivorans
ASV10662	0	0	0	0	0	0	4	0	0	0	0	0	0	0	0	0	169.03	0	0	0	0.001	33.806	15.045	0.125007	0.349364	d__Bacteria;p__Acidobacteria;c__Acidobacteriia;o__Acidobacteriales;f__Acidobacteriaceae;g__Candidatus Koribacter;s__uncultured bacterium
ASV10663	0	0	0	0	4	0	0	0	0	0	0	0	0	0	190.97	0	0	0	0	0	38.194	0.001	-15.2211	0.00781469	0.0892477	d__Bacteria;p__Bacteroidetes;c__Chitinophagia;o__Chitinophagales;f__Chitinophagaceae;g__Flavisolibacter;s__uncultured bacterium
ASV10664	0	0	0	0	0	0	4	0	0	0	0	0	0	0	0	0	169.03	0	0	0	0.001	33.806	15.045	0.125007	0.349364	d__Bacteria;p__Proteobacteria;c__Betaproteobacteria;o__Burkholderiales;f__Comamonadaceae;g__Ramlibacter
ASV10665	0	0	0	0	0	4	0	0	0	0	0	0	0	0	0	221.9	0	0	0	0	0.001	44.38	15.4376	0.0625063	0.332325	d__Bacteria;p__Acidobacteria;c__Vicinamibacteria;o__norank;f__Vicinamibacteraceae;g__Vicinamibacter
ASV10666	0	4	0	0	0	0	0	0	0	0	0	180.35	0	0	0	0	0	0	0	0	36.07	0.001	-15.1385	0.125007	0.349364	d__Bacteria;p__Proteobacteria;c__Alphaproteobacteria;o__Hyphomicrobiales;f__Kaistiaceae;g__Bauldia;s__uncultured bacterium
ASV10667	4	0	0	0	0	0	0	0	0	0	177.19	0	0	0	0	0	0	0	0	0	35.438	0.001	-15.113	0.125007	0.349364	d__Bacteria;p__Planctomycetes;c__Phycisphaerae;o__Phycisphaerales;f__Phycisphaeraceae;g__Phycisphaera;s__uncultured Planctomycetales bacterium
ASV10668	0	0	0	0	0	0	4	0	0	0	0	0	0	0	0	0	169.03	0	0	0	0.001	33.806	15.045	0.125007	0.349364	d__Bacteria;p__Actinobacteria;c__Acidimicrobiia;o__Acidimicrobiales;f__Acidimicrobiaceae;g__Acidimicrobium;s__Acidimicrobium ferrooxidans
ASV10669	0	0	0	0	4	0	0	0	0	0	0	0	0	0	190.97	0	0	0	0	0	38.194	0.001	-15.2211	0.00781469	0.0892477	d__Bacteria;p__Proteobacteria;c__Betaproteobacteria;o__Nitrosomonadales;f__Sterolibacteriaceae;g__Sterolibacterium
ASV1067	0	0	0	0	0	0	0	0	17	0	0	0	0	0	0	0	0	0	788.1	0	0.001	157.62	17.2661	1.91098e-06	0.000112236	d__Bacteria;p__Acidobacteria;c__Acidobacteriia;o__Acidobacteriales;f__Acidobacteriaceae;g__Candidatus Koribacter;s__uncultured Acidobacteria bacterium
ASV10670	0	0	0	0	4	0	0	0	0	0	0	0	0	0	190.97	0	0	0	0	0	38.194	0.001	-15.2211	0.00781469	0.0892477	Unclassified
ASV10671	0	0	0	0	4	0	0	0	0	0	0	0	0	0	190.97	0	0	0	0	0	38.194	0.001	-15.2211	0.00781469	0.0892477	d__Bacteria;p__Proteobacteria;c__Alphaproteobacteria;o__Hyphomicrobiales;f__Xanthobacteraceae;g__Pseudolabrys;s__Pseudolabrys taiwanensis
ASV10672	0	0	0	0	0	0	0	0	4	0	0	0	0	0	0	0	0	0	185.43	0	0.001	37.086	15.1786	0.0625063	0.332325	d__Bacteria;p__Proteobacteria;c__Alphaproteobacteria;o__Hyphomicrobiales;f__Bradyrhizobiaceae;g__Bradyrhizobium;s__Bradyrhizobium ottawaense_A
ASV10673	0	0	0	4	0	0	0	0	0	0	0	0	0	185.37	0	0	0	0	0	0	37.074	0.001	-15.1781	0.0625063	0.332325	d__Bacteria;p__Proteobacteria;c__Gammaproteobacteria;o__norank;f__norank;g__Acidibacter;s__uncultured bacterium
ASV10674	0	4	0	0	0	0	0	0	0	0	0	180.35	0	0	0	0	0	0	0	0	36.07	0.001	-15.1385	0.125007	0.349364	Unclassified
ASV10675	0	0	0	0	4	0	0	0	0	0	0	0	0	0	190.97	0	0	0	0	0	38.194	0.001	-15.2211	0.00781469	0.0892477	d__Bacteria;p__Proteobacteria;c__Betaproteobacteria;o__Burkholderiales;f__Comamonadaceae;g__Ramlibacter;s__Ramlibacter tataouinensis_B
ASV10676	0	0	0	0	0	4	0	0	0	0	0	0	0	0	0	221.9	0	0	0	0	0.001	44.38	15.4376	0.0625063	0.332325	d__Bacteria;p__Actinobacteria;c__Acidimicrobiia;o__Acidimicrobiales;f__Acidimicrobiaceae;g__Acidimicrobium;s__Acidimicrobium ferrooxidans
ASV10677	0	0	0	0	4	0	0	0	0	0	0	0	0	0	190.97	0	0	0	0	0	38.194	0.001	-15.2211	0.00781469	0.0892477	d__Bacteria;p__Firmicutes;c__Clostridia;o__Eubacteriales;f__Syntrophomonadaceae;g__Dethiobacter;s__uncultured bacterium
ASV10678	4	0	0	0	0	0	0	0	0	0	177.19	0	0	0	0	0	0	0	0	0	35.438	0.001	-15.113	0.125007	0.349364	d__Bacteria;p__Acidobacteria;c__Acidobacteriia;o__Bryobacterales;f__Solibacteraceae;g__Candidatus Solibacter;s__Solibacter usitatus
ASV10679	0	0	0	0	0	4	0	0	0	0	0	0	0	0	0	221.9	0	0	0	0	0.001	44.38	15.4376	0.0625063	0.332325	d__Bacteria;p__Planctomycetes;c__Planctomycetia;o__Pirellulales;f__Pirellulaceae;g__Blastopirellula;s__Blastopirellula retiformator
ASV1068	0	0	17	0	0	0	0	0	0	0	0	0	717.06	0	0	0	0	0	0	0	143.412	0.001	-17.1298	0.0009771	0.0195951	d__Bacteria;p__Proteobacteria;c__Alphaproteobacteria;o__Hyphomicrobiales;f__norank;g__Pseudorhodoplanes;s__Pseudorhodoplanes sinuspersici
ASV10680	4	0	0	0	0	0	0	0	0	0	177.19	0	0	0	0	0	0	0	0	0	35.438	0.001	-15.113	0.125007	0.349364	d__Bacteria;p__Proteobacteria;c__Alphaproteobacteria;o__Sphingomonadales;f__Sphingomonadaceae;g__Allosphingosinicella;s__Allosphingosinicella sp013816585
ASV10681	4	0	0	0	0	0	0	0	0	0	177.19	0	0	0	0	0	0	0	0	0	35.438	0.001	-15.113	0.125007	0.349364	d__Bacteria;p__Acidobacteria;c__Vicinamibacteria;o__norank;f__Vicinamibacteraceae;g__Luteitalea;s__Luteitalea pratensis
ASV10682	0	4	0	0	0	0	0	0	0	0	0	180.35	0	0	0	0	0	0	0	0	36.07	0.001	-15.1385	0.125007	0.349364	d__Bacteria;p__Verrucomicrobia;c__Verrucomicrobiae;o__Verrucomicrobiales;f__Verrucomicrobia subdivision 3;g__Pedosphaera;s__uncultured Verrucomicrobia bacterium
ASV10683	0	0	0	0	4	0	0	0	0	0	0	0	0	0	190.97	0	0	0	0	0	38.194	0.001	-15.2211	0.00781469	0.0892477	d__Bacteria;p__Proteobacteria;c__Alphaproteobacteria;o__Hyphomicrobiales;f__Hyphomicrobiaceae;g__Methyloceanibacter;s__uncultured bacterium
ASV10684	4	0	0	0	0	0	0	0	0	0	177.19	0	0	0	0	0	0	0	0	0	35.438	0.001	-15.113	0.125007	0.349364	d__Bacteria;p__Acidobacteria;c__Blastocatellia;o__Blastocatellales;f__Blastocatellaceae
ASV10685	0	0	0	0	0	0	0	0	0	4	0	0	0	0	0	0	0	0	0	178.95	0.001	35.79	15.1273	0.250007	0.441558	d__Bacteria;p__Firmicutes;c__Clostridia;o__Eubacteriales;f__Peptococcaceae;g__Desulfitobacterium;s__Desulfitobacterium hafniense
ASV10686	0	0	0	0	4	0	0	0	0	0	0	0	0	0	190.97	0	0	0	0	0	38.194	0.001	-15.2211	0.00781469	0.0892477	d__Bacteria;p__Acidobacteria;c__Acidobacteriia;o__Acidobacteriales;f__Acidobacteriaceae;g__Candidatus Koribacter;s__uncultured bacterium
ASV10687	0	0	0	0	0	0	4	0	0	0	0	0	0	0	0	0	169.03	0	0	0	0.001	33.806	15.045	0.125007	0.349364	d__Bacteria;p__Gemmatimonadetes;c__Gemmatimonadetes;o__Gemmatimonadales;f__Gemmatimonadaceae;g__Gemmatirosa;s__Gemmatirosa kalamazoonesis
ASV10688	0	0	0	0	4	0	0	0	0	0	0	0	0	0	190.97	0	0	0	0	0	38.194	0.001	-15.2211	0.00781469	0.0892477	d__Bacteria;p__Acidobacteria;c__Acidobacteriia;o__Acidobacteriales;f__Acidobacteriaceae;g__Terracidiphilus;s__Terracidiphilus sp903849645
ASV10689	0	0	0	4	0	0	0	0	0	0	0	0	0	185.37	0	0	0	0	0	0	37.074	0.001	-15.1781	0.0625063	0.332325	d__Bacteria;p__Proteobacteria;c__Deltaproteobacteria;o__Desulfuromonadales
ASV1069	0	0	0	0	0	17	0	0	0	0	0	0	0	0	0	943.08	0	0	0	0	0.001	188.616	17.5251	1.91098e-06	0.000112236	d__Bacteria;p__Bacteroidetes;c__Chitinophagia;o__Chitinophagales;f__Chitinophagaceae;g__Sediminibacterium;s__Sediminibacterium magnilacihabitans
ASV10690	0	0	0	0	0	0	4	0	0	0	0	0	0	0	0	0	169.03	0	0	0	0.001	33.806	15.045	0.125007	0.349364	d__Bacteria;p__Acidobacteria;c__Acidobacteriia;o__Bryobacterales;f__Solibacteraceae;g__Candidatus Solibacter;s__Solibacter usitatus
ASV10691	0	4	0	0	0	0	0	0	0	0	0	180.35	0	0	0	0	0	0	0	0	36.07	0.001	-15.1385	0.125007	0.349364	d__Bacteria;p__Proteobacteria;c__Alphaproteobacteria;o__Rhodospirillales;f__Acetobacteraceae;g__Rhodopila
ASV10692	0	4	0	0	0	0	0	0	0	0	0	180.35	0	0	0	0	0	0	0	0	36.07	0.001	-15.1385	0.125007	0.349364	d__Bacteria;p__Firmicutes;c__Bacilli;o__Bacillales;f__Staphylococcaceae;g__Staphylococcus;s__Staphylococcus capitis
ASV10693	0	0	0	0	4	0	0	0	0	0	0	0	0	0	190.97	0	0	0	0	0	38.194	0.001	-15.2211	0.00781469	0.0892477	d__Bacteria;p__Acidobacteria;c__Acidobacteriia;o__Acidobacteriales;f__Acidobacteriaceae;g__Occallatibacter;s__uncultured Acidobacteria bacterium
ASV10694	0	0	0	4	0	0	0	0	0	0	0	0	0	185.37	0	0	0	0	0	0	37.074	0.001	-15.1781	0.0625063	0.332325	d__Bacteria;p__Acidobacteria;c__Acidobacteriia;o__Acidobacteriales;f__Acidobacteriaceae;g__Silvibacterium;s__Silvibacterium dinghuense
ASV10695	0	0	0	0	4	0	0	0	0	0	0	0	0	0	190.97	0	0	0	0	0	38.194	0.001	-15.2211	0.00781469	0.0892477	Unclassified
ASV10696	0	0	0	0	0	0	4	0	0	0	0	0	0	0	0	0	169.03	0	0	0	0.001	33.806	15.045	0.125007	0.349364	d__Bacteria;p__Acidobacteria;c__Blastocatellia;o__norank;f__norank;g__Chloracidobacterium
ASV10697	0	0	0	0	0	0	0	0	0	4	0	0	0	0	0	0	0	0	0	178.95	0.001	35.79	15.1273	0.250007	0.441558	d__Bacteria;p__Verrucomicrobia;c__Verrucomicrobiae;o__Verrucomicrobiales;f__Verrucomicrobia subdivision 3;g__Pedosphaera
ASV10698	0	0	0	4	0	0	0	0	0	0	0	0	0	185.37	0	0	0	0	0	0	37.074	0.001	-15.1781	0.0625063	0.332325	d__Bacteria;p__Proteobacteria;c__Alphaproteobacteria;o__Rhodospirillales;f__Rhodospirillaceae;g__Dongia;s__Dongia mobilis
ASV10699	0	4	0	0	0	0	0	0	0	0	0	180.35	0	0	0	0	0	0	0	0	36.07	0.001	-15.1385	0.125007	0.349364	d__Bacteria;p__Proteobacteria;c__Alphaproteobacteria;o__Hyphomicrobiales;f__Hyphomicrobiaceae;g__Rhodoplanes;s__uncultured bacterium
ASV107	0	0	0	0	0	0	0	0	0	73	0	0	0	0	0	0	0	0	0	3265.78	0.001	653.156	19.3171	2.81861e-17	1.00382e-14	d__Bacteria;p__Proteobacteria;c__Betaproteobacteria;o__Burkholderiales;f__norank;g__Ideonella
ASV1070	0	0	0	0	0	0	0	0	0	17	0	0	0	0	0	0	0	0	0	760.52	0.001	152.104	17.2147	0.000244331	0.00670089	d__Bacteria;p__Proteobacteria;c__Alphaproteobacteria;o__Hyphomicrobiales;f__Phyllobacteriaceae;g__Phyllobacterium;s__Phyllobacterium zundukense
ASV10700	4	0	0	0	0	0	0	0	0	0	177.19	0	0	0	0	0	0	0	0	0	35.438	0.001	-15.113	0.125007	0.349364	d__Bacteria;p__Bacteroidetes;c__Chitinophagia;o__Chitinophagales;f__Chitinophagaceae;g__Terrimonas;s__Terrimonas ferruginea
ASV10701	0	0	0	4	0	0	0	0	0	0	0	0	0	185.37	0	0	0	0	0	0	37.074	0.001	-15.1781	0.0625063	0.332325	d__Bacteria;p__Planctomycetes;c__Planctomycetia;o__Gemmatales;f__Gemmataceae;g__Fimbriiglobus;s__Fimbriiglobus ruber
ASV10702	0	0	4	0	0	0	0	0	0	0	0	0	168.72	0	0	0	0	0	0	0	33.744	0.001	-15.0423	0.250007	0.441558	d__Bacteria;p__Proteobacteria;c__Alphaproteobacteria;o__Hyphomicrobiales;f__Bradyrhizobiaceae;g__Bradyrhizobium
ASV10703	0	0	0	4	0	0	0	0	0	0	0	0	0	185.37	0	0	0	0	0	0	37.074	0.001	-15.1781	0.0625063	0.332325	d__Bacteria;p__Acidobacteria;c__Acidobacteriia;o__Acidobacteriales;f__Acidobacteriaceae;g__Terracidiphilus
ASV10704	0	4	0	0	0	0	0	0	0	0	0	180.35	0	0	0	0	0	0	0	0	36.07	0.001	-15.1385	0.125007	0.349364	d__Bacteria;p__Verrucomicrobia;c__Spartobacteria;o__Chthoniobacterales;f__Chthoniobacteraceae;g__Chthoniobacter;s__Chthoniobacter flavus
ASV10705	0	4	0	0	0	0	0	0	0	0	0	180.35	0	0	0	0	0	0	0	0	36.07	0.001	-15.1385	0.125007	0.349364	d__Bacteria;p__Verrucomicrobia;c__Verrucomicrobiae;o__Verrucomicrobiales;f__Verrucomicrobia subdivision 3;g__Pedosphaera;s__uncultured bacterium
ASV10706	0	0	0	4	0	0	0	0	0	0	0	0	0	185.37	0	0	0	0	0	0	37.074	0.001	-15.1781	0.0625063	0.332325	d__Bacteria;p__Planctomycetes;c__Planctomycetia;o__Pirellulales;f__Pirellulaceae;g__Pirellula;s__uncultured bacterium
ASV10707	4	0	0	0	0	0	0	0	0	0	177.19	0	0	0	0	0	0	0	0	0	35.438	0.001	-15.113	0.125007	0.349364	d__Bacteria;p__Proteobacteria;c__Alphaproteobacteria;o__Hyphomicrobiales;f__norank;g__Nordella;s__Nordella sp011046735
ASV10708	0	0	4	0	0	0	0	0	0	0	0	0	168.72	0	0	0	0	0	0	0	33.744	0.001	-15.0423	0.250007	0.441558	d__Bacteria;p__Acidobacteria;c__Acidobacteriia;o__Acidobacteriales;f__Acidobacteriaceae;g__Edaphobacter;s__Edaphobacter modestus
ASV10709	0	0	0	4	0	0	0	0	0	0	0	0	0	185.37	0	0	0	0	0	0	37.074	0.001	-15.1781	0.0625063	0.332325	d__Bacteria;p__Proteobacteria;c__Alphaproteobacteria;o__Rhodospirillales;f__Azospirillaceae;g__Nitrospirillum;s__Nitrospirillum amazonense
ASV1071	0	0	0	17	0	0	0	0	0	0	0	0	0	787.84	0	0	0	0	0	0	157.568	0.001	-17.2656	7.64107e-06	0.000371087	d__Bacteria;p__Proteobacteria;c__Gammaproteobacteria;o__Xanthomonadales;f__Rhodanobacteraceae;g__Metallibacterium;s__Metallibacterium scheffleri
ASV10710	0	4	0	0	0	0	0	0	0	0	0	180.35	0	0	0	0	0	0	0	0	36.07	0.001	-15.1385	0.125007	0.349364	d__Bacteria;p__Verrucomicrobia;c__Spartobacteria;o__norank;f__norank;g__Candidatus Xiphinematobacter;s__uncultured bacterium
ASV10711	4	0	0	0	0	0	0	0	0	0	177.19	0	0	0	0	0	0	0	0	0	35.438	0.001	-15.113	0.125007	0.349364	Unclassified
ASV10712	0	0	0	0	4	0	0	0	0	0	0	0	0	0	190.97	0	0	0	0	0	38.194	0.001	-15.2211	0.00781469	0.0892477	d__Bacteria;p__Proteobacteria;c__Alphaproteobacteria;o__Hyphomicrobiales;f__Bradyrhizobiaceae;g__Bradyrhizobium;s__Bradyrhizobium sp000026145
ASV10713	0	0	0	0	4	0	0	0	0	0	0	0	0	0	190.97	0	0	0	0	0	38.194	0.001	-15.2211	0.00781469	0.0892477	d__Bacteria;p__Acidobacteria;c__Acidobacteriia;o__Bryobacterales;f__Solibacteraceae;g__Candidatus Solibacter;s__Solibacter usitatus
ASV10714	0	0	0	0	0	0	0	0	0	4	0	0	0	0	0	0	0	0	0	178.95	0.001	35.79	15.1273	0.250007	0.441558	d__Bacteria;p__Planctomycetes;c__Phycisphaerae;o__Sedimentisphaerales;f__Anaerohalosphaeraceae;g__Anaerohalosphaera;s__Anaerohalosphaera lusitana
ASV10715	0	0	0	0	0	0	4	0	0	0	0	0	0	0	0	0	169.03	0	0	0	0.001	33.806	15.045	0.125007	0.349364	d__Bacteria;p__Bacteroidetes;c__Sphingobacteriia;o__Sphingobacteriales;f__Sphingobacteriaceae;g__Solitalea;s__uncultured bacterium
ASV10716	0	0	0	0	0	0	4	0	0	0	0	0	0	0	0	0	169.03	0	0	0	0.001	33.806	15.045	0.125007	0.349364	d__Bacteria;p__Planctomycetes;c__Planctomycetia;o__Gemmatales;f__Gemmataceae;g__Fimbriiglobus;s__Fimbriiglobus ruber
ASV10717	0	0	0	4	0	0	0	0	0	0	0	0	0	185.37	0	0	0	0	0	0	37.074	0.001	-15.1781	0.0625063	0.332325	d__Bacteria;p__Acidobacteria;c__Acidobacteriia;o__Acidobacteriales;f__Acidobacteriaceae;g__Candidatus Koribacter;s__uncultured bacterium
ASV10718	0	0	0	0	0	0	4	0	0	0	0	0	0	0	0	0	169.03	0	0	0	0.001	33.806	15.045	0.125007	0.349364	d__Bacteria;p__Firmicutes;c__Clostridia;o__Eubacteriales;f__Peptococcaceae;g__Desulfofundulus;s__Desulfofundulus kuznetsovii
ASV10719	0	4	0	0	0	0	0	0	0	0	0	180.35	0	0	0	0	0	0	0	0	36.07	0.001	-15.1385	0.125007	0.349364	d__Bacteria;p__Planctomycetes;c__Planctomycetia;o__Isosphaerales;f__Isosphaeraceae;g__Aquisphaera;s__Aquisphaera giovannonii
ASV1072	0	0	0	0	0	0	0	0	0	17	0	0	0	0	0	0	0	0	0	760.52	0.001	152.104	17.2147	0.000244331	0.00670089	d__Bacteria;p__Armatimonadetes;c__Chthonomonadetes;o__Chthonomonadales;f__Chthonomonadaceae;g__Chthonomonas;s__Chthonomonas calidirosea
ASV10720	0	0	0	4	0	0	0	0	0	0	0	0	0	185.37	0	0	0	0	0	0	37.074	0.001	-15.1781	0.0625063	0.332325	d__Bacteria;p__Proteobacteria;c__Betaproteobacteria;o__Nitrosomonadales;f__Sterolibacteriaceae;g__Methyloversatilis;s__Methyloversatilis discipulorum_A
ASV10721	0	4	0	0	0	0	0	0	0	0	0	180.35	0	0	0	0	0	0	0	0	36.07	0.001	-15.1385	0.125007	0.349364	d__Bacteria;p__Proteobacteria;c__Alphaproteobacteria;o__Hyphomicrobiales;f__Bradyrhizobiaceae;g__Bradyrhizobium;s__Bradyrhizobium sp000938305
ASV10722	0	0	0	0	0	0	4	0	0	0	0	0	0	0	0	0	169.03	0	0	0	0.001	33.806	15.045	0.125007	0.349364	d__Bacteria;p__Proteobacteria;c__Betaproteobacteria;o__Burkholderiales;f__Burkholderiaceae;g__Paraburkholderia;s__Paraburkholderia sp013426895
ASV10723	0	0	0	0	0	0	0	0	0	4	0	0	0	0	0	0	0	0	0	178.95	0.001	35.79	15.1273	0.250007	0.441558	d__Bacteria;p__Proteobacteria;c__Betaproteobacteria;o__Burkholderiales;f__Oxalobacteraceae;g__Pseudoduganella;s__Pseudoduganella albidiflava
ASV10724	0	4	0	0	0	0	0	0	0	0	0	180.35	0	0	0	0	0	0	0	0	36.07	0.001	-15.1385	0.125007	0.349364	d__Bacteria;p__Proteobacteria;c__Betaproteobacteria;o__Burkholderiales;f__norank;g__Rhizobacter;s__Rhizobacter gummiphilus
ASV10725	0	0	0	0	0	0	0	0	4	0	0	0	0	0	0	0	0	0	185.43	0	0.001	37.086	15.1786	0.0625063	0.332325	d__Bacteria;p__Proteobacteria;c__Betaproteobacteria;o__Burkholderiales;f__Comamonadaceae;g__Ramlibacter;s__uncultured bacterium
ASV10726	0	0	4	0	0	0	0	0	0	0	0	0	168.72	0	0	0	0	0	0	0	33.744	0.001	-15.0423	0.250007	0.441558	d__Bacteria;p__Actinobacteria;c__Rubrobacteria;o__Gaiellales;f__Gaiellaceae;g__Gaiella;s__Gaiella occulta
ASV10727	0	0	0	0	0	4	0	0	0	0	0	0	0	0	0	221.9	0	0	0	0	0.001	44.38	15.4376	0.0625063	0.332325	d__Bacteria;p__Planctomycetes;c__Phycisphaerae;o__Sedimentisphaerales;f__Anaerohalosphaeraceae;g__Anaerohalosphaera;s__Anaerohalosphaera lusitana
ASV10728	0	0	0	0	0	0	0	0	4	0	0	0	0	0	0	0	0	0	185.43	0	0.001	37.086	15.1786	0.0625063	0.332325	d__Bacteria;p__Chloroflexi;c__Ktedonobacteria;o__Thermogemmatisporales;f__Thermogemmatisporaceae;g__Thermogemmatispora;s__Thermogemmatispora carboxidivorans
ASV10729	0	0	0	0	0	4	0	0	0	0	0	0	0	0	0	221.9	0	0	0	0	0.001	44.38	15.4376	0.0625063	0.332325	d__Bacteria;p__Planctomycetes;c__Planctomycetia;o__Gemmatales;f__Gemmataceae;g__Fimbriiglobus;s__Fimbriiglobus ruber
ASV1073	0	0	17	0	0	0	0	0	0	0	0	0	717.06	0	0	0	0	0	0	0	143.412	0.001	-17.1298	0.0009771	0.0195951	d__Bacteria;p__Planctomycetes;c__Planctomycetia;o__Gemmatales;f__Gemmataceae;g__Fimbriiglobus;s__Fimbriiglobus ruber
ASV10730	0	4	0	0	0	0	0	0	0	0	0	180.35	0	0	0	0	0	0	0	0	36.07	0.001	-15.1385	0.125007	0.349364	d__Bacteria;p__Nitrospirae;c__Nitrospira;o__norank;f__norank;g__norank;s__uncultured bacterium
ASV10731	0	0	0	0	0	4	0	0	0	0	0	0	0	0	0	221.9	0	0	0	0	0.001	44.38	15.4376	0.0625063	0.332325	d__Bacteria;p__Proteobacteria;c__Betaproteobacteria;o__Burkholderiales;f__Burkholderiaceae;g__Paraburkholderia;s__Paraburkholderia rhynchosiae
ASV10732	0	0	0	4	0	0	0	0	0	0	0	0	0	185.37	0	0	0	0	0	0	37.074	0.001	-15.1781	0.0625063	0.332325	d__Bacteria;p__Planctomycetes;c__Planctomycetia;o__Gemmatales;f__Gemmataceae;g__Fimbriiglobus;s__Fimbriiglobus ruber
ASV10733	0	0	0	0	0	0	0	0	4	0	0	0	0	0	0	0	0	0	185.43	0	0.001	37.086	15.1786	0.0625063	0.332325	d__Bacteria;p__Bacteroidetes;c__Sphingobacteriia;o__Sphingobacteriales;f__Sphingobacteriaceae;g__Daejeonella;s__Daejeonella sp002257025
ASV10734	4	0	0	0	0	0	0	0	0	0	177.19	0	0	0	0	0	0	0	0	0	35.438	0.001	-15.113	0.125007	0.349364	d__Bacteria;p__Proteobacteria;c__Oligoflexia;o__Bdellovibrionales;f__Bdellovibrionaceae;g__Bdellovibrio;s__uncultured bacterium
ASV10735	0	0	0	0	4	0	0	0	0	0	0	0	0	0	190.97	0	0	0	0	0	38.194	0.001	-15.2211	0.00781469	0.0892477	d__Bacteria;p__Proteobacteria;c__Betaproteobacteria;o__norank;f__Casimicrobiaceae;g__Casimicrobium;s__Casimicrobium huifangae
ASV10736	0	0	0	0	0	0	0	0	0	4	0	0	0	0	0	0	0	0	0	178.95	0.001	35.79	15.1273	0.250007	0.441558	d__Bacteria;p__Proteobacteria;c__Deltaproteobacteria;o__Desulfuromonadales;f__Geobacteraceae;g__Geobacter;s__Geobacter metallireducens
ASV10737	0	0	0	0	0	0	0	0	0	4	0	0	0	0	0	0	0	0	0	178.95	0.001	35.79	15.1273	0.250007	0.441558	d__Bacteria;p__Planctomycetes;c__Planctomycetia;o__Gemmatales;f__Gemmataceae;g__Fimbriiglobus;s__Fimbriiglobus ruber
ASV10738	0	4	0	0	0	0	0	0	0	0	0	180.35	0	0	0	0	0	0	0	0	36.07	0.001	-15.1385	0.125007	0.349364	d__Bacteria;p__Chloroflexi;c__Ktedonobacteria;o__Ktedonobacterales;f__Ktedonosporobacteraceae;g__Ktedonosporobacter;s__Ktedonosporobacter rubrisoli
ASV10739	0	0	0	0	0	4	0	0	0	0	0	0	0	0	0	221.9	0	0	0	0	0.001	44.38	15.4376	0.0625063	0.332325	d__Bacteria;p__Proteobacteria;c__Alphaproteobacteria;o__Hyphomicrobiales;f__Xanthobacteraceae;g__Pseudolabrys;s__uncultured bacterium
ASV1074	0	0	0	0	0	0	0	0	0	17	0	0	0	0	0	0	0	0	0	760.52	0.001	152.104	17.2147	0.000244331	0.00670089	Unclassified
ASV10740	0	0	0	0	4	0	0	0	0	0	0	0	0	0	190.97	0	0	0	0	0	38.194	0.001	-15.2211	0.00781469	0.0892477	d__Bacteria;p__Bacteroidetes;c__Sphingobacteriia;o__Sphingobacteriales;f__Sphingobacteriaceae;g__Mucilaginibacter;s__Mucilaginibacter ginsenosidivorans
ASV10741	0	0	4	0	0	0	0	0	0	0	0	0	168.72	0	0	0	0	0	0	0	33.744	0.001	-15.0423	0.250007	0.441558	d__Bacteria;p__Bacteroidetes;c__Sphingobacteriia;o__Sphingobacteriales;f__Sphingobacteriaceae;g__Mucilaginibacter;s__Mucilaginibacter kameinonensis
ASV10742	0	0	0	0	4	0	0	0	0	0	0	0	0	0	190.97	0	0	0	0	0	38.194	0.001	-15.2211	0.00781469	0.0892477	d__Bacteria;p__Acidobacteria;c__Acidobacteriia;o__Acidobacteriales;f__Acidobacteriaceae;g__Terracidiphilus;s__Terracidiphilus sp903849645
ASV10743	0	0	0	0	0	4	0	0	0	0	0	0	0	0	0	221.9	0	0	0	0	0.001	44.38	15.4376	0.0625063	0.332325	d__Bacteria;p__Proteobacteria;c__Gammaproteobacteria;o__Legionellales;f__Coxiellaceae;g__Candidatus Berkiella;s__uncultured bacterium
ASV10744	0	0	0	0	0	0	0	0	0	4	0	0	0	0	0	0	0	0	0	178.95	0.001	35.79	15.1273	0.250007	0.441558	d__Bacteria;p__Proteobacteria;c__Alphaproteobacteria;o__Rickettsiales;f__Anaplasmataceae;g__Wolbachia;s__Wolbachia sp902636535
ASV10745	0	0	0	0	0	0	0	0	4	0	0	0	0	0	0	0	0	0	185.43	0	0.001	37.086	15.1786	0.0625063	0.332325	d__Bacteria;p__Proteobacteria;c__Alphaproteobacteria;o__Rhodospirillales;f__Stellaceae;g__Stella;s__Stella sp006738865
ASV10746	0	0	0	0	4	0	0	0	0	0	0	0	0	0	190.97	0	0	0	0	0	38.194	0.001	-15.2211	0.00781469	0.0892477	d__Bacteria;p__Verrucomicrobia;c__Spartobacteria;o__Chthoniobacterales;f__Chthoniobacteraceae;g__Chthoniobacter;s__Chthoniobacter flavus
ASV10747	0	4	0	0	0	0	0	0	0	0	0	180.35	0	0	0	0	0	0	0	0	36.07	0.001	-15.1385	0.125007	0.349364	d__Bacteria;p__Proteobacteria;c__Deltaproteobacteria;o__Desulfuromonadales;f__Geobacteraceae;g__Geomonas;s__Geomonas pelophila
ASV10748	0	0	0	0	0	0	0	0	0	4	0	0	0	0	0	0	0	0	0	178.95	0.001	35.79	15.1273	0.250007	0.441558	d__Bacteria;p__Bacteroidetes;c__Flavobacteriia;o__Flavobacteriales;f__Flavobacteriaceae;g__Flavobacterium
ASV10749	0	4	0	0	0	0	0	0	0	0	0	180.35	0	0	0	0	0	0	0	0	36.07	0.001	-15.1385	0.125007	0.349364	d__Bacteria;p__Acidobacteria;c__Acidobacteriia;o__Bryobacterales;f__Solibacteraceae;g__Candidatus Solibacter;s__Solibacter usitatus
ASV1075	0	0	0	0	0	0	17	0	0	0	0	0	0	0	0	0	718.39	0	0	0	0.001	143.678	17.1325	7.64107e-06	0.000371087	Unclassified
ASV10750	0	0	0	4	0	0	0	0	0	0	0	0	0	185.37	0	0	0	0	0	0	37.074	0.001	-15.1781	0.0625063	0.332325	d__Bacteria;p__Chloroflexi;c__Ktedonobacteria;o__Ktedonobacterales;f__Ktedonosporobacteraceae;g__Ktedonosporobacter;s__Ktedonosporobacter rubrisoli
ASV10751	0	0	0	4	0	0	0	0	0	0	0	0	0	185.37	0	0	0	0	0	0	37.074	0.001	-15.1781	0.0625063	0.332325	d__Bacteria;p__Verrucomicrobia;c__Spartobacteria;o__Chthoniobacterales;f__Chthoniobacteraceae;g__Chthoniobacter;s__Chthoniobacter flavus
ASV10752	0	0	0	0	0	0	4	0	0	0	0	0	0	0	0	0	169.03	0	0	0	0.001	33.806	15.045	0.125007	0.349364	d__Bacteria;p__Proteobacteria;c__Alphaproteobacteria;o__Rhodospirillales;f__Stellaceae;g__Stella;s__Stella humosa
ASV10753	0	0	0	0	0	0	4	0	0	0	0	0	0	0	0	0	169.03	0	0	0	0.001	33.806	15.045	0.125007	0.349364	d__Bacteria;p__Bacteroidetes;c__Chitinophagia;o__Chitinophagales;f__Chitinophagaceae;g__Puia;s__uncultured bacterium
ASV10754	0	0	0	0	0	0	4	0	0	0	0	0	0	0	0	0	169.03	0	0	0	0.001	33.806	15.045	0.125007	0.349364	d__Bacteria;p__Proteobacteria;c__Gammaproteobacteria;o__Legionellales;f__Coxiellaceae;g__Aquicella;s__uncultured bacterium
ASV10755	0	0	4	0	0	0	0	0	0	0	0	0	168.72	0	0	0	0	0	0	0	33.744	0.001	-15.0423	0.250007	0.441558	d__Bacteria;p__Proteobacteria;c__Betaproteobacteria;o__Burkholderiales;f__Oxalobacteraceae;g__Massilia;s__Massilia sp001485665
ASV10756	0	0	4	0	0	0	0	0	0	0	0	0	168.72	0	0	0	0	0	0	0	33.744	0.001	-15.0423	0.250007	0.441558	d__Bacteria;p__Bacteroidetes;c__Sphingobacteriia;o__Sphingobacteriales;f__Sphingobacteriaceae;g__Mucilaginibacter;s__Mucilaginibacter ginsenosidivorans
ASV10757	0	4	0	0	0	0	0	0	0	0	0	180.35	0	0	0	0	0	0	0	0	36.07	0.001	-15.1385	0.125007	0.349364	d__Bacteria;p__Firmicutes;c__Clostridia;o__Eubacteriales;f__Peptococcaceae;g__Desulfofundulus;s__Desulfofundulus kuznetsovii
ASV10758	4	0	0	0	0	0	0	0	0	0	177.19	0	0	0	0	0	0	0	0	0	35.438	0.001	-15.113	0.125007	0.349364	d__Bacteria;p__Armatimonadetes;c__Armatimonadia;o__Capsulimonadales;f__Capsulimonadaceae;g__Capsulimonas;s__Capsulimonas corticalis
ASV10759	0	0	0	4	0	0	0	0	0	0	0	0	0	185.37	0	0	0	0	0	0	37.074	0.001	-15.1781	0.0625063	0.332325	d__Bacteria;p__Verrucomicrobia;c__Verrucomicrobiae;o__Verrucomicrobiales;f__Verrucomicrobia subdivision 3;g__Pedosphaera;s__uncultured bacterium
ASV1076	0	0	0	17	0	0	0	0	0	0	0	0	0	787.84	0	0	0	0	0	0	157.568	0.001	-17.2656	7.64107e-06	0.000371087	d__Bacteria;p__Proteobacteria;c__Gammaproteobacteria;o__Chromatiales;f__Thioalkalispiraceae;g__Sulfurivermis;s__Sulfurivermis fontis
ASV10760	0	0	0	0	0	0	0	0	4	0	0	0	0	0	0	0	0	0	185.43	0	0.001	37.086	15.1786	0.0625063	0.332325	d__Bacteria;p__Bacteroidetes;c__Sphingobacteriia;o__Sphingobacteriales;f__Sphingobacteriaceae;g__Mucilaginibacter;s__Mucilaginibacter xinganensis
ASV10761	0	0	0	0	4	0	0	0	0	0	0	0	0	0	190.97	0	0	0	0	0	38.194	0.001	-15.2211	0.00781469	0.0892477	d__Bacteria;p__Acidobacteria;c__Acidobacteriia;o__Acidobacteriales;f__Acidobacteriaceae;g__Occallatibacter;s__uncultured bacterium
ASV10762	0	0	0	0	0	0	0	0	0	4	0	0	0	0	0	0	0	0	0	178.95	0.001	35.79	15.1273	0.250007	0.441558	d__Bacteria;p__Bacteroidetes;c__Chitinophagia;o__Chitinophagales;f__Chitinophagaceae;g__Flavihumibacter;s__Flavihumibacter stibioxidans
ASV10763	0	0	0	0	0	0	4	0	0	0	0	0	0	0	0	0	169.03	0	0	0	0.001	33.806	15.045	0.125007	0.349364	d__Bacteria;p__Proteobacteria;c__Betaproteobacteria;o__Rhodocyclales;f__Rhodocyclaceae;g__Rhodocyclus;s__Rhodocyclus tenuis
ASV10764	4	0	0	0	0	0	0	0	0	0	177.19	0	0	0	0	0	0	0	0	0	35.438	0.001	-15.113	0.125007	0.349364	d__Bacteria;p__Proteobacteria;c__Betaproteobacteria;o__Burkholderiales;f__Oxalobacteraceae;g__Pseudoduganella
ASV10765	0	0	0	0	0	0	0	0	4	0	0	0	0	0	0	0	0	0	185.43	0	0.001	37.086	15.1786	0.0625063	0.332325	d__Bacteria;p__Planctomycetes;c__Planctomycetia;o__Gemmatales;f__Gemmataceae;g__Fimbriiglobus;s__Fimbriiglobus ruber
ASV10766	0	0	0	0	0	4	0	0	0	0	0	0	0	0	0	221.9	0	0	0	0	0.001	44.38	15.4376	0.0625063	0.332325	Unclassified
ASV10767	0	0	0	0	0	4	0	0	0	0	0	0	0	0	0	221.9	0	0	0	0	0.001	44.38	15.4376	0.0625063	0.332325	d__Bacteria;p__Planctomycetes;c__Phycisphaerae;o__Sedimentisphaerales;f__Anaerohalosphaeraceae;g__Anaerohalosphaera;s__Anaerohalosphaera lusitana
ASV10768	0	0	0	0	0	0	0	0	0	4	0	0	0	0	0	0	0	0	0	178.95	0.001	35.79	15.1273	0.250007	0.441558	d__Bacteria;p__Planctomycetes;c__Planctomycetia;o__Gemmatales;f__Gemmataceae;g__Fimbriiglobus;s__Fimbriiglobus ruber
ASV10769	0	0	0	0	0	0	0	0	0	4	0	0	0	0	0	0	0	0	0	178.95	0.001	35.79	15.1273	0.250007	0.441558	d__Bacteria;p__Acidobacteria;c__Acidobacteriia;o__Acidobacteriales;f__Acidobacteriaceae;g__Silvibacterium;s__Silvibacterium dinghuense
ASV1077	0	0	0	17	0	0	0	0	0	0	0	0	0	787.84	0	0	0	0	0	0	157.568	0.001	-17.2656	7.64107e-06	0.000371087	d__Bacteria;p__Acidobacteria;c__Acidobacteriia;o__Acidobacteriales;f__Acidobacteriaceae;g__Silvibacterium;s__Silvibacterium dinghuense
ASV10770	0	0	4	0	0	0	0	0	0	0	0	0	168.72	0	0	0	0	0	0	0	33.744	0.001	-15.0423	0.250007	0.441558	d__Bacteria;p__Proteobacteria;c__Gammaproteobacteria;o__Nevskiales;f__Steroidobacteraceae;g__Povalibacter;s__Povalibacter uvarum
ASV10771	0	0	0	0	0	0	0	0	4	0	0	0	0	0	0	0	0	0	185.43	0	0.001	37.086	15.1786	0.0625063	0.332325	d__Bacteria;p__Proteobacteria;c__Alphaproteobacteria;o__Hyphomicrobiales;f__Bradyrhizobiaceae;g__Bradyrhizobium
ASV10772	0	0	0	0	0	0	4	0	0	0	0	0	0	0	0	0	169.03	0	0	0	0.001	33.806	15.045	0.125007	0.349364	d__Bacteria;p__Bacteroidetes;c__Chitinophagia;o__Chitinophagales;f__Chitinophagaceae;g__Terrimonas;s__Terrimonas ferruginea
ASV10773	0	0	0	0	0	4	0	0	0	0	0	0	0	0	0	221.9	0	0	0	0	0.001	44.38	15.4376	0.0625063	0.332325	d__Bacteria;p__Firmicutes;c__Clostridia;o__Eubacteriales;f__Peptococcaceae;g__Desulfosporosinus;s__Desulfosporosinus orientis
ASV10774	0	0	0	0	0	0	0	0	4	0	0	0	0	0	0	0	0	0	185.43	0	0.001	37.086	15.1786	0.0625063	0.332325	d__Bacteria;p__Proteobacteria;c__Alphaproteobacteria;o__Sphingomonadales;f__Sphingomonadaceae;g__Sphingomonas;s__uncultured Sphingomonas sp.
ASV10775	0	0	0	0	4	0	0	0	0	0	0	0	0	0	190.97	0	0	0	0	0	38.194	0.001	-15.2211	0.00781469	0.0892477	d__Bacteria;p__Proteobacteria;c__Gammaproteobacteria;o__norank;f__norank;g__Acidibacter;s__uncultured bacterium
ASV10776	4	0	0	0	0	0	0	0	0	0	177.19	0	0	0	0	0	0	0	0	0	35.438	0.001	-15.113	0.125007	0.349364	d__Bacteria;p__Proteobacteria;c__Deltaproteobacteria;o__Myxococcales;f__Kofleriaceae;g__Haliangium;s__Haliangium ochraceum
ASV10777	0	4	0	0	0	0	0	0	0	0	0	180.35	0	0	0	0	0	0	0	0	36.07	0.001	-15.1385	0.125007	0.349364	d__Bacteria;p__Proteobacteria;c__Deltaproteobacteria;o__Myxococcales;f__Labilitrichaceae;g__Labilithrix;s__Labilithrix luteola
ASV10778	0	0	0	0	0	0	0	0	0	4	0	0	0	0	0	0	0	0	0	178.95	0.001	35.79	15.1273	0.250007	0.441558	d__Bacteria;p__Ignavibacteriae;c__Ignavibacteria;o__Ignavibacteriales;f__Ignavibacteriaceae;g__Ignavibacterium;s__uncultured bacterium
ASV10779	0	0	0	4	0	0	0	0	0	0	0	0	0	185.37	0	0	0	0	0	0	37.074	0.001	-15.1781	0.0625063	0.332325	d__Bacteria;p__Chloroflexi;c__Ktedonobacteria;o__Thermogemmatisporales;f__Thermogemmatisporaceae;g__Thermogemmatispora;s__Thermogemmatispora carboxidivorans
ASV1078	0	0	17	0	0	0	0	0	0	0	0	0	717.06	0	0	0	0	0	0	0	143.412	0.001	-17.1298	0.0009771	0.0195951	d__Bacteria;p__Proteobacteria;c__Alphaproteobacteria;o__Rhodospirillales;f__Acetobacteraceae;g__Acidisphaera
ASV10780	0	0	0	0	0	0	4	0	0	0	0	0	0	0	0	0	169.03	0	0	0	0.001	33.806	15.045	0.125007	0.349364	d__Bacteria;p__Planctomycetes;c__Planctomycetia;o__Isosphaerales;f__Isosphaeraceae;g__Aquisphaera;s__Aquisphaera giovannonii
ASV10781	0	0	0	4	0	0	0	0	0	0	0	0	0	185.37	0	0	0	0	0	0	37.074	0.001	-15.1781	0.0625063	0.332325	d__Bacteria;p__Proteobacteria;c__Alphaproteobacteria;o__Rhodospirillales;f__Azospirillaceae;g__Azospirillum;s__Azospirillum sp003116035
ASV10782	0	0	0	0	0	0	4	0	0	0	0	0	0	0	0	0	169.03	0	0	0	0.001	33.806	15.045	0.125007	0.349364	d__Bacteria;p__Proteobacteria;c__Betaproteobacteria;o__Burkholderiales;f__Burkholderiaceae;g__Paraburkholderia;s__Paraburkholderia sp900104795
ASV10783	0	0	0	0	0	0	4	0	0	0	0	0	0	0	0	0	169.03	0	0	0	0.001	33.806	15.045	0.125007	0.349364	d__Bacteria;p__Acidobacteria;c__Acidobacteriia;o__Acidobacteriales;f__Acidobacteriaceae;g__Candidatus Koribacter;s__uncultured bacterium
ASV10784	0	0	0	4	0	0	0	0	0	0	0	0	0	185.37	0	0	0	0	0	0	37.074	0.001	-15.1781	0.0625063	0.332325	d__Bacteria;p__Proteobacteria;c__Deltaproteobacteria;o__Myxococcales;f__Anaeromyxobacteraceae;g__Anaeromyxobacter;s__Anaeromyxobacter dehalogenans_B
ASV10785	0	0	4	0	0	0	0	0	0	0	0	0	168.72	0	0	0	0	0	0	0	33.744	0.001	-15.0423	0.250007	0.441558	d__Bacteria;p__Proteobacteria;c__Alphaproteobacteria;o__Hyphomicrobiales;f__Hyphomicrobiaceae;g__Rhodoplanes;s__Rhodoplanes serenus
ASV10786	0	0	0	0	0	4	0	0	0	0	0	0	0	0	0	221.9	0	0	0	0	0.001	44.38	15.4376	0.0625063	0.332325	d__Bacteria;p__Verrucomicrobia;c__Spartobacteria;o__Chthoniobacterales;f__Chthoniobacteraceae;g__Chthoniobacter;s__Chthoniobacter flavus
ASV10787	0	4	0	0	0	0	0	0	0	0	0	180.35	0	0	0	0	0	0	0	0	36.07	0.001	-15.1385	0.125007	0.349364	d__Bacteria;p__Verrucomicrobia;c__Spartobacteria;o__Chthoniobacterales;f__Chthoniobacteraceae;g__Chthoniobacter;s__Chthoniobacter flavus
ASV10788	0	4	0	0	0	0	0	0	0	0	0	180.35	0	0	0	0	0	0	0	0	36.07	0.001	-15.1385	0.125007	0.349364	d__Bacteria;p__Actinobacteria;c__Rubrobacteria;o__Gaiellales;f__Gaiellaceae;g__Gaiella;s__Gaiella occulta
ASV10789	0	0	0	0	0	4	0	0	0	0	0	0	0	0	0	221.9	0	0	0	0	0.001	44.38	15.4376	0.0625063	0.332325	d__Bacteria;p__Planctomycetes;c__Planctomycetia;o__Gemmatales;f__Gemmataceae;g__Gemmata;s__Gemmata massiliana_A
ASV1079	0	17	0	0	0	0	0	0	0	0	0	766.49	0	0	0	0	0	0	0	0	153.298	0.001	-17.226	7.64107e-06	0.000371087	d__Bacteria;p__Acidobacteria;c__Acidobacteriia;o__Acidobacteriales;f__Acidobacteriaceae;g__Candidatus Koribacter;s__uncultured bacterium
ASV10790	0	4	0	0	0	0	0	0	0	0	0	180.35	0	0	0	0	0	0	0	0	36.07	0.001	-15.1385	0.125007	0.349364	Unclassified
ASV10791	0	0	0	0	0	0	0	0	4	0	0	0	0	0	0	0	0	0	185.43	0	0.001	37.086	15.1786	0.0625063	0.332325	d__Bacteria;p__Proteobacteria;c__Alphaproteobacteria;o__Hyphomicrobiales;f__Bradyrhizobiaceae;g__Bradyrhizobium;s__Bradyrhizobium guangzhouense
ASV10792	0	0	0	0	0	0	0	0	4	0	0	0	0	0	0	0	0	0	185.43	0	0.001	37.086	15.1786	0.0625063	0.332325	d__Bacteria;p__Acidobacteria;c__Acidobacteriia;o__Acidobacteriales;f__Acidobacteriaceae;g__Edaphobacter;s__uncultured Acidobacteria bacterium
ASV10793	0	0	0	0	0	0	4	0	0	0	0	0	0	0	0	0	169.03	0	0	0	0.001	33.806	15.045	0.125007	0.349364	d__Bacteria;p__Proteobacteria;c__Alphaproteobacteria;o__Caulobacterales;f__Caulobacteraceae;g__Phenylobacterium;s__uncultured bacterium
ASV10794	0	0	0	0	0	0	0	0	0	4	0	0	0	0	0	0	0	0	0	178.95	0.001	35.79	15.1273	0.250007	0.441558	d__Bacteria;p__Planctomycetes;c__Planctomycetia;o__Isosphaerales;f__Isosphaeraceae;g__Singulisphaera;s__Singulisphaera sp900129635
ASV10795	4	0	0	0	0	0	0	0	0	0	177.19	0	0	0	0	0	0	0	0	0	35.438	0.001	-15.113	0.125007	0.349364	d__Bacteria;p__norank;c__Candidatus Babeliae;o__Candidatus Babeliales;f__Candidatus Babeliaceae;g__Candidatus Babela
ASV10796	0	0	0	0	0	0	0	0	0	4	0	0	0	0	0	0	0	0	0	178.95	0.001	35.79	15.1273	0.250007	0.441558	d__Bacteria;p__Proteobacteria;c__Betaproteobacteria;o__Nitrosomonadales;f__Nitrosomonadaceae;g__Nitrosospira;s__Nitrosospira sp003053905
ASV10797	0	0	0	0	0	0	4	0	0	0	0	0	0	0	0	0	169.03	0	0	0	0.001	33.806	15.045	0.125007	0.349364	d__Bacteria;p__Proteobacteria;c__Betaproteobacteria;o__Burkholderiales;f__Burkholderiaceae;g__Cupriavidus;s__Cupriavidus pauculus_B
ASV10798	0	4	0	0	0	0	0	0	0	0	0	180.35	0	0	0	0	0	0	0	0	36.07	0.001	-15.1385	0.125007	0.349364	d__Bacteria;p__Acidobacteria;c__Acidobacteriia;o__Acidobacteriales;f__Acidobacteriaceae
ASV10799	0	0	4	0	0	0	0	0	0	0	0	0	168.72	0	0	0	0	0	0	0	33.744	0.001	-15.0423	0.250007	0.441558	d__Bacteria;p__Proteobacteria;c__Deltaproteobacteria;o__Myxococcales;f__Kofleriaceae;g__Haliangium;s__Haliangium ochraceum
ASV108	0	0	0	0	26	47	0	0	0	0	0	0	0	0	1241.29	2607.34	0	0	0	0	248.258	521.468	1.07074	0.693836	0.765011	d__Bacteria;p__Proteobacteria;c__Alphaproteobacteria;o__Hyphomicrobiales;f__norank;g__Pseudorhodoplanes;s__Pseudorhodoplanes sinuspersici
ASV1080	0	0	0	0	0	0	0	0	17	0	0	0	0	0	0	0	0	0	788.1	0	0.001	157.62	17.2661	1.91098e-06	0.000112236	d__Bacteria;p__Proteobacteria;c__Alphaproteobacteria;o__Hyphomicrobiales;f__norank;g__Pseudorhodoplanes;s__Pseudorhodoplanes sinuspersici
ASV10800	0	0	0	0	4	0	0	0	0	0	0	0	0	0	190.97	0	0	0	0	0	38.194	0.001	-15.2211	0.00781469	0.0892477	d__Bacteria;p__Proteobacteria;c__Gammaproteobacteria;o__Xanthomonadales;f__Xanthomonadaceae;g__Luteimonas;s__Luteimonas abyssi
ASV10801	0	4	0	0	0	0	0	0	0	0	0	180.35	0	0	0	0	0	0	0	0	36.07	0.001	-15.1385	0.125007	0.349364	d__Bacteria;p__Actinobacteria;c__Actinomycetia;o__Micrococcales;f__Micrococcaceae;g__Paenarthrobacter;s__Paenarthrobacter nicotinovorans
ASV10802	0	0	0	4	0	0	0	0	0	0	0	0	0	185.37	0	0	0	0	0	0	37.074	0.001	-15.1781	0.0625063	0.332325	d__Bacteria;p__Planctomycetes;c__Planctomycetia;o__Gemmatales;f__Gemmataceae;g__Fimbriiglobus;s__Fimbriiglobus ruber
ASV10803	0	0	0	0	0	4	0	0	0	0	0	0	0	0	0	221.9	0	0	0	0	0.001	44.38	15.4376	0.0625063	0.332325	d__Bacteria;p__Verrucomicrobia;c__Opitutae;o__Opitutales;f__Opitutaceae;g__Lacunisphaera;s__uncultured bacterium
ASV10804	0	0	0	0	0	0	0	0	4	0	0	0	0	0	0	0	0	0	185.43	0	0.001	37.086	15.1786	0.0625063	0.332325	d__Bacteria;p__Proteobacteria;c__Deltaproteobacteria;o__Myxococcales;f__Archangiaceae;g__Archangium;s__Archangium gephyra
ASV10805	0	0	0	0	0	0	0	0	4	0	0	0	0	0	0	0	0	0	185.43	0	0.001	37.086	15.1786	0.0625063	0.332325	d__Bacteria;p__Chloroflexi;c__Thermomicrobia;o__Sphaerobacterales;f__Sphaerobacteraceae;g__Sphaerobacter;s__Sphaerobacter thermophilus
ASV10806	0	0	0	0	0	0	0	0	4	0	0	0	0	0	0	0	0	0	185.43	0	0.001	37.086	15.1786	0.0625063	0.332325	d__Bacteria;p__Proteobacteria;c__Deltaproteobacteria;o__Desulfuromonadales;f__Geobacteraceae;g__Geobacter;s__uncultured bacterium
ASV10807	0	0	0	0	0	0	4	0	0	0	0	0	0	0	0	0	169.03	0	0	0	0.001	33.806	15.045	0.125007	0.349364	d__Bacteria;p__candidate division NC10;c__norank;o__norank;f__norank;g__Candidatus Methylomirabilis;s__Methylomirabilis oxyfera
ASV10808	0	0	0	0	0	0	0	0	4	0	0	0	0	0	0	0	0	0	185.43	0	0.001	37.086	15.1786	0.0625063	0.332325	d__Bacteria;p__Actinobacteria;c__Rubrobacteria;o__Gaiellales;f__Gaiellaceae;g__Gaiella;s__Gaiella occulta
ASV10809	0	0	0	4	0	0	0	0	0	0	0	0	0	185.37	0	0	0	0	0	0	37.074	0.001	-15.1781	0.0625063	0.332325	d__Bacteria;p__Ignavibacteriae;c__Ignavibacteria;o__Ignavibacteriales;f__Ignavibacteriaceae;g__Ignavibacterium;s__uncultured bacterium
ASV1081	0	0	0	0	0	0	17	0	0	0	0	0	0	0	0	0	718.39	0	0	0	0.001	143.678	17.1325	7.64107e-06	0.000371087	d__Bacteria;p__Candidatus Dormibacteraeota;c__norank;o__norank;f__norank;g__Candidatus Dormibacter;s__Dormibacter sp003244185
ASV10810	0	0	0	0	0	0	0	0	4	0	0	0	0	0	0	0	0	0	185.43	0	0.001	37.086	15.1786	0.0625063	0.332325	d__Bacteria;p__Firmicutes;c__Clostridia;o__Eubacteriales;f__Lachnospiraceae;g__Niameybacter;s__Niameybacter massiliensis
ASV10811	0	0	0	0	0	0	0	0	4	0	0	0	0	0	0	0	0	0	185.43	0	0.001	37.086	15.1786	0.0625063	0.332325	d__Bacteria;p__Planctomycetes;c__Planctomycetia;o__Planctomycetales;f__Planctomycetaceae;g__Gimesia;s__Gimesia sp007748195
ASV10812	0	0	0	0	0	0	0	0	4	0	0	0	0	0	0	0	0	0	185.43	0	0.001	37.086	15.1786	0.0625063	0.332325	d__Bacteria;p__Acidobacteria;c__Vicinamibacteria;o__norank;f__Vicinamibacteraceae
ASV10813	0	0	4	0	0	0	0	0	0	0	0	0	168.72	0	0	0	0	0	0	0	33.744	0.001	-15.0423	0.250007	0.441558	d__Bacteria;p__Acidobacteria;c__Acidobacteriia;o__Acidobacteriales;f__Acidobacteriaceae;g__Candidatus Koribacter;s__uncultured bacterium
ASV10814	0	0	4	0	0	0	0	0	0	0	0	0	168.72	0	0	0	0	0	0	0	33.744	0.001	-15.0423	0.250007	0.441558	d__Bacteria;p__Acidobacteria;c__Acidobacteriia;o__Acidobacteriales;f__Acidobacteriaceae;g__Candidatus Koribacter;s__uncultured bacterium
ASV10815	0	0	0	0	0	4	0	0	0	0	0	0	0	0	0	221.9	0	0	0	0	0.001	44.38	15.4376	0.0625063	0.332325	d__Bacteria;p__Proteobacteria;c__Alphaproteobacteria;o__Rhodospirillales;f__Acetobacteraceae;g__Acidicaldus;s__uncultured bacterium
ASV10816	0	0	0	0	0	0	4	0	0	0	0	0	0	0	0	0	169.03	0	0	0	0.001	33.806	15.045	0.125007	0.349364	d__Bacteria;p__Bacteroidetes;c__Chitinophagia;o__Chitinophagales;f__Chitinophagaceae;g__Flavisolibacter;s__Flavisolibacter sp013327885
ASV10817	0	0	0	4	0	0	0	0	0	0	0	0	0	185.37	0	0	0	0	0	0	37.074	0.001	-15.1781	0.0625063	0.332325	d__Bacteria;p__Planctomycetes;c__Planctomycetia;o__Pirellulales;f__Pirellulaceae;g__Bremerella;s__Bremerella marina_B
ASV10818	0	0	0	0	0	0	0	0	4	0	0	0	0	0	0	0	0	0	185.43	0	0.001	37.086	15.1786	0.0625063	0.332325	d__Bacteria;p__Acidobacteria;c__Vicinamibacteria;o__norank;f__Vicinamibacteraceae;g__Luteitalea;s__Luteitalea pratensis
ASV10819	4	0	0	0	0	0	0	0	0	0	177.19	0	0	0	0	0	0	0	0	0	35.438	0.001	-15.113	0.125007	0.349364	d__Bacteria;p__Bacteroidetes;c__Chitinophagia;o__Chitinophagales;f__Chitinophagaceae;g__Flavipsychrobacter;s__Flavipsychrobacter stenotrophus
ASV1082	0	0	0	0	0	0	0	0	17	0	0	0	0	0	0	0	0	0	788.1	0	0.001	157.62	17.2661	1.91098e-06	0.000112236	Unclassified
ASV10820	4	0	0	0	0	0	0	0	0	0	177.19	0	0	0	0	0	0	0	0	0	35.438	0.001	-15.113	0.125007	0.349364	d__Bacteria;p__Proteobacteria;c__Betaproteobacteria;o__Burkholderiales;f__Oxalobacteraceae;g__Pseudoduganella;s__Pseudoduganella flava
ASV10821	0	0	0	4	0	0	0	0	0	0	0	0	0	185.37	0	0	0	0	0	0	37.074	0.001	-15.1781	0.0625063	0.332325	d__Bacteria;p__Chloroflexi;c__Ktedonobacteria;o__Ktedonobacterales;f__Ktedonobacteraceae;g__Ktedonobacter;s__Ktedonobacter racemifer
ASV10822	0	0	0	0	0	0	0	0	0	4	0	0	0	0	0	0	0	0	0	178.95	0.001	35.79	15.1273	0.250007	0.441558	d__Bacteria;p__Planctomycetes;c__Planctomycetia;o__Pirellulales;f__Pirellulaceae;g__Rhodopirellula
ASV10823	0	0	0	4	0	0	0	0	0	0	0	0	0	185.37	0	0	0	0	0	0	37.074	0.001	-15.1781	0.0625063	0.332325	d__Bacteria;p__Proteobacteria;c__Gammaproteobacteria;o__Xanthomonadales;f__Rhodanobacteraceae;g__Rhodanobacter;s__uncultured bacterium
ASV10824	0	0	0	0	0	0	4	0	0	0	0	0	0	0	0	0	169.03	0	0	0	0.001	33.806	15.045	0.125007	0.349364	d__Bacteria;p__Acidobacteria;c__Acidobacteriia;o__Acidobacteriales;f__Acidobacteriaceae;g__Candidatus Koribacter;s__uncultured bacterium
ASV10825	0	0	0	4	0	0	0	0	0	0	0	0	0	185.37	0	0	0	0	0	0	37.074	0.001	-15.1781	0.0625063	0.332325	d__Bacteria;p__Proteobacteria;c__Alphaproteobacteria;o__Hyphomicrobiales;f__Xanthobacteraceae;g__Pseudolabrys;s__uncultured bacterium
ASV10826	0	0	0	0	0	0	0	0	4	0	0	0	0	0	0	0	0	0	185.43	0	0.001	37.086	15.1786	0.0625063	0.332325	d__Bacteria;p__Planctomycetes;c__Planctomycetia;o__Gemmatales;f__Gemmataceae;g__Fimbriiglobus;s__Fimbriiglobus ruber
ASV10827	0	0	4	0	0	0	0	0	0	0	0	0	168.72	0	0	0	0	0	0	0	33.744	0.001	-15.0423	0.250007	0.441558	d__Bacteria;p__Proteobacteria;c__Alphaproteobacteria;o__Hyphomicrobiales;f__norank;g__Pseudorhodoplanes;s__Pseudorhodoplanes sinuspersici
ASV10828	0	0	0	0	0	0	0	0	4	0	0	0	0	0	0	0	0	0	185.43	0	0.001	37.086	15.1786	0.0625063	0.332325	d__Bacteria;p__Bacteroidetes;c__Chitinophagia;o__Chitinophagales;f__Chitinophagaceae;g__Terrimonas;s__Terrimonas ferruginea
ASV10829	0	4	0	0	0	0	0	0	0	0	0	180.35	0	0	0	0	0	0	0	0	36.07	0.001	-15.1385	0.125007	0.349364	d__Bacteria;p__Cyanobacteria;c__norank;o__Synechococcales;f__Prochlorotrichaceae;g__Nodosilinea;s__Nodosilinea sp003017855
ASV1083	0	0	17	0	0	0	0	0	0	0	0	0	717.06	0	0	0	0	0	0	0	143.412	0.001	-17.1298	0.0009771	0.0195951	d__Bacteria;p__Proteobacteria;c__Alphaproteobacteria;o__Rhodospirillales;f__Rhodospirillaceae;g__Hypericibacter;s__Hypericibacter adhaerens
ASV10830	0	0	0	4	0	0	0	0	0	0	0	0	0	185.37	0	0	0	0	0	0	37.074	0.001	-15.1781	0.0625063	0.332325	d__Bacteria;p__Acidobacteria;c__Acidobacteriia;o__Bryobacterales;f__Solibacteraceae;g__Candidatus Solibacter;s__Solibacter usitatus
ASV10831	0	4	0	0	0	0	0	0	0	0	0	180.35	0	0	0	0	0	0	0	0	36.07	0.001	-15.1385	0.125007	0.349364	d__Bacteria;p__Elusimicrobia;c__Endomicrobia;o__Endomicrobiales;f__Endomicrobiaceae;g__Endomicrobium;s__uncultured bacterium
ASV10832	4	0	0	0	0	0	0	0	0	0	177.19	0	0	0	0	0	0	0	0	0	35.438	0.001	-15.113	0.125007	0.349364	d__Bacteria;p__Verrucomicrobia;c__Spartobacteria;o__Chthoniobacterales;f__Chthoniobacteraceae;g__Chthoniobacter;s__Chthoniobacter flavus
ASV10833	0	0	0	0	0	0	0	0	0	4	0	0	0	0	0	0	0	0	0	178.95	0.001	35.79	15.1273	0.250007	0.441558	d__Bacteria;p__Actinobacteria;c__Rubrobacteria;o__Gaiellales;f__Gaiellaceae;g__Gaiella;s__Gaiella occulta
ASV10834	0	4	0	0	0	0	0	0	0	0	0	180.35	0	0	0	0	0	0	0	0	36.07	0.001	-15.1385	0.125007	0.349364	d__Bacteria;p__Acidobacteria;c__Acidobacteriia;o__Acidobacteriales;f__Acidobacteriaceae;g__Occallatibacter;s__uncultured bacterium
ASV10835	0	0	0	0	0	0	0	0	0	4	0	0	0	0	0	0	0	0	0	178.95	0.001	35.79	15.1273	0.250007	0.441558	d__Bacteria;p__Proteobacteria;c__Alphaproteobacteria;o__Hyphomicrobiales;f__Reyranellaceae;g__Reyranella;s__metagenome
ASV10836	0	0	4	0	0	0	0	0	0	0	0	0	168.72	0	0	0	0	0	0	0	33.744	0.001	-15.0423	0.250007	0.441558	d__Bacteria;p__Planctomycetes;c__Planctomycetia;o__Isosphaerales;f__Isosphaeraceae;g__Paludisphaera;s__Paludisphaera sp001610895
ASV10837	0	0	0	0	0	4	0	0	0	0	0	0	0	0	0	221.9	0	0	0	0	0.001	44.38	15.4376	0.0625063	0.332325	d__Bacteria;p__Proteobacteria;c__Betaproteobacteria;o__Burkholderiales;f__Oxalobacteraceae;g__Duganella;s__Duganella sp003217375
ASV10838	0	0	0	0	0	0	4	0	0	0	0	0	0	0	0	0	169.03	0	0	0	0.001	33.806	15.045	0.125007	0.349364	d__Bacteria;p__Actinobacteria;c__Actinomycetia;o__Propionibacteriales;f__Nocardioidaceae;g__Nocardioides;s__Nocardioides terrigena
ASV10839	0	0	4	0	0	0	0	0	0	0	0	0	168.72	0	0	0	0	0	0	0	33.744	0.001	-15.0423	0.250007	0.441558	d__Bacteria;p__Chloroflexi;c__Ktedonobacteria;o__Ktedonobacterales;f__Ktedonosporobacteraceae;g__Ktedonosporobacter;s__Ktedonosporobacter rubrisoli
ASV1084	0	0	17	0	0	0	0	0	0	0	0	0	717.06	0	0	0	0	0	0	0	143.412	0.001	-17.1298	0.0009771	0.0195951	d__Bacteria;p__Verrucomicrobia
ASV10840	0	0	0	0	4	0	0	0	0	0	0	0	0	0	190.97	0	0	0	0	0	38.194	0.001	-15.2211	0.00781469	0.0892477	d__Bacteria;p__Proteobacteria;c__Gammaproteobacteria;o__Legionellales;f__Coxiellaceae;g__Diplorickettsia
ASV10841	0	0	0	0	0	0	0	0	0	4	0	0	0	0	0	0	0	0	0	178.95	0.001	35.79	15.1273	0.250007	0.441558	d__Bacteria;p__Proteobacteria;c__Alphaproteobacteria;o__Hyphomicrobiales;f__Roseiarcaceae;g__Roseiarcus;s__uncultured bacterium
ASV10842	0	0	0	0	4	0	0	0	0	0	0	0	0	0	190.97	0	0	0	0	0	38.194	0.001	-15.2211	0.00781469	0.0892477	d__Bacteria;p__Bacteroidetes;c__Chitinophagia;o__Chitinophagales;f__Chitinophagaceae;g__Puia
ASV10843	0	0	0	0	0	4	0	0	0	0	0	0	0	0	0	221.9	0	0	0	0	0.001	44.38	15.4376	0.0625063	0.332325	d__Bacteria;p__Proteobacteria;c__Gammaproteobacteria;o__Xanthomonadales;f__Xanthomonadaceae;g__Lysobacter;s__Lysobacter gummosus
ASV10844	0	0	0	0	0	0	0	0	0	4	0	0	0	0	0	0	0	0	0	178.95	0.001	35.79	15.1273	0.250007	0.441558	d__Bacteria;p__Chloroflexi;c__norank;o__norank;f__norank;g__Thermobaculum;s__Thermobaculum terrenum
ASV10845	0	0	0	0	0	0	0	0	4	0	0	0	0	0	0	0	0	0	185.43	0	0.001	37.086	15.1786	0.0625063	0.332325	d__Bacteria;p__Proteobacteria;c__Deltaproteobacteria;o__Myxococcales;f__Kofleriaceae;g__Haliangium;s__Haliangium ochraceum
ASV10846	0	0	0	0	4	0	0	0	0	0	0	0	0	0	190.97	0	0	0	0	0	38.194	0.001	-15.2211	0.00781469	0.0892477	d__Bacteria;p__Proteobacteria;c__Alphaproteobacteria;o__Rhodospirillales;f__Rhodospirillaceae;g__Hypericibacter;s__Hypericibacter adhaerens
ASV10847	0	4	0	0	0	0	0	0	0	0	0	180.35	0	0	0	0	0	0	0	0	36.07	0.001	-15.1385	0.125007	0.349364	d__Bacteria;p__Proteobacteria;c__Betaproteobacteria;o__Burkholderiales;f__Comamonadaceae;g__Pelomonas
ASV10848	0	0	0	0	0	0	0	0	4	0	0	0	0	0	0	0	0	0	185.43	0	0.001	37.086	15.1786	0.0625063	0.332325	d__Bacteria;p__Firmicutes;c__Negativicutes;o__Selenomonadales;f__Sporomusaceae;g__Sporomusa;s__Sporomusa ovata
ASV10849	0	0	0	0	0	4	0	0	0	0	0	0	0	0	0	221.9	0	0	0	0	0.001	44.38	15.4376	0.0625063	0.332325	d__Bacteria;p__Acidobacteria;c__Acidobacteriia;o__Acidobacteriales;f__Acidobacteriaceae;g__Candidatus Koribacter;s__uncultured bacterium
ASV1085	0	0	0	17	0	0	0	0	0	0	0	0	0	787.84	0	0	0	0	0	0	157.568	0.001	-17.2656	7.64107e-06	0.000371087	d__Bacteria;p__Proteobacteria;c__Alphaproteobacteria;o__Rhodospirillales;f__Rhodospirillaceae;g__Hypericibacter;s__Hypericibacter adhaerens
ASV10850	0	4	0	0	0	0	0	0	0	0	0	180.35	0	0	0	0	0	0	0	0	36.07	0.001	-15.1385	0.125007	0.349364	d__Bacteria;p__Bacteroidetes;c__Sphingobacteriia;o__Sphingobacteriales;f__Sphingobacteriaceae;g__Mucilaginibacter
ASV10851	0	0	0	0	0	0	4	0	0	0	0	0	0	0	0	0	169.03	0	0	0	0.001	33.806	15.045	0.125007	0.349364	d__Bacteria;p__Acidobacteria;c__Acidobacteriia;o__Acidobacteriales;f__Acidobacteriaceae;g__Terracidiphilus;s__Terracidiphilus sp903849645
ASV10852	0	4	0	0	0	0	0	0	0	0	0	180.35	0	0	0	0	0	0	0	0	36.07	0.001	-15.1385	0.125007	0.349364	d__Bacteria;p__Acidobacteria;c__Acidobacteriia;o__Bryobacterales;f__Bryobacteraceae;g__Bryobacter;s__Bryobacter aggregatus
ASV10853	0	4	0	0	0	0	0	0	0	0	0	180.35	0	0	0	0	0	0	0	0	36.07	0.001	-15.1385	0.125007	0.349364	d__Bacteria;p__Planctomycetes;c__Planctomycetia;o__Pirellulales;f__Pirellulaceae;g__Rhodopirellula;s__uncultured bacterium
ASV10854	0	0	0	4	0	0	0	0	0	0	0	0	0	185.37	0	0	0	0	0	0	37.074	0.001	-15.1781	0.0625063	0.332325	d__Bacteria;p__Acidobacteria;c__Acidobacteriia;o__Bryobacterales;f__Solibacteraceae;g__Candidatus Solibacter;s__Solibacter usitatus
ASV10855	4	0	0	0	0	0	0	0	0	0	177.19	0	0	0	0	0	0	0	0	0	35.438	0.001	-15.113	0.125007	0.349364	Unclassified
ASV10856	0	4	0	0	0	0	0	0	0	0	0	180.35	0	0	0	0	0	0	0	0	36.07	0.001	-15.1385	0.125007	0.349364	d__Bacteria;p__Acidobacteria;c__Vicinamibacteria;o__norank;f__Vicinamibacteraceae;g__Luteitalea;s__Luteitalea pratensis
ASV10857	0	0	0	0	4	0	0	0	0	0	0	0	0	0	190.97	0	0	0	0	0	38.194	0.001	-15.2211	0.00781469	0.0892477	d__Bacteria;p__Proteobacteria;c__Alphaproteobacteria;o__Hyphomicrobiales;f__Bradyrhizobiaceae;g__Rhodopseudomonas;s__Rhodopseudomonas palustris
ASV10858	0	0	0	0	0	0	0	0	4	0	0	0	0	0	0	0	0	0	185.43	0	0.001	37.086	15.1786	0.0625063	0.332325	d__Bacteria;p__Firmicutes;c__Clostridia;o__Eubacteriales;f__Clostridiaceae;g__Desnuesiella;s__Desnuesiella massiliensis
ASV10859	4	0	0	0	0	0	0	0	0	0	177.19	0	0	0	0	0	0	0	0	0	35.438	0.001	-15.113	0.125007	0.349364	d__Bacteria;p__Acidobacteria;c__Acidobacteriia;o__Acidobacteriales;f__Acidobacteriaceae;g__Candidatus Koribacter;s__uncultured bacterium
ASV1086	0	0	17	0	0	0	0	0	0	0	0	0	717.06	0	0	0	0	0	0	0	143.412	0.001	-17.1298	0.0009771	0.0195951	d__Bacteria;p__Bacteroidetes;c__Chitinophagia;o__Chitinophagales;f__Chitinophagaceae;g__Puia;s__uncultured bacterium
ASV10860	0	4	0	0	0	0	0	0	0	0	0	180.35	0	0	0	0	0	0	0	0	36.07	0.001	-15.1385	0.125007	0.349364	d__Bacteria;p__Acidobacteria;c__Acidobacteriia;o__Bryobacterales;f__Solibacteraceae;g__Candidatus Solibacter;s__Solibacter usitatus
ASV10861	0	0	0	0	0	0	0	0	0	4	0	0	0	0	0	0	0	0	0	178.95	0.001	35.79	15.1273	0.250007	0.441558	d__Bacteria;p__Actinobacteria;c__Rubrobacteria;o__Gaiellales;f__Gaiellaceae;g__Gaiella;s__Gaiella occulta
ASV10862	0	0	4	0	0	0	0	0	0	0	0	0	168.72	0	0	0	0	0	0	0	33.744	0.001	-15.0423	0.250007	0.441558	d__Bacteria;p__Planctomycetes;c__Phycisphaerae;o__Sedimentisphaerales;f__Sedimentisphaeraceae;g__Limihaloglobus;s__Limihaloglobus sulfuriphilus
ASV10863	0	0	0	4	0	0	0	0	0	0	0	0	0	185.37	0	0	0	0	0	0	37.074	0.001	-15.1781	0.0625063	0.332325	d__Bacteria;p__Acidobacteria;c__Acidobacteriia;o__Acidobacteriales;f__Acidobacteriaceae;g__Candidatus Koribacter;s__uncultured bacterium
ASV10864	0	0	0	0	0	0	0	0	0	4	0	0	0	0	0	0	0	0	0	178.95	0.001	35.79	15.1273	0.250007	0.441558	d__Bacteria;p__Planctomycetes;c__Planctomycetia;o__Isosphaerales;f__Isosphaeraceae;g__Aquisphaera;s__Aquisphaera giovannonii
ASV10865	0	0	0	0	0	4	0	0	0	0	0	0	0	0	0	221.9	0	0	0	0	0.001	44.38	15.4376	0.0625063	0.332325	d__Bacteria;p__Planctomycetes;c__Planctomycetia;o__Pirellulales;f__Pirellulaceae;g__Rhodopirellula;s__uncultured planctomycete
ASV10866	0	0	0	0	4	0	0	0	0	0	0	0	0	0	190.97	0	0	0	0	0	38.194	0.001	-15.2211	0.00781469	0.0892477	d__Bacteria;p__Acidobacteria;c__Acidobacteriia;o__Acidobacteriales;f__Acidobacteriaceae
ASV10867	0	0	0	4	0	0	0	0	0	0	0	0	0	185.37	0	0	0	0	0	0	37.074	0.001	-15.1781	0.0625063	0.332325	d__Bacteria;p__Proteobacteria;c__Alphaproteobacteria;o__Micropepsales;f__Micropepsaceae;g__Rhizomicrobium;s__Rhizomicrobium palustre
ASV10868	4	0	0	0	0	0	0	0	0	0	177.19	0	0	0	0	0	0	0	0	0	35.438	0.001	-15.113	0.125007	0.349364	d__Bacteria;p__Acidobacteria;c__Acidobacteriia;o__Bryobacterales;f__Solibacteraceae;g__Candidatus Solibacter;s__Solibacter usitatus
ASV10869	0	0	0	0	0	0	0	0	0	4	0	0	0	0	0	0	0	0	0	178.95	0.001	35.79	15.1273	0.250007	0.441558	d__Bacteria;p__Planctomycetes;c__Planctomycetia;o__Isosphaerales;f__Isosphaeraceae;g__Paludisphaera;s__Paludisphaera borealis
ASV1087	0	0	0	0	0	0	0	17	0	0	0	0	0	0	0	0	0	3927	0	0	0.001	785.4	19.5831	0.0312547	0.205376	d__Bacteria;p__Proteobacteria;c__Alphaproteobacteria;o__Hyphomicrobiales;f__Methylocystaceae;g__Methylocystis;s__Methylocystis heyeri
ASV10870	0	4	0	0	0	0	0	0	0	0	0	180.35	0	0	0	0	0	0	0	0	36.07	0.001	-15.1385	0.125007	0.349364	d__Bacteria;p__Armatimonadetes;c__Armatimonadia;o__Capsulimonadales;f__Capsulimonadaceae;g__Capsulimonas;s__Capsulimonas corticalis
ASV10871	0	0	0	0	0	0	0	0	0	4	0	0	0	0	0	0	0	0	0	178.95	0.001	35.79	15.1273	0.250007	0.441558	d__Bacteria;p__Proteobacteria;c__Alphaproteobacteria;o__Hyphomicrobiales;f__Phreatobacteraceae;g__Phreatobacter;s__metagenome
ASV10872	0	0	0	0	0	0	0	0	0	4	0	0	0	0	0	0	0	0	0	178.95	0.001	35.79	15.1273	0.250007	0.441558	d__Bacteria;p__Proteobacteria;c__Gammaproteobacteria;o__Xanthomonadales;f__Rhodanobacteraceae;g__Dyella;s__Dyella japonica
ASV10873	0	0	0	0	4	0	0	0	0	0	0	0	0	0	190.97	0	0	0	0	0	38.194	0.001	-15.2211	0.00781469	0.0892477	d__Bacteria;p__Proteobacteria;c__Betaproteobacteria;o__Burkholderiales;f__Burkholderiaceae;g__Pandoraea;s__Pandoraea faecigallinarum
ASV10874	0	0	0	0	0	4	0	0	0	0	0	0	0	0	0	221.9	0	0	0	0	0.001	44.38	15.4376	0.0625063	0.332325	d__Bacteria;p__Proteobacteria;c__Alphaproteobacteria;o__Hyphomicrobiales;f__Xanthobacteraceae;g__Labrys;s__Labrys neptuniae
ASV10875	0	0	0	0	0	0	4	0	0	0	0	0	0	0	0	0	169.03	0	0	0	0.001	33.806	15.045	0.125007	0.349364	d__Bacteria;p__Candidatus Saccharibacteria;c__norank;o__norank;f__norank;g__Candidatus Saccharimonas;s__Saccharimonas aalborgensis
ASV10876	0	0	0	0	4	0	0	0	0	0	0	0	0	0	190.97	0	0	0	0	0	38.194	0.001	-15.2211	0.00781469	0.0892477	d__Bacteria;p__Proteobacteria;c__Gammaproteobacteria;o__Xanthomonadales;f__Rhodanobacteraceae;g__Rhodanobacter;s__uncultured bacterium
ASV10877	4	0	0	0	0	0	0	0	0	0	177.19	0	0	0	0	0	0	0	0	0	35.438	0.001	-15.113	0.125007	0.349364	d__Bacteria;p__Proteobacteria;c__Alphaproteobacteria;o__Sphingomonadales;f__Sphingomonadaceae;g__Sphingomonas;s__Sphingomonas koreensis
ASV10878	0	0	0	4	0	0	0	0	0	0	0	0	0	185.37	0	0	0	0	0	0	37.074	0.001	-15.1781	0.0625063	0.332325	d__Bacteria;p__Verrucomicrobia;c__Verrucomicrobiae;o__Verrucomicrobiales;f__Verrucomicrobia subdivision 3;g__Pedosphaera;s__metagenome
ASV10879	4	0	0	0	0	0	0	0	0	0	177.19	0	0	0	0	0	0	0	0	0	35.438	0.001	-15.113	0.125007	0.349364	d__Bacteria;p__Planctomycetes;c__Planctomycetia;o__Gemmatales;f__Gemmataceae;g__Fimbriiglobus;s__Fimbriiglobus ruber
ASV1088	0	0	0	0	0	0	0	0	0	17	0	0	0	0	0	0	0	0	0	760.52	0.001	152.104	17.2147	0.000244331	0.00670089	d__Bacteria;p__Proteobacteria;c__Betaproteobacteria;o__Neisseriales;f__Chromobacteriaceae;g__Aquitalea;s__Aquitalea sp005155025
ASV10880	0	0	4	0	0	0	0	0	0	0	0	0	168.72	0	0	0	0	0	0	0	33.744	0.001	-15.0423	0.250007	0.441558	d__Bacteria;p__Proteobacteria;c__Gammaproteobacteria;o__norank;f__norank;g__Acidibacter;s__uncultured bacterium
ASV10881	4	0	0	0	0	0	0	0	0	0	177.19	0	0	0	0	0	0	0	0	0	35.438	0.001	-15.113	0.125007	0.349364	d__Bacteria;p__Verrucomicrobia;c__Verrucomicrobiae;o__Verrucomicrobiales;f__Verrucomicrobia subdivision 3;g__Pedosphaera;s__uncultured bacterium
ASV10882	0	0	0	4	0	0	0	0	0	0	0	0	0	185.37	0	0	0	0	0	0	37.074	0.001	-15.1781	0.0625063	0.332325	d__Bacteria;p__Bacteroidetes;c__Flavobacteriia;o__Flavobacteriales;f__Flavobacteriaceae;g__Flavobacterium;s__Flavobacterium tructae
ASV10883	0	0	4	0	0	0	0	0	0	0	0	0	168.72	0	0	0	0	0	0	0	33.744	0.001	-15.0423	0.250007	0.441558	d__Bacteria;p__Acidobacteria;c__Acidobacteriia;o__Acidobacteriales;f__Acidobacteriaceae;g__Candidatus Koribacter
ASV10884	4	0	0	0	0	0	0	0	0	0	177.19	0	0	0	0	0	0	0	0	0	35.438	0.001	-15.113	0.125007	0.349364	d__Bacteria;p__Bacteroidetes;c__Sphingobacteriia;o__Sphingobacteriales;f__Sphingobacteriaceae;g__Mucilaginibacter;s__Mucilaginibacter sp004054195
ASV10885	0	4	0	0	0	0	0	0	0	0	0	180.35	0	0	0	0	0	0	0	0	36.07	0.001	-15.1385	0.125007	0.349364	d__Bacteria;p__Proteobacteria;c__Gammaproteobacteria;o__Xanthomonadales;f__Rhodanobacteraceae;g__Dokdonella;s__Dokdonella koreensis
ASV10886	4	0	0	0	0	0	0	0	0	0	177.19	0	0	0	0	0	0	0	0	0	35.438	0.001	-15.113	0.125007	0.349364	d__Bacteria;p__Acidobacteria;c__Acidobacteriia;o__Acidobacteriales;f__Acidobacteriaceae;g__Terriglobus;s__Terriglobus roseus_B
ASV10887	0	0	0	0	0	0	4	0	0	0	0	0	0	0	0	0	169.03	0	0	0	0.001	33.806	15.045	0.125007	0.349364	d__Bacteria;p__Proteobacteria;c__Betaproteobacteria;o__Burkholderiales;f__Burkholderiaceae;g__Cupriavidus;s__Cupriavidus malaysiensis
ASV10888	0	4	0	0	0	0	0	0	0	0	0	180.35	0	0	0	0	0	0	0	0	36.07	0.001	-15.1385	0.125007	0.349364	d__Bacteria;p__Acidobacteria;c__Acidobacteriia;o__Bryobacterales;f__Bryobacteraceae;g__Bryobacter;s__Bryobacter aggregatus
ASV10889	0	0	4	0	0	0	0	0	0	0	0	0	168.72	0	0	0	0	0	0	0	33.744	0.001	-15.0423	0.250007	0.441558	d__Bacteria;p__Actinobacteria;c__Actinomycetia;o__Corynebacteriales;f__Mycobacteriaceae;g__Mycobacterium
ASV1089	0	0	0	17	0	0	0	0	0	0	0	0	0	787.84	0	0	0	0	0	0	157.568	0.001	-17.2656	7.64107e-06	0.000371087	d__Bacteria;p__Chloroflexi;c__Ktedonobacteria;o__Thermogemmatisporales;f__Thermogemmatisporaceae;g__Thermogemmatispora;s__Thermogemmatispora aurantia
ASV10890	0	0	0	0	0	4	0	0	0	0	0	0	0	0	0	221.9	0	0	0	0	0.001	44.38	15.4376	0.0625063	0.332325	d__Bacteria;p__Candidatus Peregrinibacteria;c__Candidatus Peribacteria;o__Candidatus Peribacterales;f__norank;g__Candidatus Peribacter;s__Peribacter riflensis
ASV10891	0	0	0	0	0	0	0	0	4	0	0	0	0	0	0	0	0	0	185.43	0	0.001	37.086	15.1786	0.0625063	0.332325	d__Bacteria;p__Verrucomicrobia;c__Spartobacteria;o__Chthoniobacterales;f__Chthoniobacteraceae;g__Chthoniobacter;s__Chthoniobacter flavus
ASV10892	0	0	0	0	0	4	0	0	0	0	0	0	0	0	0	221.9	0	0	0	0	0.001	44.38	15.4376	0.0625063	0.332325	d__Bacteria;p__Bacteroidetes;c__Cytophagia;o__Cytophagales;f__Fulvivirgaceae;g__Chryseolinea;s__Chryseolinea soli
ASV10893	0	0	0	0	0	0	0	0	4	0	0	0	0	0	0	0	0	0	185.43	0	0.001	37.086	15.1786	0.0625063	0.332325	d__Bacteria;p__Firmicutes;c__Clostridia;o__Eubacteriales;f__Clostridiaceae;g__Desnuesiella;s__Desnuesiella massiliensis
ASV10894	4	0	0	0	0	0	0	0	0	0	177.19	0	0	0	0	0	0	0	0	0	35.438	0.001	-15.113	0.125007	0.349364	d__Bacteria;p__Bacteroidetes;c__Cytophagia;o__Cytophagales;f__Fulvivirgaceae;g__Chryseolinea;s__Chryseolinea soli
ASV10895	0	0	0	0	0	0	0	0	4	0	0	0	0	0	0	0	0	0	185.43	0	0.001	37.086	15.1786	0.0625063	0.332325	d__Bacteria;p__Acidobacteria;c__Acidobacteriia;o__Acidobacteriales;f__Acidobacteriaceae;g__Candidatus Koribacter;s__uncultured bacterium
ASV10896	0	0	0	0	4	0	0	0	0	0	0	0	0	0	190.97	0	0	0	0	0	38.194	0.001	-15.2211	0.00781469	0.0892477	d__Bacteria;p__Verrucomicrobia;c__Spartobacteria;o__Chthoniobacterales;f__Chthoniobacteraceae;g__Chthoniobacter;s__Chthoniobacter flavus
ASV10897	0	4	0	0	0	0	0	0	0	0	0	180.35	0	0	0	0	0	0	0	0	36.07	0.001	-15.1385	0.125007	0.349364	d__Bacteria;p__Bacteroidetes;c__Sphingobacteriia;o__Sphingobacteriales;f__Sphingobacteriaceae;g__Mucilaginibacter;s__Mucilaginibacter gotjawali
ASV10898	0	0	4	0	0	0	0	0	0	0	0	0	168.72	0	0	0	0	0	0	0	33.744	0.001	-15.0423	0.250007	0.441558	Unclassified
ASV10899	0	4	0	0	0	0	0	0	0	0	0	180.35	0	0	0	0	0	0	0	0	36.07	0.001	-15.1385	0.125007	0.349364	d__Bacteria;p__Planctomycetes;c__Phycisphaerae;o__Sedimentisphaerales;f__Anaerohalosphaeraceae;g__Anaerohalosphaera;s__Anaerohalosphaera lusitana
ASV109	0	0	0	0	0	0	0	0	0	72	0	0	0	0	0	0	0	0	0	3221.04	0.001	644.208	19.2972	5.63412e-17	1.96474e-14	d__Bacteria;p__Proteobacteria;c__Alphaproteobacteria;o__Hyphomicrobiales;f__Bradyrhizobiaceae;g__Bradyrhizobium;s__Bradyrhizobium sp011516665
ASV1090	0	0	0	0	0	0	17	0	0	0	0	0	0	0	0	0	718.39	0	0	0	0.001	143.678	17.1325	7.64107e-06	0.000371087	d__Bacteria;p__Bacteroidetes;c__Chitinophagia;o__Chitinophagales;f__Chitinophagaceae;g__Puia
ASV10900	0	4	0	0	0	0	0	0	0	0	0	180.35	0	0	0	0	0	0	0	0	36.07	0.001	-15.1385	0.125007	0.349364	d__Bacteria;p__Proteobacteria;c__Alphaproteobacteria;o__Sphingomonadales;f__Sphingomonadaceae;g__Allosphingosinicella;s__Allosphingosinicella sp013816585
ASV10901	0	0	0	4	0	0	0	0	0	0	0	0	0	185.37	0	0	0	0	0	0	37.074	0.001	-15.1781	0.0625063	0.332325	d__Bacteria;p__Planctomycetes;c__Planctomycetia;o__Gemmatales;f__Gemmataceae;g__Fimbriiglobus;s__Fimbriiglobus ruber
ASV10902	0	4	0	0	0	0	0	0	0	0	0	180.35	0	0	0	0	0	0	0	0	36.07	0.001	-15.1385	0.125007	0.349364	d__Bacteria;p__Actinobacteria;c__Actinomycetia;o__Micromonosporales;f__Micromonosporaceae;g__Actinoplanes;s__Actinoplanes teichomyceticus
ASV10903	0	4	0	0	0	0	0	0	0	0	0	180.35	0	0	0	0	0	0	0	0	36.07	0.001	-15.1385	0.125007	0.349364	d__Bacteria;p__Acidobacteria;c__Acidobacteriia;o__Acidobacteriales;f__Acidobacteriaceae;g__Candidatus Koribacter;s__uncultured bacterium
ASV10904	0	0	4	0	0	0	0	0	0	0	0	0	168.72	0	0	0	0	0	0	0	33.744	0.001	-15.0423	0.250007	0.441558	d__Bacteria;p__Bacteroidetes;c__Sphingobacteriia;o__Sphingobacteriales;f__Sphingobacteriaceae;g__Mucilaginibacter
ASV10905	0	0	0	0	0	0	0	0	4	0	0	0	0	0	0	0	0	0	185.43	0	0.001	37.086	15.1786	0.0625063	0.332325	d__Bacteria;p__Cyanobacteria;c__norank;o__Synechococcales;f__Prochlorotrichaceae;g__Nodosilinea;s__Nodosilinea sp003017855
ASV10906	0	0	0	4	0	0	0	0	0	0	0	0	0	185.37	0	0	0	0	0	0	37.074	0.001	-15.1781	0.0625063	0.332325	d__Bacteria;p__Acidobacteria;c__Acidobacteriia;o__Acidobacteriales;f__Acidobacteriaceae;g__Occallatibacter
ASV10907	0	0	0	0	4	0	0	0	0	0	0	0	0	0	190.97	0	0	0	0	0	38.194	0.001	-15.2211	0.00781469	0.0892477	d__Bacteria;p__Chloroflexi;c__norank;o__norank;f__norank;g__Thermobaculum;s__Thermobaculum terrenum
ASV10908	0	0	4	0	0	0	0	0	0	0	0	0	168.72	0	0	0	0	0	0	0	33.744	0.001	-15.0423	0.250007	0.441558	d__Bacteria;p__Armatimonadetes;c__Armatimonadia;o__Capsulimonadales;f__Capsulimonadaceae;g__Capsulimonas;s__Capsulimonas corticalis
ASV10909	4	0	0	0	0	0	0	0	0	0	177.19	0	0	0	0	0	0	0	0	0	35.438	0.001	-15.113	0.125007	0.349364	d__Bacteria;p__Planctomycetes;c__Phycisphaerae;o__Tepidisphaerales;f__Tepidisphaeraceae;g__Tepidisphaera;s__Tepidisphaera mucosa
ASV1091	0	0	17	0	0	0	0	0	0	0	0	0	717.06	0	0	0	0	0	0	0	143.412	0.001	-17.1298	0.0009771	0.0195951	d__Bacteria;p__Acidobacteria;c__Vicinamibacteria;o__norank;f__Vicinamibacteraceae;g__Vicinamibacter
ASV10910	0	0	4	0	0	0	0	0	0	0	0	0	168.72	0	0	0	0	0	0	0	33.744	0.001	-15.0423	0.250007	0.441558	d__Bacteria;p__Proteobacteria;c__Gammaproteobacteria;o__norank;f__norank;g__Acidibacter;s__uncultured bacterium
ASV10911	4	0	0	0	0	0	0	0	0	0	177.19	0	0	0	0	0	0	0	0	0	35.438	0.001	-15.113	0.125007	0.349364	d__Bacteria;p__Acidobacteria;c__Acidobacteriia;o__Acidobacteriales;f__Acidobacteriaceae;g__Candidatus Koribacter;s__uncultured bacterium
ASV10912	0	0	0	0	4	0	0	0	0	0	0	0	0	0	190.97	0	0	0	0	0	38.194	0.001	-15.2211	0.00781469	0.0892477	d__Bacteria;p__Proteobacteria;c__Alphaproteobacteria;o__Hyphomicrobiales;f__Hyphomicrobiaceae;g__Methyloceanibacter;s__uncultured bacterium
ASV10913	0	0	0	0	0	0	0	0	0	4	0	0	0	0	0	0	0	0	0	178.95	0.001	35.79	15.1273	0.250007	0.441558	Unclassified
ASV10914	0	0	0	4	0	0	0	0	0	0	0	0	0	185.37	0	0	0	0	0	0	37.074	0.001	-15.1781	0.0625063	0.332325	d__Bacteria;p__Bacteroidetes;c__Cytophagia;o__Cytophagales;f__Fulvivirgaceae;g__Ohtaekwangia;s__Ohtaekwangia koreensis
ASV10915	0	4	0	0	0	0	0	0	0	0	0	180.35	0	0	0	0	0	0	0	0	36.07	0.001	-15.1385	0.125007	0.349364	d__Bacteria;p__Planctomycetes;c__Planctomycetia;o__Isosphaerales;f__Isosphaeraceae;g__Singulisphaera;s__Singulisphaera sp900129635
ASV10916	0	4	0	0	0	0	0	0	0	0	0	180.35	0	0	0	0	0	0	0	0	36.07	0.001	-15.1385	0.125007	0.349364	d__Bacteria;p__Verrucomicrobia;c__Spartobacteria;o__Chthoniobacterales;f__Chthoniobacteraceae;g__Chthoniobacter;s__Chthoniobacter flavus
ASV10917	0	0	0	0	0	0	0	0	4	0	0	0	0	0	0	0	0	0	185.43	0	0.001	37.086	15.1786	0.0625063	0.332325	d__Bacteria;p__Acidobacteria;c__Acidobacteriia;o__Acidobacteriales;f__Acidobacteriaceae;g__Candidatus Koribacter;s__uncultured bacterium
ASV10918	0	0	0	0	0	0	4	0	0	0	0	0	0	0	0	0	169.03	0	0	0	0.001	33.806	15.045	0.125007	0.349364	d__Bacteria;p__Proteobacteria;c__Alphaproteobacteria;o__Caulobacterales;f__Caulobacteraceae;g__Caulobacter;s__Caulobacter henricii_A
ASV10919	0	0	0	0	0	0	0	0	4	0	0	0	0	0	0	0	0	0	185.43	0	0.001	37.086	15.1786	0.0625063	0.332325	d__Bacteria;p__Proteobacteria;c__Betaproteobacteria;o__Nitrosomonadales
ASV1092	0	0	0	0	0	0	0	0	17	0	0	0	0	0	0	0	0	0	788.1	0	0.001	157.62	17.2661	1.91098e-06	0.000112236	d__Bacteria;p__Proteobacteria;c__Betaproteobacteria;o__Burkholderiales;f__Burkholderiaceae;g__Cupriavidus;s__Cupriavidus alkaliphilus
ASV10920	0	4	0	0	0	0	0	0	0	0	0	180.35	0	0	0	0	0	0	0	0	36.07	0.001	-15.1385	0.125007	0.349364	d__Bacteria;p__Chloroflexi;c__norank;o__norank;f__norank;g__Thermobaculum;s__Thermobaculum terrenum
ASV10921	0	0	0	4	0	0	0	0	0	0	0	0	0	185.37	0	0	0	0	0	0	37.074	0.001	-15.1781	0.0625063	0.332325	d__Bacteria;p__Planctomycetes;c__Planctomycetia;o__Gemmatales;f__Gemmataceae;g__Fimbriiglobus;s__Fimbriiglobus ruber
ASV10922	4	0	0	0	0	0	0	0	0	0	177.19	0	0	0	0	0	0	0	0	0	35.438	0.001	-15.113	0.125007	0.349364	d__Bacteria;p__Proteobacteria;c__Gammaproteobacteria;o__Xanthomonadales;f__Rhodanobacteraceae;g__Rhodanobacter;s__uncultured bacterium
ASV10923	0	4	0	0	0	0	0	0	0	0	0	180.35	0	0	0	0	0	0	0	0	36.07	0.001	-15.1385	0.125007	0.349364	d__Bacteria;p__Actinobacteria;c__Actinomycetia;o__Corynebacteriales;f__Mycobacteriaceae;g__Mycobacterium;s__Mycobacterium cookii
ASV10924	0	0	0	4	0	0	0	0	0	0	0	0	0	185.37	0	0	0	0	0	0	37.074	0.001	-15.1781	0.0625063	0.332325	d__Bacteria;p__Proteobacteria;c__Betaproteobacteria;o__Nitrosomonadales;f__Sterolibacteriaceae;g__Sterolibacterium
ASV10925	0	4	0	0	0	0	0	0	0	0	0	180.35	0	0	0	0	0	0	0	0	36.07	0.001	-15.1385	0.125007	0.349364	d__Bacteria;p__Proteobacteria;c__Alphaproteobacteria;o__Hyphomicrobiales;f__Roseiarcaceae;g__Roseiarcus;s__uncultured bacterium
ASV10926	0	0	0	0	4	0	0	0	0	0	0	0	0	0	190.97	0	0	0	0	0	38.194	0.001	-15.2211	0.00781469	0.0892477	d__Bacteria;p__Actinobacteria;c__Actinomycetia;o__Corynebacteriales;f__Corynebacteriaceae;g__Corynebacterium;s__Corynebacterium kroppenstedtii_B
ASV10927	0	0	0	4	0	0	0	0	0	0	0	0	0	185.37	0	0	0	0	0	0	37.074	0.001	-15.1781	0.0625063	0.332325	d__Bacteria;p__Proteobacteria;c__Gammaproteobacteria;o__Xanthomonadales;f__Rhodanobacteraceae;g__Aquimonas;s__Aquimonas voraii
ASV10928	4	0	0	0	0	0	0	0	0	0	177.19	0	0	0	0	0	0	0	0	0	35.438	0.001	-15.113	0.125007	0.349364	d__Bacteria;p__Bacteroidetes;c__Cytophagia;o__Cytophagales;f__Fulvivirgaceae;g__Ohtaekwangia;s__Ohtaekwangia koreensis
ASV10929	0	0	0	0	0	0	4	0	0	0	0	0	0	0	0	0	169.03	0	0	0	0.001	33.806	15.045	0.125007	0.349364	d__Bacteria;p__Verrucomicrobia;c__Spartobacteria;o__Chthoniobacterales;f__Chthoniobacteraceae;g__Chthoniobacter;s__Chthoniobacter flavus
ASV1093	0	0	0	0	0	0	0	0	0	17	0	0	0	0	0	0	0	0	0	760.52	0.001	152.104	17.2147	0.000244331	0.00670089	d__Bacteria;p__Bacteroidetes;c__Chitinophagia;o__Chitinophagales;f__Chitinophagaceae;g__Flaviaesturariibacter;s__Flaviaesturariibacter sp004337505
ASV10930	0	0	0	0	0	4	0	0	0	0	0	0	0	0	0	221.9	0	0	0	0	0.001	44.38	15.4376	0.0625063	0.332325	d__Bacteria;p__Proteobacteria;c__Oligoflexia;o__Oligoflexales;f__Oligoflexaceae;g__Oligoflexus;s__Oligoflexus tunisiensis
ASV10931	0	0	0	0	0	0	0	0	4	0	0	0	0	0	0	0	0	0	185.43	0	0.001	37.086	15.1786	0.0625063	0.332325	d__Bacteria;p__Proteobacteria;c__Alphaproteobacteria;o__Rhodospirillales;f__Azospirillaceae;g__Azospirillum;s__Azospirillum brasilense_B
ASV10932	0	0	0	0	0	0	0	0	4	0	0	0	0	0	0	0	0	0	185.43	0	0.001	37.086	15.1786	0.0625063	0.332325	d__Bacteria;p__Planctomycetes;c__Phycisphaerae;o__Phycisphaerales;f__Phycisphaeraceae;g__Phycisphaera;s__Phycisphaera mikurensis
ASV10933	0	0	0	0	4	0	0	0	0	0	0	0	0	0	190.97	0	0	0	0	0	38.194	0.001	-15.2211	0.00781469	0.0892477	d__Bacteria;p__Proteobacteria;c__Betaproteobacteria;o__Burkholderiales;f__Burkholderiaceae;g__Paraburkholderia;s__Paraburkholderia terricola
ASV10934	0	0	0	0	0	0	4	0	0	0	0	0	0	0	0	0	169.03	0	0	0	0.001	33.806	15.045	0.125007	0.349364	d__Bacteria;p__Chloroflexi;c__Thermomicrobia;o__Sphaerobacterales;f__Sphaerobacteraceae;g__Sphaerobacter;s__Sphaerobacter thermophilus
ASV10935	0	0	4	0	0	0	0	0	0	0	0	0	168.72	0	0	0	0	0	0	0	33.744	0.001	-15.0423	0.250007	0.441558	d__Bacteria;p__Acidobacteria;c__Acidobacteriia;o__Acidobacteriales;f__Acidobacteriaceae;g__Candidatus Sulfotelmatobacter;s__Sulfotelmatobacter sp003166855
ASV10936	0	0	0	0	0	0	0	0	4	0	0	0	0	0	0	0	0	0	185.43	0	0.001	37.086	15.1786	0.0625063	0.332325	d__Bacteria;p__Proteobacteria;c__Alphaproteobacteria;o__Hyphomicrobiales;f__Bradyrhizobiaceae;g__Bradyrhizobium;s__Bradyrhizobium sp011516635
ASV10937	4	0	0	0	0	0	0	0	0	0	177.19	0	0	0	0	0	0	0	0	0	35.438	0.001	-15.113	0.125007	0.349364	d__Bacteria;p__Proteobacteria;c__Alphaproteobacteria;o__Hyphomicrobiales;f__Methylocystaceae;g__Methylocystis;s__Methylocystis heyeri
ASV10938	4	0	0	0	0	0	0	0	0	0	177.19	0	0	0	0	0	0	0	0	0	35.438	0.001	-15.113	0.125007	0.349364	d__Bacteria;p__Candidatus Melainabacteria;c__norank;o__Candidatus Obscuribacterales;f__norank;g__Candidatus Obscuribacter;s__Obscuribacter phosphatis
ASV10939	0	0	0	4	0	0	0	0	0	0	0	0	0	185.37	0	0	0	0	0	0	37.074	0.001	-15.1781	0.0625063	0.332325	d__Bacteria;p__Proteobacteria;c__Alphaproteobacteria
ASV1094	0	0	0	0	0	0	0	0	0	17	0	0	0	0	0	0	0	0	0	760.52	0.001	152.104	17.2147	0.000244331	0.00670089	d__Bacteria;p__Bacteroidetes;c__Chitinophagia;o__Chitinophagales;f__Chitinophagaceae;g__Puia
ASV10940	0	0	0	4	0	0	0	0	0	0	0	0	0	185.37	0	0	0	0	0	0	37.074	0.001	-15.1781	0.0625063	0.332325	d__Bacteria;p__Planctomycetes;c__Planctomycetia;o__Gemmatales;f__Gemmataceae;g__Gemmata;s__Gemmata massiliana
ASV10941	0	0	0	0	0	0	4	0	0	0	0	0	0	0	0	0	169.03	0	0	0	0.001	33.806	15.045	0.125007	0.349364	d__Bacteria;p__Actinobacteria;c__Acidimicrobiia;o__Acidimicrobiales;f__Acidimicrobiaceae;g__Acidimicrobium;s__Acidimicrobium ferrooxidans
ASV10942	0	0	4	0	0	0	0	0	0	0	0	0	168.72	0	0	0	0	0	0	0	33.744	0.001	-15.0423	0.250007	0.441558	d__Bacteria;p__Verrucomicrobia;c__Verrucomicrobiae;o__Verrucomicrobiales;f__Verrucomicrobia subdivision 3;g__Pedosphaera;s__uncultured bacterium
ASV10943	4	0	0	0	0	0	0	0	0	0	177.19	0	0	0	0	0	0	0	0	0	35.438	0.001	-15.113	0.125007	0.349364	d__Bacteria;p__Proteobacteria;c__Alphaproteobacteria;o__Hyphomicrobiales;f__Bradyrhizobiaceae;g__Bradyrhizobium
ASV10944	0	0	0	4	0	0	0	0	0	0	0	0	0	185.37	0	0	0	0	0	0	37.074	0.001	-15.1781	0.0625063	0.332325	d__Bacteria;p__Verrucomicrobia;c__Verrucomicrobiae;o__Verrucomicrobiales;f__Verrucomicrobia subdivision 3;g__Pedosphaera;s__uncultured bacterium
ASV10945	0	4	0	0	0	0	0	0	0	0	0	180.35	0	0	0	0	0	0	0	0	36.07	0.001	-15.1385	0.125007	0.349364	d__Bacteria;p__Proteobacteria;c__Gammaproteobacteria;o__Xanthomonadales;f__Rhodanobacteraceae;g__Rhodanobacter;s__uncultured bacterium
ASV10946	0	0	0	0	4	0	0	0	0	0	0	0	0	0	190.97	0	0	0	0	0	38.194	0.001	-15.2211	0.00781469	0.0892477	Unclassified
ASV10947	4	0	0	0	0	0	0	0	0	0	177.19	0	0	0	0	0	0	0	0	0	35.438	0.001	-15.113	0.125007	0.349364	d__Bacteria;p__Proteobacteria;c__Alphaproteobacteria;o__Sphingomonadales;f__Sphingomonadaceae;g__Sphingomonas;s__Sphingomonas sp.
ASV10948	4	0	0	0	0	0	0	0	0	0	177.19	0	0	0	0	0	0	0	0	0	35.438	0.001	-15.113	0.125007	0.349364	d__Bacteria;p__Bacteroidetes;c__Sphingobacteriia;o__Sphingobacteriales;f__Sphingobacteriaceae;g__Mucilaginibacter;s__Mucilaginibacter gossypii
ASV10949	0	0	0	0	0	0	0	0	0	4	0	0	0	0	0	0	0	0	0	178.95	0.001	35.79	15.1273	0.250007	0.441558	d__Bacteria;p__Verrucomicrobia;c__Verrucomicrobiae;o__Verrucomicrobiales;f__Verrucomicrobia subdivision 3;g__Pedosphaera;s__uncultured bacterium
ASV1095	0	17	0	0	0	0	0	0	0	0	0	766.49	0	0	0	0	0	0	0	0	153.298	0.001	-17.226	7.64107e-06	0.000371087	d__Bacteria;p__Proteobacteria;c__Alphaproteobacteria;o__Hyphomicrobiales;f__Hyphomicrobiaceae;g__Methyloceanibacter;s__uncultured bacterium
ASV10950	0	0	4	0	0	0	0	0	0	0	0	0	168.72	0	0	0	0	0	0	0	33.744	0.001	-15.0423	0.250007	0.441558	d__Bacteria;p__Acidobacteria;c__Acidobacteriia;o__Acidobacteriales;f__Acidobacteriaceae;g__Candidatus Koribacter;s__Koribacter versatilis
ASV10951	4	0	0	0	0	0	0	0	0	0	177.19	0	0	0	0	0	0	0	0	0	35.438	0.001	-15.113	0.125007	0.349364	d__Bacteria;p__Proteobacteria;c__Gammaproteobacteria;o__Pseudomonadales;f__Moraxellaceae;g__Acinetobacter;s__Acinetobacter sp003711395
ASV10952	0	4	0	0	0	0	0	0	0	0	0	180.35	0	0	0	0	0	0	0	0	36.07	0.001	-15.1385	0.125007	0.349364	d__Bacteria;p__Elusimicrobia;c__Endomicrobia;o__Endomicrobiales;f__Endomicrobiaceae;g__Endomicrobium;s__Endomicrobium proavitum
ASV10953	0	4	0	0	0	0	0	0	0	0	0	180.35	0	0	0	0	0	0	0	0	36.07	0.001	-15.1385	0.125007	0.349364	d__Bacteria;p__Acidobacteria;c__Acidobacteriia;o__Acidobacteriales;f__Acidobacteriaceae;g__Terracidiphilus;s__Terracidiphilus sp903849645
ASV10954	0	0	0	0	0	0	4	0	0	0	0	0	0	0	0	0	169.03	0	0	0	0.001	33.806	15.045	0.125007	0.349364	d__Bacteria;p__Bacteroidetes;c__Chitinophagia;o__Chitinophagales;f__Chitinophagaceae;g__Chitinophaga;s__Chitinophaga polysaccharea_A
ASV10955	0	0	0	0	0	4	0	0	0	0	0	0	0	0	0	221.9	0	0	0	0	0.001	44.38	15.4376	0.0625063	0.332325	d__Bacteria;p__Planctomycetes;c__Planctomycetia;o__Pirellulales;f__Pirellulaceae
ASV10956	0	0	0	0	0	0	4	0	0	0	0	0	0	0	0	0	169.03	0	0	0	0.001	33.806	15.045	0.125007	0.349364	d__Bacteria;p__Proteobacteria;c__Betaproteobacteria;o__Rhodocyclales;f__Rhodocyclaceae;g__Rhodocyclus;s__Rhodocyclus tenuis
ASV10957	0	0	0	0	0	0	4	0	0	0	0	0	0	0	0	0	169.03	0	0	0	0.001	33.806	15.045	0.125007	0.349364	d__Bacteria;p__Acidobacteria;c__Vicinamibacteria;o__norank;f__Vicinamibacteraceae;g__Luteitalea;s__Luteitalea pratensis
ASV10958	0	0	0	0	4	0	0	0	0	0	0	0	0	0	190.97	0	0	0	0	0	38.194	0.001	-15.2211	0.00781469	0.0892477	d__Bacteria;p__Acidobacteria;c__Acidobacteriia;o__Acidobacteriales;f__Acidobacteriaceae;g__Silvibacterium;s__Silvibacterium bohemicum
ASV10959	0	0	0	0	0	0	4	0	0	0	0	0	0	0	0	0	169.03	0	0	0	0.001	33.806	15.045	0.125007	0.349364	d__Bacteria;p__Acidobacteria;c__Vicinamibacteria;o__norank;f__Vicinamibacteraceae;g__Luteitalea;s__Luteitalea pratensis
ASV1096	17	0	0	0	0	0	0	0	0	0	753.05	0	0	0	0	0	0	0	0	0	150.61	0.001	-17.2005	0.000122181	0.00397117	d__Bacteria;p__Bacteroidetes;c__Chitinophagia;o__Chitinophagales;f__Chitinophagaceae;g__Paraflavitalea;s__Paraflavitalea soli
ASV10960	0	0	0	0	4	0	0	0	0	0	0	0	0	0	190.97	0	0	0	0	0	38.194	0.001	-15.2211	0.00781469	0.0892477	d__Bacteria;p__Proteobacteria;c__Gammaproteobacteria;o__Xanthomonadales;f__Rhodanobacteraceae
ASV10961	0	0	0	4	0	0	0	0	0	0	0	0	0	185.37	0	0	0	0	0	0	37.074	0.001	-15.1781	0.0625063	0.332325	d__Bacteria;p__Proteobacteria;c__Betaproteobacteria;o__Burkholderiales;f__Comamonadaceae;g__Variovorax;s__Variovorax boronicumulans
ASV10962	0	0	0	0	0	0	0	0	4	0	0	0	0	0	0	0	0	0	185.43	0	0.001	37.086	15.1786	0.0625063	0.332325	d__Bacteria;p__Planctomycetes;c__Planctomycetia;o__Isosphaerales;f__Isosphaeraceae;g__Aquisphaera;s__Aquisphaera giovannonii
ASV10963	0	0	0	0	0	0	4	0	0	0	0	0	0	0	0	0	169.03	0	0	0	0.001	33.806	15.045	0.125007	0.349364	d__Bacteria;p__Acidobacteria;c__Vicinamibacteria;o__norank;f__Vicinamibacteraceae;g__Luteitalea;s__Luteitalea pratensis
ASV10964	0	0	0	0	0	4	0	0	0	0	0	0	0	0	0	221.9	0	0	0	0	0.001	44.38	15.4376	0.0625063	0.332325	d__Bacteria;p__Verrucomicrobia;c__Spartobacteria;o__Chthoniobacterales;f__Chthoniobacteraceae;g__Candidatus Udaeobacter;s__Udaeobacter sp003218615
ASV10965	0	0	0	0	4	0	0	0	0	0	0	0	0	0	190.97	0	0	0	0	0	38.194	0.001	-15.2211	0.00781469	0.0892477	d__Bacteria;p__Cyanobacteria;c__norank;o__Nostocales;f__Tolypothrichaceae;g__Hassalia
ASV10966	0	0	4	0	0	0	0	0	0	0	0	0	168.72	0	0	0	0	0	0	0	33.744	0.001	-15.0423	0.250007	0.441558	d__Bacteria;p__Proteobacteria;c__Alphaproteobacteria;o__Rhodospirillales;f__Acetobacteraceae;g__Endobacter;s__Endobacter medicaginis
ASV10967	0	0	0	0	0	4	0	0	0	0	0	0	0	0	0	221.9	0	0	0	0	0.001	44.38	15.4376	0.0625063	0.332325	d__Bacteria;p__Proteobacteria;c__Betaproteobacteria;o__Burkholderiales;f__Oxalobacteraceae;g__Herminiimonas;s__Herminiimonas sp000013625
ASV10968	0	0	0	0	0	0	0	0	4	0	0	0	0	0	0	0	0	0	185.43	0	0.001	37.086	15.1786	0.0625063	0.332325	d__Bacteria;p__Bacteroidetes;c__Chitinophagia;o__Chitinophagales;f__Chitinophagaceae
ASV10969	0	0	0	0	0	4	0	0	0	0	0	0	0	0	0	221.9	0	0	0	0	0.001	44.38	15.4376	0.0625063	0.332325	d__Bacteria;p__Acidobacteria;c__Acidobacteriia;o__Acidobacteriales;f__Acidobacteriaceae;g__Terracidiphilus
ASV1097	0	0	0	0	0	0	0	0	17	0	0	0	0	0	0	0	0	0	788.1	0	0.001	157.62	17.2661	1.91098e-06	0.000112236	d__Bacteria;p__Proteobacteria;c__Alphaproteobacteria;o__Hyphomicrobiales;f__norank;g__Pseudorhodoplanes;s__Pseudorhodoplanes sinuspersici
ASV10970	0	0	0	0	0	0	4	0	0	0	0	0	0	0	0	0	169.03	0	0	0	0.001	33.806	15.045	0.125007	0.349364	d__Bacteria;p__Proteobacteria;c__Alphaproteobacteria;o__Rhodospirillales;f__Stellaceae;g__Stella;s__Stella vacuolata
ASV10971	0	0	0	0	0	4	0	0	0	0	0	0	0	0	0	221.9	0	0	0	0	0.001	44.38	15.4376	0.0625063	0.332325	d__Bacteria;p__Verrucomicrobia;c__Spartobacteria;o__Chthoniobacterales;f__Chthoniobacteraceae;g__Candidatus Udaeobacter
ASV10972	4	0	0	0	0	0	0	0	0	0	177.19	0	0	0	0	0	0	0	0	0	35.438	0.001	-15.113	0.125007	0.349364	d__Bacteria;p__Bacteroidetes;c__Cytophagia;o__Cytophagales;f__Cytophagaceae;g__Sporocytophaga;s__metagenome
ASV10973	0	0	4	0	0	0	0	0	0	0	0	0	168.72	0	0	0	0	0	0	0	33.744	0.001	-15.0423	0.250007	0.441558	d__Bacteria;p__Firmicutes;c__Bacilli;o__Bacillales;f__Staphylococcaceae;g__Staphylococcus;s__Staphylococcus capitis
ASV10974	0	4	0	0	0	0	0	0	0	0	0	180.35	0	0	0	0	0	0	0	0	36.07	0.001	-15.1385	0.125007	0.349364	d__Bacteria;p__Proteobacteria;c__Betaproteobacteria;o__Burkholderiales;f__Oxalobacteraceae;g__Duganella;s__Duganella sp003217375
ASV10975	0	0	0	4	0	0	0	0	0	0	0	0	0	185.37	0	0	0	0	0	0	37.074	0.001	-15.1781	0.0625063	0.332325	d__Bacteria;p__Planctomycetes;c__Planctomycetia;o__Isosphaerales;f__Isosphaeraceae;g__Singulisphaera;s__Singulisphaera sp900129635
ASV10976	0	0	0	0	0	4	0	0	0	0	0	0	0	0	0	221.9	0	0	0	0	0.001	44.38	15.4376	0.0625063	0.332325	d__Bacteria;p__Verrucomicrobia;c__Spartobacteria;o__norank;f__norank;g__Candidatus Xiphinematobacter;s__uncultured bacterium
ASV10977	0	0	0	4	0	0	0	0	0	0	0	0	0	185.37	0	0	0	0	0	0	37.074	0.001	-15.1781	0.0625063	0.332325	d__Bacteria;p__Acidobacteria;c__Acidobacteriia;o__Bryobacterales;f__Bryobacteraceae;g__Bryobacter;s__Bryobacter aggregatus
ASV10978	0	0	4	0	0	0	0	0	0	0	0	0	168.72	0	0	0	0	0	0	0	33.744	0.001	-15.0423	0.250007	0.441558	d__Bacteria;p__Proteobacteria;c__Betaproteobacteria;o__Burkholderiales;f__Burkholderiaceae;g__Paraburkholderia;s__Paraburkholderia sp900104795
ASV10979	0	0	0	0	0	0	0	0	4	0	0	0	0	0	0	0	0	0	185.43	0	0.001	37.086	15.1786	0.0625063	0.332325	d__Bacteria;p__Proteobacteria;c__Betaproteobacteria;o__Burkholderiales;f__Comamonadaceae;g__Variovorax;s__Variovorax paradoxus_A
ASV1098	0	14	0	0	0	0	0	0	0	3	0	631.23	0	0	0	0	0	0	0	134.21	126.246	26.842	-2.23367	0.000274949	0.00753648	d__Bacteria;p__Acidobacteria;c__Acidobacteriia;o__Bryobacterales;f__Solibacteraceae;g__Candidatus Solibacter;s__Solibacter usitatus
ASV10980	0	4	0	0	0	0	0	0	0	0	0	180.35	0	0	0	0	0	0	0	0	36.07	0.001	-15.1385	0.125007	0.349364	d__Bacteria;p__Planctomycetes;c__Planctomycetia;o__Isosphaerales;f__Isosphaeraceae;g__Singulisphaera;s__Singulisphaera sp900129635
ASV10981	0	0	0	0	0	0	0	0	0	4	0	0	0	0	0	0	0	0	0	178.95	0.001	35.79	15.1273	0.250007	0.441558	d__Bacteria;p__Proteobacteria;c__Alphaproteobacteria;o__Micropepsales;f__Micropepsaceae;g__Rhizomicrobium;s__Rhizomicrobium sp013149165
ASV10982	0	0	0	0	0	0	0	0	0	4	0	0	0	0	0	0	0	0	0	178.95	0.001	35.79	15.1273	0.250007	0.441558	d__Bacteria;p__Firmicutes;c__Negativicutes;o__Selenomonadales;f__Sporomusaceae;g__Thermosinus;s__Thermosinus carboxydivorans
ASV10983	0	0	0	0	0	4	0	0	0	0	0	0	0	0	0	221.9	0	0	0	0	0.001	44.38	15.4376	0.0625063	0.332325	d__Bacteria;p__Acidobacteria;c__Acidobacteriia;o__Bryobacterales;f__Solibacteraceae;g__Candidatus Solibacter;s__Solibacter usitatus
ASV10984	0	0	0	0	0	0	0	0	0	4	0	0	0	0	0	0	0	0	0	178.95	0.001	35.79	15.1273	0.250007	0.441558	d__Bacteria;p__Acidobacteria;c__Vicinamibacteria;o__norank;f__Vicinamibacteraceae;g__Luteitalea;s__Luteitalea pratensis
ASV10985	4	0	0	0	0	0	0	0	0	0	177.19	0	0	0	0	0	0	0	0	0	35.438	0.001	-15.113	0.125007	0.349364	Unclassified
ASV10986	0	0	0	0	0	0	0	0	0	4	0	0	0	0	0	0	0	0	0	178.95	0.001	35.79	15.1273	0.250007	0.441558	d__Bacteria;p__Verrucomicrobia;c__Spartobacteria;o__Chthoniobacterales;f__Chthoniobacteraceae;g__Candidatus Udaeobacter;s__Udaeobacter sp003218615
ASV10987	0	0	0	4	0	0	0	0	0	0	0	0	0	185.37	0	0	0	0	0	0	37.074	0.001	-15.1781	0.0625063	0.332325	d__Bacteria;p__Planctomycetes;c__Planctomycetia;o__Gemmatales;f__Gemmataceae;g__Fimbriiglobus;s__Fimbriiglobus ruber
ASV10988	0	0	0	0	0	4	0	0	0	0	0	0	0	0	0	221.9	0	0	0	0	0.001	44.38	15.4376	0.0625063	0.332325	d__Bacteria;p__Cyanobacteria;c__norank;o__Nostocales;f__Aphanizomenonaceae;g__Dolichospermum;s__Dolichospermum flosaquae
ASV10989	4	0	0	0	0	0	0	0	0	0	177.19	0	0	0	0	0	0	0	0	0	35.438	0.001	-15.113	0.125007	0.349364	d__Bacteria;p__Proteobacteria;c__Alphaproteobacteria;o__Hyphomicrobiales;f__Bradyrhizobiaceae;g__Bradyrhizobium;s__Bradyrhizobium elkanii
ASV1099	0	0	0	17	0	0	0	0	0	0	0	0	0	787.84	0	0	0	0	0	0	157.568	0.001	-17.2656	7.64107e-06	0.000371087	d__Bacteria;p__Bacteroidetes;c__Sphingobacteriia;o__Sphingobacteriales;f__Sphingobacteriaceae;g__Mucilaginibacter;s__Mucilaginibacter ginsenosidivorans
ASV10990	0	4	0	0	0	0	0	0	0	0	0	180.35	0	0	0	0	0	0	0	0	36.07	0.001	-15.1385	0.125007	0.349364	d__Bacteria;p__Proteobacteria;c__Deltaproteobacteria;o__Myxococcales;f__Sandaracinaceae;g__Sandaracinus;s__Sandaracinus amylolyticus
ASV10991	0	0	0	0	0	0	4	0	0	0	0	0	0	0	0	0	169.03	0	0	0	0.001	33.806	15.045	0.125007	0.349364	d__Bacteria;p__Proteobacteria;c__Alphaproteobacteria;o__Rhodospirillales;f__Stellaceae;g__Stella;s__Stella humosa
ASV10992	0	0	0	0	0	0	0	0	4	0	0	0	0	0	0	0	0	0	185.43	0	0.001	37.086	15.1786	0.0625063	0.332325	d__Bacteria;p__Bacteroidetes;c__Sphingobacteriia;o__Sphingobacteriales;f__Sphingobacteriaceae;g__Anseongella;s__Anseongella ginsenosidimutans
ASV10993	0	0	0	0	0	0	0	0	4	0	0	0	0	0	0	0	0	0	185.43	0	0.001	37.086	15.1786	0.0625063	0.332325	d__Bacteria;p__Proteobacteria;c__Gammaproteobacteria;o__Pseudomonadales;f__Pseudomonadaceae;g__Pseudomonas;s__Pseudomonas putida
ASV10994	0	0	0	0	0	4	0	0	0	0	0	0	0	0	0	221.9	0	0	0	0	0.001	44.38	15.4376	0.0625063	0.332325	d__Bacteria;p__Acidobacteria;c__Vicinamibacteria;o__norank;f__Vicinamibacteraceae;g__Luteitalea;s__Luteitalea pratensis
ASV10995	0	4	0	0	0	0	0	0	0	0	0	180.35	0	0	0	0	0	0	0	0	36.07	0.001	-15.1385	0.125007	0.349364	d__Bacteria;p__Acidobacteria;c__Acidobacteriia;o__Acidobacteriales;f__Acidobacteriaceae;g__Candidatus Koribacter;s__Koribacter versatilis
ASV10996	0	0	0	0	0	0	0	0	4	0	0	0	0	0	0	0	0	0	185.43	0	0.001	37.086	15.1786	0.0625063	0.332325	d__Bacteria;p__Proteobacteria;c__Betaproteobacteria;o__norank;f__Casimicrobiaceae;g__Casimicrobium;s__Casimicrobium huifangae
ASV10997	0	0	0	0	0	0	4	0	0	0	0	0	0	0	0	0	169.03	0	0	0	0.001	33.806	15.045	0.125007	0.349364	d__Bacteria;p__Proteobacteria;c__Betaproteobacteria;o__Burkholderiales;f__Burkholderiaceae;g__Paraburkholderia;s__Paraburkholderia caribensis
ASV10998	0	4	0	0	0	0	0	0	0	0	0	180.35	0	0	0	0	0	0	0	0	36.07	0.001	-15.1385	0.125007	0.349364	d__Bacteria;p__Acidobacteria;c__Acidobacteriia;o__Bryobacterales;f__Bryobacteraceae
ASV10999	0	0	0	0	0	0	0	0	4	0	0	0	0	0	0	0	0	0	185.43	0	0.001	37.086	15.1786	0.0625063	0.332325	d__Bacteria;p__Actinobacteria;c__Thermoleophilia;o__Solirubrobacterales;f__Conexibacteraceae;g__Conexibacter;s__uncultured Conexibacteraceae bacterium
ASV11	0	0	450	0	0	0	0	0	0	0	0	0	18980.9	0	0	0	0	0	0	0	3796.19	0.001	-21.8561	1.53543e-90	7.71033e-87	d__Bacteria;p__Acidobacteria;c__Acidobacteriia;o__Acidobacteriales;f__Acidobacteriaceae;g__Candidatus Koribacter;s__uncultured bacterium
ASV110	0	0	0	0	0	0	72	0	0	0	0	0	0	0	0	0	3042.6	0	0	0	0.001	608.52	19.2149	1.08776e-22	6.35149e-20	d__Bacteria;p__Proteobacteria;c__Gammaproteobacteria;o__Pseudomonadales;f__Pseudomonadaceae;g__Pseudomonas;s__Pseudomonas putida
ASV1100	0	0	0	17	0	0	0	0	0	0	0	0	0	787.84	0	0	0	0	0	0	157.568	0.001	-17.2656	7.64107e-06	0.000371087	d__Bacteria;p__Chloroflexi;c__Ktedonobacteria;o__Ktedonobacterales;f__Ktedonosporobacteraceae;g__Ktedonosporobacter;s__Ktedonosporobacter rubrisoli
ASV11000	0	0	0	0	4	0	0	0	0	0	0	0	0	0	190.97	0	0	0	0	0	38.194	0.001	-15.2211	0.00781469	0.0892477	d__Bacteria;p__Proteobacteria;c__Alphaproteobacteria;o__Hyphomicrobiales;f__Devosiaceae;g__Youhaiella;s__Youhaiella tibetensis
ASV11001	0	0	0	0	4	0	0	0	0	0	0	0	0	0	190.97	0	0	0	0	0	38.194	0.001	-15.2211	0.00781469	0.0892477	d__Bacteria;p__Acidobacteria;c__Acidobacteriia;o__Acidobacteriales;f__Acidobacteriaceae;g__Candidatus Koribacter;s__Koribacter versatilis
ASV11002	4	0	0	0	0	0	0	0	0	0	177.19	0	0	0	0	0	0	0	0	0	35.438	0.001	-15.113	0.125007	0.349364	d__Bacteria;p__Acidobacteria;c__Acidobacteriia;o__Acidobacteriales;f__Acidobacteriaceae;g__Edaphobacter;s__metagenome
ASV11003	0	0	4	0	0	0	0	0	0	0	0	0	168.72	0	0	0	0	0	0	0	33.744	0.001	-15.0423	0.250007	0.441558	d__Bacteria;p__Acidobacteria;c__Acidobacteriia;o__Acidobacteriales;f__Acidobacteriaceae;g__Occallatibacter;s__uncultured bacterium
ASV11004	0	0	0	0	0	0	0	0	4	0	0	0	0	0	0	0	0	0	185.43	0	0.001	37.086	15.1786	0.0625063	0.332325	d__Bacteria;p__Planctomycetes;c__Planctomycetia;o__Isosphaerales;f__Isosphaeraceae;g__Paludisphaera;s__Paludisphaera sp001610895
ASV11005	0	4	0	0	0	0	0	0	0	0	0	180.35	0	0	0	0	0	0	0	0	36.07	0.001	-15.1385	0.125007	0.349364	d__Bacteria;p__Bacteroidetes;c__Sphingobacteriia;o__Sphingobacteriales;f__Sphingobacteriaceae;g__Mucilaginibacter;s__uncultured bacterium
ASV11006	0	0	4	0	0	0	0	0	0	0	0	0	168.72	0	0	0	0	0	0	0	33.744	0.001	-15.0423	0.250007	0.441558	d__Bacteria;p__Acidobacteria;c__Acidobacteriia;o__Acidobacteriales;f__Acidobacteriaceae;g__Candidatus Koribacter;s__Koribacter versatilis
ASV11007	0	0	0	0	4	0	0	0	0	0	0	0	0	0	190.97	0	0	0	0	0	38.194	0.001	-15.2211	0.00781469	0.0892477	d__Bacteria;p__Armatimonadetes;c__Chthonomonadetes;o__Chthonomonadales;f__Chthonomonadaceae;g__Chthonomonas;s__Chthonomonas calidirosea
ASV11008	0	0	0	0	0	0	0	0	4	0	0	0	0	0	0	0	0	0	185.43	0	0.001	37.086	15.1786	0.0625063	0.332325	d__Bacteria;p__Proteobacteria;c__Deltaproteobacteria;o__Myxococcales;f__Vulgatibacteraceae;g__Vulgatibacter;s__Vulgatibacter incomptus
ASV11009	0	0	0	0	0	0	4	0	0	0	0	0	0	0	0	0	169.03	0	0	0	0.001	33.806	15.045	0.125007	0.349364	d__Bacteria;p__Planctomycetes;c__Phycisphaerae;o__Tepidisphaerales;f__Tepidisphaeraceae;g__Tepidisphaera;s__uncultured bacterium
ASV1101	0	17	0	0	0	0	0	0	0	0	0	766.49	0	0	0	0	0	0	0	0	153.298	0.001	-17.226	7.64107e-06	0.000371087	d__Bacteria;p__Acidobacteria;c__Acidobacteriia;o__Acidobacteriales;f__Acidobacteriaceae;g__Edaphobacter
ASV11010	4	0	0	0	0	0	0	0	0	0	177.19	0	0	0	0	0	0	0	0	0	35.438	0.001	-15.113	0.125007	0.349364	d__Bacteria;p__Proteobacteria;c__Alphaproteobacteria;o__Holosporales;f__Candidatus Paracaedibacteraceae;g__Candidatus Finniella;s__uncultured bacterium
ASV11011	0	0	4	0	0	0	0	0	0	0	0	0	168.72	0	0	0	0	0	0	0	33.744	0.001	-15.0423	0.250007	0.441558	d__Bacteria;p__Acidobacteria;c__Acidobacteriia;o__Bryobacterales;f__Solibacteraceae;g__Candidatus Solibacter;s__Solibacter usitatus
ASV11012	0	4	0	0	0	0	0	0	0	0	0	180.35	0	0	0	0	0	0	0	0	36.07	0.001	-15.1385	0.125007	0.349364	d__Bacteria
ASV11013	0	0	0	0	0	0	4	0	0	0	0	0	0	0	0	0	169.03	0	0	0	0.001	33.806	15.045	0.125007	0.349364	d__Bacteria;p__Proteobacteria;c__Deltaproteobacteria;o__Myxococcales;f__Polyangiaceae;g__Chondromyces;s__Chondromyces crocatus
ASV11014	0	0	0	0	0	0	4	0	0	0	0	0	0	0	0	0	169.03	0	0	0	0.001	33.806	15.045	0.125007	0.349364	d__Bacteria;p__Verrucomicrobia;c__Spartobacteria;o__Chthoniobacterales;f__Chthoniobacteraceae;g__Candidatus Udaeobacter;s__Udaeobacter sp003218615
ASV11015	4	0	0	0	0	0	0	0	0	0	177.19	0	0	0	0	0	0	0	0	0	35.438	0.001	-15.113	0.125007	0.349364	d__Bacteria;p__Proteobacteria;c__Betaproteobacteria;o__Burkholderiales;f__Burkholderiaceae;g__Pandoraea;s__Pandoraea apista
ASV11016	4	0	0	0	0	0	0	0	0	0	177.19	0	0	0	0	0	0	0	0	0	35.438	0.001	-15.113	0.125007	0.349364	d__Bacteria;p__Bacteroidetes;c__Chitinophagia;o__Chitinophagales;f__Chitinophagaceae;g__Flavipsychrobacter;s__Flavipsychrobacter sp013286835
ASV11017	0	0	0	0	0	0	0	0	0	4	0	0	0	0	0	0	0	0	0	178.95	0.001	35.79	15.1273	0.250007	0.441558	d__Bacteria;p__Proteobacteria;c__Alphaproteobacteria;o__Rhodospirillales;f__Acetobacteraceae;g__Acidiphilium;s__Acidiphilium sp002255515
ASV11018	0	0	0	4	0	0	0	0	0	0	0	0	0	185.37	0	0	0	0	0	0	37.074	0.001	-15.1781	0.0625063	0.332325	d__Bacteria;p__Proteobacteria;c__Alphaproteobacteria;o__Micropepsales;f__Micropepsaceae;g__Rhizomicrobium;s__Rhizomicrobium sp013149165
ASV11019	0	0	0	0	4	0	0	0	0	0	0	0	0	0	190.97	0	0	0	0	0	38.194	0.001	-15.2211	0.00781469	0.0892477	d__Bacteria;p__Proteobacteria;c__Betaproteobacteria;o__Burkholderiales;f__Burkholderiaceae;g__Paraburkholderia;s__Paraburkholderia metrosideri
ASV1102	0	0	17	0	0	0	0	0	0	0	0	0	717.06	0	0	0	0	0	0	0	143.412	0.001	-17.1298	0.0009771	0.0195951	d__Bacteria;p__Acidobacteria;c__Vicinamibacteria;o__norank;f__Vicinamibacteraceae;g__Luteitalea;s__Luteitalea pratensis
ASV11020	0	0	0	0	0	4	0	0	0	0	0	0	0	0	0	221.9	0	0	0	0	0.001	44.38	15.4376	0.0625063	0.332325	d__Bacteria;p__Proteobacteria;c__Gammaproteobacteria;o__Cellvibrionales;f__Halieaceae;g__Congregibacter;s__Congregibacter litoralis
ASV11021	0	0	0	0	0	0	0	0	0	4	0	0	0	0	0	0	0	0	0	178.95	0.001	35.79	15.1273	0.250007	0.441558	d__Bacteria;p__Planctomycetes;c__Planctomycetia;o__Pirellulales;f__Pirellulaceae;g__Rhodopirellula;s__uncultured bacterium
ASV11022	0	0	0	0	0	0	0	0	4	0	0	0	0	0	0	0	0	0	185.43	0	0.001	37.086	15.1786	0.0625063	0.332325	d__Bacteria;p__Proteobacteria;c__Betaproteobacteria;o__Burkholderiales;f__Comamonadaceae;g__Rhodoferax;s__Rhodoferax sp002943465
ASV11023	0	0	0	0	0	4	0	0	0	0	0	0	0	0	0	221.9	0	0	0	0	0.001	44.38	15.4376	0.0625063	0.332325	d__Bacteria;p__Cyanobacteria;c__norank;o__Synechococcales;f__Prochlorotrichaceae;g__Nodosilinea;s__Nodosilinea sp003017855
ASV11024	0	0	0	0	0	0	0	0	4	0	0	0	0	0	0	0	0	0	185.43	0	0.001	37.086	15.1786	0.0625063	0.332325	d__Bacteria;p__Proteobacteria;c__Betaproteobacteria;o__norank;f__Casimicrobiaceae;g__Casimicrobium;s__Casimicrobium huifangae
ASV11025	4	0	0	0	0	0	0	0	0	0	177.19	0	0	0	0	0	0	0	0	0	35.438	0.001	-15.113	0.125007	0.349364	d__Bacteria;p__Proteobacteria;c__Gammaproteobacteria;o__Legionellales;f__Legionellaceae;g__Tatlockia;s__Tatlockia hackeliae
ASV11026	0	4	0	0	0	0	0	0	0	0	0	180.35	0	0	0	0	0	0	0	0	36.07	0.001	-15.1385	0.125007	0.349364	d__Bacteria;p__Planctomycetes;c__Planctomycetia;o__Gemmatales;f__Gemmataceae;g__Fimbriiglobus;s__Fimbriiglobus ruber
ASV11027	0	0	0	4	0	0	0	0	0	0	0	0	0	185.37	0	0	0	0	0	0	37.074	0.001	-15.1781	0.0625063	0.332325	d__Bacteria;p__Proteobacteria;c__Betaproteobacteria;o__Burkholderiales;f__norank;g__Rhizobacter;s__Rhizobacter sp000799605
ASV11028	4	0	0	0	0	0	0	0	0	0	177.19	0	0	0	0	0	0	0	0	0	35.438	0.001	-15.113	0.125007	0.349364	d__Bacteria;p__Proteobacteria;c__Gammaproteobacteria;o__norank;f__norank;g__Acidibacter;s__uncultured bacterium
ASV11029	0	0	0	0	4	0	0	0	0	0	0	0	0	0	190.97	0	0	0	0	0	38.194	0.001	-15.2211	0.00781469	0.0892477	d__Bacteria;p__Proteobacteria;c__Alphaproteobacteria;o__Rhodospirillales;f__Azospirillaceae;g__Skermanella;s__Skermanella pratensis
ASV1103	0	0	0	0	0	0	17	0	0	0	0	0	0	0	0	0	718.39	0	0	0	0.001	143.678	17.1325	7.64107e-06	0.000371087	d__Bacteria;p__Acidobacteria;c__Acidobacteriia;o__Acidobacteriales;f__Acidobacteriaceae;g__Candidatus Koribacter;s__uncultured bacterium
ASV11030	0	0	0	0	0	0	0	0	4	0	0	0	0	0	0	0	0	0	185.43	0	0.001	37.086	15.1786	0.0625063	0.332325	d__Bacteria;p__Chloroflexi;c__Caldilineae;o__Caldilineales;f__Caldilineaceae;g__Litorilinea;s__Litorilinea aerophila
ASV11031	0	0	0	0	4	0	0	0	0	0	0	0	0	0	190.97	0	0	0	0	0	38.194	0.001	-15.2211	0.00781469	0.0892477	d__Bacteria;p__Verrucomicrobia;c__Verrucomicrobiae;o__Verrucomicrobiales;f__Verrucomicrobia subdivision 3;g__Pedosphaera;s__uncultured Verrucomicrobia bacterium
ASV11032	0	0	0	0	0	4	0	0	0	0	0	0	0	0	0	221.9	0	0	0	0	0.001	44.38	15.4376	0.0625063	0.332325	d__Bacteria;p__Proteobacteria;c__Betaproteobacteria;o__Nitrosomonadales;f__Sterolibacteriaceae;g__Methyloversatilis;s__Methyloversatilis universalis
ASV11033	0	0	0	0	4	0	0	0	0	0	0	0	0	0	190.97	0	0	0	0	0	38.194	0.001	-15.2211	0.00781469	0.0892477	d__Bacteria;p__Proteobacteria;c__Deltaproteobacteria;o__Myxococcales;f__Labilitrichaceae;g__Labilithrix;s__Labilithrix luteola
ASV11034	0	0	0	0	0	0	4	0	0	0	0	0	0	0	0	0	169.03	0	0	0	0.001	33.806	15.045	0.125007	0.349364	d__Bacteria;p__Verrucomicrobia;c__Verrucomicrobiae;o__Verrucomicrobiales;f__Verrucomicrobia subdivision 3;g__Pedosphaera;s__uncultured bacterium
ASV11035	0	0	0	4	0	0	0	0	0	0	0	0	0	185.37	0	0	0	0	0	0	37.074	0.001	-15.1781	0.0625063	0.332325	d__Bacteria;p__Actinobacteria;c__Actinomycetia;o__Streptosporangiales;f__Thermomonosporaceae;g__Actinocorallia;s__Actinocorallia herbida
ASV11036	0	0	0	0	0	0	4	0	0	0	0	0	0	0	0	0	169.03	0	0	0	0.001	33.806	15.045	0.125007	0.349364	d__Bacteria;p__Proteobacteria;c__Alphaproteobacteria;o__Hyphomicrobiales;f__norank;g__Pseudorhodoplanes;s__Pseudorhodoplanes sinuspersici
ASV11037	0	0	0	0	0	4	0	0	0	0	0	0	0	0	0	221.9	0	0	0	0	0.001	44.38	15.4376	0.0625063	0.332325	d__Bacteria;p__Gemmatimonadetes;c__Gemmatimonadetes;o__Gemmatimonadales;f__Gemmatimonadaceae;g__Gemmatimonas;s__Gemmatimonas sp013004105
ASV11038	0	0	0	4	0	0	0	0	0	0	0	0	0	185.37	0	0	0	0	0	0	37.074	0.001	-15.1781	0.0625063	0.332325	d__Bacteria;p__Acidobacteria;c__Acidobacteriia;o__Acidobacteriales;f__Acidobacteriaceae;g__Terracidiphilus
ASV11039	0	0	0	0	0	0	0	0	4	0	0	0	0	0	0	0	0	0	185.43	0	0.001	37.086	15.1786	0.0625063	0.332325	d__Bacteria;p__Acidobacteria;c__Acidobacteriia;o__Bryobacterales;f__Solibacteraceae;g__Candidatus Solibacter;s__Solibacter usitatus
ASV1104	17	0	0	0	0	0	0	0	0	0	753.05	0	0	0	0	0	0	0	0	0	150.61	0.001	-17.2005	0.000122181	0.00397117	d__Bacteria;p__Acidobacteria;c__Acidobacteriia;o__Acidobacteriales;f__Acidobacteriaceae;g__Candidatus Koribacter;s__uncultured bacterium
ASV11040	4	0	0	0	0	0	0	0	0	0	177.19	0	0	0	0	0	0	0	0	0	35.438	0.001	-15.113	0.125007	0.349364	d__Bacteria;p__Proteobacteria;c__Deltaproteobacteria;o__Desulfuromonadales;f__Geobacteraceae;g__Geoalkalibacter;s__uncultured bacterium
ASV11041	0	4	0	0	0	0	0	0	0	0	0	180.35	0	0	0	0	0	0	0	0	36.07	0.001	-15.1385	0.125007	0.349364	d__Bacteria;p__Planctomycetes;c__Planctomycetia;o__Gemmatales;f__Gemmataceae;g__Fimbriiglobus;s__Fimbriiglobus ruber
ASV11042	0	4	0	0	0	0	0	0	0	0	0	180.35	0	0	0	0	0	0	0	0	36.07	0.001	-15.1385	0.125007	0.349364	d__Bacteria;p__Armatimonadetes;c__Armatimonadia;o__Armatimonadales;f__Armatimonadaceae;g__Armatimonas;s__uncultured bacterium
ASV11043	0	0	4	0	0	0	0	0	0	0	0	0	168.72	0	0	0	0	0	0	0	33.744	0.001	-15.0423	0.250007	0.441558	d__Bacteria;p__Acidobacteria;c__Acidobacteriia;o__Acidobacteriales;f__Acidobacteriaceae;g__Candidatus Koribacter;s__uncultured bacterium
ASV11044	0	0	0	0	0	0	4	0	0	0	0	0	0	0	0	0	169.03	0	0	0	0.001	33.806	15.045	0.125007	0.349364	d__Bacteria;p__Proteobacteria;c__Deltaproteobacteria;o__Myxococcales;f__norank;g__Minicystis;s__Minicystis rosea
ASV11045	0	0	4	0	0	0	0	0	0	0	0	0	168.72	0	0	0	0	0	0	0	33.744	0.001	-15.0423	0.250007	0.441558	d__Bacteria;p__Acidobacteria;c__Acidobacteriia;o__Bryobacterales;f__Solibacteraceae;g__Candidatus Solibacter;s__Solibacter usitatus
ASV11046	0	0	4	0	0	0	0	0	0	0	0	0	168.72	0	0	0	0	0	0	0	33.744	0.001	-15.0423	0.250007	0.441558	d__Bacteria;p__Acidobacteria;c__Acidobacteriia;o__Bryobacterales;f__Solibacteraceae;g__Candidatus Solibacter;s__Solibacter usitatus
ASV11047	4	0	0	0	0	0	0	0	0	0	177.19	0	0	0	0	0	0	0	0	0	35.438	0.001	-15.113	0.125007	0.349364	d__Bacteria;p__Proteobacteria;c__Alphaproteobacteria;o__Hyphomicrobiales;f__Hyphomicrobiaceae;g__Rhodoplanes;s__uncultured bacterium
ASV11048	4	0	0	0	0	0	0	0	0	0	177.19	0	0	0	0	0	0	0	0	0	35.438	0.001	-15.113	0.125007	0.349364	d__Bacteria;p__Acidobacteria;c__Acidobacteriia;o__Acidobacteriales;f__Acidobacteriaceae;g__Silvibacterium;s__Silvibacterium bohemicum
ASV11049	0	0	0	0	0	4	0	0	0	0	0	0	0	0	0	221.9	0	0	0	0	0.001	44.38	15.4376	0.0625063	0.332325	d__Bacteria;p__Candidatus Dormibacteraeota;c__norank;o__norank;f__norank;g__Candidatus Dormibacter;s__Dormibacter sp003244185
ASV1105	0	0	0	0	17	0	0	0	0	0	0	0	0	0	811.61	0	0	0	0	0	162.322	0.001	-17.3085	1.87076e-09	2.33687e-07	d__Bacteria;p__Verrucomicrobia;c__Verrucomicrobiae;o__Verrucomicrobiales;f__Verrucomicrobia subdivision 3;g__Pedosphaera;s__uncultured bacterium
ASV11050	0	0	0	4	0	0	0	0	0	0	0	0	0	185.37	0	0	0	0	0	0	37.074	0.001	-15.1781	0.0625063	0.332325	d__Bacteria;p__Proteobacteria;c__Alphaproteobacteria;o__Rhodospirillales;f__Acetobacteraceae;g__Siccirubricoccus;s__Siccirubricoccus deserti
ASV11051	4	0	0	0	0	0	0	0	0	0	177.19	0	0	0	0	0	0	0	0	0	35.438	0.001	-15.113	0.125007	0.349364	d__Bacteria;p__Actinobacteria;c__Rubrobacteria;o__Gaiellales;f__Gaiellaceae;g__Gaiella;s__Gaiella occulta
ASV11052	0	0	0	0	0	0	0	0	4	0	0	0	0	0	0	0	0	0	185.43	0	0.001	37.086	15.1786	0.0625063	0.332325	d__Bacteria;p__Actinobacteria;c__Actinomycetia;o__Corynebacteriales;f__Mycobacteriaceae;g__Mycobacterium;s__Mycobacterium mantenii
ASV11053	0	4	0	0	0	0	0	0	0	0	0	180.35	0	0	0	0	0	0	0	0	36.07	0.001	-15.1385	0.125007	0.349364	d__Bacteria;p__Proteobacteria;c__Betaproteobacteria;o__Rhodocyclales;f__Rhodocyclaceae;g__Rhodocyclus;s__Rhodocyclus tenuis
ASV11054	0	0	0	0	4	0	0	0	0	0	0	0	0	0	190.97	0	0	0	0	0	38.194	0.001	-15.2211	0.00781469	0.0892477	d__Bacteria;p__Proteobacteria;c__Alphaproteobacteria;o__Hyphomicrobiales
ASV11055	4	0	0	0	0	0	0	0	0	0	177.19	0	0	0	0	0	0	0	0	0	35.438	0.001	-15.113	0.125007	0.349364	d__Bacteria;p__Proteobacteria;c__Betaproteobacteria;o__Burkholderiales;f__Burkholderiaceae;g__Paraburkholderia;s__Paraburkholderia hospita
ASV11056	0	0	0	0	0	0	0	0	0	4	0	0	0	0	0	0	0	0	0	178.95	0.001	35.79	15.1273	0.250007	0.441558	d__Bacteria;p__Bacteroidetes;c__Chitinophagia;o__Chitinophagales;f__Chitinophagaceae;g__Flavihumibacter;s__Flavihumibacter stibioxidans
ASV11057	4	0	0	0	0	0	0	0	0	0	177.19	0	0	0	0	0	0	0	0	0	35.438	0.001	-15.113	0.125007	0.349364	d__Bacteria;p__Proteobacteria;c__Alphaproteobacteria;o__Rhodospirillales;f__Rhodospirillaceae;g__Hypericibacter;s__Hypericibacter adhaerens
ASV11058	0	0	0	0	0	0	4	0	0	0	0	0	0	0	0	0	169.03	0	0	0	0.001	33.806	15.045	0.125007	0.349364	d__Bacteria;p__Actinobacteria;c__Actinomycetia;o__Kineosporiales;f__Kineosporiaceae;g__Quadrisphaera;s__Quadrisphaera granulorum
ASV11059	0	0	0	0	0	0	4	0	0	0	0	0	0	0	0	0	169.03	0	0	0	0.001	33.806	15.045	0.125007	0.349364	d__Bacteria;p__Acidobacteria;c__Acidobacteriia;o__Acidobacteriales;f__Acidobacteriaceae;g__Candidatus Koribacter;s__uncultured bacterium
ASV1106	0	17	0	0	0	0	0	0	0	0	0	766.49	0	0	0	0	0	0	0	0	153.298	0.001	-17.226	7.64107e-06	0.000371087	d__Bacteria;p__Proteobacteria;c__Betaproteobacteria;o__Burkholderiales;f__Oxalobacteraceae;g__Massilia;s__uncultured bacterium
ASV11060	0	4	0	0	0	0	0	0	0	0	0	180.35	0	0	0	0	0	0	0	0	36.07	0.001	-15.1385	0.125007	0.349364	d__Bacteria;p__Acidobacteria;c__Blastocatellia;o__Blastocatellales;f__Blastocatellaceae;g__Stenotrophobacter;s__uncultured Acidobacteria bacterium
ASV11061	0	4	0	0	0	0	0	0	0	0	0	180.35	0	0	0	0	0	0	0	0	36.07	0.001	-15.1385	0.125007	0.349364	d__Bacteria;p__Verrucomicrobia;c__Spartobacteria;o__Chthoniobacterales;f__Chthoniobacteraceae;g__Chthoniobacter;s__Chthoniobacter flavus
ASV11062	0	4	0	0	0	0	0	0	0	0	0	180.35	0	0	0	0	0	0	0	0	36.07	0.001	-15.1385	0.125007	0.349364	d__Bacteria;p__Proteobacteria;c__Deltaproteobacteria;o__Myxococcales;f__Myxococcaceae;g__Myxococcus;s__Myxococcus fulvus
ASV11063	0	0	0	0	0	0	0	0	4	0	0	0	0	0	0	0	0	0	185.43	0	0.001	37.086	15.1786	0.0625063	0.332325	d__Bacteria;p__Proteobacteria;c__Betaproteobacteria;o__Burkholderiales;f__Burkholderiaceae;g__Paraburkholderia;s__Paraburkholderia hospita
ASV11064	0	0	0	0	0	4	0	0	0	0	0	0	0	0	0	221.9	0	0	0	0	0.001	44.38	15.4376	0.0625063	0.332325	d__Bacteria;p__Acidobacteria;c__Acidobacteriia;o__Acidobacteriales;f__Acidobacteriaceae;g__Candidatus Koribacter;s__uncultured bacterium
ASV11065	0	0	0	0	0	0	4	0	0	0	0	0	0	0	0	0	169.03	0	0	0	0.001	33.806	15.045	0.125007	0.349364	d__Bacteria;p__Acidobacteria;c__Acidobacteriia;o__Acidobacteriales;f__Acidobacteriaceae;g__Terracidiphilus;s__Terracidiphilus sp903849645
ASV11066	0	0	0	0	4	0	0	0	0	0	0	0	0	0	190.97	0	0	0	0	0	38.194	0.001	-15.2211	0.00781469	0.0892477	d__Bacteria;p__Verrucomicrobia;c__Spartobacteria;o__Chthoniobacterales;f__Chthoniobacteraceae;g__Chthoniobacter;s__Chthoniobacter flavus
ASV11067	4	0	0	0	0	0	0	0	0	0	177.19	0	0	0	0	0	0	0	0	0	35.438	0.001	-15.113	0.125007	0.349364	d__Bacteria;p__Acidobacteria;c__Acidobacteriia;o__Acidobacteriales;f__Acidobacteriaceae;g__Edaphobacter
ASV11068	0	0	0	0	0	0	0	0	0	4	0	0	0	0	0	0	0	0	0	178.95	0.001	35.79	15.1273	0.250007	0.441558	d__Bacteria;p__Proteobacteria;c__Betaproteobacteria;o__Burkholderiales;f__Burkholderiaceae;g__Cupriavidus;s__Cupriavidus gilardii
ASV11069	0	0	0	0	0	4	0	0	0	0	0	0	0	0	0	221.9	0	0	0	0	0.001	44.38	15.4376	0.0625063	0.332325	d__Bacteria;p__Proteobacteria;c__Betaproteobacteria;o__Rhodocyclales;f__Rhodocyclaceae;g__Rhodocyclus;s__Rhodocyclus tenuis
ASV1107	0	0	0	0	0	0	0	0	0	17	0	0	0	0	0	0	0	0	0	760.52	0.001	152.104	17.2147	0.000244331	0.00670089	d__Bacteria;p__Fibrobacteres;c__Fibrobacteria;o__Fibrobacterales;f__Fibrobacteraceae;g__Fibrobacter;s__Fibrobacter sp003149045
ASV11070	0	0	0	0	0	0	4	0	0	0	0	0	0	0	0	0	169.03	0	0	0	0.001	33.806	15.045	0.125007	0.349364	d__Bacteria;p__Acidobacteria;c__Acidobacteriia;o__Acidobacteriales;f__Acidobacteriaceae;g__Edaphobacter
ASV11071	0	0	0	0	0	0	0	0	4	0	0	0	0	0	0	0	0	0	185.43	0	0.001	37.086	15.1786	0.0625063	0.332325	d__Bacteria;p__Proteobacteria;c__Alphaproteobacteria;o__Hyphomicrobiales;f__Xanthobacteraceae;g__Pseudolabrys;s__uncultured bacterium
ASV11072	4	0	0	0	0	0	0	0	0	0	177.19	0	0	0	0	0	0	0	0	0	35.438	0.001	-15.113	0.125007	0.349364	d__Bacteria;p__Proteobacteria;c__Deltaproteobacteria;o__Myxococcales;f__Kofleriaceae;g__Haliangium;s__Haliangium ochraceum
ASV11073	0	0	0	0	0	4	0	0	0	0	0	0	0	0	0	221.9	0	0	0	0	0.001	44.38	15.4376	0.0625063	0.332325	d__Bacteria;p__Proteobacteria;c__Alphaproteobacteria;o__Rhodospirillales;f__Stellaceae;g__Stella;s__Stella vacuolata
ASV11074	0	0	4	0	0	0	0	0	0	0	0	0	168.72	0	0	0	0	0	0	0	33.744	0.001	-15.0423	0.250007	0.441558	d__Bacteria;p__Cyanobacteria;c__norank;o__Nostocales;f__Aphanizomenonaceae;g__Dolichospermum;s__Dolichospermum flosaquae
ASV11075	0	4	0	0	0	0	0	0	0	0	0	180.35	0	0	0	0	0	0	0	0	36.07	0.001	-15.1385	0.125007	0.349364	d__Bacteria;p__Verrucomicrobia;c__Verrucomicrobiae;o__Verrucomicrobiales;f__Verrucomicrobia subdivision 3;g__Pedosphaera;s__uncultured bacterium
ASV11076	0	0	4	0	0	0	0	0	0	0	0	0	168.72	0	0	0	0	0	0	0	33.744	0.001	-15.0423	0.250007	0.441558	d__Bacteria;p__Acidobacteria;c__Acidobacteriia;o__Acidobacteriales;f__Acidobacteriaceae;g__Granulicella;s__uncultured Acidobacteria bacterium
ASV11077	0	0	0	0	0	0	4	0	0	0	0	0	0	0	0	0	169.03	0	0	0	0.001	33.806	15.045	0.125007	0.349364	d__Bacteria;p__Actinobacteria;c__Acidimicrobiia;o__Acidimicrobiales;f__Acidimicrobiaceae;g__Acidimicrobium;s__Acidimicrobium ferrooxidans
ASV11078	4	0	0	0	0	0	0	0	0	0	177.19	0	0	0	0	0	0	0	0	0	35.438	0.001	-15.113	0.125007	0.349364	d__Bacteria;p__Proteobacteria;c__Betaproteobacteria;o__Burkholderiales;f__Oxalobacteraceae;g__Pseudoduganella;s__Pseudoduganella lutea
ASV11079	4	0	0	0	0	0	0	0	0	0	177.19	0	0	0	0	0	0	0	0	0	35.438	0.001	-15.113	0.125007	0.349364	d__Bacteria;p__Verrucomicrobia;c__Verrucomicrobiae;o__Verrucomicrobiales;f__Verrucomicrobia subdivision 3;g__Pedosphaera;s__uncultured bacterium
ASV1108	0	0	0	0	0	0	0	0	17	0	0	0	0	0	0	0	0	0	788.1	0	0.001	157.62	17.2661	1.91098e-06	0.000112236	d__Bacteria;p__Acidobacteria;c__Acidobacteriia;o__Acidobacteriales;f__Acidobacteriaceae;g__Candidatus Koribacter;s__uncultured bacterium
ASV11080	0	0	0	0	0	4	0	0	0	0	0	0	0	0	0	221.9	0	0	0	0	0.001	44.38	15.4376	0.0625063	0.332325	d__Bacteria;p__Verrucomicrobia;c__Spartobacteria;o__Chthoniobacterales;f__Chthoniobacteraceae;g__Chthoniobacter;s__Chthoniobacter flavus
ASV11081	0	4	0	0	0	0	0	0	0	0	0	180.35	0	0	0	0	0	0	0	0	36.07	0.001	-15.1385	0.125007	0.349364	d__Bacteria;p__Acidobacteria;c__Acidobacteriia;o__Acidobacteriales;f__Acidobacteriaceae;g__Terracidiphilus;s__Terracidiphilus sp903849645
ASV11082	0	0	0	0	0	0	4	0	0	0	0	0	0	0	0	0	169.03	0	0	0	0.001	33.806	15.045	0.125007	0.349364	d__Bacteria;p__Proteobacteria;c__Betaproteobacteria;o__Burkholderiales;f__Oxalobacteraceae;g__Pseudoduganella;s__Pseudoduganella flava
ASV11083	0	0	4	0	0	0	0	0	0	0	0	0	168.72	0	0	0	0	0	0	0	33.744	0.001	-15.0423	0.250007	0.441558	Unclassified
ASV11084	0	0	0	0	0	0	4	0	0	0	0	0	0	0	0	0	169.03	0	0	0	0.001	33.806	15.045	0.125007	0.349364	d__Bacteria;p__Proteobacteria;c__Alphaproteobacteria;o__Hyphomonadales;f__Hyphomonadaceae;g__Hirschia;s__metagenome
ASV11085	0	0	0	0	4	0	0	0	0	0	0	0	0	0	190.97	0	0	0	0	0	38.194	0.001	-15.2211	0.00781469	0.0892477	d__Bacteria;p__Proteobacteria;c__Deltaproteobacteria;o__Myxococcales;f__Anaeromyxobacteraceae;g__Anaeromyxobacter;s__Anaeromyxobacter dehalogenans
ASV11086	0	0	0	0	0	0	0	0	4	0	0	0	0	0	0	0	0	0	185.43	0	0.001	37.086	15.1786	0.0625063	0.332325	d__Bacteria;p__Planctomycetes;c__Planctomycetia;o__Gemmatales;f__Gemmataceae;g__Fimbriiglobus;s__Fimbriiglobus ruber
ASV11087	0	0	0	0	0	0	0	0	0	4	0	0	0	0	0	0	0	0	0	178.95	0.001	35.79	15.1273	0.250007	0.441558	d__Bacteria;p__Acidobacteria;c__Vicinamibacteria;o__norank;f__Vicinamibacteraceae;g__Luteitalea;s__Luteitalea pratensis
ASV11088	0	0	0	0	0	0	0	0	4	0	0	0	0	0	0	0	0	0	185.43	0	0.001	37.086	15.1786	0.0625063	0.332325	d__Bacteria;p__Acidobacteria;c__Blastocatellia;o__Blastocatellales;f__Blastocatellaceae;g__Stenotrophobacter
ASV11089	0	0	0	0	0	4	0	0	0	0	0	0	0	0	0	221.9	0	0	0	0	0.001	44.38	15.4376	0.0625063	0.332325	d__Bacteria;p__Actinobacteria;c__Rubrobacteria;o__Gaiellales;f__Gaiellaceae;g__Gaiella;s__Gaiella occulta
ASV1109	17	0	0	0	0	0	0	0	0	0	753.05	0	0	0	0	0	0	0	0	0	150.61	0.001	-17.2005	0.000122181	0.00397117	d__Bacteria;p__Proteobacteria;c__Alphaproteobacteria;o__Rhodospirillales;f__Rhodospirillaceae;g__Dongia;s__Dongia mobilis
ASV11090	0	0	0	0	4	0	0	0	0	0	0	0	0	0	190.97	0	0	0	0	0	38.194	0.001	-15.2211	0.00781469	0.0892477	d__Bacteria;p__Proteobacteria;c__Deltaproteobacteria;o__Desulfuromonadales;f__Geobacteraceae;g__Geomonas;s__Geomonas pelophila
ASV11091	0	0	0	0	4	0	0	0	0	0	0	0	0	0	190.97	0	0	0	0	0	38.194	0.001	-15.2211	0.00781469	0.0892477	d__Bacteria;p__Gemmatimonadetes;c__Gemmatimonadetes;o__Gemmatimonadales;f__Gemmatimonadaceae;g__Gemmatimonas;s__Gemmatimonas phototrophica
ASV11092	4	0	0	0	0	0	0	0	0	0	177.19	0	0	0	0	0	0	0	0	0	35.438	0.001	-15.113	0.125007	0.349364	d__Bacteria;p__Bacteroidetes;c__Chitinophagia;o__Chitinophagales;f__Chitinophagaceae;g__Paraflavitalea;s__Paraflavitalea soli
ASV11093	0	0	0	0	0	0	4	0	0	0	0	0	0	0	0	0	169.03	0	0	0	0.001	33.806	15.045	0.125007	0.349364	d__Bacteria;p__Chloroflexi;c__Thermomicrobia;o__Sphaerobacterales;f__Sphaerobacteraceae;g__Sphaerobacter;s__Sphaerobacter thermophilus
ASV11094	0	0	0	4	0	0	0	0	0	0	0	0	0	185.37	0	0	0	0	0	0	37.074	0.001	-15.1781	0.0625063	0.332325	d__Bacteria;p__Verrucomicrobia;c__Spartobacteria;o__Chthoniobacterales;f__Chthoniobacteraceae;g__Candidatus Udaeobacter;s__Udaeobacter sp003218615
ASV11095	0	0	0	0	0	0	4	0	0	0	0	0	0	0	0	0	169.03	0	0	0	0.001	33.806	15.045	0.125007	0.349364	d__Bacteria;p__Acidobacteria;c__Acidobacteriia;o__Bryobacterales;f__Solibacteraceae;g__Candidatus Solibacter;s__Solibacter usitatus
ASV11096	0	0	0	0	0	0	0	0	4	0	0	0	0	0	0	0	0	0	185.43	0	0.001	37.086	15.1786	0.0625063	0.332325	d__Bacteria;p__Chloroflexi;c__Ktedonobacteria;o__Ktedonobacterales;f__Ktedonobacteraceae;g__Ktedonobacter
ASV11097	0	0	4	0	0	0	0	0	0	0	0	0	168.72	0	0	0	0	0	0	0	33.744	0.001	-15.0423	0.250007	0.441558	d__Bacteria;p__Acidobacteria;c__Vicinamibacteria;o__norank;f__Vicinamibacteraceae;g__Luteitalea;s__Luteitalea pratensis
ASV11098	0	0	0	0	0	0	0	0	4	0	0	0	0	0	0	0	0	0	185.43	0	0.001	37.086	15.1786	0.0625063	0.332325	Unclassified
ASV11099	0	0	0	0	0	0	4	0	0	0	0	0	0	0	0	0	169.03	0	0	0	0.001	33.806	15.045	0.125007	0.349364	d__Bacteria;p__Proteobacteria;c__Alphaproteobacteria;o__Hyphomicrobiales;f__Reyranellaceae;g__Reyranella;s__uncultured bacterium
ASV111	0	0	0	0	72	0	0	0	0	0	0	0	0	0	3437.41	0	0	0	0	0	687.482	0.001	-19.391	5.08038e-38	6.89504e-35	d__Bacteria;p__Proteobacteria;c__Betaproteobacteria;o__Burkholderiales;f__norank;g__Mitsuaria;s__Mitsuaria sp001653795
ASV1110	0	0	0	17	0	0	0	0	0	0	0	0	0	787.84	0	0	0	0	0	0	157.568	0.001	-17.2656	7.64107e-06	0.000371087	d__Bacteria;p__Acidobacteria;c__Acidobacteriia;o__Acidobacteriales;f__Acidobacteriaceae;g__Candidatus Koribacter;s__uncultured bacterium
ASV11100	0	0	0	4	0	0	0	0	0	0	0	0	0	185.37	0	0	0	0	0	0	37.074	0.001	-15.1781	0.0625063	0.332325	d__Bacteria;p__Planctomycetes;c__Planctomycetia;o__Gemmatales;f__Gemmataceae;g__Fimbriiglobus;s__Fimbriiglobus ruber
ASV11101	0	0	0	0	0	0	0	0	4	0	0	0	0	0	0	0	0	0	185.43	0	0.001	37.086	15.1786	0.0625063	0.332325	d__Bacteria;p__Acidobacteria;c__Acidobacteriia;o__Acidobacteriales;f__Acidobacteriaceae;g__Terracidiphilus;s__Terracidiphilus sp903849645
ASV11102	0	0	0	0	0	0	4	0	0	0	0	0	0	0	0	0	169.03	0	0	0	0.001	33.806	15.045	0.125007	0.349364	d__Bacteria;p__Planctomycetes;c__Phycisphaerae;o__Tepidisphaerales;f__Tepidisphaeraceae;g__Tepidisphaera;s__uncultured bacterium
ASV11103	0	0	0	0	0	0	0	0	4	0	0	0	0	0	0	0	0	0	185.43	0	0.001	37.086	15.1786	0.0625063	0.332325	d__Bacteria;p__Acidobacteria;c__Acidobacteriia;o__Acidobacteriales;f__Acidobacteriaceae;g__Terracidiphilus;s__Terracidiphilus sp903849645
ASV11104	0	0	0	4	0	0	0	0	0	0	0	0	0	185.37	0	0	0	0	0	0	37.074	0.001	-15.1781	0.0625063	0.332325	d__Bacteria;p__Actinobacteria;c__Thermoleophilia;o__Solirubrobacterales;f__Conexibacteraceae;g__Conexibacter
ASV11105	0	0	0	0	4	0	0	0	0	0	0	0	0	0	190.97	0	0	0	0	0	38.194	0.001	-15.2211	0.00781469	0.0892477	d__Bacteria;p__Proteobacteria;c__Alphaproteobacteria;o__Hyphomicrobiales;f__Hyphomicrobiaceae;g__Methyloceanibacter;s__uncultured bacterium
ASV11106	0	0	0	0	0	0	0	0	4	0	0	0	0	0	0	0	0	0	185.43	0	0.001	37.086	15.1786	0.0625063	0.332325	d__Bacteria;p__Proteobacteria;c__Gammaproteobacteria;o__Cellvibrionales;f__Microbulbiferaceae;g__Microbulbifer;s__Microbulbifer thermotolerans
ASV11107	0	0	4	0	0	0	0	0	0	0	0	0	168.72	0	0	0	0	0	0	0	33.744	0.001	-15.0423	0.250007	0.441558	d__Bacteria;p__Elusimicrobia;c__Endomicrobia;o__Endomicrobiales;f__Endomicrobiaceae;g__Endomicrobium;s__Endomicrobium proavitum
ASV11108	0	0	0	0	0	0	4	0	0	0	0	0	0	0	0	0	169.03	0	0	0	0.001	33.806	15.045	0.125007	0.349364	d__Bacteria;p__Planctomycetes;c__Planctomycetia;o__Gemmatales;f__Gemmataceae;g__Gemmata;s__Gemmata massiliana
ASV11109	0	0	0	0	0	0	0	0	0	4	0	0	0	0	0	0	0	0	0	178.95	0.001	35.79	15.1273	0.250007	0.441558	d__Bacteria;p__Bacteroidetes;c__Cytophagia;o__Cytophagales;f__Fulvivirgaceae;g__Chryseolinea;s__Chryseolinea soli
ASV1111	0	0	17	0	0	0	0	0	0	0	0	0	717.06	0	0	0	0	0	0	0	143.412	0.001	-17.1298	0.0009771	0.0195951	d__Bacteria;p__Acidobacteria;c__Vicinamibacteria;o__norank;f__Vicinamibacteraceae;g__Luteitalea;s__uncultured bacterium
ASV11110	0	4	0	0	0	0	0	0	0	0	0	180.35	0	0	0	0	0	0	0	0	36.07	0.001	-15.1385	0.125007	0.349364	d__Bacteria;p__Acidobacteria;c__Acidobacteriia;o__Bryobacterales;f__Solibacteraceae;g__Candidatus Solibacter;s__Solibacter usitatus
ASV11111	0	0	0	3	0	0	0	0	0	0	0	0	0	139.03	0	0	0	0	0	0	27.806	0.001	-14.7631	0.250007	0.441558	d__Bacteria;p__Proteobacteria;c__Betaproteobacteria;o__Burkholderiales;f__Oxalobacteraceae;g__Pseudoduganella;s__Pseudoduganella sp009674485
ASV11112	0	0	0	0	3	0	0	0	0	0	0	0	0	0	143.23	0	0	0	0	0	28.646	0.001	-14.806	0.0312547	0.205376	d__Bacteria;p__Proteobacteria;c__Deltaproteobacteria;o__Desulfuromonadales;f__Syntrophotaleaceae;g__Syntrophotalea;s__Syntrophotalea carbinolica
ASV11113	0	0	0	3	0	0	0	0	0	0	0	0	0	139.03	0	0	0	0	0	0	27.806	0.001	-14.7631	0.250007	0.441558	d__Bacteria;p__Acidobacteria;c__Acidobacteriia;o__Bryobacterales;f__Solibacteraceae;g__Candidatus Solibacter;s__Solibacter usitatus
ASV11114	0	0	0	0	0	0	0	0	0	3	0	0	0	0	0	0	0	0	0	134.21	0.001	26.842	14.7122	0.500005	0.551321	d__Bacteria;p__Actinobacteria;c__Thermoleophilia;o__Solirubrobacterales;f__Conexibacteraceae;g__Conexibacter;s__uncultured bacterium
ASV11115	0	0	0	0	0	0	3	0	0	0	0	0	0	0	0	0	126.77	0	0	0	0.001	25.354	14.6299	0.250007	0.441558	d__Bacteria;p__Proteobacteria;c__Betaproteobacteria;o__Burkholderiales;f__Burkholderiaceae;g__Cupriavidus;s__Cupriavidus taiwanensis_C
ASV11116	0	0	0	0	3	0	0	0	0	0	0	0	0	0	143.23	0	0	0	0	0	28.646	0.001	-14.806	0.0312547	0.205376	d__Bacteria;p__Acidobacteria;c__Acidobacteriia;o__Bryobacterales;f__Solibacteraceae;g__Candidatus Solibacter;s__Solibacter usitatus
ASV11117	0	3	0	0	0	0	0	0	0	0	0	135.26	0	0	0	0	0	0	0	0	27.052	0.001	-14.7234	0.250007	0.441558	d__Bacteria;p__Bacteroidetes;c__Sphingobacteriia;o__Sphingobacteriales;f__Sphingobacteriaceae;g__Mucilaginibacter;s__Mucilaginibacter ginsenosidivorans
ASV11118	0	3	0	0	0	0	0	0	0	0	0	135.26	0	0	0	0	0	0	0	0	27.052	0.001	-14.7234	0.250007	0.441558	d__Bacteria;p__Proteobacteria;c__Deltaproteobacteria;o__Myxococcales;f__Anaeromyxobacteraceae;g__Anaeromyxobacter;s__Anaeromyxobacter dehalogenans
ASV11119	0	0	0	0	0	0	3	0	0	0	0	0	0	0	0	0	126.77	0	0	0	0.001	25.354	14.6299	0.250007	0.441558	d__Bacteria;p__Proteobacteria;c__Betaproteobacteria;o__Burkholderiales;f__Burkholderiaceae;g__Paraburkholderia;s__Paraburkholderia sp013426895
ASV1112	0	0	0	0	0	0	17	0	0	0	0	0	0	0	0	0	718.39	0	0	0	0.001	143.678	17.1325	7.64107e-06	0.000371087	d__Bacteria;p__Actinobacteria;c__Rubrobacteria;o__Gaiellales;f__Gaiellaceae;g__Gaiella;s__Gaiella occulta
ASV11120	0	0	0	0	0	0	0	0	0	3	0	0	0	0	0	0	0	0	0	134.21	0.001	26.842	14.7122	0.500005	0.551321	d__Bacteria;p__Proteobacteria;c__Betaproteobacteria;o__Neisseriales;f__Chromobacteriaceae;g__Aquitalea;s__Aquitalea sp005155025
ASV11121	0	0	0	3	0	0	0	0	0	0	0	0	0	139.03	0	0	0	0	0	0	27.806	0.001	-14.7631	0.250007	0.441558	d__Bacteria;p__Bacteroidetes;c__Chitinophagia;o__Chitinophagales;f__Chitinophagaceae;g__Pseudobacter;s__Pseudobacter ginsenosidimutans
ASV11122	0	0	0	0	0	0	0	3	0	0	0	0	0	0	0	0	0	693	0	0	0.001	138.6	17.0806	1	1	d__Bacteria;p__Planctomycetes;c__Phycisphaerae;o__Sedimentisphaerales;f__Anaerohalosphaeraceae;g__Anaerohalosphaera;s__Anaerohalosphaera lusitana
ASV11123	0	0	0	0	0	0	0	0	3	0	0	0	0	0	0	0	0	0	139.08	0	0.001	27.816	14.7636	0.125007	0.349364	d__Bacteria;p__Proteobacteria;c__Betaproteobacteria;o__Burkholderiales;f__Oxalobacteraceae;g__Pseudoduganella;s__Pseudoduganella albidiflava
ASV11124	0	0	0	0	0	0	0	0	3	0	0	0	0	0	0	0	0	0	139.08	0	0.001	27.816	14.7636	0.125007	0.349364	d__Bacteria;p__Acidobacteria;c__Vicinamibacteria;o__norank;f__Vicinamibacteraceae;g__Luteitalea;s__uncultured bacterium
ASV11125	0	0	0	0	0	0	3	0	0	0	0	0	0	0	0	0	126.77	0	0	0	0.001	25.354	14.6299	0.250007	0.441558	d__Bacteria;p__Bacteroidetes;c__Saprospiria;o__Saprospirales;f__Haliscomenobacteraceae;g__Phaeodactylibacter;s__uncultured bacterium
ASV11126	0	0	0	0	3	0	0	0	0	0	0	0	0	0	143.23	0	0	0	0	0	28.646	0.001	-14.806	0.0312547	0.205376	d__Bacteria;p__Proteobacteria;c__Betaproteobacteria;o__Burkholderiales;f__norank;g__Mitsuaria;s__Mitsuaria sp001653795
ASV11127	3	0	0	0	0	0	0	0	0	0	132.89	0	0	0	0	0	0	0	0	0	26.578	0.001	-14.6979	0.250007	0.441558	d__Bacteria;p__Planctomycetes;c__Planctomycetia;o__Pirellulales;f__Pirellulaceae;g__Rubripirellula;s__Rubripirellula sp002689655
ASV11128	0	0	0	0	3	0	0	0	0	0	0	0	0	0	143.23	0	0	0	0	0	28.646	0.001	-14.806	0.0312547	0.205376	d__Bacteria;p__Proteobacteria;c__Alphaproteobacteria;o__Rhodospirillales;f__Rhodospirillaceae;g__Hypericibacter;s__Hypericibacter adhaerens
ASV11129	0	0	0	0	0	3	0	0	0	0	0	0	0	0	0	166.43	0	0	0	0	0.001	33.286	15.0226	0.125007	0.349364	d__Bacteria;p__Proteobacteria;c__Oligoflexia;o__Bacteriovoracales;f__Bacteriovoracaceae;g__Peredibacter;s__uncultured delta proteobacterium
ASV1113	0	0	0	17	0	0	0	0	0	0	0	0	0	787.84	0	0	0	0	0	0	157.568	0.001	-17.2656	7.64107e-06	0.000371087	d__Bacteria;p__Bacteroidetes;c__Sphingobacteriia;o__Sphingobacteriales;f__Sphingobacteriaceae;g__Mucilaginibacter;s__Mucilaginibacter sp013288235
ASV11130	0	0	3	0	0	0	0	0	0	0	0	0	126.54	0	0	0	0	0	0	0	25.308	0.001	-14.6273	0.500005	0.551321	d__Bacteria;p__Acidobacteria;c__Acidobacteriia;o__Acidobacteriales;f__Acidobacteriaceae;g__Candidatus Koribacter;s__uncultured bacterium
ASV11131	0	0	0	0	0	0	3	0	0	0	0	0	0	0	0	0	126.77	0	0	0	0.001	25.354	14.6299	0.250007	0.441558	d__Bacteria;p__Actinobacteria;c__Rubrobacteria;o__Gaiellales;f__Gaiellaceae;g__Gaiella;s__Gaiella occulta
ASV11132	0	0	0	0	3	0	0	0	0	0	0	0	0	0	143.23	0	0	0	0	0	28.646	0.001	-14.806	0.0312547	0.205376	d__Bacteria;p__Actinobacteria;c__Rubrobacteria;o__Gaiellales;f__Gaiellaceae;g__Gaiella;s__Gaiella occulta
ASV11133	0	3	0	0	0	0	0	0	0	0	0	135.26	0	0	0	0	0	0	0	0	27.052	0.001	-14.7234	0.250007	0.441558	d__Bacteria;p__Proteobacteria;c__Alphaproteobacteria;o__Hyphomicrobiales;f__norank;g__Pseudorhodoplanes;s__Pseudorhodoplanes sinuspersici
ASV11134	0	0	0	0	0	0	0	0	3	0	0	0	0	0	0	0	0	0	139.08	0	0.001	27.816	14.7636	0.125007	0.349364	d__Bacteria;p__Acidobacteria;c__Acidobacteriia;o__Acidobacteriales;f__Acidobacteriaceae;g__Candidatus Koribacter;s__uncultured bacterium
ASV11135	0	0	0	0	0	0	0	0	3	0	0	0	0	0	0	0	0	0	139.08	0	0.001	27.816	14.7636	0.125007	0.349364	d__Bacteria;p__Acidobacteria;c__Acidobacteriia;o__Acidobacteriales;f__Acidobacteriaceae;g__Candidatus Koribacter;s__uncultured bacterium
ASV11136	3	0	0	0	0	0	0	0	0	0	132.89	0	0	0	0	0	0	0	0	0	26.578	0.001	-14.6979	0.250007	0.441558	d__Bacteria;p__Proteobacteria;c__Deltaproteobacteria;o__Myxococcales;f__Anaeromyxobacteraceae;g__Anaeromyxobacter;s__Anaeromyxobacter dehalogenans
ASV11137	0	0	0	0	3	0	0	0	0	0	0	0	0	0	143.23	0	0	0	0	0	28.646	0.001	-14.806	0.0312547	0.205376	d__Bacteria;p__Proteobacteria;c__Alphaproteobacteria;o__Caulobacterales;f__Caulobacteraceae;g__Caulobacter;s__Caulobacter henricii
ASV11138	0	0	0	3	0	0	0	0	0	0	0	0	0	139.03	0	0	0	0	0	0	27.806	0.001	-14.7631	0.250007	0.441558	d__Bacteria;p__Acidobacteria;c__Acidobacteriia;o__Acidobacteriales;f__Acidobacteriaceae;g__Candidatus Koribacter;s__uncultured bacterium
ASV11139	0	0	0	0	0	0	0	0	0	3	0	0	0	0	0	0	0	0	0	134.21	0.001	26.842	14.7122	0.500005	0.551321	d__Bacteria;p__Proteobacteria;c__Deltaproteobacteria;o__Myxococcales;f__Labilitrichaceae;g__Labilithrix;s__Labilithrix luteola
ASV1114	17	0	0	0	0	0	0	0	0	0	753.05	0	0	0	0	0	0	0	0	0	150.61	0.001	-17.2005	0.000122181	0.00397117	d__Bacteria;p__Proteobacteria;c__Betaproteobacteria;o__Burkholderiales;f__Oxalobacteraceae;g__Pseudoduganella;s__Pseudoduganella sp001425005
ASV11140	3	0	0	0	0	0	0	0	0	0	132.89	0	0	0	0	0	0	0	0	0	26.578	0.001	-14.6979	0.250007	0.441558	d__Bacteria;p__Proteobacteria;c__Deltaproteobacteria;o__Desulfuromonadales;f__Syntrophotaleaceae;g__Syntrophotalea;s__Syntrophotalea acetylenica
ASV11141	0	3	0	0	0	0	0	0	0	0	0	135.26	0	0	0	0	0	0	0	0	27.052	0.001	-14.7234	0.250007	0.441558	d__Bacteria;p__Proteobacteria;c__Betaproteobacteria;o__Burkholderiales;f__Oxalobacteraceae;g__Collimonas;s__Collimonas fungivorans_A
ASV11142	0	0	0	0	3	0	0	0	0	0	0	0	0	0	143.23	0	0	0	0	0	28.646	0.001	-14.806	0.0312547	0.205376	d__Bacteria;p__Proteobacteria;c__Gammaproteobacteria;o__norank;f__norank;g__Acidibacter;s__uncultured gamma proteobacterium
ASV11143	0	0	0	0	0	0	0	0	0	3	0	0	0	0	0	0	0	0	0	134.21	0.001	26.842	14.7122	0.500005	0.551321	d__Bacteria;p__Acidobacteria;c__Acidobacteriia;o__Acidobacteriales;f__Acidobacteriaceae
ASV11144	0	0	0	0	3	0	0	0	0	0	0	0	0	0	143.23	0	0	0	0	0	28.646	0.001	-14.806	0.0312547	0.205376	d__Bacteria;p__Acidobacteria;c__Acidobacteriia;o__Acidobacteriales;f__Acidobacteriaceae;g__Granulicella
ASV11145	0	0	0	0	0	0	0	0	0	3	0	0	0	0	0	0	0	0	0	134.21	0.001	26.842	14.7122	0.500005	0.551321	d__Bacteria;p__Planctomycetes;c__Planctomycetia;o__Pirellulales;f__Pirellulaceae;g__Pirellula;s__uncultured Planctomycetales bacterium
ASV11146	0	0	0	0	0	0	3	0	0	0	0	0	0	0	0	0	126.77	0	0	0	0.001	25.354	14.6299	0.250007	0.441558	d__Bacteria;p__Acidobacteria;c__Acidobacteriia;o__Acidobacteriales;f__Acidobacteriaceae;g__Candidatus Koribacter;s__uncultured bacterium
ASV11147	0	0	0	0	0	0	0	0	0	3	0	0	0	0	0	0	0	0	0	134.21	0.001	26.842	14.7122	0.500005	0.551321	d__Bacteria;p__Bacteroidetes;c__Chitinophagia;o__Chitinophagales;f__Chitinophagaceae;g__Puia;s__uncultured bacterium
ASV11148	0	0	0	0	0	3	0	0	0	0	0	0	0	0	0	166.43	0	0	0	0	0.001	33.286	15.0226	0.125007	0.349364	d__Bacteria;p__Proteobacteria;c__Betaproteobacteria;o__Neisseriales;f__Chromobacteriaceae;g__Aquitalea;s__Aquitalea denitrificans
ASV11149	0	0	0	0	0	0	0	0	3	0	0	0	0	0	0	0	0	0	139.08	0	0.001	27.816	14.7636	0.125007	0.349364	d__Bacteria;p__Proteobacteria;c__Betaproteobacteria;o__Burkholderiales;f__Burkholderiaceae;g__Paraburkholderia;s__Paraburkholderia sp013426895
ASV1115	0	0	17	0	0	0	0	0	0	0	0	0	717.06	0	0	0	0	0	0	0	143.412	0.001	-17.1298	0.0009771	0.0195951	d__Bacteria;p__Proteobacteria;c__Gammaproteobacteria;o__norank;f__norank;g__Acidibacter;s__uncultured bacterium
ASV11150	0	0	0	3	0	0	0	0	0	0	0	0	0	139.03	0	0	0	0	0	0	27.806	0.001	-14.7631	0.250007	0.441558	d__Bacteria;p__Acidobacteria;c__Acidobacteriia;o__Acidobacteriales;f__Acidobacteriaceae;g__Granulicella;s__uncultured bacterium
ASV11151	0	3	0	0	0	0	0	0	0	0	0	135.26	0	0	0	0	0	0	0	0	27.052	0.001	-14.7234	0.250007	0.441558	d__Bacteria;p__Acidobacteria;c__Acidobacteriia;o__Acidobacteriales;f__Acidobacteriaceae;g__Candidatus Koribacter;s__uncultured bacterium
ASV11152	0	0	0	0	3	0	0	0	0	0	0	0	0	0	143.23	0	0	0	0	0	28.646	0.001	-14.806	0.0312547	0.205376	d__Bacteria;p__Proteobacteria;c__Deltaproteobacteria;o__Myxococcales;f__Labilitrichaceae;g__Labilithrix;s__Labilithrix luteola
ASV11153	3	0	0	0	0	0	0	0	0	0	132.89	0	0	0	0	0	0	0	0	0	26.578	0.001	-14.6979	0.250007	0.441558	d__Bacteria;p__Acidobacteria;c__Acidobacteriia;o__Acidobacteriales;f__Acidobacteriaceae;g__Candidatus Koribacter;s__uncultured bacterium
ASV11154	0	0	0	0	3	0	0	0	0	0	0	0	0	0	143.23	0	0	0	0	0	28.646	0.001	-14.806	0.0312547	0.205376	d__Bacteria;p__Proteobacteria;c__Betaproteobacteria;o__Burkholderiales;f__Oxalobacteraceae;g__Pseudoduganella;s__Pseudoduganella sp009674485
ASV11155	0	3	0	0	0	0	0	0	0	0	0	135.26	0	0	0	0	0	0	0	0	27.052	0.001	-14.7234	0.250007	0.441558	d__Bacteria;p__Verrucomicrobia;c__Spartobacteria;o__Chthoniobacterales;f__Chthoniobacteraceae;g__Chthoniobacter;s__Chthoniobacter flavus
ASV11156	0	0	0	0	3	0	0	0	0	0	0	0	0	0	143.23	0	0	0	0	0	28.646	0.001	-14.806	0.0312547	0.205376	d__Bacteria;p__Verrucomicrobia;c__Verrucomicrobiae;o__Verrucomicrobiales;f__Verrucomicrobia subdivision 3;g__Pedosphaera;s__Pedosphaera parvula
ASV11157	0	0	0	0	0	0	3	0	0	0	0	0	0	0	0	0	126.77	0	0	0	0.001	25.354	14.6299	0.250007	0.441558	d__Bacteria;p__Proteobacteria;c__Betaproteobacteria;o__Nitrosomonadales;f__Nitrosomonadaceae;g__Nitrosospira;s__Nitrosospira multiformis
ASV11158	3	0	0	0	0	0	0	0	0	0	132.89	0	0	0	0	0	0	0	0	0	26.578	0.001	-14.6979	0.250007	0.441558	d__Bacteria;p__Planctomycetes;c__Planctomycetia;o__Gemmatales;f__Gemmataceae;g__Fimbriiglobus;s__Fimbriiglobus ruber
ASV11159	0	0	0	0	0	0	0	0	3	0	0	0	0	0	0	0	0	0	139.08	0	0.001	27.816	14.7636	0.125007	0.349364	d__Bacteria;p__Proteobacteria;c__Betaproteobacteria;o__Burkholderiales;f__norank;g__Rubrivivax;s__Rubrivivax benzoatilyticus
ASV1116	17	0	0	0	0	0	0	0	0	0	753.05	0	0	0	0	0	0	0	0	0	150.61	0.001	-17.2005	0.000122181	0.00397117	d__Bacteria;p__Proteobacteria;c__Alphaproteobacteria;o__Hyphomicrobiales;f__Bradyrhizobiaceae;g__Bradyrhizobium;s__Bradyrhizobium canariense_A
ASV11160	0	0	0	0	0	0	3	0	0	0	0	0	0	0	0	0	126.77	0	0	0	0.001	25.354	14.6299	0.250007	0.441558	d__Bacteria;p__Actinobacteria;c__Rubrobacteria;o__Gaiellales;f__Gaiellaceae;g__Gaiella;s__Gaiella occulta
ASV11161	0	0	3	0	0	0	0	0	0	0	0	0	126.54	0	0	0	0	0	0	0	25.308	0.001	-14.6273	0.500005	0.551321	d__Bacteria;p__Acidobacteria;c__Acidobacteriia;o__Acidobacteriales;f__Acidobacteriaceae;g__Candidatus Koribacter;s__uncultured Acidobacteria bacterium
ASV11162	0	0	0	3	0	0	0	0	0	0	0	0	0	139.03	0	0	0	0	0	0	27.806	0.001	-14.7631	0.250007	0.441558	d__Bacteria;p__Proteobacteria;c__Betaproteobacteria;o__Burkholderiales;f__Burkholderiaceae;g__Paraburkholderia;s__Paraburkholderia terrae
ASV11163	0	3	0	0	0	0	0	0	0	0	0	135.26	0	0	0	0	0	0	0	0	27.052	0.001	-14.7234	0.250007	0.441558	d__Bacteria;p__Acidobacteria;c__Holophagae;o__Holophagales;f__Holophagaceae;g__Geothrix
ASV11164	0	3	0	0	0	0	0	0	0	0	0	135.26	0	0	0	0	0	0	0	0	27.052	0.001	-14.7234	0.250007	0.441558	d__Bacteria;p__Planctomycetes;c__Planctomycetia;o__Isosphaerales;f__Isosphaeraceae;g__Aquisphaera;s__Aquisphaera giovannonii
ASV11165	0	0	0	0	0	3	0	0	0	0	0	0	0	0	0	166.43	0	0	0	0	0.001	33.286	15.0226	0.125007	0.349364	d__Bacteria;p__Bacteroidetes;c__Chitinophagia;o__Chitinophagales;f__Chitinophagaceae
ASV11166	0	0	3	0	0	0	0	0	0	0	0	0	126.54	0	0	0	0	0	0	0	25.308	0.001	-14.6273	0.500005	0.551321	d__Bacteria;p__Verrucomicrobia;c__Verrucomicrobiae;o__Verrucomicrobiales;f__Verrucomicrobia subdivision 3;g__Pedosphaera;s__uncultured bacterium
ASV11167	0	0	0	3	0	0	0	0	0	0	0	0	0	139.03	0	0	0	0	0	0	27.806	0.001	-14.7631	0.250007	0.441558	d__Bacteria;p__Planctomycetes;c__Phycisphaerae;o__Sedimentisphaerales;f__Anaerohalosphaeraceae;g__Anaerohalosphaera;s__Anaerohalosphaera lusitana
ASV11168	3	0	0	0	0	0	0	0	0	0	132.89	0	0	0	0	0	0	0	0	0	26.578	0.001	-14.6979	0.250007	0.441558	d__Bacteria;p__Proteobacteria;c__Betaproteobacteria;o__Burkholderiales;f__Comamonadaceae;g__Pelomonas
ASV11169	0	0	0	0	3	0	0	0	0	0	0	0	0	0	143.23	0	0	0	0	0	28.646	0.001	-14.806	0.0312547	0.205376	d__Bacteria;p__Proteobacteria;c__Gammaproteobacteria;o__norank;f__norank;g__Acidibacter;s__uncultured bacterium
ASV1117	0	0	0	0	0	0	0	0	17	0	0	0	0	0	0	0	0	0	788.1	0	0.001	157.62	17.2661	1.91098e-06	0.000112236	d__Bacteria;p__Candidatus Saccharibacteria;c__norank;o__norank;f__norank;g__Candidatus Saccharimonas;s__Saccharimonas aalborgensis
ASV11170	3	0	0	0	0	0	0	0	0	0	132.89	0	0	0	0	0	0	0	0	0	26.578	0.001	-14.6979	0.250007	0.441558	d__Bacteria;p__Proteobacteria;c__Alphaproteobacteria;o__Hyphomicrobiales;f__Xanthobacteraceae;g__Pseudolabrys;s__uncultured bacterium
ASV11171	0	0	0	0	0	0	3	0	0	0	0	0	0	0	0	0	126.77	0	0	0	0.001	25.354	14.6299	0.250007	0.441558	d__Bacteria;p__Acidobacteria;c__Vicinamibacteria;o__norank;f__Vicinamibacteraceae;g__Luteitalea;s__uncultured bacterium
ASV11172	0	0	0	0	3	0	0	0	0	0	0	0	0	0	143.23	0	0	0	0	0	28.646	0.001	-14.806	0.0312547	0.205376	d__Bacteria;p__Proteobacteria;c__Alphaproteobacteria;o__Hyphomicrobiales;f__Beijerinckiaceae;g__Methylocapsa;s__uncultured bacterium
ASV11173	3	0	0	0	0	0	0	0	0	0	132.89	0	0	0	0	0	0	0	0	0	26.578	0.001	-14.6979	0.250007	0.441558	d__Bacteria;p__Proteobacteria;c__Deltaproteobacteria;o__Myxococcales;f__Polyangiaceae;g__Sorangium;s__uncultured bacterium
ASV11174	0	0	0	3	0	0	0	0	0	0	0	0	0	139.03	0	0	0	0	0	0	27.806	0.001	-14.7631	0.250007	0.441558	d__Bacteria;p__Proteobacteria;c__Betaproteobacteria;o__Rhodocyclales;f__Zoogloeaceae;g__Azoarcus;s__Azoarcus indigens
ASV11175	0	3	0	0	0	0	0	0	0	0	0	135.26	0	0	0	0	0	0	0	0	27.052	0.001	-14.7234	0.250007	0.441558	d__Bacteria;p__Proteobacteria;c__Alphaproteobacteria;o__Micropepsales;f__Micropepsaceae;g__Rhizomicrobium;s__Rhizomicrobium sp013149165
ASV11176	0	0	3	0	0	0	0	0	0	0	0	0	126.54	0	0	0	0	0	0	0	25.308	0.001	-14.6273	0.500005	0.551321	d__Bacteria;p__Acidobacteria;c__Acidobacteriia;o__Acidobacteriales;f__Acidobacteriaceae;g__Granulicella
ASV11177	0	3	0	0	0	0	0	0	0	0	0	135.26	0	0	0	0	0	0	0	0	27.052	0.001	-14.7234	0.250007	0.441558	d__Bacteria;p__Acidobacteria;c__Vicinamibacteria;o__norank;f__Vicinamibacteraceae;g__Luteitalea;s__Luteitalea pratensis
ASV11178	0	0	0	0	0	0	3	0	0	0	0	0	0	0	0	0	126.77	0	0	0	0.001	25.354	14.6299	0.250007	0.441558	d__Bacteria;p__Acidobacteria;c__Vicinamibacteria;o__norank;f__Vicinamibacteraceae;g__Luteitalea
ASV11179	0	0	0	0	3	0	0	0	0	0	0	0	0	0	143.23	0	0	0	0	0	28.646	0.001	-14.806	0.0312547	0.205376	d__Bacteria;p__Cyanobacteria;c__norank;o__Nostocales;f__Aphanizomenonaceae;g__Dolichospermum;s__Dolichospermum flosaquae
ASV1118	0	0	0	17	0	0	0	0	0	0	0	0	0	787.84	0	0	0	0	0	0	157.568	0.001	-17.2656	7.64107e-06	0.000371087	Unclassified
ASV11180	0	3	0	0	0	0	0	0	0	0	0	135.26	0	0	0	0	0	0	0	0	27.052	0.001	-14.7234	0.250007	0.441558	d__Bacteria;p__Proteobacteria;c__Alphaproteobacteria;o__Rhodospirillales;f__Stellaceae;g__Stella;s__Stella humosa
ASV11181	3	0	0	0	0	0	0	0	0	0	132.89	0	0	0	0	0	0	0	0	0	26.578	0.001	-14.6979	0.250007	0.441558	d__Bacteria;p__Acidobacteria;c__Vicinamibacteria;o__norank;f__Vicinamibacteraceae;g__Vicinamibacter
ASV11182	0	0	0	0	0	3	0	0	0	0	0	0	0	0	0	166.43	0	0	0	0	0.001	33.286	15.0226	0.125007	0.349364	d__Bacteria;p__Acidobacteria;c__Acidobacteriia;o__Acidobacteriales;f__Acidobacteriaceae
ASV11183	0	0	0	0	0	0	0	0	3	0	0	0	0	0	0	0	0	0	139.08	0	0.001	27.816	14.7636	0.125007	0.349364	d__Bacteria;p__Proteobacteria;c__Gammaproteobacteria;o__Pseudomonadales;f__Pseudomonadaceae;g__Pseudomonas;s__Pseudomonas putida
ASV11184	0	0	0	0	0	0	0	0	0	3	0	0	0	0	0	0	0	0	0	134.21	0.001	26.842	14.7122	0.500005	0.551321	d__Bacteria;p__Chloroflexi;c__Ktedonobacteria;o__Ktedonobacterales;f__Ktedonobacteraceae;g__Ktedonobacter;s__Ktedonobacter racemifer
ASV11185	0	0	0	0	3	0	0	0	0	0	0	0	0	0	143.23	0	0	0	0	0	28.646	0.001	-14.806	0.0312547	0.205376	d__Bacteria;p__Proteobacteria;c__Betaproteobacteria;o__Burkholderiales;f__Oxalobacteraceae;g__Massilia;s__uncultured bacterium
ASV11186	3	0	0	0	0	0	0	0	0	0	132.89	0	0	0	0	0	0	0	0	0	26.578	0.001	-14.6979	0.250007	0.441558	d__Bacteria;p__Proteobacteria;c__Alphaproteobacteria;o__Rhodospirillales;f__Stellaceae;g__Stella;s__Stella vacuolata
ASV11187	3	0	0	0	0	0	0	0	0	0	132.89	0	0	0	0	0	0	0	0	0	26.578	0.001	-14.6979	0.250007	0.441558	d__Bacteria;p__Acidobacteria;c__Acidobacteriia;o__Acidobacteriales;f__Acidobacteriaceae;g__Terriglobus;s__Terriglobus sp. TAA 43
ASV11188	0	0	3	0	0	0	0	0	0	0	0	0	126.54	0	0	0	0	0	0	0	25.308	0.001	-14.6273	0.500005	0.551321	d__Bacteria;p__Acidobacteria;c__Acidobacteriia;o__Acidobacteriales;f__Acidobacteriaceae;g__Candidatus Koribacter
ASV11189	0	0	3	0	0	0	0	0	0	0	0	0	126.54	0	0	0	0	0	0	0	25.308	0.001	-14.6273	0.500005	0.551321	d__Bacteria;p__Planctomycetes;c__Phycisphaerae;o__Tepidisphaerales;f__Tepidisphaeraceae;g__Tepidisphaera;s__Tepidisphaera mucosa
ASV1119	0	0	0	0	17	0	0	0	0	0	0	0	0	0	811.61	0	0	0	0	0	162.322	0.001	-17.3085	1.87076e-09	2.33687e-07	d__Bacteria;p__Proteobacteria;c__Alphaproteobacteria;o__Hyphomicrobiales;f__Reyranellaceae;g__Reyranella
ASV11190	0	0	0	0	0	0	3	0	0	0	0	0	0	0	0	0	126.77	0	0	0	0.001	25.354	14.6299	0.250007	0.441558	d__Bacteria;p__Acidobacteria;c__Acidobacteriia;o__Bryobacterales;f__Solibacteraceae;g__Candidatus Solibacter;s__Solibacter usitatus
ASV11191	0	3	0	0	0	0	0	0	0	0	0	135.26	0	0	0	0	0	0	0	0	27.052	0.001	-14.7234	0.250007	0.441558	d__Bacteria;p__Proteobacteria;c__Gammaproteobacteria;o__Legionellales;f__Coxiellaceae;g__Coxiella;s__Coxiella burnetii
ASV11192	3	0	0	0	0	0	0	0	0	0	132.89	0	0	0	0	0	0	0	0	0	26.578	0.001	-14.6979	0.250007	0.441558	d__Bacteria;p__Acidobacteria;c__Vicinamibacteria;o__norank;f__Vicinamibacteraceae;g__Luteitalea;s__Luteitalea pratensis
ASV11193	0	0	0	0	0	0	0	0	0	3	0	0	0	0	0	0	0	0	0	134.21	0.001	26.842	14.7122	0.500005	0.551321	d__Bacteria;p__Gemmatimonadetes;c__Gemmatimonadetes;o__Gemmatimonadales;f__Gemmatimonadaceae;g__Gemmatirosa;s__Gemmatirosa kalamazoonesis
ASV11194	0	0	0	0	0	3	0	0	0	0	0	0	0	0	0	166.43	0	0	0	0	0.001	33.286	15.0226	0.125007	0.349364	d__Bacteria;p__Proteobacteria;c__Alphaproteobacteria;o__Hyphomicrobiales;f__Devosiaceae;g__Youhaiella;s__Youhaiella tibetensis
ASV11195	3	0	0	0	0	0	0	0	0	0	132.89	0	0	0	0	0	0	0	0	0	26.578	0.001	-14.6979	0.250007	0.441558	d__Bacteria;p__Elusimicrobia;c__Endomicrobia;o__Endomicrobiales;f__Endomicrobiaceae;g__Endomicrobium;s__Endomicrobium proavitum
ASV11196	0	0	0	0	0	0	3	0	0	0	0	0	0	0	0	0	126.77	0	0	0	0.001	25.354	14.6299	0.250007	0.441558	d__Bacteria;p__Proteobacteria;c__Alphaproteobacteria;o__Hyphomicrobiales;f__norank;g__Pseudorhodoplanes;s__Pseudorhodoplanes sinuspersici
ASV11197	0	3	0	0	0	0	0	0	0	0	0	135.26	0	0	0	0	0	0	0	0	27.052	0.001	-14.7234	0.250007	0.441558	d__Bacteria;p__Acidobacteria;c__Acidobacteriia;o__Acidobacteriales;f__Acidobacteriaceae;g__Occallatibacter;s__uncultured Acidobacteria bacterium
ASV11198	3	0	0	0	0	0	0	0	0	0	132.89	0	0	0	0	0	0	0	0	0	26.578	0.001	-14.6979	0.250007	0.441558	d__Bacteria;p__Acidobacteria;c__Acidobacteriia;o__Acidobacteriales;f__Acidobacteriaceae;g__Edaphobacter
ASV11199	0	0	0	0	0	0	0	0	0	3	0	0	0	0	0	0	0	0	0	134.21	0.001	26.842	14.7122	0.500005	0.551321	Unclassified
ASV112	0	0	71	0	0	0	0	0	0	0	0	0	2994.77	0	0	0	0	0	0	0	598.954	0.001	-19.1921	1.43652e-14	4.07551e-12	d__Bacteria;p__Proteobacteria;c__Alphaproteobacteria;o__Sphingomonadales;f__Sphingomonadaceae;g__Novosphingobium;s__Novosphingobium sp003208375
ASV1120	0	0	17	0	0	0	0	0	0	0	0	0	717.06	0	0	0	0	0	0	0	143.412	0.001	-17.1298	0.0009771	0.0195951	d__Bacteria;p__Proteobacteria;c__Alphaproteobacteria;o__Hyphomicrobiales;f__Reyranellaceae;g__Reyranella
ASV11200	0	0	0	0	0	0	0	0	3	0	0	0	0	0	0	0	0	0	139.08	0	0.001	27.816	14.7636	0.125007	0.349364	d__Bacteria;p__Proteobacteria;c__Deltaproteobacteria;o__Desulfuromonadales;f__Syntrophotaleaceae;g__Syntrophotalea;s__Syntrophotalea carbinolica
ASV11201	0	0	3	0	0	0	0	0	0	0	0	0	126.54	0	0	0	0	0	0	0	25.308	0.001	-14.6273	0.500005	0.551321	d__Bacteria;p__Acidobacteria;c__Acidobacteriia;o__Acidobacteriales;f__Acidobacteriaceae;g__Candidatus Koribacter;s__uncultured Acidobacteria bacterium
ASV11202	3	0	0	0	0	0	0	0	0	0	132.89	0	0	0	0	0	0	0	0	0	26.578	0.001	-14.6979	0.250007	0.441558	Unclassified
ASV11203	0	3	0	0	0	0	0	0	0	0	0	135.26	0	0	0	0	0	0	0	0	27.052	0.001	-14.7234	0.250007	0.441558	d__Bacteria;p__Proteobacteria;c__Gammaproteobacteria;o__norank;f__norank;g__Acidibacter;s__uncultured bacterium
ASV11204	0	0	0	0	0	0	0	0	0	3	0	0	0	0	0	0	0	0	0	134.21	0.001	26.842	14.7122	0.500005	0.551321	Unclassified
ASV11205	0	0	0	0	3	0	0	0	0	0	0	0	0	0	143.23	0	0	0	0	0	28.646	0.001	-14.806	0.0312547	0.205376	d__Bacteria;p__Verrucomicrobia;c__Opitutae;o__Opitutales;f__Opitutaceae;g__Lacunisphaera;s__metagenome
ASV11206	0	0	0	0	0	0	0	0	3	0	0	0	0	0	0	0	0	0	139.08	0	0.001	27.816	14.7636	0.125007	0.349364	d__Bacteria;p__Proteobacteria;c__Alphaproteobacteria;o__Hyphomicrobiales;f__norank;g__Pseudorhodoplanes;s__Pseudorhodoplanes sinuspersici
ASV11207	3	0	0	0	0	0	0	0	0	0	132.89	0	0	0	0	0	0	0	0	0	26.578	0.001	-14.6979	0.250007	0.441558	d__Bacteria;p__Proteobacteria;c__Gammaproteobacteria;o__Pseudomonadales;f__Pseudomonadaceae;g__Pseudomonas;s__Pseudomonas putida
ASV11208	3	0	0	0	0	0	0	0	0	0	132.89	0	0	0	0	0	0	0	0	0	26.578	0.001	-14.6979	0.250007	0.441558	d__Bacteria;p__Proteobacteria;c__Gammaproteobacteria;o__Legionellales;f__Legionellaceae;g__Tatlockia;s__Tatlockia jamestowniensis
ASV11209	0	0	0	0	3	0	0	0	0	0	0	0	0	0	143.23	0	0	0	0	0	28.646	0.001	-14.806	0.0312547	0.205376	d__Bacteria;p__Actinobacteria;c__Acidimicrobiia;o__Acidimicrobiales;f__Acidimicrobiaceae;g__Acidithrix;s__Acidithrix ferrooxidans
ASV1121	0	0	0	0	0	17	0	0	0	0	0	0	0	0	0	943.08	0	0	0	0	0.001	188.616	17.5251	1.91098e-06	0.000112236	d__Bacteria;p__Acidobacteria;c__Acidobacteriia;o__Acidobacteriales;f__Acidobacteriaceae
ASV11210	3	0	0	0	0	0	0	0	0	0	132.89	0	0	0	0	0	0	0	0	0	26.578	0.001	-14.6979	0.250007	0.441558	d__Bacteria;p__Proteobacteria;c__Oligoflexia;o__Bdellovibrionales;f__Bdellovibrionaceae;g__Bdellovibrio;s__Bdellovibrio bacteriovorus
ASV11211	0	0	0	0	0	0	3	0	0	0	0	0	0	0	0	0	126.77	0	0	0	0.001	25.354	14.6299	0.250007	0.441558	d__Bacteria;p__Verrucomicrobia;c__Spartobacteria;o__Chthoniobacterales;f__Chthoniobacteraceae;g__Chthoniobacter;s__Chthoniobacter flavus
ASV11212	0	0	0	0	3	0	0	0	0	0	0	0	0	0	143.23	0	0	0	0	0	28.646	0.001	-14.806	0.0312547	0.205376	d__Bacteria;p__Acidobacteria;c__Acidobacteriia;o__Bryobacterales;f__Solibacteraceae;g__Candidatus Solibacter;s__Solibacter usitatus
ASV11213	0	0	0	0	0	0	0	0	0	3	0	0	0	0	0	0	0	0	0	134.21	0.001	26.842	14.7122	0.500005	0.551321	d__Bacteria;p__Proteobacteria;c__Deltaproteobacteria;o__Desulfuromonadales;f__Geobacteraceae;g__Geomonas;s__Geomonas pelophila
ASV11214	0	0	3	0	0	0	0	0	0	0	0	0	126.54	0	0	0	0	0	0	0	25.308	0.001	-14.6273	0.500005	0.551321	d__Bacteria;p__Proteobacteria;c__Gammaproteobacteria;o__Nevskiales;f__Steroidobacteraceae;g__Povalibacter;s__Povalibacter uvarum
ASV11215	0	0	0	0	0	3	0	0	0	0	0	0	0	0	0	166.43	0	0	0	0	0.001	33.286	15.0226	0.125007	0.349364	d__Bacteria;p__Proteobacteria;c__Deltaproteobacteria;o__Desulfuromonadales;f__Geobacteraceae;g__Geomonas;s__Geomonas sp000023645
ASV11216	0	3	0	0	0	0	0	0	0	0	0	135.26	0	0	0	0	0	0	0	0	27.052	0.001	-14.7234	0.250007	0.441558	d__Bacteria;p__Proteobacteria;c__Alphaproteobacteria;o__Rhodospirillales;f__Stellaceae;g__Stella;s__Stella vacuolata
ASV11217	0	0	0	0	0	0	0	0	3	0	0	0	0	0	0	0	0	0	139.08	0	0.001	27.816	14.7636	0.125007	0.349364	d__Bacteria;p__Bacteroidetes;c__Chitinophagia;o__Chitinophagales;f__Chitinophagaceae;g__Paraflavitalea;s__Paraflavitalea soli
ASV11218	3	0	0	0	0	0	0	0	0	0	132.89	0	0	0	0	0	0	0	0	0	26.578	0.001	-14.6979	0.250007	0.441558	d__Bacteria;p__Gemmatimonadetes;c__Gemmatimonadetes;o__Gemmatimonadales;f__Gemmatimonadaceae;g__Gemmatirosa;s__Gemmatirosa kalamazoonesis
ASV11219	0	0	0	0	0	0	3	0	0	0	0	0	0	0	0	0	126.77	0	0	0	0.001	25.354	14.6299	0.250007	0.441558	d__Bacteria;p__Verrucomicrobia;c__Spartobacteria;o__Chthoniobacterales;f__Chthoniobacteraceae;g__Candidatus Udaeobacter;s__Udaeobacter sp003218615
ASV1122	0	0	0	0	0	0	0	0	0	17	0	0	0	0	0	0	0	0	0	760.52	0.001	152.104	17.2147	0.000244331	0.00670089	d__Bacteria;p__Planctomycetes;c__Planctomycetia;o__Gemmatales;f__Gemmataceae;g__Fimbriiglobus;s__Fimbriiglobus ruber
ASV11220	0	0	0	0	3	0	0	0	0	0	0	0	0	0	143.23	0	0	0	0	0	28.646	0.001	-14.806	0.0312547	0.205376	d__Bacteria;p__Proteobacteria;c__Alphaproteobacteria;o__Hyphomicrobiales;f__Bradyrhizobiaceae;g__Bradyrhizobium;s__Bradyrhizobium erythrophlei
ASV11221	3	0	0	0	0	0	0	0	0	0	132.89	0	0	0	0	0	0	0	0	0	26.578	0.001	-14.6979	0.250007	0.441558	d__Bacteria;p__Bacteroidetes;c__Bacteroidia;o__Bacteroidales;f__Dysgonomonadaceae;g__Proteiniphilum;s__Proteiniphilum sp012837345
ASV11222	0	0	0	0	0	0	3	0	0	0	0	0	0	0	0	0	126.77	0	0	0	0.001	25.354	14.6299	0.250007	0.441558	d__Bacteria;p__Proteobacteria;c__Betaproteobacteria;o__Rhodocyclales;f__Rhodocyclaceae;g__Denitromonas;s__Denitromonas halophilus
ASV11223	0	0	0	0	0	0	0	0	0	3	0	0	0	0	0	0	0	0	0	134.21	0.001	26.842	14.7122	0.500005	0.551321	d__Bacteria;p__Proteobacteria;c__Betaproteobacteria;o__Nitrosomonadales;f__Sterolibacteriaceae;g__Denitratisoma;s__Denitratisoma oestradiolicum
ASV11224	3	0	0	0	0	0	0	0	0	0	132.89	0	0	0	0	0	0	0	0	0	26.578	0.001	-14.6979	0.250007	0.441558	d__Bacteria;p__Verrucomicrobia;c__Verrucomicrobiae;o__Verrucomicrobiales;f__Verrucomicrobia subdivision 3;g__Pedosphaera;s__uncultured Verrucomicrobia bacterium
ASV11225	0	0	0	0	0	0	0	0	3	0	0	0	0	0	0	0	0	0	139.08	0	0.001	27.816	14.7636	0.125007	0.349364	d__Bacteria;p__Proteobacteria;c__Gammaproteobacteria;o__norank;f__norank;g__Acidibacter;s__uncultured bacterium
ASV11226	0	0	0	0	0	0	3	0	0	0	0	0	0	0	0	0	126.77	0	0	0	0.001	25.354	14.6299	0.250007	0.441558	d__Bacteria;p__Proteobacteria;c__Alphaproteobacteria;o__Rhodospirillales;f__Stellaceae;g__Stella;s__Stella humosa
ASV11227	3	0	0	0	0	0	0	0	0	0	132.89	0	0	0	0	0	0	0	0	0	26.578	0.001	-14.6979	0.250007	0.441558	d__Bacteria;p__Proteobacteria;c__Gammaproteobacteria;o__Methylococcales;f__Methylococcaceae;g__Methylomicrobium;s__uncultured prokaryote
ASV11228	0	0	0	0	3	0	0	0	0	0	0	0	0	0	143.23	0	0	0	0	0	28.646	0.001	-14.806	0.0312547	0.205376	d__Bacteria;p__Proteobacteria;c__Alphaproteobacteria;o__Rhodospirillales;f__Stellaceae;g__Stella;s__Stella vacuolata
ASV11229	3	0	0	0	0	0	0	0	0	0	132.89	0	0	0	0	0	0	0	0	0	26.578	0.001	-14.6979	0.250007	0.441558	d__Bacteria;p__Proteobacteria;c__Oligoflexia;o__Bdellovibrionales;f__Bdellovibrionaceae;g__Bdellovibrio;s__uncultured bacterium
ASV1123	0	0	0	17	0	0	0	0	0	0	0	0	0	787.84	0	0	0	0	0	0	157.568	0.001	-17.2656	7.64107e-06	0.000371087	d__Bacteria;p__Proteobacteria;c__Deltaproteobacteria;o__Syntrophobacterales;f__Syntrophaceae;g__Desulfomonile;s__uncultured bacterium
ASV11230	0	0	0	0	0	0	0	0	3	0	0	0	0	0	0	0	0	0	139.08	0	0.001	27.816	14.7636	0.125007	0.349364	d__Bacteria;p__Proteobacteria;c__Betaproteobacteria;o__Burkholderiales;f__Burkholderiaceae;g__Paraburkholderia;s__Paraburkholderia sp003002025
ASV11231	0	0	0	0	0	0	0	0	0	3	0	0	0	0	0	0	0	0	0	134.21	0.001	26.842	14.7122	0.500005	0.551321	d__Bacteria;p__Acidobacteria;c__Acidobacteriia;o__Acidobacteriales;f__Acidobacteriaceae;g__Candidatus Koribacter;s__uncultured bacterium
ASV11232	0	0	0	0	0	0	0	0	0	3	0	0	0	0	0	0	0	0	0	134.21	0.001	26.842	14.7122	0.500005	0.551321	d__Bacteria;p__Bacteroidetes;c__Flavobacteriia;o__Flavobacteriales;f__Flavobacteriaceae;g__Flavobacterium;s__Flavobacterium hibernum
ASV11233	0	0	0	0	3	0	0	0	0	0	0	0	0	0	143.23	0	0	0	0	0	28.646	0.001	-14.806	0.0312547	0.205376	d__Bacteria;p__Proteobacteria;c__Betaproteobacteria;o__Burkholderiales;f__Oxalobacteraceae;g__Duganella;s__Duganella sp003217375
ASV11234	0	0	0	3	0	0	0	0	0	0	0	0	0	139.03	0	0	0	0	0	0	27.806	0.001	-14.7631	0.250007	0.441558	d__Bacteria;p__Acidobacteria;c__Acidobacteriia;o__Acidobacteriales;f__Acidobacteriaceae;g__Candidatus Koribacter;s__uncultured Acidobacteria bacterium
ASV11235	0	0	0	0	3	0	0	0	0	0	0	0	0	0	143.23	0	0	0	0	0	28.646	0.001	-14.806	0.0312547	0.205376	d__Bacteria;p__Proteobacteria;c__Deltaproteobacteria;o__Myxococcales;f__Polyangiaceae
ASV11236	0	0	0	0	3	0	0	0	0	0	0	0	0	0	143.23	0	0	0	0	0	28.646	0.001	-14.806	0.0312547	0.205376	d__Bacteria;p__Firmicutes;c__Clostridia;o__Eubacteriales;f__Peptococcaceae;g__Desulfofundulus;s__Desulfofundulus kuznetsovii
ASV11237	0	0	0	0	3	0	0	0	0	0	0	0	0	0	143.23	0	0	0	0	0	28.646	0.001	-14.806	0.0312547	0.205376	d__Bacteria;p__Acidobacteria;c__Vicinamibacteria;o__norank;f__Vicinamibacteraceae;g__Luteitalea;s__uncultured bacterium
ASV11238	0	0	0	0	0	0	3	0	0	0	0	0	0	0	0	0	126.77	0	0	0	0.001	25.354	14.6299	0.250007	0.441558	d__Bacteria;p__Proteobacteria;c__Alphaproteobacteria;o__Hyphomicrobiales;f__Bradyrhizobiaceae;g__Bradyrhizobium;s__Bradyrhizobium elkanii_A
ASV11239	0	0	0	0	0	0	0	0	3	0	0	0	0	0	0	0	0	0	139.08	0	0.001	27.816	14.7636	0.125007	0.349364	d__Bacteria;p__Acidobacteria;c__Vicinamibacteria;o__norank;f__Vicinamibacteraceae;g__Luteitalea;s__uncultured bacterium
ASV1124	0	0	0	0	0	0	0	0	0	17	0	0	0	0	0	0	0	0	0	760.52	0.001	152.104	17.2147	0.000244331	0.00670089	d__Bacteria;p__Verrucomicrobia;c__Spartobacteria;o__Chthoniobacterales;f__Chthoniobacteraceae;g__Chthoniobacter;s__Chthoniobacter flavus
ASV11240	0	0	0	3	0	0	0	0	0	0	0	0	0	139.03	0	0	0	0	0	0	27.806	0.001	-14.7631	0.250007	0.441558	d__Bacteria;p__Firmicutes;c__Negativicutes;o__Selenomonadales;f__Sporomusaceae;g__Thermosinus;s__Thermosinus carboxydivorans
ASV11241	0	0	0	0	0	3	0	0	0	0	0	0	0	0	0	166.43	0	0	0	0	0.001	33.286	15.0226	0.125007	0.349364	d__Bacteria;p__Proteobacteria;c__Alphaproteobacteria;o__Hyphomicrobiales;f__Methylocystaceae;g__Methylosinus;s__Methylosinus sp009936375
ASV11242	0	3	0	0	0	0	0	0	0	0	0	135.26	0	0	0	0	0	0	0	0	27.052	0.001	-14.7234	0.250007	0.441558	d__Bacteria;p__Proteobacteria;c__Betaproteobacteria;o__Rhodocyclales;f__Zoogloeaceae;g__Azoarcus;s__Azoarcus indigens
ASV11243	0	0	0	0	0	0	3	0	0	0	0	0	0	0	0	0	126.77	0	0	0	0.001	25.354	14.6299	0.250007	0.441558	d__Bacteria;p__Planctomycetes;c__Planctomycetia;o__Gemmatales;f__Gemmataceae;g__Fimbriiglobus;s__Fimbriiglobus ruber
ASV11244	0	0	0	0	0	3	0	0	0	0	0	0	0	0	0	166.43	0	0	0	0	0.001	33.286	15.0226	0.125007	0.349364	d__Bacteria;p__Acidobacteria;c__Acidobacteriia;o__Acidobacteriales;f__Acidobacteriaceae;g__Candidatus Koribacter;s__uncultured bacterium
ASV11245	3	0	0	0	0	0	0	0	0	0	132.89	0	0	0	0	0	0	0	0	0	26.578	0.001	-14.6979	0.250007	0.441558	d__Bacteria;p__Bacteroidetes;c__Chitinophagia;o__Chitinophagales;f__Chitinophagaceae;g__Edaphobaculum;s__metagenome
ASV11246	0	0	0	3	0	0	0	0	0	0	0	0	0	139.03	0	0	0	0	0	0	27.806	0.001	-14.7631	0.250007	0.441558	d__Bacteria;p__Proteobacteria;c__Alphaproteobacteria;o__Hyphomicrobiales;f__Hyphomicrobiaceae;g__Hyphomicrobium;s__Hyphomicrobium sp000253295
ASV11247	3	0	0	0	0	0	0	0	0	0	132.89	0	0	0	0	0	0	0	0	0	26.578	0.001	-14.6979	0.250007	0.441558	d__Bacteria;p__Proteobacteria;c__Alphaproteobacteria;o__Hyphomicrobiales;f__Roseiarcaceae;g__Roseiarcus;s__uncultured bacterium
ASV11248	0	0	0	0	0	0	0	0	3	0	0	0	0	0	0	0	0	0	139.08	0	0.001	27.816	14.7636	0.125007	0.349364	d__Bacteria;p__Proteobacteria;c__Betaproteobacteria;o__Rhodocyclales;f__Rhodocyclaceae;g__Niveibacterium;s__Niveibacterium sp013184235
ASV11249	3	0	0	0	0	0	0	0	0	0	132.89	0	0	0	0	0	0	0	0	0	26.578	0.001	-14.6979	0.250007	0.441558	d__Bacteria;p__Proteobacteria;c__Alphaproteobacteria;o__Hyphomicrobiales;f__Bradyrhizobiaceae;g__Bradyrhizobium;s__Bradyrhizobium yuanmingense
ASV1125	0	0	0	17	0	0	0	0	0	0	0	0	0	787.84	0	0	0	0	0	0	157.568	0.001	-17.2656	7.64107e-06	0.000371087	d__Bacteria;p__Bacteroidetes;c__Sphingobacteriia;o__Sphingobacteriales;f__Sphingobacteriaceae;g__Mucilaginibacter;s__Mucilaginibacter ginsenosidivorans
ASV11250	3	0	0	0	0	0	0	0	0	0	132.89	0	0	0	0	0	0	0	0	0	26.578	0.001	-14.6979	0.250007	0.441558	d__Bacteria;p__Nitrospirae;c__Nitrospira;o__Nitrospirales;f__Nitrospiraceae;g__Candidatus Manganitrophus;s__Manganitrophus noduliformans
ASV11251	3	0	0	0	0	0	0	0	0	0	132.89	0	0	0	0	0	0	0	0	0	26.578	0.001	-14.6979	0.250007	0.441558	d__Bacteria;p__Planctomycetes;c__Planctomycetia;o__Pirellulales;f__Pirellulaceae;g__Pirellula;s__Pirellula staleyi
ASV11252	0	0	0	0	0	0	0	0	0	3	0	0	0	0	0	0	0	0	0	134.21	0.001	26.842	14.7122	0.500005	0.551321	d__Bacteria;p__Proteobacteria;c__Betaproteobacteria;o__Burkholderiales;f__Oxalobacteraceae;g__Massilia;s__Massilia sp001485665
ASV11253	0	3	0	0	0	0	0	0	0	0	0	135.26	0	0	0	0	0	0	0	0	27.052	0.001	-14.7234	0.250007	0.441558	d__Bacteria;p__Firmicutes;c__Clostridia;o__Eubacteriales;f__Clostridiaceae;g__Desnuesiella;s__Desnuesiella massiliensis
ASV11254	0	0	3	0	0	0	0	0	0	0	0	0	126.54	0	0	0	0	0	0	0	25.308	0.001	-14.6273	0.500005	0.551321	d__Bacteria;p__Proteobacteria;c__Alphaproteobacteria;o__Caulobacterales;f__Caulobacteraceae;g__Caulobacter;s__Caulobacter henricii_C
ASV11255	0	0	0	0	0	0	3	0	0	0	0	0	0	0	0	0	126.77	0	0	0	0.001	25.354	14.6299	0.250007	0.441558	d__Bacteria;p__Candidatus Melainabacteria;c__norank;o__Candidatus Obscuribacterales;f__norank;g__Candidatus Obscuribacter;s__Obscuribacter phosphatis
ASV11256	0	0	0	0	0	0	0	0	3	0	0	0	0	0	0	0	0	0	139.08	0	0.001	27.816	14.7636	0.125007	0.349364	d__Bacteria;p__Proteobacteria;c__Betaproteobacteria;o__Neisseriales;f__Chromobacteriaceae;g__Leeia;s__uncultured bacterium
ASV11257	3	0	0	0	0	0	0	0	0	0	132.89	0	0	0	0	0	0	0	0	0	26.578	0.001	-14.6979	0.250007	0.441558	Unclassified
ASV11258	0	0	0	0	0	0	3	0	0	0	0	0	0	0	0	0	126.77	0	0	0	0.001	25.354	14.6299	0.250007	0.441558	d__Bacteria;p__Planctomycetes;c__Planctomycetia;o__Gemmatales;f__Gemmataceae;g__Fimbriiglobus;s__Fimbriiglobus ruber
ASV11259	0	0	0	0	0	0	3	0	0	0	0	0	0	0	0	0	126.77	0	0	0	0.001	25.354	14.6299	0.250007	0.441558	d__Bacteria;p__Proteobacteria;c__Alphaproteobacteria;o__Hyphomicrobiales;f__Hyphomicrobiaceae;g__Rhodoplanes;s__Rhodoplanes serenus
ASV1126	0	0	0	0	0	0	0	0	17	0	0	0	0	0	0	0	0	0	788.1	0	0.001	157.62	17.2661	1.91098e-06	0.000112236	d__Bacteria;p__Proteobacteria;c__Alphaproteobacteria;o__Hyphomicrobiales;f__Hyphomicrobiaceae;g__Rhodoplanes;s__Rhodoplanes serenus
ASV11260	0	0	0	0	0	0	3	0	0	0	0	0	0	0	0	0	126.77	0	0	0	0.001	25.354	14.6299	0.250007	0.441558	d__Bacteria;p__Proteobacteria;c__Alphaproteobacteria;o__Caulobacterales;f__Caulobacteraceae;g__Caulobacter;s__Caulobacter mirabilis
ASV11261	0	0	0	0	0	0	0	0	3	0	0	0	0	0	0	0	0	0	139.08	0	0.001	27.816	14.7636	0.125007	0.349364	d__Bacteria;p__Proteobacteria;c__Gammaproteobacteria;o__Legionellales;f__Coxiellaceae;g__Aquicella;s__uncultured bacterium
ASV11262	0	0	3	0	0	0	0	0	0	0	0	0	126.54	0	0	0	0	0	0	0	25.308	0.001	-14.6273	0.500005	0.551321	d__Bacteria;p__Acidobacteria;c__Acidobacteriia;o__Acidobacteriales;f__Acidobacteriaceae;g__Silvibacterium;s__Silvibacterium dinghuense
ASV11263	0	0	0	0	0	0	3	0	0	0	0	0	0	0	0	0	126.77	0	0	0	0.001	25.354	14.6299	0.250007	0.441558	d__Bacteria;p__Actinobacteria;c__Rubrobacteria;o__Gaiellales;f__Gaiellaceae;g__Gaiella;s__Gaiella occulta
ASV11264	0	0	0	0	0	0	3	0	0	0	0	0	0	0	0	0	126.77	0	0	0	0.001	25.354	14.6299	0.250007	0.441558	d__Bacteria;p__Actinobacteria;c__Thermoleophilia;o__Solirubrobacterales;f__Conexibacteraceae;g__Conexibacter;s__uncultured bacterium
ASV11265	3	0	0	0	0	0	0	0	0	0	132.89	0	0	0	0	0	0	0	0	0	26.578	0.001	-14.6979	0.250007	0.441558	d__Bacteria;p__Armatimonadetes;c__Armatimonadia;o__Capsulimonadales;f__Capsulimonadaceae;g__Capsulimonas;s__Capsulimonas corticalis
ASV11266	0	0	0	3	0	0	0	0	0	0	0	0	0	139.03	0	0	0	0	0	0	27.806	0.001	-14.7631	0.250007	0.441558	d__Bacteria;p__Planctomycetes;c__Planctomycetia;o__Pirellulales;f__Pirellulaceae;g__Rhodopirellula;s__uncultured bacterium
ASV11267	0	0	0	0	3	0	0	0	0	0	0	0	0	0	143.23	0	0	0	0	0	28.646	0.001	-14.806	0.0312547	0.205376	d__Bacteria;p__Proteobacteria;c__Betaproteobacteria;o__Nitrosomonadales;f__Nitrosomonadaceae;g__Nitrosospira
ASV11268	0	0	3	0	0	0	0	0	0	0	0	0	126.54	0	0	0	0	0	0	0	25.308	0.001	-14.6273	0.500005	0.551321	d__Bacteria;p__Proteobacteria;c__Alphaproteobacteria;o__Hyphomicrobiales;f__Hyphomicrobiaceae;g__Rhodoplanes;s__Rhodoplanes serenus
ASV11269	0	0	0	0	0	0	0	0	0	3	0	0	0	0	0	0	0	0	0	134.21	0.001	26.842	14.7122	0.500005	0.551321	d__Bacteria;p__Proteobacteria;c__Alphaproteobacteria;o__Hyphomicrobiales;f__Bradyrhizobiaceae;g__Rhodopseudomonas;s__Rhodopseudomonas palustris
ASV1127	0	0	0	17	0	0	0	0	0	0	0	0	0	787.84	0	0	0	0	0	0	157.568	0.001	-17.2656	7.64107e-06	0.000371087	d__Bacteria;p__Acidobacteria;c__Acidobacteriia;o__Acidobacteriales;f__Acidobacteriaceae;g__Candidatus Koribacter;s__uncultured bacterium
ASV11270	3	0	0	0	0	0	0	0	0	0	132.89	0	0	0	0	0	0	0	0	0	26.578	0.001	-14.6979	0.250007	0.441558	d__Bacteria;p__Proteobacteria;c__Betaproteobacteria;o__norank;f__Casimicrobiaceae;g__Casimicrobium;s__Casimicrobium huifangae
ASV11271	3	0	0	0	0	0	0	0	0	0	132.89	0	0	0	0	0	0	0	0	0	26.578	0.001	-14.6979	0.250007	0.441558	d__Bacteria;p__Acidobacteria;c__Acidobacteriia;o__Acidobacteriales;f__Acidobacteriaceae;g__Candidatus Sulfotelmatobacter;s__Sulfotelmatobacter sp003166855
ASV11272	0	3	0	0	0	0	0	0	0	0	0	135.26	0	0	0	0	0	0	0	0	27.052	0.001	-14.7234	0.250007	0.441558	d__Bacteria;p__Proteobacteria;c__Alphaproteobacteria;o__Rhodospirillales;f__Rhodospirillaceae;g__Hypericibacter;s__Hypericibacter adhaerens
ASV11273	0	0	0	0	3	0	0	0	0	0	0	0	0	0	143.23	0	0	0	0	0	28.646	0.001	-14.806	0.0312547	0.205376	d__Bacteria;p__Proteobacteria;c__Alphaproteobacteria;o__Hyphomicrobiales;f__Roseiarcaceae;g__Roseiarcus;s__uncultured bacterium
ASV11274	0	0	3	0	0	0	0	0	0	0	0	0	126.54	0	0	0	0	0	0	0	25.308	0.001	-14.6273	0.500005	0.551321	d__Bacteria;p__Proteobacteria;c__Alphaproteobacteria;o__Rhodospirillales;f__Stellaceae;g__Stella;s__Stella sp006738865
ASV11275	0	0	0	0	0	3	0	0	0	0	0	0	0	0	0	166.43	0	0	0	0	0.001	33.286	15.0226	0.125007	0.349364	d__Bacteria;p__Actinobacteria;c__Acidimicrobiia;o__Acidimicrobiales;f__Microthrixaceae;g__Candidatus Microthrix;s__Microthrix parvicella
ASV11276	3	0	0	0	0	0	0	0	0	0	132.89	0	0	0	0	0	0	0	0	0	26.578	0.001	-14.6979	0.250007	0.441558	d__Bacteria;p__Proteobacteria;c__Betaproteobacteria;o__Burkholderiales;f__norank;g__Mitsuaria;s__Mitsuaria sp900113225
ASV11277	0	0	3	0	0	0	0	0	0	0	0	0	126.54	0	0	0	0	0	0	0	25.308	0.001	-14.6273	0.500005	0.551321	d__Bacteria;p__Proteobacteria;c__Alphaproteobacteria;o__Hyphomicrobiales;f__Bradyrhizobiaceae;g__Bradyrhizobium;s__Bradyrhizobium elkanii
ASV11278	0	0	0	0	0	0	0	0	3	0	0	0	0	0	0	0	0	0	139.08	0	0.001	27.816	14.7636	0.125007	0.349364	d__Bacteria;p__Proteobacteria;c__Betaproteobacteria;o__Nitrosomonadales;f__Sterolibacteriaceae;g__Denitratisoma;s__Denitratisoma oestradiolicum
ASV11279	0	0	0	0	0	3	0	0	0	0	0	0	0	0	0	166.43	0	0	0	0	0.001	33.286	15.0226	0.125007	0.349364	d__Bacteria;p__Verrucomicrobia;c__Verrucomicrobiae;o__Verrucomicrobiales;f__Verrucomicrobiaceae;g__Luteolibacter;s__uncultured bacterium
ASV1128	0	0	9	8	0	0	0	0	0	0	0	0	379.62	370.75	0	0	0	0	0	0	150.074	0.001	-17.1953	0.000122181	0.00397117	d__Bacteria;p__Proteobacteria;c__Alphaproteobacteria;o__Rhodospirillales;f__Stellaceae;g__Stella;s__Stella humosa
ASV11280	0	0	3	0	0	0	0	0	0	0	0	0	126.54	0	0	0	0	0	0	0	25.308	0.001	-14.6273	0.500005	0.551321	d__Bacteria;p__Bacteroidetes;c__Sphingobacteriia;o__Sphingobacteriales;f__Sphingobacteriaceae;g__Mucilaginibacter;s__Mucilaginibacter ginsenosidivorans
ASV11281	3	0	0	0	0	0	0	0	0	0	132.89	0	0	0	0	0	0	0	0	0	26.578	0.001	-14.6979	0.250007	0.441558	d__Bacteria;p__Nitrospirae;c__Nitrospira;o__norank;f__norank;g__norank;s__uncultured bacterium
ASV11282	0	0	3	0	0	0	0	0	0	0	0	0	126.54	0	0	0	0	0	0	0	25.308	0.001	-14.6273	0.500005	0.551321	d__Bacteria;p__Bacteroidetes;c__Chitinophagia;o__Chitinophagales;f__Chitinophagaceae;g__Edaphobaculum;s__metagenome
ASV11283	0	3	0	0	0	0	0	0	0	0	0	135.26	0	0	0	0	0	0	0	0	27.052	0.001	-14.7234	0.250007	0.441558	d__Bacteria;p__Proteobacteria;c__Gammaproteobacteria;o__Legionellales;f__Legionellaceae;g__Legionella;s__Legionella pneumophila
ASV11284	0	0	0	0	0	0	0	0	3	0	0	0	0	0	0	0	0	0	139.08	0	0.001	27.816	14.7636	0.125007	0.349364	d__Bacteria;p__Proteobacteria;c__Gammaproteobacteria;o__norank;f__norank;g__Acidibacter;s__uncultured gamma proteobacterium
ASV11285	0	0	0	0	0	0	0	0	3	0	0	0	0	0	0	0	0	0	139.08	0	0.001	27.816	14.7636	0.125007	0.349364	d__Bacteria;p__Proteobacteria;c__Alphaproteobacteria;o__Rhodospirillales;f__Rhodospirillaceae;g__Dongia;s__Dongia mobilis
ASV11286	0	0	0	0	0	0	0	0	3	0	0	0	0	0	0	0	0	0	139.08	0	0.001	27.816	14.7636	0.125007	0.349364	d__Bacteria;p__Chloroflexi;c__Ktedonobacteria;o__Ktedonobacterales;f__Dictyobacteraceae;g__Dictyobacter;s__Dictyobacter aurantiacus
ASV11287	0	0	0	0	0	0	3	0	0	0	0	0	0	0	0	0	126.77	0	0	0	0.001	25.354	14.6299	0.250007	0.441558	d__Bacteria;p__Planctomycetes;c__Planctomycetia;o__Pirellulales;f__Pirellulaceae;g__Pirellula;s__uncultured bacterium
ASV11288	3	0	0	0	0	0	0	0	0	0	132.89	0	0	0	0	0	0	0	0	0	26.578	0.001	-14.6979	0.250007	0.441558	d__Bacteria;p__Verrucomicrobia;c__Verrucomicrobiae;o__Verrucomicrobiales;f__Verrucomicrobia subdivision 3;g__Pedosphaera;s__metagenome
ASV11289	0	0	0	0	0	0	0	0	3	0	0	0	0	0	0	0	0	0	139.08	0	0.001	27.816	14.7636	0.125007	0.349364	d__Bacteria;p__Proteobacteria;c__Deltaproteobacteria;o__Desulfuromonadales;f__Geobacteraceae;g__Geobacter;s__Trichlorobacter thiogenes
ASV1129	0	0	0	0	0	17	0	0	0	0	0	0	0	0	0	943.08	0	0	0	0	0.001	188.616	17.5251	1.91098e-06	0.000112236	d__Bacteria;p__Planctomycetes;c__Planctomycetia;o__Pirellulales;f__Pirellulaceae;g__Blastopirellula;s__Blastopirellula retiformator
ASV11290	3	0	0	0	0	0	0	0	0	0	132.89	0	0	0	0	0	0	0	0	0	26.578	0.001	-14.6979	0.250007	0.441558	d__Bacteria;p__Proteobacteria;c__Alphaproteobacteria;o__Hyphomicrobiales;f__Bradyrhizobiaceae;g__Afipia;s__Afipia broomeae
ASV11291	0	0	0	0	0	0	3	0	0	0	0	0	0	0	0	0	126.77	0	0	0	0.001	25.354	14.6299	0.250007	0.441558	d__Bacteria;p__Proteobacteria;c__Alphaproteobacteria;o__Hyphomicrobiales;f__Xanthobacteraceae;g__Pseudolabrys;s__uncultured bacterium
ASV11292	0	3	0	0	0	0	0	0	0	0	0	135.26	0	0	0	0	0	0	0	0	27.052	0.001	-14.7234	0.250007	0.441558	d__Bacteria;p__Proteobacteria;c__Alphaproteobacteria;o__Hyphomicrobiales;f__Reyranellaceae;g__Reyranella
ASV11293	0	0	0	0	0	0	0	0	3	0	0	0	0	0	0	0	0	0	139.08	0	0.001	27.816	14.7636	0.125007	0.349364	d__Bacteria;p__Proteobacteria;c__Alphaproteobacteria;o__Hyphomicrobiales;f__Bradyrhizobiaceae;g__Afipia;s__Afipia broomeae
ASV11294	0	0	0	0	0	0	0	0	3	0	0	0	0	0	0	0	0	0	139.08	0	0.001	27.816	14.7636	0.125007	0.349364	d__Bacteria;p__Proteobacteria;c__Betaproteobacteria;o__Burkholderiales;f__Burkholderiaceae;g__Caballeronia;s__Caballeronia concitans
ASV11295	3	0	0	0	0	0	0	0	0	0	132.89	0	0	0	0	0	0	0	0	0	26.578	0.001	-14.6979	0.250007	0.441558	d__Bacteria;p__Actinobacteria;c__Rubrobacteria;o__Gaiellales;f__Gaiellaceae;g__Gaiella;s__uncultured soil bacterium
ASV11296	0	0	0	0	3	0	0	0	0	0	0	0	0	0	143.23	0	0	0	0	0	28.646	0.001	-14.806	0.0312547	0.205376	d__Bacteria;p__Cyanobacteria;c__norank;o__Nostocales;f__Aphanizomenonaceae;g__Dolichospermum;s__Dolichospermum flosaquae
ASV11297	0	0	0	0	3	0	0	0	0	0	0	0	0	0	143.23	0	0	0	0	0	28.646	0.001	-14.806	0.0312547	0.205376	d__Bacteria;p__Actinobacteria;c__Actinomycetia;o__Streptosporangiales;f__Thermomonosporaceae;g__Thermomonospora;s__Thermomonospora amylolytica
ASV11298	0	0	0	0	3	0	0	0	0	0	0	0	0	0	143.23	0	0	0	0	0	28.646	0.001	-14.806	0.0312547	0.205376	d__Bacteria;p__Proteobacteria;c__Betaproteobacteria;o__Burkholderiales;f__Comamonadaceae;g__Rhodoferax;s__Rhodoferax sp006974105
ASV11299	0	0	3	0	0	0	0	0	0	0	0	0	126.54	0	0	0	0	0	0	0	25.308	0.001	-14.6273	0.500005	0.551321	d__Bacteria;p__Actinobacteria;c__Rubrobacteria;o__Gaiellales;f__Gaiellaceae;g__Gaiella;s__Gaiella occulta
ASV113	0	18	53	0	0	0	0	0	0	0	0	811.58	2235.53	0	0	0	0	0	0	0	609.422	0.001	-19.2171	1.12622e-16	3.72066e-14	d__Bacteria;p__Bacteroidetes;c__Chitinophagia;o__Chitinophagales;f__Chitinophagaceae;g__Sediminibacterium;s__Sediminibacterium magnilacihabitans
ASV1130	0	17	0	0	0	0	0	0	0	0	0	766.49	0	0	0	0	0	0	0	0	153.298	0.001	-17.226	7.64107e-06	0.000371087	d__Bacteria;p__Actinobacteria;c__Actinomycetia;o__Frankiales;f__Frankiaceae;g__Frankia;s__Frankia californiensis
ASV11300	0	3	0	0	0	0	0	0	0	0	0	135.26	0	0	0	0	0	0	0	0	27.052	0.001	-14.7234	0.250007	0.441558	d__Bacteria;p__Proteobacteria;c__Deltaproteobacteria;o__Myxococcales;f__norank;g__Minicystis;s__Minicystis rosea
ASV11301	0	0	0	0	3	0	0	0	0	0	0	0	0	0	143.23	0	0	0	0	0	28.646	0.001	-14.806	0.0312547	0.205376	d__Bacteria;p__Proteobacteria;c__Alphaproteobacteria;o__Rhodospirillales;f__Acetobacteraceae;g__Granulibacter;s__Granulibacter bethesdensis_B
ASV11302	0	0	0	0	0	0	0	0	3	0	0	0	0	0	0	0	0	0	139.08	0	0.001	27.816	14.7636	0.125007	0.349364	d__Bacteria;p__Proteobacteria;c__Deltaproteobacteria;o__Myxococcales;f__Anaeromyxobacteraceae;g__Anaeromyxobacter;s__Anaeromyxobacter dehalogenans
ASV11303	0	0	0	0	0	0	0	0	0	3	0	0	0	0	0	0	0	0	0	134.21	0.001	26.842	14.7122	0.500005	0.551321	d__Bacteria;p__Acidobacteria;c__Blastocatellia;o__Blastocatellales;f__Blastocatellaceae;g__Stenotrophobacter;s__uncultured Acidobacteria bacterium
ASV11304	0	0	0	0	3	0	0	0	0	0	0	0	0	0	143.23	0	0	0	0	0	28.646	0.001	-14.806	0.0312547	0.205376	d__Bacteria;p__Firmicutes;c__Bacilli;o__Bacillales;f__Staphylococcaceae;g__Staphylococcus;s__Staphylococcus aureus
ASV11305	0	3	0	0	0	0	0	0	0	0	0	135.26	0	0	0	0	0	0	0	0	27.052	0.001	-14.7234	0.250007	0.441558	d__Bacteria;p__Proteobacteria;c__Deltaproteobacteria;o__Myxococcales;f__Kofleriaceae;g__Haliangium;s__Haliangium ochraceum
ASV11306	0	0	0	0	0	0	3	0	0	0	0	0	0	0	0	0	126.77	0	0	0	0.001	25.354	14.6299	0.250007	0.441558	d__Bacteria;p__Proteobacteria;c__Deltaproteobacteria;o__Desulfuromonadales;f__Geobacteraceae;g__Geobacter;s__Geobacter pickeringii
ASV11307	0	3	0	0	0	0	0	0	0	0	0	135.26	0	0	0	0	0	0	0	0	27.052	0.001	-14.7234	0.250007	0.441558	d__Bacteria;p__Bacteroidetes;c__Chitinophagia;o__Chitinophagales;f__Chitinophagaceae;g__Ferruginibacter;s__Ferruginibacter sp001898465
ASV11308	0	0	0	0	0	3	0	0	0	0	0	0	0	0	0	166.43	0	0	0	0	0.001	33.286	15.0226	0.125007	0.349364	d__Bacteria;p__Proteobacteria;c__Deltaproteobacteria;o__Desulfuromonadales;f__Geobacteraceae;g__Geobacter;s__Geobacter sulfurreducens
ASV11309	0	3	0	0	0	0	0	0	0	0	0	135.26	0	0	0	0	0	0	0	0	27.052	0.001	-14.7234	0.250007	0.441558	d__Bacteria;p__Proteobacteria;c__Alphaproteobacteria;o__Rhodospirillales;f__Rhodospirillaceae;g__Dongia;s__Dongia mobilis
ASV1131	0	0	0	0	0	0	0	0	0	17	0	0	0	0	0	0	0	0	0	760.52	0.001	152.104	17.2147	0.000244331	0.00670089	d__Bacteria;p__Firmicutes;c__Clostridia;o__Eubacteriales;f__Clostridiaceae;g__Clostridium;s__Clostridium beijerinckii
ASV11310	0	3	0	0	0	0	0	0	0	0	0	135.26	0	0	0	0	0	0	0	0	27.052	0.001	-14.7234	0.250007	0.441558	d__Bacteria;p__Gemmatimonadetes;c__Gemmatimonadetes;o__Gemmatimonadales;f__Gemmatimonadaceae;g__Gemmatirosa;s__Gemmatirosa kalamazoonesis
ASV11311	3	0	0	0	0	0	0	0	0	0	132.89	0	0	0	0	0	0	0	0	0	26.578	0.001	-14.6979	0.250007	0.441558	d__Bacteria;p__Planctomycetes;c__Phycisphaerae;o__Sedimentisphaerales;f__Sedimentisphaeraceae;g__Limihaloglobus;s__Limihaloglobus sulfuriphilus
ASV11312	0	0	0	0	0	0	0	0	3	0	0	0	0	0	0	0	0	0	139.08	0	0.001	27.816	14.7636	0.125007	0.349364	d__Bacteria;p__Proteobacteria;c__Deltaproteobacteria;o__Myxococcales;f__Labilitrichaceae;g__Labilithrix;s__Labilithrix luteola
ASV11313	0	0	0	0	0	0	3	0	0	0	0	0	0	0	0	0	126.77	0	0	0	0.001	25.354	14.6299	0.250007	0.441558	d__Bacteria;p__Planctomycetes;c__Phycisphaerae;o__Tepidisphaerales;f__Tepidisphaeraceae;g__Tepidisphaera;s__uncultured bacterium
ASV11314	0	3	0	0	0	0	0	0	0	0	0	135.26	0	0	0	0	0	0	0	0	27.052	0.001	-14.7234	0.250007	0.441558	d__Bacteria;p__Proteobacteria;c__Alphaproteobacteria;o__Sphingomonadales;f__Sphingomonadaceae;g__Sphingomonas;s__Sphingomonas sp000797515
ASV11315	0	0	0	0	0	0	3	0	0	0	0	0	0	0	0	0	126.77	0	0	0	0.001	25.354	14.6299	0.250007	0.441558	d__Bacteria;p__Planctomycetes;c__Planctomycetia;o__Planctomycetales;f__Planctomycetaceae;g__Gimesia;s__Gimesia sp007748135
ASV11316	0	0	0	0	0	0	0	0	3	0	0	0	0	0	0	0	0	0	139.08	0	0.001	27.816	14.7636	0.125007	0.349364	Unclassified
ASV11317	0	0	0	0	0	0	0	0	0	3	0	0	0	0	0	0	0	0	0	134.21	0.001	26.842	14.7122	0.500005	0.551321	d__Bacteria;p__Acidobacteria;c__Vicinamibacteria;o__norank;f__Vicinamibacteraceae;g__Luteitalea;s__Luteitalea pratensis
ASV11318	3	0	0	0	0	0	0	0	0	0	132.89	0	0	0	0	0	0	0	0	0	26.578	0.001	-14.6979	0.250007	0.441558	d__Bacteria;p__Proteobacteria;c__Alphaproteobacteria;o__Rhodospirillales;f__Rhodospirillaceae
ASV11319	3	0	0	0	0	0	0	0	0	0	132.89	0	0	0	0	0	0	0	0	0	26.578	0.001	-14.6979	0.250007	0.441558	d__Bacteria;p__Proteobacteria;c__Gammaproteobacteria;o__Xanthomonadales;f__Xanthomonadaceae;g__Arenimonas;s__Arenimonas composti
ASV1132	0	0	0	17	0	0	0	0	0	0	0	0	0	787.84	0	0	0	0	0	0	157.568	0.001	-17.2656	7.64107e-06	0.000371087	d__Bacteria;p__Acidobacteria;c__Acidobacteriia;o__Acidobacteriales;f__Acidobacteriaceae;g__Occallatibacter;s__uncultured bacterium
ASV11320	0	0	3	0	0	0	0	0	0	0	0	0	126.54	0	0	0	0	0	0	0	25.308	0.001	-14.6273	0.500005	0.551321	d__Bacteria;p__Acidobacteria;c__Acidobacteriia;o__Acidobacteriales;f__Acidobacteriaceae;g__Edaphobacter
ASV11321	0	0	0	0	3	0	0	0	0	0	0	0	0	0	143.23	0	0	0	0	0	28.646	0.001	-14.806	0.0312547	0.205376	d__Bacteria;p__Proteobacteria;c__Betaproteobacteria;o__Burkholderiales;f__Oxalobacteraceae;g__Collimonas;s__Collimonas arenae
ASV11322	0	0	0	0	0	0	0	0	3	0	0	0	0	0	0	0	0	0	139.08	0	0.001	27.816	14.7636	0.125007	0.349364	d__Bacteria;p__Verrucomicrobia;c__Spartobacteria;o__Chthoniobacterales;f__Chthoniobacteraceae;g__Chthoniobacter;s__Chthoniobacter flavus
ASV11323	3	0	0	0	0	0	0	0	0	0	132.89	0	0	0	0	0	0	0	0	0	26.578	0.001	-14.6979	0.250007	0.441558	d__Bacteria;p__Acidobacteria;c__Vicinamibacteria;o__norank;f__Vicinamibacteraceae;g__Luteitalea;s__Luteitalea pratensis
ASV11324	0	0	0	0	0	3	0	0	0	0	0	0	0	0	0	166.43	0	0	0	0	0.001	33.286	15.0226	0.125007	0.349364	d__Bacteria;p__Proteobacteria;c__Betaproteobacteria;o__Burkholderiales;f__norank;g__Roseateles;s__Roseateles depolymerans
ASV11325	0	0	0	0	0	0	0	0	3	0	0	0	0	0	0	0	0	0	139.08	0	0.001	27.816	14.7636	0.125007	0.349364	d__Bacteria;p__Proteobacteria;c__Alphaproteobacteria;o__Rhodospirillales;f__Acetobacteraceae;g__Acidicaldus;s__uncultured bacterium
ASV11326	0	0	0	0	0	0	0	0	0	3	0	0	0	0	0	0	0	0	0	134.21	0.001	26.842	14.7122	0.500005	0.551321	Unclassified
ASV11327	0	0	3	0	0	0	0	0	0	0	0	0	126.54	0	0	0	0	0	0	0	25.308	0.001	-14.6273	0.500005	0.551321	d__Bacteria;p__Proteobacteria;c__Alphaproteobacteria;o__Hyphomicrobiales;f__Bradyrhizobiaceae;g__Bradyrhizobium;s__Bradyrhizobium sp011516635
ASV11328	3	0	0	0	0	0	0	0	0	0	132.89	0	0	0	0	0	0	0	0	0	26.578	0.001	-14.6979	0.250007	0.441558	d__Bacteria;p__Proteobacteria;c__Betaproteobacteria;o__Burkholderiales;f__Comamonadaceae;g__Variovorax;s__Variovorax sp003019815
ASV11329	0	0	3	0	0	0	0	0	0	0	0	0	126.54	0	0	0	0	0	0	0	25.308	0.001	-14.6273	0.500005	0.551321	d__Bacteria;p__Acidobacteria;c__Acidobacteriia;o__Acidobacteriales;f__Acidobacteriaceae;g__Candidatus Koribacter;s__uncultured bacterium
ASV1133	0	0	0	0	0	0	0	17	0	0	0	0	0	0	0	0	0	3927	0	0	0.001	785.4	19.5831	0.0312547	0.205376	d__Bacteria;p__Acidobacteria;c__Acidobacteriia;o__Acidobacteriales;f__Acidobacteriaceae;g__Terracidiphilus;s__Terracidiphilus sp903849645
ASV11330	0	0	0	0	0	0	0	0	3	0	0	0	0	0	0	0	0	0	139.08	0	0.001	27.816	14.7636	0.125007	0.349364	d__Bacteria;p__Proteobacteria;c__Deltaproteobacteria;o__Desulfuromonadales;f__Geobacteraceae;g__Geobacter;s__Geobacter sulfurreducens
ASV11331	0	0	0	0	0	0	3	0	0	0	0	0	0	0	0	0	126.77	0	0	0	0.001	25.354	14.6299	0.250007	0.441558	d__Bacteria;p__Proteobacteria;c__Betaproteobacteria;o__Burkholderiales;f__Burkholderiaceae;g__Cupriavidus;s__Cupriavidus taiwanensis
ASV11332	0	0	0	0	3	0	0	0	0	0	0	0	0	0	143.23	0	0	0	0	0	28.646	0.001	-14.806	0.0312547	0.205376	d__Bacteria;p__Proteobacteria;c__Betaproteobacteria;o__Burkholderiales;f__Oxalobacteraceae;g__Undibacterium
ASV11333	0	0	0	0	0	0	3	0	0	0	0	0	0	0	0	0	126.77	0	0	0	0.001	25.354	14.6299	0.250007	0.441558	d__Bacteria;p__Firmicutes;c__Clostridia;o__Eubacteriales;f__Peptococcaceae;g__Desulfofundulus;s__Desulfofundulus kuznetsovii
ASV11334	0	0	0	0	0	0	0	0	0	3	0	0	0	0	0	0	0	0	0	134.21	0.001	26.842	14.7122	0.500005	0.551321	d__Bacteria;p__Proteobacteria;c__Alphaproteobacteria;o__Hyphomicrobiales;f__Bradyrhizobiaceae;g__Bradyrhizobium;s__Bradyrhizobium sp000426785
ASV11335	0	0	0	0	0	0	0	0	3	0	0	0	0	0	0	0	0	0	139.08	0	0.001	27.816	14.7636	0.125007	0.349364	d__Bacteria;p__Proteobacteria;c__Alphaproteobacteria;o__Caulobacterales;f__Caulobacteraceae;g__Phenylobacterium;s__Phenylobacterium sp001557235
ASV11336	3	0	0	0	0	0	0	0	0	0	132.89	0	0	0	0	0	0	0	0	0	26.578	0.001	-14.6979	0.250007	0.441558	d__Bacteria;p__Acidobacteria;c__Acidobacteriia;o__Acidobacteriales;f__Acidobacteriaceae;g__Edaphobacter
ASV11337	0	0	0	0	0	0	3	0	0	0	0	0	0	0	0	0	126.77	0	0	0	0.001	25.354	14.6299	0.250007	0.441558	d__Bacteria;p__Proteobacteria;c__Alphaproteobacteria;o__Rhodospirillales;f__Rhodospirillaceae;g__Dongia;s__Dongia sp000620685
ASV11338	0	0	0	0	0	3	0	0	0	0	0	0	0	0	0	166.43	0	0	0	0	0.001	33.286	15.0226	0.125007	0.349364	d__Bacteria;p__Planctomycetes;c__Planctomycetia;o__Pirellulales;f__Pirellulaceae;g__Pirellula;s__uncultured bacterium
ASV11339	0	0	0	0	0	0	0	0	3	0	0	0	0	0	0	0	0	0	139.08	0	0.001	27.816	14.7636	0.125007	0.349364	d__Bacteria;p__Acidobacteria;c__Blastocatellia;o__Blastocatellales;f__Pyrinomonadaceae;g__Pyrinomonas;s__Pyrinomonas methylaliphatogenes
ASV1134	0	0	0	0	0	17	0	0	0	0	0	0	0	0	0	943.08	0	0	0	0	0.001	188.616	17.5251	1.91098e-06	0.000112236	d__Bacteria;p__Bacteroidetes;c__Chitinophagia;o__Chitinophagales;f__Chitinophagaceae;g__Aurantisolimonas;s__metagenome
ASV11340	0	0	0	0	0	0	3	0	0	0	0	0	0	0	0	0	126.77	0	0	0	0.001	25.354	14.6299	0.250007	0.441558	d__Bacteria;p__Actinobacteria;c__Acidimicrobiia;o__Acidimicrobiales;f__Acidimicrobiaceae;g__Ferrimicrobium;s__Ferrimicrobium acidiphilum
ASV11341	0	0	0	0	3	0	0	0	0	0	0	0	0	0	143.23	0	0	0	0	0	28.646	0.001	-14.806	0.0312547	0.205376	d__Bacteria;p__Proteobacteria;c__Gammaproteobacteria;o__Pseudomonadales;f__Moraxellaceae;g__Cavicella;s__uncultured bacterium
ASV11342	0	0	0	0	0	0	3	0	0	0	0	0	0	0	0	0	126.77	0	0	0	0.001	25.354	14.6299	0.250007	0.441558	d__Bacteria;p__Verrucomicrobia;c__Verrucomicrobiae;o__Verrucomicrobiales;f__Verrucomicrobia subdivision 3;g__Pedosphaera;s__uncultured bacterium
ASV11343	3	0	0	0	0	0	0	0	0	0	132.89	0	0	0	0	0	0	0	0	0	26.578	0.001	-14.6979	0.250007	0.441558	d__Bacteria;p__Acidobacteria;c__Acidobacteriia;o__Acidobacteriales;f__Acidobacteriaceae;g__Occallatibacter;s__uncultured Acidobacteria bacterium
ASV11344	0	3	0	0	0	0	0	0	0	0	0	135.26	0	0	0	0	0	0	0	0	27.052	0.001	-14.7234	0.250007	0.441558	d__Bacteria;p__Acidobacteria;c__Acidobacteriia;o__Acidobacteriales;f__Acidobacteriaceae;g__Edaphobacter;s__uncultured Acidobacteria bacterium
ASV11345	3	0	0	0	0	0	0	0	0	0	132.89	0	0	0	0	0	0	0	0	0	26.578	0.001	-14.6979	0.250007	0.441558	d__Bacteria;p__Proteobacteria;c__Betaproteobacteria;o__Burkholderiales;f__Burkholderiaceae;g__Caballeronia;s__Caballeronia insecticola
ASV11346	0	3	0	0	0	0	0	0	0	0	0	135.26	0	0	0	0	0	0	0	0	27.052	0.001	-14.7234	0.250007	0.441558	d__Bacteria;p__Verrucomicrobia;c__Verrucomicrobiae;o__Verrucomicrobiales;f__Verrucomicrobia subdivision 3;g__Pedosphaera;s__uncultured bacterium
ASV11347	0	0	0	0	0	0	0	0	3	0	0	0	0	0	0	0	0	0	139.08	0	0.001	27.816	14.7636	0.125007	0.349364	d__Bacteria;p__Proteobacteria;c__Alphaproteobacteria;o__Hyphomicrobiales;f__Bradyrhizobiaceae;g__Bradyrhizobium
ASV11348	0	0	3	0	0	0	0	0	0	0	0	0	126.54	0	0	0	0	0	0	0	25.308	0.001	-14.6273	0.500005	0.551321	d__Bacteria;p__Proteobacteria;c__Alphaproteobacteria;o__Hyphomicrobiales;f__Bradyrhizobiaceae;g__Bradyrhizobium
ASV11349	3	0	0	0	0	0	0	0	0	0	132.89	0	0	0	0	0	0	0	0	0	26.578	0.001	-14.6979	0.250007	0.441558	d__Bacteria;p__Planctomycetes;c__Phycisphaerae;o__Tepidisphaerales;f__Tepidisphaeraceae;g__Tepidisphaera;s__uncultured bacterium
ASV1135	0	0	0	0	17	0	0	0	0	0	0	0	0	0	811.61	0	0	0	0	0	162.322	0.001	-17.3085	1.87076e-09	2.33687e-07	d__Bacteria;p__Proteobacteria;c__Betaproteobacteria;o__Burkholderiales;f__norank;g__Ideonella
ASV11350	0	0	3	0	0	0	0	0	0	0	0	0	126.54	0	0	0	0	0	0	0	25.308	0.001	-14.6273	0.500005	0.551321	d__Bacteria;p__Proteobacteria;c__Gammaproteobacteria;o__Legionellales;f__Legionellaceae;g__Tatlockia;s__Tatlockia feeleii
ASV11351	0	0	0	3	0	0	0	0	0	0	0	0	0	139.03	0	0	0	0	0	0	27.806	0.001	-14.7631	0.250007	0.441558	d__Bacteria;p__Planctomycetes;c__Planctomycetia;o__Gemmatales;f__Gemmataceae;g__Fimbriiglobus;s__Fimbriiglobus ruber
ASV11352	3	0	0	0	0	0	0	0	0	0	132.89	0	0	0	0	0	0	0	0	0	26.578	0.001	-14.6979	0.250007	0.441558	d__Bacteria;p__Proteobacteria;c__Betaproteobacteria;o__Burkholderiales;f__Oxalobacteraceae;g__Duganella;s__Duganella sp003217375
ASV11353	0	0	0	0	0	3	0	0	0	0	0	0	0	0	0	166.43	0	0	0	0	0.001	33.286	15.0226	0.125007	0.349364	d__Bacteria;p__Bacteroidetes;c__Flavobacteriia;o__Flavobacteriales;f__Flavobacteriaceae;g__Flavobacterium;s__Flavobacterium glycines
ASV11354	0	0	0	0	0	0	0	0	3	0	0	0	0	0	0	0	0	0	139.08	0	0.001	27.816	14.7636	0.125007	0.349364	d__Bacteria;p__Proteobacteria;c__Alphaproteobacteria;o__Hyphomicrobiales;f__Hyphomicrobiaceae;g__Rhodoplanes;s__Rhodoplanes serenus
ASV11355	0	0	0	0	0	0	3	0	0	0	0	0	0	0	0	0	126.77	0	0	0	0.001	25.354	14.6299	0.250007	0.441558	d__Bacteria;p__Acidobacteria;c__Acidobacteriia;o__Acidobacteriales;f__Acidobacteriaceae;g__Edaphobacter;s__Edaphobacter aggregans
ASV11356	0	3	0	0	0	0	0	0	0	0	0	135.26	0	0	0	0	0	0	0	0	27.052	0.001	-14.7234	0.250007	0.441558	d__Bacteria;p__Planctomycetes;c__Planctomycetia;o__Gemmatales;f__Gemmataceae;g__Fimbriiglobus;s__Fimbriiglobus ruber
ASV11357	3	0	0	0	0	0	0	0	0	0	132.89	0	0	0	0	0	0	0	0	0	26.578	0.001	-14.6979	0.250007	0.441558	d__Bacteria;p__Planctomycetes;c__Planctomycetia;o__Gemmatales;f__Gemmataceae;g__Fimbriiglobus;s__Fimbriiglobus ruber
ASV11358	0	0	0	0	3	0	0	0	0	0	0	0	0	0	143.23	0	0	0	0	0	28.646	0.001	-14.806	0.0312547	0.205376	d__Bacteria;p__Acidobacteria;c__Acidobacteriia;o__Acidobacteriales;f__Acidobacteriaceae;g__Candidatus Koribacter;s__uncultured bacterium
ASV11359	0	3	0	0	0	0	0	0	0	0	0	135.26	0	0	0	0	0	0	0	0	27.052	0.001	-14.7234	0.250007	0.441558	d__Bacteria;p__Acidobacteria;c__Acidobacteriia;o__Bryobacterales;f__Bryobacteraceae;g__Bryobacter;s__uncultured Acidobacteria bacterium
ASV1136	0	0	0	17	0	0	0	0	0	0	0	0	0	787.84	0	0	0	0	0	0	157.568	0.001	-17.2656	7.64107e-06	0.000371087	d__Bacteria;p__Firmicutes;c__Clostridia;o__Eubacteriales;f__Peptococcaceae;g__Desulfofundulus;s__Desulfofundulus kuznetsovii
ASV11360	3	0	0	0	0	0	0	0	0	0	132.89	0	0	0	0	0	0	0	0	0	26.578	0.001	-14.6979	0.250007	0.441558	d__Bacteria;p__Proteobacteria;c__Alphaproteobacteria;o__Hyphomicrobiales;f__Xanthobacteraceae;g__Pseudolabrys;s__uncultured bacterium
ASV11361	0	0	3	0	0	0	0	0	0	0	0	0	126.54	0	0	0	0	0	0	0	25.308	0.001	-14.6273	0.500005	0.551321	d__Bacteria;p__Acidobacteria;c__Holophagae;o__Holophagales;f__Holophagaceae
ASV11362	0	0	0	0	0	0	0	0	3	0	0	0	0	0	0	0	0	0	139.08	0	0.001	27.816	14.7636	0.125007	0.349364	d__Bacteria;p__Planctomycetes;c__Planctomycetia;o__Isosphaerales;f__Isosphaeraceae;g__Singulisphaera;s__Singulisphaera acidiphila
ASV11363	0	0	0	0	0	0	0	0	3	0	0	0	0	0	0	0	0	0	139.08	0	0.001	27.816	14.7636	0.125007	0.349364	d__Bacteria;p__Firmicutes;c__Bacilli;o__Bacillales;f__Planococcaceae;g__Rummeliibacillus;s__Rummeliibacillus pycnus
ASV11364	0	0	0	0	0	0	0	0	0	3	0	0	0	0	0	0	0	0	0	134.21	0.001	26.842	14.7122	0.500005	0.551321	d__Bacteria;p__Acidobacteria;c__Vicinamibacteria;o__norank;f__Vicinamibacteraceae;g__Luteitalea;s__Luteitalea pratensis
ASV11365	0	0	0	3	0	0	0	0	0	0	0	0	0	139.03	0	0	0	0	0	0	27.806	0.001	-14.7631	0.250007	0.441558	d__Bacteria;p__Proteobacteria;c__Betaproteobacteria;o__Burkholderiales;f__Burkholderiaceae;g__Paraburkholderia;s__Paraburkholderia sp003002025
ASV11366	3	0	0	0	0	0	0	0	0	0	132.89	0	0	0	0	0	0	0	0	0	26.578	0.001	-14.6979	0.250007	0.441558	d__Bacteria;p__Gemmatimonadetes;c__Gemmatimonadetes;o__Gemmatimonadales;f__Gemmatimonadaceae;g__Gemmatimonas
ASV11367	0	0	0	0	3	0	0	0	0	0	0	0	0	0	143.23	0	0	0	0	0	28.646	0.001	-14.806	0.0312547	0.205376	d__Bacteria;p__Proteobacteria;c__Deltaproteobacteria;o__Myxococcales;f__Polyangiaceae;g__Aetherobacter;s__metagenome
ASV11368	0	0	0	3	0	0	0	0	0	0	0	0	0	139.03	0	0	0	0	0	0	27.806	0.001	-14.7631	0.250007	0.441558	d__Bacteria;p__Actinobacteria;c__Thermoleophilia;o__Solirubrobacterales;f__Solirubrobacteraceae;g__Solirubrobacter;s__uncultured bacterium
ASV11369	0	3	0	0	0	0	0	0	0	0	0	135.26	0	0	0	0	0	0	0	0	27.052	0.001	-14.7234	0.250007	0.441558	d__Bacteria;p__Proteobacteria;c__Betaproteobacteria;o__Burkholderiales;f__Comamonadaceae;g__Variovorax;s__Variovorax sp003952185
ASV1137	0	0	0	0	0	0	0	0	0	17	0	0	0	0	0	0	0	0	0	760.52	0.001	152.104	17.2147	0.000244331	0.00670089	d__Bacteria;p__Acidobacteria;c__Acidobacteriia;o__Acidobacteriales;f__Acidobacteriaceae;g__Candidatus Koribacter;s__uncultured bacterium
ASV11370	0	0	0	3	0	0	0	0	0	0	0	0	0	139.03	0	0	0	0	0	0	27.806	0.001	-14.7631	0.250007	0.441558	d__Bacteria;p__Proteobacteria;c__Betaproteobacteria;o__Nitrosomonadales;f__Nitrosomonadaceae;g__Nitrosospira;s__Nitrosospira sp003053905
ASV11371	0	3	0	0	0	0	0	0	0	0	0	135.26	0	0	0	0	0	0	0	0	27.052	0.001	-14.7234	0.250007	0.441558	d__Bacteria;p__Elusimicrobia
ASV11372	0	0	0	0	3	0	0	0	0	0	0	0	0	0	143.23	0	0	0	0	0	28.646	0.001	-14.806	0.0312547	0.205376	d__Bacteria;p__Proteobacteria;c__Oligoflexia;o__Bdellovibrionales;f__Bdellovibrionaceae;g__Bdellovibrio;s__uncultured bacterium
ASV11373	0	0	0	0	0	0	0	0	3	0	0	0	0	0	0	0	0	0	139.08	0	0.001	27.816	14.7636	0.125007	0.349364	d__Bacteria;p__Bacteroidetes;c__Chitinophagia;o__Chitinophagales;f__Chitinophagaceae;g__Flavihumibacter;s__Flavihumibacter stibioxidans
ASV11374	0	0	0	0	0	0	3	0	0	0	0	0	0	0	0	0	126.77	0	0	0	0.001	25.354	14.6299	0.250007	0.441558	d__Bacteria;p__Proteobacteria;c__Betaproteobacteria;o__Nitrosomonadales;f__Sulfuricellaceae;g__Sulfuriferula;s__Sulfuriferula plumbiphila
ASV11375	0	3	0	0	0	0	0	0	0	0	0	135.26	0	0	0	0	0	0	0	0	27.052	0.001	-14.7234	0.250007	0.441558	d__Bacteria;p__Proteobacteria;c__Betaproteobacteria;o__Burkholderiales;f__Oxalobacteraceae;g__Pseudoduganella;s__Pseudoduganella umbonata
ASV11376	0	0	0	0	0	3	0	0	0	0	0	0	0	0	0	166.43	0	0	0	0	0.001	33.286	15.0226	0.125007	0.349364	d__Bacteria;p__Acidobacteria;c__Acidobacteriia;o__Acidobacteriales;f__Acidobacteriaceae;g__Candidatus Koribacter;s__uncultured bacterium
ASV11377	0	0	0	0	0	0	3	0	0	0	0	0	0	0	0	0	126.77	0	0	0	0.001	25.354	14.6299	0.250007	0.441558	d__Bacteria;p__Acidobacteria;c__Acidobacteriia;o__Acidobacteriales;f__Acidobacteriaceae;g__Terriglobus;s__Terriglobus roseus_B
ASV11378	0	0	0	0	0	0	0	0	3	0	0	0	0	0	0	0	0	0	139.08	0	0.001	27.816	14.7636	0.125007	0.349364	d__Bacteria;p__Firmicutes;c__Negativicutes;o__Selenomonadales;f__Sporomusaceae;g__Methylomusa;s__Methylomusa anaerophila
ASV11379	0	0	0	3	0	0	0	0	0	0	0	0	0	139.03	0	0	0	0	0	0	27.806	0.001	-14.7631	0.250007	0.441558	d__Bacteria;p__Acidobacteria;c__Acidobacteriia;o__Acidobacteriales;f__Acidobacteriaceae;g__Candidatus Koribacter;s__uncultured bacterium
ASV1138	0	0	0	0	0	16	0	0	0	0	0	0	0	0	0	887.61	0	0	0	0	0.001	177.522	17.4376	3.82122e-06	0.000205887	d__Bacteria;p__Bacteroidetes;c__Flavobacteriia;o__Flavobacteriales;f__Flavobacteriaceae;g__Flavobacterium;s__Flavobacterium psychrophilum
ASV11380	0	0	0	3	0	0	0	0	0	0	0	0	0	139.03	0	0	0	0	0	0	27.806	0.001	-14.7631	0.250007	0.441558	d__Bacteria;p__Verrucomicrobia;c__Verrucomicrobiae;o__Verrucomicrobiales;f__Verrucomicrobia subdivision 3;g__Pedosphaera;s__Pedosphaera parvula
ASV11381	0	0	0	0	0	0	0	0	3	0	0	0	0	0	0	0	0	0	139.08	0	0.001	27.816	14.7636	0.125007	0.349364	d__Bacteria;p__Proteobacteria;c__Betaproteobacteria;o__Rhodocyclales;f__Azonexaceae;g__Azonexus;s__Azonexus sp013693915
ASV11382	0	3	0	0	0	0	0	0	0	0	0	135.26	0	0	0	0	0	0	0	0	27.052	0.001	-14.7234	0.250007	0.441558	d__Bacteria;p__Proteobacteria;c__Alphaproteobacteria;o__Hyphomicrobiales;f__Bradyrhizobiaceae;g__Bradyrhizobium;s__Bradyrhizobium sp000938305
ASV11383	0	0	0	0	0	0	0	0	3	0	0	0	0	0	0	0	0	0	139.08	0	0.001	27.816	14.7636	0.125007	0.349364	d__Bacteria;p__Acidobacteria;c__Vicinamibacteria;o__norank;f__Vicinamibacteraceae;g__Luteitalea;s__Luteitalea pratensis
ASV11384	0	0	0	0	0	0	0	0	3	0	0	0	0	0	0	0	0	0	139.08	0	0.001	27.816	14.7636	0.125007	0.349364	d__Bacteria;p__Proteobacteria;c__Betaproteobacteria;o__Rhodocyclales;f__Azonexaceae;g__Azonexus;s__Azonexus fungiphilus
ASV11385	0	0	0	3	0	0	0	0	0	0	0	0	0	139.03	0	0	0	0	0	0	27.806	0.001	-14.7631	0.250007	0.441558	d__Bacteria;p__Proteobacteria;c__Gammaproteobacteria;o__Legionellales;f__Legionellaceae;g__Tatlockia;s__Tatlockia hackeliae
ASV11386	0	0	0	0	0	0	0	0	3	0	0	0	0	0	0	0	0	0	139.08	0	0.001	27.816	14.7636	0.125007	0.349364	d__Bacteria;p__Bacteroidetes;c__Chitinophagia;o__Chitinophagales;f__Chitinophagaceae;g__Puia;s__uncultured bacterium
ASV11387	0	0	0	0	0	0	0	0	3	0	0	0	0	0	0	0	0	0	139.08	0	0.001	27.816	14.7636	0.125007	0.349364	d__Bacteria;p__Proteobacteria;c__Alphaproteobacteria;o__Hyphomicrobiales;f__Methylocystaceae;g__Methylocystis;s__Methylocystis bryophila
ASV11388	0	0	0	3	0	0	0	0	0	0	0	0	0	139.03	0	0	0	0	0	0	27.806	0.001	-14.7631	0.250007	0.441558	d__Bacteria;p__Bacteroidetes;c__Sphingobacteriia;o__Sphingobacteriales;f__Sphingobacteriaceae;g__Mucilaginibacter;s__Mucilaginibacter sp013288235
ASV11389	0	0	0	0	0	0	0	0	0	3	0	0	0	0	0	0	0	0	0	134.21	0.001	26.842	14.7122	0.500005	0.551321	d__Bacteria;p__Acidobacteria;c__Acidobacteriia;o__Acidobacteriales;f__Acidobacteriaceae;g__Candidatus Koribacter;s__uncultured bacterium
ASV1139	16	0	0	0	0	0	0	0	0	0	708.75	0	0	0	0	0	0	0	0	0	141.75	0.001	-17.113	0.000244331	0.00670089	d__Bacteria;p__Fibrobacteres;c__Fibrobacteria;o__Fibrobacterales;f__Fibrobacteraceae;g__Fibrobacter
ASV11390	0	0	0	0	0	0	0	0	0	3	0	0	0	0	0	0	0	0	0	134.21	0.001	26.842	14.7122	0.500005	0.551321	d__Bacteria;p__Proteobacteria;c__Betaproteobacteria;o__Burkholderiales;f__Oxalobacteraceae;g__Duganella;s__Duganella sp000335815
ASV11391	0	0	0	0	0	0	3	0	0	0	0	0	0	0	0	0	126.77	0	0	0	0.001	25.354	14.6299	0.250007	0.441558	d__Bacteria;p__Proteobacteria;c__Deltaproteobacteria;o__Desulfuromonadales;f__Syntrophotaleaceae;g__Syntrophotalea;s__Syntrophotalea carbinolica
ASV11392	0	0	0	0	3	0	0	0	0	0	0	0	0	0	143.23	0	0	0	0	0	28.646	0.001	-14.806	0.0312547	0.205376	d__Bacteria;p__Proteobacteria;c__Betaproteobacteria;o__Burkholderiales;f__norank;g__Leptothrix;s__Leptothrix mobilis
ASV11393	0	0	0	0	0	0	3	0	0	0	0	0	0	0	0	0	126.77	0	0	0	0.001	25.354	14.6299	0.250007	0.441558	d__Bacteria;p__Proteobacteria;c__Gammaproteobacteria;o__Chromatiales;f__Woeseiaceae;g__Woeseia;s__uncultured bacterium
ASV11394	0	0	0	0	3	0	0	0	0	0	0	0	0	0	143.23	0	0	0	0	0	28.646	0.001	-14.806	0.0312547	0.205376	d__Bacteria;p__Proteobacteria;c__Betaproteobacteria;o__Burkholderiales;f__Burkholderiaceae;g__Paraburkholderia;s__Paraburkholderia sp013426895
ASV11395	0	0	0	0	0	0	3	0	0	0	0	0	0	0	0	0	126.77	0	0	0	0.001	25.354	14.6299	0.250007	0.441558	d__Bacteria;p__Proteobacteria;c__Alphaproteobacteria;o__Caulobacterales;f__Caulobacteraceae;g__Caulobacter;s__Caulobacter sp014207215
ASV11396	0	0	0	0	0	0	0	0	3	0	0	0	0	0	0	0	0	0	139.08	0	0.001	27.816	14.7636	0.125007	0.349364	d__Bacteria;p__Acidobacteria;c__Vicinamibacteria;o__norank;f__Vicinamibacteraceae;g__Luteitalea;s__Luteitalea pratensis
ASV11397	0	0	0	0	0	0	0	0	0	3	0	0	0	0	0	0	0	0	0	134.21	0.001	26.842	14.7122	0.500005	0.551321	d__Bacteria;p__Cyanobacteria;c__norank;o__Oscillatoriales;f__Coleofasciculaceae;g__Geitlerinema;s__Geitlerinema sp. PCC 7407
ASV11398	0	3	0	0	0	0	0	0	0	0	0	135.26	0	0	0	0	0	0	0	0	27.052	0.001	-14.7234	0.250007	0.441558	d__Bacteria;p__Acidobacteria;c__Vicinamibacteria;o__norank;f__Vicinamibacteraceae;g__Luteitalea;s__uncultured bacterium
ASV11399	3	0	0	0	0	0	0	0	0	0	132.89	0	0	0	0	0	0	0	0	0	26.578	0.001	-14.6979	0.250007	0.441558	d__Bacteria;p__Actinobacteria;c__Thermoleophilia;o__Solirubrobacterales;f__Conexibacteraceae;g__Conexibacter;s__uncultured bacterium
ASV114	0	0	0	0	71	0	0	0	0	0	0	0	0	0	3389.67	0	0	0	0	0	677.934	0.001	-19.3708	2.02715e-37	2.54488e-34	d__Bacteria;p__Proteobacteria;c__Betaproteobacteria;o__Rhodocyclales;f__Zoogloeaceae;g__Azoarcus;s__Azoarcus indigens
ASV1140	0	0	0	0	0	0	16	0	0	0	0	0	0	0	0	0	676.13	0	0	0	0.001	135.226	17.045	3.05542e-05	0.00121578	d__Bacteria;p__Actinobacteria;c__Acidimicrobiia;o__Acidimicrobiales;f__Ilumatobacteraceae;g__Desertimonas;s__Desertimonas flava
ASV11400	0	0	0	0	0	0	0	0	0	3	0	0	0	0	0	0	0	0	0	134.21	0.001	26.842	14.7122	0.500005	0.551321	d__Bacteria;p__Proteobacteria;c__Alphaproteobacteria;o__Hyphomicrobiales;f__Methylobacteriaceae;g__Microvirga;s__Microvirga sp009363855
ASV11401	0	0	0	0	3	0	0	0	0	0	0	0	0	0	143.23	0	0	0	0	0	28.646	0.001	-14.806	0.0312547	0.205376	d__Bacteria;p__Proteobacteria;c__Alphaproteobacteria;o__Hyphomicrobiales;f__Bradyrhizobiaceae;g__Bradyrhizobium
ASV11402	0	0	0	0	0	0	0	0	3	0	0	0	0	0	0	0	0	0	139.08	0	0.001	27.816	14.7636	0.125007	0.349364	d__Bacteria;p__Proteobacteria;c__Betaproteobacteria;o__Rhodocyclales;f__Rhodocyclaceae;g__Denitromonas;s__Denitromonas halophilus
ASV11403	0	0	0	0	3	0	0	0	0	0	0	0	0	0	143.23	0	0	0	0	0	28.646	0.001	-14.806	0.0312547	0.205376	d__Bacteria;p__Proteobacteria;c__Oligoflexia;o__Oligoflexales;f__Oligoflexaceae;g__Oligoflexus;s__Oligoflexus tunisiensis
ASV11404	0	0	0	0	3	0	0	0	0	0	0	0	0	0	143.23	0	0	0	0	0	28.646	0.001	-14.806	0.0312547	0.205376	d__Bacteria;p__Acidobacteria;c__Acidobacteriia;o__Bryobacterales;f__Solibacteraceae;g__Candidatus Solibacter;s__Solibacter usitatus
ASV11405	3	0	0	0	0	0	0	0	0	0	132.89	0	0	0	0	0	0	0	0	0	26.578	0.001	-14.6979	0.250007	0.441558	Unclassified
ASV11406	0	3	0	0	0	0	0	0	0	0	0	135.26	0	0	0	0	0	0	0	0	27.052	0.001	-14.7234	0.250007	0.441558	d__Bacteria;p__Proteobacteria;c__Gammaproteobacteria;o__Xanthomonadales;f__Xanthomonadaceae;g__Lysobacter;s__Lysobacter gummosus
ASV11407	0	0	0	3	0	0	0	0	0	0	0	0	0	139.03	0	0	0	0	0	0	27.806	0.001	-14.7631	0.250007	0.441558	d__Bacteria;p__Acidobacteria;c__Acidobacteriia;o__Acidobacteriales;f__Acidobacteriaceae;g__Terracidiphilus;s__Terracidiphilus sp903849645
ASV11408	0	0	3	0	0	0	0	0	0	0	0	0	126.54	0	0	0	0	0	0	0	25.308	0.001	-14.6273	0.500005	0.551321	d__Bacteria;p__Acidobacteria;c__Acidobacteriia;o__Acidobacteriales;f__Acidobacteriaceae;g__Candidatus Koribacter;s__uncultured bacterium
ASV11409	3	0	0	0	0	0	0	0	0	0	132.89	0	0	0	0	0	0	0	0	0	26.578	0.001	-14.6979	0.250007	0.441558	d__Bacteria;p__Gemmatimonadetes;c__Gemmatimonadetes;o__Gemmatimonadales;f__Gemmatimonadaceae;g__Gemmatimonas;s__Gemmatimonas phototrophica
ASV1141	0	0	0	0	16	0	0	0	0	0	0	0	0	0	763.87	0	0	0	0	0	152.774	0.001	-17.221	7.47879e-09	8.27213e-07	d__Bacteria;p__Proteobacteria;c__Alphaproteobacteria;o__Micropepsales;f__Micropepsaceae;g__Rhizomicrobium;s__Rhizomicrobium sp013149165
ASV11410	0	0	3	0	0	0	0	0	0	0	0	0	126.54	0	0	0	0	0	0	0	25.308	0.001	-14.6273	0.500005	0.551321	d__Bacteria;p__Acidobacteria;c__Acidobacteriia;o__Acidobacteriales;f__Acidobacteriaceae;g__Candidatus Koribacter;s__uncultured bacterium
ASV11411	0	3	0	0	0	0	0	0	0	0	0	135.26	0	0	0	0	0	0	0	0	27.052	0.001	-14.7234	0.250007	0.441558	d__Bacteria;p__Bacteroidetes;c__Chitinophagia;o__Chitinophagales;f__Chitinophagaceae;g__Edaphobaculum;s__metagenome
ASV11412	0	0	0	0	0	0	0	0	3	0	0	0	0	0	0	0	0	0	139.08	0	0.001	27.816	14.7636	0.125007	0.349364	d__Bacteria;p__Proteobacteria;c__Gammaproteobacteria;o__Pseudomonadales;f__Pseudomonadaceae;g__Pseudomonas;s__Pseudomonas putida
ASV11413	0	3	0	0	0	0	0	0	0	0	0	135.26	0	0	0	0	0	0	0	0	27.052	0.001	-14.7234	0.250007	0.441558	d__Bacteria;p__Bacteroidetes;c__Chitinophagia;o__Chitinophagales;f__Chitinophagaceae;g__Chitinophaga;s__Chitinophaga sp012516355
ASV11414	3	0	0	0	0	0	0	0	0	0	132.89	0	0	0	0	0	0	0	0	0	26.578	0.001	-14.6979	0.250007	0.441558	d__Bacteria;p__Acidobacteria;c__Acidobacteriia;o__Bryobacterales;f__Solibacteraceae;g__Candidatus Solibacter;s__Solibacter usitatus
ASV11415	0	0	0	0	0	0	0	0	0	3	0	0	0	0	0	0	0	0	0	134.21	0.001	26.842	14.7122	0.500005	0.551321	d__Bacteria;p__Fibrobacteres;c__Fibrobacteria;o__Fibrobacterales;f__Fibrobacteraceae;g__Fibrobacter;s__Fibrobacter sp900143055
ASV11416	0	0	3	0	0	0	0	0	0	0	0	0	126.54	0	0	0	0	0	0	0	25.308	0.001	-14.6273	0.500005	0.551321	d__Bacteria;p__Bacteroidetes;c__Sphingobacteriia;o__Sphingobacteriales;f__Sphingobacteriaceae;g__Pelobium
ASV11417	0	0	0	0	0	0	0	0	0	3	0	0	0	0	0	0	0	0	0	134.21	0.001	26.842	14.7122	0.500005	0.551321	d__Bacteria;p__Acidobacteria;c__Vicinamibacteria;o__norank;f__Vicinamibacteraceae;g__Luteitalea;s__Luteitalea pratensis
ASV11418	0	0	0	0	0	3	0	0	0	0	0	0	0	0	0	166.43	0	0	0	0	0.001	33.286	15.0226	0.125007	0.349364	d__Bacteria;p__Chloroflexi;c__Ktedonobacteria;o__Ktedonobacterales;f__Dictyobacteraceae;g__Dictyobacter;s__Dictyobacter vulcani
ASV11419	0	0	0	0	3	0	0	0	0	0	0	0	0	0	143.23	0	0	0	0	0	28.646	0.001	-14.806	0.0312547	0.205376	d__Bacteria;p__Proteobacteria;c__Alphaproteobacteria;o__Hyphomicrobiales;f__Hyphomicrobiaceae;g__Methyloceanibacter;s__uncultured bacterium
ASV1142	0	0	0	16	0	0	0	0	0	0	0	0	0	741.5	0	0	0	0	0	0	148.3	0.001	-17.1782	1.52796e-05	0.000680211	d__Bacteria;p__Proteobacteria;c__Betaproteobacteria;o__Burkholderiales;f__Burkholderiaceae;g__Caballeronia;s__Caballeronia cordobensis
ASV11420	0	0	0	0	0	3	0	0	0	0	0	0	0	0	0	166.43	0	0	0	0	0.001	33.286	15.0226	0.125007	0.349364	d__Bacteria;p__Proteobacteria;c__Gammaproteobacteria;o__Nevskiales;f__Steroidobacteraceae;g__Steroidobacter;s__uncultured bacterium
ASV11421	0	0	0	0	3	0	0	0	0	0	0	0	0	0	143.23	0	0	0	0	0	28.646	0.001	-14.806	0.0312547	0.205376	d__Bacteria;p__Planctomycetes;c__Planctomycetia;o__Gemmatales;f__Gemmataceae;g__Fimbriiglobus;s__Fimbriiglobus ruber
ASV11422	3	0	0	0	0	0	0	0	0	0	132.89	0	0	0	0	0	0	0	0	0	26.578	0.001	-14.6979	0.250007	0.441558	d__Bacteria;p__Proteobacteria;c__Gammaproteobacteria;o__Xanthomonadales;f__Xanthomonadaceae;g__Arenimonas;s__Arenimonas composti
ASV11423	0	0	3	0	0	0	0	0	0	0	0	0	126.54	0	0	0	0	0	0	0	25.308	0.001	-14.6273	0.500005	0.551321	d__Bacteria;p__Actinobacteria;c__Acidimicrobiia;o__Acidimicrobiales;f__Acidimicrobiaceae;g__Acidimicrobium;s__Acidimicrobium ferrooxidans
ASV11424	0	3	0	0	0	0	0	0	0	0	0	135.26	0	0	0	0	0	0	0	0	27.052	0.001	-14.7234	0.250007	0.441558	d__Bacteria;p__Planctomycetes;c__Planctomycetia;o__Gemmatales;f__Gemmataceae;g__Fimbriiglobus;s__Fimbriiglobus ruber
ASV11425	0	0	0	3	0	0	0	0	0	0	0	0	0	139.03	0	0	0	0	0	0	27.806	0.001	-14.7631	0.250007	0.441558	d__Bacteria;p__Bacteroidetes;c__Chitinophagia;o__Chitinophagales;f__Chitinophagaceae;g__Edaphobaculum;s__metagenome
ASV11426	0	3	0	0	0	0	0	0	0	0	0	135.26	0	0	0	0	0	0	0	0	27.052	0.001	-14.7234	0.250007	0.441558	d__Bacteria;p__Proteobacteria;c__Gammaproteobacteria;o__Xanthomonadales;f__Rhodanobacteraceae;g__Rhodanobacter;s__Rhodanobacter sp014200755
ASV11427	0	0	0	0	0	0	3	0	0	0	0	0	0	0	0	0	126.77	0	0	0	0.001	25.354	14.6299	0.250007	0.441558	d__Bacteria;p__Chloroflexi;c__Ktedonobacteria;o__Ktedonobacterales;f__Ktedonosporobacteraceae;g__Ktedonosporobacter;s__Ktedonosporobacter rubrisoli
ASV11428	3	0	0	0	0	0	0	0	0	0	132.89	0	0	0	0	0	0	0	0	0	26.578	0.001	-14.6979	0.250007	0.441558	d__Bacteria;p__Acidobacteria;c__Vicinamibacteria;o__norank;f__Vicinamibacteraceae;g__Luteitalea;s__uncultured bacterium
ASV11429	0	0	0	0	0	0	0	0	3	0	0	0	0	0	0	0	0	0	139.08	0	0.001	27.816	14.7636	0.125007	0.349364	d__Bacteria;p__Chloroflexi;c__Ktedonobacteria;o__Ktedonobacterales;f__Thermosporotrichaceae;g__Thermosporothrix;s__uncultured bacterium
ASV1143	0	0	0	16	0	0	0	0	0	0	0	0	0	741.5	0	0	0	0	0	0	148.3	0.001	-17.1782	1.52796e-05	0.000680211	d__Bacteria
ASV11430	0	3	0	0	0	0	0	0	0	0	0	135.26	0	0	0	0	0	0	0	0	27.052	0.001	-14.7234	0.250007	0.441558	d__Bacteria;p__Proteobacteria;c__Alphaproteobacteria;o__Micropepsales;f__Micropepsaceae;g__Rhizomicrobium;s__Rhizomicrobium sp013149165
ASV11431	0	0	0	0	3	0	0	0	0	0	0	0	0	0	143.23	0	0	0	0	0	28.646	0.001	-14.806	0.0312547	0.205376	d__Bacteria;p__Acidobacteria;c__Acidobacteriia;o__Acidobacteriales;f__Acidobacteriaceae;g__Candidatus Koribacter;s__uncultured bacterium
ASV11432	0	3	0	0	0	0	0	0	0	0	0	135.26	0	0	0	0	0	0	0	0	27.052	0.001	-14.7234	0.250007	0.441558	d__Bacteria;p__Planctomycetes;c__Phycisphaerae;o__Tepidisphaerales;f__Tepidisphaeraceae;g__Tepidisphaera;s__uncultured bacterium
ASV11433	0	3	0	0	0	0	0	0	0	0	0	135.26	0	0	0	0	0	0	0	0	27.052	0.001	-14.7234	0.250007	0.441558	d__Bacteria;p__Acidobacteria;c__Acidobacteriia;o__Acidobacteriales;f__Acidobacteriaceae;g__Candidatus Koribacter;s__Koribacter versatilis
ASV11434	0	0	0	0	0	0	0	0	0	3	0	0	0	0	0	0	0	0	0	134.21	0.001	26.842	14.7122	0.500005	0.551321	d__Bacteria;p__Planctomycetes;c__Planctomycetia;o__Pirellulales;f__Lacipirellulaceae;g__Lacipirellula
ASV11435	0	0	3	0	0	0	0	0	0	0	0	0	126.54	0	0	0	0	0	0	0	25.308	0.001	-14.6273	0.500005	0.551321	d__Bacteria;p__Bacteroidetes;c__Chitinophagia;o__Chitinophagales;f__Chitinophagaceae;g__Puia;s__uncultured bacterium
ASV11436	0	0	0	0	0	0	0	0	0	3	0	0	0	0	0	0	0	0	0	134.21	0.001	26.842	14.7122	0.500005	0.551321	d__Bacteria;p__Proteobacteria;c__Alphaproteobacteria;o__Hyphomicrobiales;f__Reyranellaceae;g__Reyranella;s__uncultured bacterium
ASV11437	3	0	0	0	0	0	0	0	0	0	132.89	0	0	0	0	0	0	0	0	0	26.578	0.001	-14.6979	0.250007	0.441558	d__Bacteria;p__Elusimicrobia;c__Endomicrobia;o__Endomicrobiales;f__Endomicrobiaceae;g__Endomicrobium;s__uncultured rumen bacterium
ASV11438	0	0	3	0	0	0	0	0	0	0	0	0	126.54	0	0	0	0	0	0	0	25.308	0.001	-14.6273	0.500005	0.551321	d__Bacteria;p__Proteobacteria;c__Alphaproteobacteria;o__Hyphomicrobiales;f__Bradyrhizobiaceae;g__Bradyrhizobium;s__Bradyrhizobium canariense
ASV11439	0	0	0	0	0	0	3	0	0	0	0	0	0	0	0	0	126.77	0	0	0	0.001	25.354	14.6299	0.250007	0.441558	d__Bacteria;p__Actinobacteria;c__Thermoleophilia;o__Solirubrobacterales;f__Solirubrobacteraceae;g__Solirubrobacter
ASV1144	0	0	0	0	0	0	0	0	16	0	0	0	0	0	0	0	0	0	741.74	0	0.001	148.348	17.1786	3.82122e-06	0.000205887	d__Bacteria;p__Acidobacteria;c__Acidobacteriia;o__Acidobacteriales;f__Acidobacteriaceae;g__Candidatus Koribacter;s__uncultured Acidobacteria bacterium
ASV11440	0	0	0	0	3	0	0	0	0	0	0	0	0	0	143.23	0	0	0	0	0	28.646	0.001	-14.806	0.0312547	0.205376	d__Bacteria;p__Planctomycetes;c__Planctomycetia;o__Gemmatales;f__Gemmataceae;g__Fimbriiglobus;s__uncultured Gemmata sp.
ASV11441	0	0	0	0	0	0	0	0	3	0	0	0	0	0	0	0	0	0	139.08	0	0.001	27.816	14.7636	0.125007	0.349364	d__Bacteria;p__Acidobacteria;c__Acidobacteriia;o__Acidobacteriales;f__Acidobacteriaceae;g__Occallatibacter;s__uncultured bacterium
ASV11442	3	0	0	0	0	0	0	0	0	0	132.89	0	0	0	0	0	0	0	0	0	26.578	0.001	-14.6979	0.250007	0.441558	d__Bacteria;p__Actinobacteria;c__Actinomycetia;o__Micrococcales;f__Micrococcaceae;g__Paenarthrobacter;s__Paenarthrobacter sp000526335
ASV11443	3	0	0	0	0	0	0	0	0	0	132.89	0	0	0	0	0	0	0	0	0	26.578	0.001	-14.6979	0.250007	0.441558	d__Bacteria;p__Proteobacteria;c__Deltaproteobacteria;o__Myxococcales;f__Labilitrichaceae;g__Labilithrix;s__Labilithrix luteola
ASV11444	0	0	0	0	0	0	0	0	3	0	0	0	0	0	0	0	0	0	139.08	0	0.001	27.816	14.7636	0.125007	0.349364	d__Bacteria;p__Planctomycetes;c__Planctomycetia;o__Isosphaerales;f__Isosphaeraceae;g__Aquisphaera;s__Aquisphaera giovannonii
ASV11445	3	0	0	0	0	0	0	0	0	0	132.89	0	0	0	0	0	0	0	0	0	26.578	0.001	-14.6979	0.250007	0.441558	d__Bacteria;p__Acidobacteria;c__Acidobacteriia;o__Bryobacterales;f__Bryobacteraceae;g__Bryobacter;s__uncultured Acidobacteria bacterium
ASV11446	0	0	0	0	0	0	3	0	0	0	0	0	0	0	0	0	126.77	0	0	0	0.001	25.354	14.6299	0.250007	0.441558	d__Bacteria;p__Proteobacteria;c__Alphaproteobacteria;o__Rhodospirillales;f__Acetobacteraceae;g__Acidicaldus
ASV11447	0	0	0	0	0	0	0	0	3	0	0	0	0	0	0	0	0	0	139.08	0	0.001	27.816	14.7636	0.125007	0.349364	d__Bacteria;p__Proteobacteria;c__Gammaproteobacteria;o__Pseudomonadales;f__Pseudomonadaceae;g__Pseudomonas;s__Pseudomonas putida
ASV11448	0	0	0	0	0	0	3	0	0	0	0	0	0	0	0	0	126.77	0	0	0	0.001	25.354	14.6299	0.250007	0.441558	d__Bacteria;p__Proteobacteria;c__Deltaproteobacteria;o__Myxococcales;f__Labilitrichaceae;g__Labilithrix;s__Labilithrix luteola
ASV11449	0	0	0	0	3	0	0	0	0	0	0	0	0	0	143.23	0	0	0	0	0	28.646	0.001	-14.806	0.0312547	0.205376	d__Bacteria;p__Proteobacteria;c__Gammaproteobacteria;o__Xanthomonadales;f__Rhodanobacteraceae;g__Rhodanobacter;s__uncultured bacterium
ASV1145	0	0	0	0	0	0	0	0	16	0	0	0	0	0	0	0	0	0	741.74	0	0.001	148.348	17.1786	3.82122e-06	0.000205887	d__Bacteria;p__Bacteroidetes;c__Chitinophagia;o__Chitinophagales;f__Chitinophagaceae;g__Flavisolibacter;s__Flavisolibacter sp013327885
ASV11450	0	0	0	0	0	0	0	0	3	0	0	0	0	0	0	0	0	0	139.08	0	0.001	27.816	14.7636	0.125007	0.349364	d__Bacteria;p__Proteobacteria;c__Betaproteobacteria;o__Burkholderiales;f__Burkholderiaceae;g__Paraburkholderia;s__Paraburkholderia sp013426895
ASV11451	0	0	0	3	0	0	0	0	0	0	0	0	0	139.03	0	0	0	0	0	0	27.806	0.001	-14.7631	0.250007	0.441558	d__Bacteria;p__Acidobacteria;c__Acidobacteriia;o__Acidobacteriales;f__Acidobacteriaceae;g__Candidatus Koribacter;s__Koribacter versatilis
ASV11452	0	0	0	3	0	0	0	0	0	0	0	0	0	139.03	0	0	0	0	0	0	27.806	0.001	-14.7631	0.250007	0.441558	d__Bacteria;p__Proteobacteria;c__Alphaproteobacteria;o__Caulobacterales;f__Caulobacteraceae;g__Terricaulis;s__Terricaulis sp001464425
ASV11453	0	0	0	0	0	0	3	0	0	0	0	0	0	0	0	0	126.77	0	0	0	0.001	25.354	14.6299	0.250007	0.441558	d__Bacteria;p__Acidobacteria;c__Vicinamibacteria;o__norank;f__Vicinamibacteraceae;g__Luteitalea
ASV11454	3	0	0	0	0	0	0	0	0	0	132.89	0	0	0	0	0	0	0	0	0	26.578	0.001	-14.6979	0.250007	0.441558	d__Bacteria;p__Proteobacteria;c__Betaproteobacteria;o__Burkholderiales;f__Comamonadaceae;g__Rhodoferax;s__Rhodoferax sp006974105
ASV11455	0	3	0	0	0	0	0	0	0	0	0	135.26	0	0	0	0	0	0	0	0	27.052	0.001	-14.7234	0.250007	0.441558	d__Bacteria;p__Proteobacteria;c__Betaproteobacteria;o__Burkholderiales;f__Burkholderiaceae;g__Paraburkholderia;s__Paraburkholderia unamae
ASV11456	0	0	3	0	0	0	0	0	0	0	0	0	126.54	0	0	0	0	0	0	0	25.308	0.001	-14.6273	0.500005	0.551321	d__Bacteria;p__Proteobacteria;c__Betaproteobacteria;o__Rhodocyclales;f__Zoogloeaceae;g__Azoarcus;s__Azoarcus indigens
ASV11457	0	0	3	0	0	0	0	0	0	0	0	0	126.54	0	0	0	0	0	0	0	25.308	0.001	-14.6273	0.500005	0.551321	d__Bacteria;p__Proteobacteria;c__Betaproteobacteria;o__Burkholderiales;f__Comamonadaceae;g__Rhodoferax;s__Rhodoferax sp002943465
ASV11458	0	0	0	0	0	0	0	0	3	0	0	0	0	0	0	0	0	0	139.08	0	0.001	27.816	14.7636	0.125007	0.349364	Unclassified
ASV11459	0	0	0	0	0	0	0	0	0	3	0	0	0	0	0	0	0	0	0	134.21	0.001	26.842	14.7122	0.500005	0.551321	d__Bacteria;p__Proteobacteria;c__Gammaproteobacteria;o__Xanthomonadales;f__Rhodanobacteraceae;g__Rhodanobacter;s__uncultured bacterium
ASV1146	0	16	0	0	0	0	0	0	0	0	0	721.4	0	0	0	0	0	0	0	0	144.28	0.001	-17.1385	1.52796e-05	0.000680211	d__Bacteria;p__Gemmatimonadetes;c__Gemmatimonadetes;o__Gemmatimonadales;f__Gemmatimonadaceae;g__Gemmatimonas;s__Gemmatimonas aurantiaca
ASV11460	0	0	0	0	3	0	0	0	0	0	0	0	0	0	143.23	0	0	0	0	0	28.646	0.001	-14.806	0.0312547	0.205376	d__Bacteria;p__Acidobacteria;c__Acidobacteriia;o__Acidobacteriales;f__Acidobacteriaceae;g__Occallatibacter
ASV11461	0	0	0	0	0	0	0	0	3	0	0	0	0	0	0	0	0	0	139.08	0	0.001	27.816	14.7636	0.125007	0.349364	d__Bacteria;p__Planctomycetes;c__Phycisphaerae;o__Tepidisphaerales;f__Tepidisphaeraceae;g__Tepidisphaera;s__uncultured bacterium
ASV11462	0	0	0	0	0	0	0	0	3	0	0	0	0	0	0	0	0	0	139.08	0	0.001	27.816	14.7636	0.125007	0.349364	d__Bacteria;p__Proteobacteria;c__Betaproteobacteria;o__norank;f__Casimicrobiaceae;g__Casimicrobium;s__Casimicrobium huifangae
ASV11463	0	0	0	0	0	0	0	0	3	0	0	0	0	0	0	0	0	0	139.08	0	0.001	27.816	14.7636	0.125007	0.349364	d__Bacteria;p__Planctomycetes;c__Planctomycetia;o__Gemmatales;f__Gemmataceae;g__Limnoglobus;s__Limnoglobus roseus
ASV11464	0	0	0	0	0	0	3	0	0	0	0	0	0	0	0	0	126.77	0	0	0	0.001	25.354	14.6299	0.250007	0.441558	d__Bacteria;p__Acidobacteria;c__Vicinamibacteria;o__norank;f__Vicinamibacteraceae;g__Luteitalea;s__Luteitalea pratensis
ASV11465	3	0	0	0	0	0	0	0	0	0	132.89	0	0	0	0	0	0	0	0	0	26.578	0.001	-14.6979	0.250007	0.441558	d__Bacteria;p__Actinobacteria;c__Acidimicrobiia;o__Acidimicrobiales;f__Ilumatobacteraceae;g__Desertimonas;s__Desertimonas flava
ASV11466	3	0	0	0	0	0	0	0	0	0	132.89	0	0	0	0	0	0	0	0	0	26.578	0.001	-14.6979	0.250007	0.441558	Unclassified
ASV11467	0	3	0	0	0	0	0	0	0	0	0	135.26	0	0	0	0	0	0	0	0	27.052	0.001	-14.7234	0.250007	0.441558	d__Bacteria;p__Proteobacteria;c__Alphaproteobacteria;o__Hyphomicrobiales;f__Rhizobiaceae;g__Rhizobium;s__Rhizobium sp900469615
ASV11468	0	0	0	0	3	0	0	0	0	0	0	0	0	0	143.23	0	0	0	0	0	28.646	0.001	-14.806	0.0312547	0.205376	d__Bacteria;p__Verrucomicrobia;c__Verrucomicrobiae;o__Verrucomicrobiales;f__Verrucomicrobia subdivision 3;g__Pedosphaera;s__uncultured bacterium
ASV11469	0	0	0	0	3	0	0	0	0	0	0	0	0	0	143.23	0	0	0	0	0	28.646	0.001	-14.806	0.0312547	0.205376	Unclassified
ASV1147	0	16	0	0	0	0	0	0	0	0	0	721.4	0	0	0	0	0	0	0	0	144.28	0.001	-17.1385	1.52796e-05	0.000680211	d__Bacteria;p__Proteobacteria;c__Alphaproteobacteria;o__Micropepsales;f__Micropepsaceae;g__Rhizomicrobium;s__Rhizomicrobium sp013149165
ASV11470	0	0	0	0	3	0	0	0	0	0	0	0	0	0	143.23	0	0	0	0	0	28.646	0.001	-14.806	0.0312547	0.205376	d__Bacteria;p__Bacteroidetes;c__Chitinophagia;o__Chitinophagales;f__Chitinophagaceae
ASV11471	0	0	0	0	0	0	0	0	3	0	0	0	0	0	0	0	0	0	139.08	0	0.001	27.816	14.7636	0.125007	0.349364	d__Bacteria;p__Proteobacteria;c__Betaproteobacteria;o__Burkholderiales;f__Oxalobacteraceae;g__Noviherbaspirillum;s__Noviherbaspirillum sp003591035
ASV11472	0	0	0	0	0	0	0	0	3	0	0	0	0	0	0	0	0	0	139.08	0	0.001	27.816	14.7636	0.125007	0.349364	d__Bacteria;p__Planctomycetes;c__Planctomycetia;o__Gemmatales;f__Gemmataceae;g__Fimbriiglobus;s__Fimbriiglobus ruber
ASV11473	0	3	0	0	0	0	0	0	0	0	0	135.26	0	0	0	0	0	0	0	0	27.052	0.001	-14.7234	0.250007	0.441558	d__Bacteria;p__Proteobacteria;c__Betaproteobacteria;o__Burkholderiales;f__Comamonadaceae;g__Variovorax;s__Variovorax gossypii
ASV11474	0	0	0	0	0	0	0	0	0	3	0	0	0	0	0	0	0	0	0	134.21	0.001	26.842	14.7122	0.500005	0.551321	d__Bacteria;p__Proteobacteria;c__Betaproteobacteria;o__Neisseriales;f__Chromobacteriaceae;g__Chromobacterium;s__Chromobacterium amazonense
ASV11475	0	0	0	0	0	0	0	0	3	0	0	0	0	0	0	0	0	0	139.08	0	0.001	27.816	14.7636	0.125007	0.349364	d__Bacteria;p__Proteobacteria;c__Alphaproteobacteria;o__Hyphomicrobiales;f__Hyphomicrobiaceae;g__Rhodoplanes;s__Rhodoplanes serenus
ASV11476	0	0	0	0	0	0	3	0	0	0	0	0	0	0	0	0	126.77	0	0	0	0.001	25.354	14.6299	0.250007	0.441558	d__Bacteria;p__Bacteroidetes;c__Chitinophagia;o__Chitinophagales;f__Chitinophagaceae;g__Puia;s__uncultured bacterium
ASV11477	0	0	0	0	3	0	0	0	0	0	0	0	0	0	143.23	0	0	0	0	0	28.646	0.001	-14.806	0.0312547	0.205376	d__Bacteria;p__Proteobacteria;c__Alphaproteobacteria;o__Hyphomicrobiales;f__Devosiaceae;g__Devosia;s__uncultured bacterium
ASV11478	0	3	0	0	0	0	0	0	0	0	0	135.26	0	0	0	0	0	0	0	0	27.052	0.001	-14.7234	0.250007	0.441558	d__Bacteria;p__Acidobacteria;c__Acidobacteriia;o__Bryobacterales;f__Bryobacteraceae;g__Bryobacter;s__uncultured bacterium
ASV11479	3	0	0	0	0	0	0	0	0	0	132.89	0	0	0	0	0	0	0	0	0	26.578	0.001	-14.6979	0.250007	0.441558	d__Bacteria;p__Bacteroidetes;c__Cytophagia;o__Cytophagales;f__Fulvivirgaceae;g__Ohtaekwangia;s__Ohtaekwangia koreensis
ASV1148	0	16	0	0	0	0	0	0	0	0	0	721.4	0	0	0	0	0	0	0	0	144.28	0.001	-17.1385	1.52796e-05	0.000680211	d__Bacteria;p__Proteobacteria;c__Betaproteobacteria;o__Nitrosomonadales;f__Sterolibacteriaceae;g__Methyloversatilis;s__Methyloversatilis sp001713355
ASV11480	0	0	0	3	0	0	0	0	0	0	0	0	0	139.03	0	0	0	0	0	0	27.806	0.001	-14.7631	0.250007	0.441558	d__Bacteria;p__Actinobacteria;c__Actinomycetia;o__Streptosporangiales;f__Thermomonosporaceae;g__Actinocorallia;s__Actinocorallia herbida
ASV11481	0	0	0	3	0	0	0	0	0	0	0	0	0	139.03	0	0	0	0	0	0	27.806	0.001	-14.7631	0.250007	0.441558	d__Bacteria;p__Proteobacteria;c__Epsilonproteobacteria;o__Campylobacterales;f__Campylobacteraceae;g__Sulfurospirillum;s__Sulfurospirillum halorespirans
ASV11482	0	0	0	0	3	0	0	0	0	0	0	0	0	0	143.23	0	0	0	0	0	28.646	0.001	-14.806	0.0312547	0.205376	d__Bacteria;p__Proteobacteria;c__Deltaproteobacteria;o__Desulfuromonadales;f__Syntrophotaleaceae;g__Syntrophotalea;s__Syntrophotalea acetylenica
ASV11483	0	3	0	0	0	0	0	0	0	0	0	135.26	0	0	0	0	0	0	0	0	27.052	0.001	-14.7234	0.250007	0.441558	d__Bacteria;p__Verrucomicrobia;c__Verrucomicrobiae;o__Verrucomicrobiales;f__Verrucomicrobia subdivision 3;g__Pedosphaera
ASV11484	0	0	0	3	0	0	0	0	0	0	0	0	0	139.03	0	0	0	0	0	0	27.806	0.001	-14.7631	0.250007	0.441558	d__Bacteria;p__Proteobacteria;c__Betaproteobacteria;o__Burkholderiales;f__Oxalobacteraceae;g__Pseudoduganella;s__Pseudoduganella umbonata
ASV11485	0	0	0	0	0	0	0	0	3	0	0	0	0	0	0	0	0	0	139.08	0	0.001	27.816	14.7636	0.125007	0.349364	d__Bacteria;p__Planctomycetes;c__Planctomycetia;o__Pirellulales;f__Pirellulaceae;g__Rhodopirellula;s__uncultured bacterium
ASV11486	0	0	0	0	0	0	3	0	0	0	0	0	0	0	0	0	126.77	0	0	0	0.001	25.354	14.6299	0.250007	0.441558	d__Bacteria;p__Planctomycetes;c__Planctomycetia;o__Gemmatales;f__Gemmataceae;g__Fimbriiglobus;s__Fimbriiglobus ruber
ASV11487	3	0	0	0	0	0	0	0	0	0	132.89	0	0	0	0	0	0	0	0	0	26.578	0.001	-14.6979	0.250007	0.441558	d__Bacteria;p__Acidobacteria;c__Acidobacteriia;o__Bryobacterales;f__Solibacteraceae;g__Candidatus Solibacter;s__Solibacter usitatus
ASV11488	0	0	0	0	0	0	0	0	3	0	0	0	0	0	0	0	0	0	139.08	0	0.001	27.816	14.7636	0.125007	0.349364	d__Bacteria;p__Bacteroidetes;c__Sphingobacteriia;o__Sphingobacteriales;f__Sphingobacteriaceae;g__Solitalea;s__Solitalea canadensis
ASV11489	0	0	0	0	0	0	0	0	3	0	0	0	0	0	0	0	0	0	139.08	0	0.001	27.816	14.7636	0.125007	0.349364	d__Bacteria;p__Proteobacteria;c__Alphaproteobacteria;o__Hyphomicrobiales;f__Hyphomicrobiaceae;g__Rhodoplanes;s__uncultured bacterium
ASV1149	0	0	0	0	0	0	0	0	0	16	0	0	0	0	0	0	0	0	0	715.79	0.001	143.158	17.1272	0.000488604	0.0120038	d__Bacteria;p__Proteobacteria;c__Alphaproteobacteria;o__Micropepsales;f__Micropepsaceae;g__Rhizomicrobium;s__Rhizomicrobium sp013149165
ASV11490	0	0	3	0	0	0	0	0	0	0	0	0	126.54	0	0	0	0	0	0	0	25.308	0.001	-14.6273	0.500005	0.551321	d__Bacteria;p__Actinobacteria;c__Rubrobacteria;o__Gaiellales;f__Gaiellaceae;g__Gaiella;s__uncultured bacterium
ASV11491	0	0	0	0	0	3	0	0	0	0	0	0	0	0	0	166.43	0	0	0	0	0.001	33.286	15.0226	0.125007	0.349364	d__Bacteria;p__Bacteroidetes;c__Chitinophagia;o__Chitinophagales;f__Chitinophagaceae;g__Flavisolibacter
ASV11492	0	0	3	0	0	0	0	0	0	0	0	0	126.54	0	0	0	0	0	0	0	25.308	0.001	-14.6273	0.500005	0.551321	d__Bacteria;p__Proteobacteria;c__Gammaproteobacteria;o__Enterobacterales;f__Enterobacteriaceae;g__Kluyvera;s__Kluyvera intermedia
ASV11493	3	0	0	0	0	0	0	0	0	0	132.89	0	0	0	0	0	0	0	0	0	26.578	0.001	-14.6979	0.250007	0.441558	d__Bacteria;p__Cyanobacteria;c__norank;o__Chroococcales;f__Microcystaceae;g__Microcystis;s__Microcystis sp002282935
ASV11494	3	0	0	0	0	0	0	0	0	0	132.89	0	0	0	0	0	0	0	0	0	26.578	0.001	-14.6979	0.250007	0.441558	Unclassified
ASV11495	0	0	0	0	0	0	0	0	3	0	0	0	0	0	0	0	0	0	139.08	0	0.001	27.816	14.7636	0.125007	0.349364	d__Bacteria;p__Proteobacteria;c__Oligoflexia;o__Bdellovibrionales;f__Bdellovibrionaceae;g__Bdellovibrio;s__Bdellovibrio sp006874645
ASV11496	0	0	0	0	0	0	0	0	0	3	0	0	0	0	0	0	0	0	0	134.21	0.001	26.842	14.7122	0.500005	0.551321	d__Bacteria;p__Bacteroidetes;c__Chitinophagia;o__Chitinophagales;f__Chitinophagaceae;g__Ferruginibacter;s__uncultured bacterium
ASV11497	0	0	0	3	0	0	0	0	0	0	0	0	0	139.03	0	0	0	0	0	0	27.806	0.001	-14.7631	0.250007	0.441558	d__Bacteria;p__Planctomycetes;c__Planctomycetia;o__Isosphaerales;f__Isosphaeraceae;g__Singulisphaera;s__Singulisphaera sp900129635
ASV11498	0	0	0	0	0	0	0	0	3	0	0	0	0	0	0	0	0	0	139.08	0	0.001	27.816	14.7636	0.125007	0.349364	d__Bacteria;p__Bacteroidetes;c__Chitinophagia;o__Chitinophagales;f__Chitinophagaceae;g__Puia;s__Puia sp013286315
ASV11499	0	3	0	0	0	0	0	0	0	0	0	135.26	0	0	0	0	0	0	0	0	27.052	0.001	-14.7234	0.250007	0.441558	d__Bacteria;p__Proteobacteria;c__Betaproteobacteria;o__Burkholderiales;f__norank;g__Leptothrix;s__Leptothrix mobilis
ASV115	0	0	0	0	0	0	0	0	0	71	0	0	0	0	0	0	0	0	0	3176.31	0.001	635.262	19.277	1.12622e-16	3.72066e-14	d__Bacteria;p__Acidobacteria;c__Vicinamibacteria;o__norank;f__Vicinamibacteraceae;g__Luteitalea;s__Luteitalea pratensis
ASV1150	0	0	0	0	0	0	16	0	0	0	0	0	0	0	0	0	676.13	0	0	0	0.001	135.226	17.045	3.05542e-05	0.00121578	d__Bacteria;p__Planctomycetes;c__Phycisphaerae;o__Phycisphaerales;f__Phycisphaeraceae;g__Algisphaera
ASV11500	0	0	0	0	0	0	0	0	3	0	0	0	0	0	0	0	0	0	139.08	0	0.001	27.816	14.7636	0.125007	0.349364	d__Bacteria;p__Verrucomicrobia;c__Spartobacteria;o__Chthoniobacterales;f__Chthoniobacteraceae;g__Chthoniobacter;s__Chthoniobacter flavus
ASV11501	0	0	0	0	0	3	0	0	0	0	0	0	0	0	0	166.43	0	0	0	0	0.001	33.286	15.0226	0.125007	0.349364	d__Bacteria;p__Proteobacteria;c__Gammaproteobacteria;o__Xanthomonadales;f__Xanthomonadaceae;g__Luteimonas;s__Luteimonas abyssi
ASV11502	0	3	0	0	0	0	0	0	0	0	0	135.26	0	0	0	0	0	0	0	0	27.052	0.001	-14.7234	0.250007	0.441558	d__Bacteria;p__Bacteroidetes;c__Sphingobacteriia;o__Sphingobacteriales;f__Sphingobacteriaceae;g__Mucilaginibacter;s__Mucilaginibacter ginsenosidivorans
ASV11503	0	0	0	0	0	0	0	0	0	3	0	0	0	0	0	0	0	0	0	134.21	0.001	26.842	14.7122	0.500005	0.551321	d__Bacteria;p__Acidobacteria;c__Vicinamibacteria;o__norank;f__Vicinamibacteraceae;g__Luteitalea;s__Luteitalea pratensis
ASV11504	0	0	0	0	0	0	0	0	3	0	0	0	0	0	0	0	0	0	139.08	0	0.001	27.816	14.7636	0.125007	0.349364	d__Bacteria;p__Nitrospirae;c__Nitrospira;o__norank;f__norank;g__norank;s__metagenome
ASV11505	0	0	0	0	0	0	0	0	3	0	0	0	0	0	0	0	0	0	139.08	0	0.001	27.816	14.7636	0.125007	0.349364	d__Bacteria;p__Proteobacteria;c__Alphaproteobacteria;o__Hyphomicrobiales;f__Bradyrhizobiaceae;g__Bradyrhizobium
ASV11506	0	0	0	0	0	0	0	0	0	3	0	0	0	0	0	0	0	0	0	134.21	0.001	26.842	14.7122	0.500005	0.551321	d__Bacteria;p__Proteobacteria;c__Alphaproteobacteria;o__Rhodospirillales;f__Rhodospirillaceae;g__Hypericibacter;s__Hypericibacter terrae
ASV11507	0	3	0	0	0	0	0	0	0	0	0	135.26	0	0	0	0	0	0	0	0	27.052	0.001	-14.7234	0.250007	0.441558	d__Bacteria;p__Planctomycetes;c__Planctomycetia;o__Planctomycetales;f__Planctomycetaceae;g__Schlesneria;s__Schlesneria sp903904835
ASV11508	0	0	0	0	3	0	0	0	0	0	0	0	0	0	143.23	0	0	0	0	0	28.646	0.001	-14.806	0.0312547	0.205376	d__Bacteria;p__Proteobacteria;c__Betaproteobacteria;o__Burkholderiales;f__Comamonadaceae;g__Ramlibacter;s__Ramlibacter lithotrophicus
ASV11509	0	0	0	3	0	0	0	0	0	0	0	0	0	139.03	0	0	0	0	0	0	27.806	0.001	-14.7631	0.250007	0.441558	d__Bacteria;p__Acidobacteria;c__Thermoanaerobaculia;o__Thermoanaerobaculales;f__Thermoanaerobaculaceae;g__Thermoanaerobaculum;s__uncultured bacterium
ASV1151	0	0	0	16	0	0	0	0	0	0	0	0	0	741.5	0	0	0	0	0	0	148.3	0.001	-17.1782	1.52796e-05	0.000680211	d__Bacteria;p__Proteobacteria;c__Alphaproteobacteria;o__Hyphomicrobiales;f__norank;g__Pseudorhodoplanes;s__Pseudorhodoplanes sinuspersici
ASV11510	0	0	0	0	0	0	0	0	0	3	0	0	0	0	0	0	0	0	0	134.21	0.001	26.842	14.7122	0.500005	0.551321	d__Bacteria;p__Proteobacteria;c__Gammaproteobacteria;o__norank;f__norank;g__Acidibacter;s__uncultured bacterium
ASV11511	0	0	3	0	0	0	0	0	0	0	0	0	126.54	0	0	0	0	0	0	0	25.308	0.001	-14.6273	0.500005	0.551321	d__Bacteria;p__Proteobacteria;c__Alphaproteobacteria;o__Hyphomicrobiales;f__Bradyrhizobiaceae;g__Bradyrhizobium;s__uncultured bacterium
ASV11512	3	0	0	0	0	0	0	0	0	0	132.89	0	0	0	0	0	0	0	0	0	26.578	0.001	-14.6979	0.250007	0.441558	d__Bacteria;p__Bacteroidetes;c__Chitinophagia;o__Chitinophagales;f__Chitinophagaceae;g__Terrimonas;s__Terrimonas ferruginea
ASV11513	0	0	0	0	0	0	0	0	0	3	0	0	0	0	0	0	0	0	0	134.21	0.001	26.842	14.7122	0.500005	0.551321	d__Bacteria;p__Acidobacteria;c__Acidobacteriia;o__Acidobacteriales;f__Acidobacteriaceae;g__Silvibacterium;s__Silvibacterium bohemicum
ASV11514	3	0	0	0	0	0	0	0	0	0	132.89	0	0	0	0	0	0	0	0	0	26.578	0.001	-14.6979	0.250007	0.441558	d__Bacteria;p__Bacteroidetes;c__Cytophagia;o__Cytophagales;f__Fulvivirgaceae;g__Ohtaekwangia;s__Ohtaekwangia koreensis
ASV11515	0	0	0	0	0	0	0	0	3	0	0	0	0	0	0	0	0	0	139.08	0	0.001	27.816	14.7636	0.125007	0.349364	d__Bacteria;p__Acidobacteria;c__Vicinamibacteria;o__norank;f__Vicinamibacteraceae;g__Vicinamibacter;s__uncultured bacterium
ASV11516	3	0	0	0	0	0	0	0	0	0	132.89	0	0	0	0	0	0	0	0	0	26.578	0.001	-14.6979	0.250007	0.441558	d__Bacteria;p__Planctomycetes;c__Planctomycetia;o__Pirellulales;f__Pirellulaceae;g__Rhodopirellula;s__uncultured planctomycete
ASV11517	0	0	0	0	0	0	3	0	0	0	0	0	0	0	0	0	126.77	0	0	0	0.001	25.354	14.6299	0.250007	0.441558	d__Bacteria;p__Planctomycetes;c__Planctomycetia;o__Gemmatales;f__Gemmataceae;g__Gemmata;s__uncultured bacterium
ASV11518	0	0	0	0	0	0	0	0	3	0	0	0	0	0	0	0	0	0	139.08	0	0.001	27.816	14.7636	0.125007	0.349364	d__Bacteria;p__Acidobacteria;c__Acidobacteriia;o__Acidobacteriales;f__Acidobacteriaceae;g__Candidatus Koribacter;s__uncultured bacterium
ASV11519	0	0	0	0	0	0	0	0	3	0	0	0	0	0	0	0	0	0	139.08	0	0.001	27.816	14.7636	0.125007	0.349364	d__Bacteria;p__Acidobacteria;c__Vicinamibacteria;o__norank;f__Vicinamibacteraceae;g__Luteitalea;s__Luteitalea pratensis
ASV1152	16	0	0	0	0	0	0	0	0	0	708.75	0	0	0	0	0	0	0	0	0	141.75	0.001	-17.113	0.000244331	0.00670089	d__Bacteria;p__Proteobacteria;c__Gammaproteobacteria;o__norank;f__norank;g__Acidibacter;s__uncultured gamma proteobacterium
ASV11520	0	0	0	0	0	0	0	0	3	0	0	0	0	0	0	0	0	0	139.08	0	0.001	27.816	14.7636	0.125007	0.349364	d__Bacteria;p__Acidobacteria;c__Acidobacteriia;o__Acidobacteriales;f__Acidobacteriaceae;g__Silvibacterium;s__Silvibacterium dinghuense
ASV11521	3	0	0	0	0	0	0	0	0	0	132.89	0	0	0	0	0	0	0	0	0	26.578	0.001	-14.6979	0.250007	0.441558	d__Bacteria;p__Verrucomicrobia;c__Spartobacteria;o__Chthoniobacterales;f__Chthoniobacteraceae;g__Chthoniobacter;s__Chthoniobacter flavus
ASV11522	0	0	0	3	0	0	0	0	0	0	0	0	0	139.03	0	0	0	0	0	0	27.806	0.001	-14.7631	0.250007	0.441558	d__Bacteria;p__Actinobacteria;c__Actinomycetia;o__Acidothermales;f__Acidothermaceae;g__Acidothermus;s__Acidothermus cellulolyticus
ASV11523	0	0	3	0	0	0	0	0	0	0	0	0	126.54	0	0	0	0	0	0	0	25.308	0.001	-14.6273	0.500005	0.551321	d__Bacteria;p__Planctomycetes;c__Planctomycetia;o__Gemmatales;f__Gemmataceae;g__Fimbriiglobus;s__Fimbriiglobus ruber
ASV11524	0	0	3	0	0	0	0	0	0	0	0	0	126.54	0	0	0	0	0	0	0	25.308	0.001	-14.6273	0.500005	0.551321	d__Bacteria;p__Proteobacteria;c__Gammaproteobacteria;o__Legionellales;f__Coxiellaceae;g__Coxiella;s__uncultured bacterium
ASV11525	0	0	0	0	0	0	0	0	0	3	0	0	0	0	0	0	0	0	0	134.21	0.001	26.842	14.7122	0.500005	0.551321	d__Bacteria;p__Bacteroidetes;c__Chitinophagia;o__Chitinophagales;f__Chitinophagaceae;g__Chitinophaga;s__Chitinophaga arvensicola
ASV11526	0	3	0	0	0	0	0	0	0	0	0	135.26	0	0	0	0	0	0	0	0	27.052	0.001	-14.7234	0.250007	0.441558	d__Bacteria;p__Acidobacteria;c__Vicinamibacteria;o__norank;f__Vicinamibacteraceae;g__Luteitalea;s__Luteitalea pratensis
ASV11527	0	0	0	0	3	0	0	0	0	0	0	0	0	0	143.23	0	0	0	0	0	28.646	0.001	-14.806	0.0312547	0.205376	d__Bacteria;p__Acidobacteria;c__Acidobacteriia;o__Acidobacteriales;f__Acidobacteriaceae;g__Occallatibacter;s__uncultured Acidobacteria bacterium
ASV11528	0	3	0	0	0	0	0	0	0	0	0	135.26	0	0	0	0	0	0	0	0	27.052	0.001	-14.7234	0.250007	0.441558	d__Bacteria;p__Acidobacteria;c__Acidobacteriia;o__Acidobacteriales;f__Acidobacteriaceae;g__Silvibacterium;s__Silvibacterium bohemicum
ASV11529	3	0	0	0	0	0	0	0	0	0	132.89	0	0	0	0	0	0	0	0	0	26.578	0.001	-14.6979	0.250007	0.441558	d__Bacteria;p__Proteobacteria;c__Alphaproteobacteria;o__Sphingomonadales;f__Sphingomonadaceae;g__Novosphingobium;s__Novosphingobium sp004364785
ASV1153	0	0	0	0	0	0	16	0	0	0	0	0	0	0	0	0	676.13	0	0	0	0.001	135.226	17.045	3.05542e-05	0.00121578	d__Bacteria;p__Cyanobacteria;c__norank;o__Synechococcales;f__Prochlorotrichaceae;g__Nodosilinea;s__Nodosilinea sp003017855
ASV11530	0	0	0	3	0	0	0	0	0	0	0	0	0	139.03	0	0	0	0	0	0	27.806	0.001	-14.7631	0.250007	0.441558	d__Bacteria;p__Acidobacteria;c__Acidobacteriia;o__Acidobacteriales;f__Acidobacteriaceae;g__Occallatibacter;s__uncultured bacterium
ASV11531	0	0	0	3	0	0	0	0	0	0	0	0	0	139.03	0	0	0	0	0	0	27.806	0.001	-14.7631	0.250007	0.441558	d__Bacteria;p__Proteobacteria;c__Alphaproteobacteria;o__Rhodospirillales;f__Acetobacteraceae;g__Acidicaldus;s__uncultured bacterium
ASV11532	3	0	0	0	0	0	0	0	0	0	132.89	0	0	0	0	0	0	0	0	0	26.578	0.001	-14.6979	0.250007	0.441558	d__Bacteria;p__Acidobacteria;c__Acidobacteriia;o__Acidobacteriales;f__Acidobacteriaceae;g__Candidatus Koribacter;s__uncultured Acidobacteria bacterium
ASV11533	0	3	0	0	0	0	0	0	0	0	0	135.26	0	0	0	0	0	0	0	0	27.052	0.001	-14.7234	0.250007	0.441558	Unclassified
ASV11534	0	3	0	0	0	0	0	0	0	0	0	135.26	0	0	0	0	0	0	0	0	27.052	0.001	-14.7234	0.250007	0.441558	d__Bacteria;p__Actinobacteria;c__Actinomycetia;o__Micrococcales;f__Micrococcaceae;g__Paenarthrobacter;s__Paenarthrobacter sp000526335
ASV11535	0	0	0	0	0	0	0	0	3	0	0	0	0	0	0	0	0	0	139.08	0	0.001	27.816	14.7636	0.125007	0.349364	d__Bacteria;p__Bacteroidetes;c__Chitinophagia;o__Chitinophagales;f__Chitinophagaceae;g__Ferruginibacter;s__uncultured bacterium
ASV11536	0	0	0	0	0	0	0	0	3	0	0	0	0	0	0	0	0	0	139.08	0	0.001	27.816	14.7636	0.125007	0.349364	d__Bacteria;p__Acidobacteria;c__Acidobacteriia;o__Acidobacteriales;f__Acidobacteriaceae;g__Silvibacterium;s__Silvibacterium bohemicum
ASV11537	0	0	0	0	0	0	0	0	3	0	0	0	0	0	0	0	0	0	139.08	0	0.001	27.816	14.7636	0.125007	0.349364	d__Bacteria;p__Planctomycetes;c__Planctomycetia;o__Gemmatales;f__Gemmataceae;g__Gemmata;s__Gemmata sp013822345
ASV11538	0	0	0	0	3	0	0	0	0	0	0	0	0	0	143.23	0	0	0	0	0	28.646	0.001	-14.806	0.0312547	0.205376	d__Bacteria;p__Proteobacteria;c__Gammaproteobacteria;o__norank;f__norank;g__Acidibacter;s__uncultured bacterium
ASV11539	0	0	0	0	0	0	0	0	3	0	0	0	0	0	0	0	0	0	139.08	0	0.001	27.816	14.7636	0.125007	0.349364	d__Bacteria;p__Proteobacteria;c__Gammaproteobacteria;o__Xanthomonadales;f__Xanthomonadaceae;g__Arenimonas;s__Arenimonas oryziterrae
ASV1154	0	0	16	0	0	0	0	0	0	0	0	0	674.88	0	0	0	0	0	0	0	134.976	0.001	-17.0423	0.001954	0.035436	d__Bacteria;p__Proteobacteria;c__Alphaproteobacteria;o__Micropepsales;f__Micropepsaceae;g__Rhizomicrobium;s__Rhizomicrobium sp013149165
ASV11540	0	3	0	0	0	0	0	0	0	0	0	135.26	0	0	0	0	0	0	0	0	27.052	0.001	-14.7234	0.250007	0.441558	d__Bacteria;p__Candidatus Dormibacteraeota;c__norank;o__norank;f__norank;g__Candidatus Dormibacter;s__Dormibacter sp003244185
ASV11541	3	0	0	0	0	0	0	0	0	0	132.89	0	0	0	0	0	0	0	0	0	26.578	0.001	-14.6979	0.250007	0.441558	d__Bacteria;p__Bacteroidetes;c__Chitinophagia;o__Chitinophagales;f__Chitinophagaceae;g__Puia;s__uncultured bacterium
ASV11542	0	0	0	0	0	0	0	0	3	0	0	0	0	0	0	0	0	0	139.08	0	0.001	27.816	14.7636	0.125007	0.349364	d__Bacteria;p__Proteobacteria;c__Alphaproteobacteria;o__Hyphomicrobiales;f__Bradyrhizobiaceae;g__Afipia;s__Afipia broomeae
ASV11543	0	0	0	0	0	0	0	0	3	0	0	0	0	0	0	0	0	0	139.08	0	0.001	27.816	14.7636	0.125007	0.349364	d__Bacteria;p__Planctomycetes;c__Planctomycetia;o__Pirellulales;f__Lacipirellulaceae
ASV11544	0	0	0	0	3	0	0	0	0	0	0	0	0	0	143.23	0	0	0	0	0	28.646	0.001	-14.806	0.0312547	0.205376	d__Bacteria;p__Proteobacteria;c__Betaproteobacteria;o__Burkholderiales;f__Oxalobacteraceae;g__Pseudoduganella;s__Pseudoduganella sp001191005
ASV11545	0	0	0	0	0	0	0	0	0	3	0	0	0	0	0	0	0	0	0	134.21	0.001	26.842	14.7122	0.500005	0.551321	d__Bacteria;p__Planctomycetes;c__Planctomycetia;o__Pirellulales;f__Pirellulaceae;g__Bremerella;s__Bremerella volcania
ASV11546	0	3	0	0	0	0	0	0	0	0	0	135.26	0	0	0	0	0	0	0	0	27.052	0.001	-14.7234	0.250007	0.441558	d__Bacteria;p__Acidobacteria;c__Acidobacteriia;o__Acidobacteriales;f__Acidobacteriaceae;g__Edaphobacter
ASV11547	0	0	0	0	0	0	0	0	3	0	0	0	0	0	0	0	0	0	139.08	0	0.001	27.816	14.7636	0.125007	0.349364	d__Bacteria;p__Acidobacteria;c__Acidobacteriia;o__Acidobacteriales;f__Acidobacteriaceae;g__Candidatus Koribacter;s__uncultured bacterium
ASV11548	0	3	0	0	0	0	0	0	0	0	0	135.26	0	0	0	0	0	0	0	0	27.052	0.001	-14.7234	0.250007	0.441558	d__Bacteria;p__Ignavibacteriae;c__Ignavibacteria;o__Ignavibacteriales;f__Ignavibacteriaceae;g__Ignavibacterium;s__uncultured bacterium
ASV11549	3	0	0	0	0	0	0	0	0	0	132.89	0	0	0	0	0	0	0	0	0	26.578	0.001	-14.6979	0.250007	0.441558	d__Bacteria;p__Verrucomicrobia;c__Spartobacteria;o__Chthoniobacterales;f__Chthoniobacteraceae;g__Chthoniobacter;s__Chthoniobacter flavus
ASV1155	0	0	0	0	0	0	0	0	0	16	0	0	0	0	0	0	0	0	0	715.79	0.001	143.158	17.1272	0.000488604	0.0120038	d__Bacteria;p__Proteobacteria;c__Alphaproteobacteria;o__Hyphomicrobiales;f__Methylocystaceae;g__Methylocystis;s__Methylocystis heyeri
ASV11550	0	0	0	0	3	0	0	0	0	0	0	0	0	0	143.23	0	0	0	0	0	28.646	0.001	-14.806	0.0312547	0.205376	d__Bacteria;p__Proteobacteria;c__Deltaproteobacteria;o__Myxococcales;f__Kofleriaceae;g__Haliangium;s__Haliangium ochraceum
ASV11551	3	0	0	0	0	0	0	0	0	0	132.89	0	0	0	0	0	0	0	0	0	26.578	0.001	-14.6979	0.250007	0.441558	d__Bacteria;p__Planctomycetes;c__Planctomycetia;o__Pirellulales;f__Pirellulaceae;g__Rhodopirellula
ASV11552	0	0	0	0	0	0	3	0	0	0	0	0	0	0	0	0	126.77	0	0	0	0.001	25.354	14.6299	0.250007	0.441558	d__Bacteria;p__Acidobacteria;c__Acidobacteriia;o__Acidobacteriales;f__Acidobacteriaceae;g__Candidatus Koribacter;s__uncultured bacterium
ASV11553	0	0	0	0	3	0	0	0	0	0	0	0	0	0	143.23	0	0	0	0	0	28.646	0.001	-14.806	0.0312547	0.205376	d__Bacteria;p__Proteobacteria;c__Betaproteobacteria;o__Burkholderiales;f__Burkholderiaceae;g__Paraburkholderia;s__Paraburkholderia hospita
ASV11554	0	0	3	0	0	0	0	0	0	0	0	0	126.54	0	0	0	0	0	0	0	25.308	0.001	-14.6273	0.500005	0.551321	d__Bacteria;p__Proteobacteria;c__Betaproteobacteria;o__Burkholderiales;f__Comamonadaceae;g__Variovorax;s__Variovorax gossypii
ASV11555	0	0	0	0	0	0	0	0	3	0	0	0	0	0	0	0	0	0	139.08	0	0.001	27.816	14.7636	0.125007	0.349364	d__Bacteria;p__Planctomycetes;c__Planctomycetia;o__Pirellulales;f__Pirellulaceae;g__Pirellula;s__uncultured bacterium
ASV11556	0	0	0	0	0	0	0	0	3	0	0	0	0	0	0	0	0	0	139.08	0	0.001	27.816	14.7636	0.125007	0.349364	Unclassified
ASV11557	0	0	0	0	0	0	0	0	0	3	0	0	0	0	0	0	0	0	0	134.21	0.001	26.842	14.7122	0.500005	0.551321	Unclassified
ASV11558	0	0	0	0	0	0	0	0	3	0	0	0	0	0	0	0	0	0	139.08	0	0.001	27.816	14.7636	0.125007	0.349364	d__Bacteria;p__Verrucomicrobia;c__Verrucomicrobiae;o__Verrucomicrobiales;f__Verrucomicrobia subdivision 3;g__Pedosphaera;s__uncultured Verrucomicrobia bacterium
ASV11559	0	0	0	0	0	0	3	0	0	0	0	0	0	0	0	0	126.77	0	0	0	0.001	25.354	14.6299	0.250007	0.441558	d__Bacteria;p__Proteobacteria;c__Alphaproteobacteria;o__Micropepsales;f__Micropepsaceae;g__Rhizomicrobium;s__Rhizomicrobium sp013149165
ASV1156	0	0	0	16	0	0	0	0	0	0	0	0	0	741.5	0	0	0	0	0	0	148.3	0.001	-17.1782	1.52796e-05	0.000680211	d__Bacteria;p__Bacteroidetes;c__Chitinophagia;o__Chitinophagales;f__Chitinophagaceae;g__Puia;s__uncultured bacterium
ASV11560	0	0	0	0	0	0	0	0	3	0	0	0	0	0	0	0	0	0	139.08	0	0.001	27.816	14.7636	0.125007	0.349364	d__Bacteria;p__Bacteroidetes;c__Sphingobacteriia;o__Sphingobacteriales;f__Sphingobacteriaceae
ASV11561	3	0	0	0	0	0	0	0	0	0	132.89	0	0	0	0	0	0	0	0	0	26.578	0.001	-14.6979	0.250007	0.441558	d__Bacteria;p__Gemmatimonadetes;c__Gemmatimonadetes;o__Gemmatimonadales;f__Gemmatimonadaceae;g__Gemmatirosa;s__Gemmatirosa kalamazoonesis
ASV11562	0	0	0	0	0	0	0	0	0	3	0	0	0	0	0	0	0	0	0	134.21	0.001	26.842	14.7122	0.500005	0.551321	d__Bacteria;p__Proteobacteria;c__Alphaproteobacteria;o__Hyphomicrobiales;f__Hyphomicrobiaceae;g__Rhodoplanes;s__Rhodoplanes serenus
ASV11563	0	0	0	0	0	0	0	0	3	0	0	0	0	0	0	0	0	0	139.08	0	0.001	27.816	14.7636	0.125007	0.349364	d__Bacteria;p__Acidobacteria;c__Vicinamibacteria;o__norank;f__Vicinamibacteraceae;g__Luteitalea;s__Luteitalea pratensis
ASV11564	0	0	0	0	0	0	0	0	3	0	0	0	0	0	0	0	0	0	139.08	0	0.001	27.816	14.7636	0.125007	0.349364	d__Bacteria;p__Proteobacteria;c__Deltaproteobacteria;o__Myxococcales;f__Kofleriaceae;g__Haliangium;s__Haliangium ochraceum
ASV11565	0	0	3	0	0	0	0	0	0	0	0	0	126.54	0	0	0	0	0	0	0	25.308	0.001	-14.6273	0.500005	0.551321	d__Bacteria;p__Verrucomicrobia;c__Verrucomicrobiae;o__Verrucomicrobiales;f__Verrucomicrobia subdivision 3;g__Pedosphaera;s__uncultured bacterium
ASV11566	0	0	3	0	0	0	0	0	0	0	0	0	126.54	0	0	0	0	0	0	0	25.308	0.001	-14.6273	0.500005	0.551321	d__Bacteria;p__Proteobacteria;c__Gammaproteobacteria;o__norank;f__norank;g__Acidibacter;s__uncultured bacterium
ASV11567	0	0	0	0	3	0	0	0	0	0	0	0	0	0	143.23	0	0	0	0	0	28.646	0.001	-14.806	0.0312547	0.205376	d__Bacteria;p__Armatimonadetes;c__Armatimonadia;o__Armatimonadales;f__Armatimonadaceae;g__Armatimonas;s__uncultured bacterium
ASV11568	0	0	0	0	0	3	0	0	0	0	0	0	0	0	0	166.43	0	0	0	0	0.001	33.286	15.0226	0.125007	0.349364	d__Bacteria;p__Proteobacteria;c__Oligoflexia;o__Oligoflexales;f__Oligoflexaceae;g__Oligoflexus;s__uncultured bacterium
ASV11569	0	0	3	0	0	0	0	0	0	0	0	0	126.54	0	0	0	0	0	0	0	25.308	0.001	-14.6273	0.500005	0.551321	d__Bacteria;p__Ignavibacteriae;c__Ignavibacteria;o__Ignavibacteriales;f__Ignavibacteriaceae;g__Ignavibacterium;s__uncultured bacterium
ASV1157	0	0	0	0	0	0	16	0	0	0	0	0	0	0	0	0	676.13	0	0	0	0.001	135.226	17.045	3.05542e-05	0.00121578	d__Bacteria;p__Proteobacteria;c__Betaproteobacteria;o__Nitrosomonadales;f__Sterolibacteriaceae;g__Methyloversatilis;s__Methyloversatilis discipulorum
ASV11570	0	0	0	0	0	0	0	0	3	0	0	0	0	0	0	0	0	0	139.08	0	0.001	27.816	14.7636	0.125007	0.349364	d__Bacteria;p__Acidobacteria;c__Acidobacteriia;o__Bryobacterales;f__Solibacteraceae;g__Candidatus Solibacter;s__Solibacter usitatus
ASV11571	0	0	0	0	0	0	3	0	0	0	0	0	0	0	0	0	126.77	0	0	0	0.001	25.354	14.6299	0.250007	0.441558	Unclassified
ASV11572	0	0	0	0	0	0	3	0	0	0	0	0	0	0	0	0	126.77	0	0	0	0.001	25.354	14.6299	0.250007	0.441558	d__Bacteria;p__Proteobacteria;c__Betaproteobacteria;o__Burkholderiales;f__Oxalobacteraceae;g__Noviherbaspirillum;s__Noviherbaspirillum sp003590875
ASV11573	0	0	0	3	0	0	0	0	0	0	0	0	0	139.03	0	0	0	0	0	0	27.806	0.001	-14.7631	0.250007	0.441558	d__Bacteria;p__Verrucomicrobia;c__Verrucomicrobiae;o__Verrucomicrobiales;f__Verrucomicrobia subdivision 3;g__Pedosphaera;s__uncultured bacterium
ASV11574	3	0	0	0	0	0	0	0	0	0	132.89	0	0	0	0	0	0	0	0	0	26.578	0.001	-14.6979	0.250007	0.441558	d__Bacteria;p__Proteobacteria;c__Betaproteobacteria;o__Rhodocyclales;f__Zoogloeaceae;g__Thauera;s__Thauera aminoaromatica
ASV11575	0	0	0	0	0	0	0	0	3	0	0	0	0	0	0	0	0	0	139.08	0	0.001	27.816	14.7636	0.125007	0.349364	d__Bacteria;p__Proteobacteria;c__Alphaproteobacteria;o__Hyphomicrobiales;f__Phyllobacteriaceae;g__Mesorhizobium;s__Mesorhizobium sp002294945
ASV11576	0	0	0	0	0	0	0	0	3	0	0	0	0	0	0	0	0	0	139.08	0	0.001	27.816	14.7636	0.125007	0.349364	d__Bacteria;p__Candidatus Dormibacteraeota;c__norank;o__norank;f__norank;g__Candidatus Dormibacter;s__Dormibacter sp003244185
ASV11577	0	0	0	0	0	3	0	0	0	0	0	0	0	0	0	166.43	0	0	0	0	0.001	33.286	15.0226	0.125007	0.349364	d__Bacteria;p__Firmicutes;c__Clostridia;o__Eubacteriales;f__Peptococcaceae;g__Desulfosporosinus;s__Desulfosporosinus orientis
ASV11578	3	0	0	0	0	0	0	0	0	0	132.89	0	0	0	0	0	0	0	0	0	26.578	0.001	-14.6979	0.250007	0.441558	d__Bacteria;p__Nitrospirae;c__Nitrospira;o__Nitrospirales;f__Nitrospiraceae;g__Candidatus Manganitrophus;s__Manganitrophus noduliformans
ASV11579	0	0	0	0	0	3	0	0	0	0	0	0	0	0	0	166.43	0	0	0	0	0.001	33.286	15.0226	0.125007	0.349364	d__Bacteria;p__Proteobacteria;c__Deltaproteobacteria;o__Myxococcales;f__Polyangiaceae;g__Sorangium;s__Sorangium cellulosum_E
ASV1158	0	0	0	0	0	0	0	0	0	16	0	0	0	0	0	0	0	0	0	715.79	0.001	143.158	17.1272	0.000488604	0.0120038	d__Bacteria;p__Proteobacteria;c__Betaproteobacteria;o__Burkholderiales;f__Burkholderiaceae;g__Caballeronia;s__Caballeronia cordobensis
ASV11580	0	0	0	0	3	0	0	0	0	0	0	0	0	0	143.23	0	0	0	0	0	28.646	0.001	-14.806	0.0312547	0.205376	d__Bacteria;p__Acidobacteria;c__Acidobacteriia;o__Acidobacteriales;f__Acidobacteriaceae;g__Edaphobacter
ASV11581	0	0	0	0	0	0	3	0	0	0	0	0	0	0	0	0	126.77	0	0	0	0.001	25.354	14.6299	0.250007	0.441558	d__Bacteria;p__Firmicutes;c__Clostridia;o__Eubacteriales;f__Clostridiaceae;g__Hathewaya;s__Clostridiaceae bacterium 14S0207
ASV11582	0	0	0	0	0	0	0	0	3	0	0	0	0	0	0	0	0	0	139.08	0	0.001	27.816	14.7636	0.125007	0.349364	d__Bacteria;p__Proteobacteria;c__Alphaproteobacteria;o__Micropepsales;f__Micropepsaceae;g__Micropepsis;s__uncultured bacterium
ASV11583	0	0	0	0	0	0	3	0	0	0	0	0	0	0	0	0	126.77	0	0	0	0.001	25.354	14.6299	0.250007	0.441558	d__Bacteria;p__Proteobacteria;c__Alphaproteobacteria;o__Hyphomicrobiales;f__Bradyrhizobiaceae;g__Bradyrhizobium;s__Bradyrhizobium canariense
ASV11584	0	0	0	0	0	0	3	0	0	0	0	0	0	0	0	0	126.77	0	0	0	0.001	25.354	14.6299	0.250007	0.441558	d__Bacteria;p__Firmicutes;c__Negativicutes;o__Selenomonadales;f__Sporomusaceae;g__Pelosinus;s__Pelosinus sp000725345
ASV11585	0	0	0	0	3	0	0	0	0	0	0	0	0	0	143.23	0	0	0	0	0	28.646	0.001	-14.806	0.0312547	0.205376	d__Bacteria;p__Proteobacteria;c__Alphaproteobacteria;o__Hyphomicrobiales;f__Xanthobacteraceae;g__Pseudolabrys;s__uncultured bacterium
ASV11586	0	3	0	0	0	0	0	0	0	0	0	135.26	0	0	0	0	0	0	0	0	27.052	0.001	-14.7234	0.250007	0.441558	Unclassified
ASV11587	0	0	0	0	0	0	0	0	3	0	0	0	0	0	0	0	0	0	139.08	0	0.001	27.816	14.7636	0.125007	0.349364	d__Bacteria;p__Actinobacteria;c__Rubrobacteria;o__Gaiellales;f__Gaiellaceae;g__Gaiella;s__uncultured bacterium
ASV11588	0	0	0	0	0	0	3	0	0	0	0	0	0	0	0	0	126.77	0	0	0	0.001	25.354	14.6299	0.250007	0.441558	d__Bacteria;p__Proteobacteria;c__Deltaproteobacteria;o__Myxococcales;f__Labilitrichaceae;g__Labilithrix;s__Labilithrix luteola
ASV11589	3	0	0	0	0	0	0	0	0	0	132.89	0	0	0	0	0	0	0	0	0	26.578	0.001	-14.6979	0.250007	0.441558	d__Bacteria;p__Proteobacteria;c__Alphaproteobacteria;o__Hyphomicrobiales;f__Hyphomicrobiaceae;g__Hyphomicrobium;s__Hyphomicrobium sp900117455
ASV1159	0	0	0	0	0	16	0	0	0	0	0	0	0	0	0	887.61	0	0	0	0	0.001	177.522	17.4376	3.82122e-06	0.000205887	d__Bacteria;p__Acidobacteria;c__Blastocatellia;o__Blastocatellales;f__Blastocatellaceae;g__Stenotrophobacter;s__uncultured Acidobacteria bacterium
ASV11590	0	0	0	0	3	0	0	0	0	0	0	0	0	0	143.23	0	0	0	0	0	28.646	0.001	-14.806	0.0312547	0.205376	d__Bacteria;p__Proteobacteria;c__Alphaproteobacteria;o__Rhodospirillales;f__Acetobacteraceae;g__Acidicaldus;s__uncultured bacterium
ASV11591	0	0	0	0	0	0	0	0	3	0	0	0	0	0	0	0	0	0	139.08	0	0.001	27.816	14.7636	0.125007	0.349364	d__Bacteria;p__Planctomycetes;c__Phycisphaerae;o__Sedimentisphaerales;f__Anaerohalosphaeraceae;g__Anaerohalosphaera;s__Anaerohalosphaera lusitana
ASV11592	0	3	0	0	0	0	0	0	0	0	0	135.26	0	0	0	0	0	0	0	0	27.052	0.001	-14.7234	0.250007	0.441558	d__Bacteria;p__Bacteroidetes;c__Chitinophagia;o__Chitinophagales;f__Chitinophagaceae;g__Puia;s__uncultured bacterium
ASV11593	0	0	0	0	0	3	0	0	0	0	0	0	0	0	0	166.43	0	0	0	0	0.001	33.286	15.0226	0.125007	0.349364	d__Bacteria;p__Proteobacteria;c__Deltaproteobacteria;o__Desulfuromonadales;f__Geobacteraceae;g__Geomonas;s__Geomonas pelophila
ASV11594	3	0	0	0	0	0	0	0	0	0	132.89	0	0	0	0	0	0	0	0	0	26.578	0.001	-14.6979	0.250007	0.441558	d__Bacteria;p__Proteobacteria;c__Betaproteobacteria;o__Burkholderiales;f__Oxalobacteraceae;g__Janthinobacterium;s__Janthinobacterium sp002250505
ASV11595	0	0	0	0	0	0	0	0	3	0	0	0	0	0	0	0	0	0	139.08	0	0.001	27.816	14.7636	0.125007	0.349364	d__Bacteria;p__Proteobacteria;c__Betaproteobacteria;o__Burkholderiales;f__Comamonadaceae;g__Variovorax;s__Variovorax sp014192585
ASV11596	0	0	0	0	3	0	0	0	0	0	0	0	0	0	143.23	0	0	0	0	0	28.646	0.001	-14.806	0.0312547	0.205376	d__Bacteria;p__Verrucomicrobia;c__Verrucomicrobiae;o__Verrucomicrobiales;f__Verrucomicrobia subdivision 3;g__Pedosphaera;s__uncultured bacterium
ASV11597	3	0	0	0	0	0	0	0	0	0	132.89	0	0	0	0	0	0	0	0	0	26.578	0.001	-14.6979	0.250007	0.441558	d__Bacteria;p__Proteobacteria;c__Alphaproteobacteria;o__Rhodospirillales;f__Stellaceae;g__Stella;s__Stella sp006738865
ASV11598	0	0	0	0	0	0	3	0	0	0	0	0	0	0	0	0	126.77	0	0	0	0.001	25.354	14.6299	0.250007	0.441558	d__Bacteria;p__Bacteroidetes;c__Flavobacteriia;o__Flavobacteriales;f__Flavobacteriaceae;g__Flavobacterium;s__uncultured bacterium
ASV11599	3	0	0	0	0	0	0	0	0	0	132.89	0	0	0	0	0	0	0	0	0	26.578	0.001	-14.6979	0.250007	0.441558	d__Bacteria;p__Verrucomicrobia;c__Verrucomicrobiae;o__Verrucomicrobiales;f__Verrucomicrobia subdivision 3;g__Pedosphaera;s__Pedosphaera parvula
ASV116	0	0	0	71	0	0	0	0	0	0	0	0	0	3290.39	0	0	0	0	0	0	658.078	0.001	-19.3279	2.72344e-23	1.66781e-20	d__Bacteria;p__Proteobacteria;c__Gammaproteobacteria;o__norank;f__norank;g__Acidibacter;s__uncultured gamma proteobacterium
ASV1160	0	0	16	0	0	0	0	0	0	0	0	0	674.88	0	0	0	0	0	0	0	134.976	0.001	-17.0423	0.001954	0.035436	d__Bacteria;p__Bacteroidetes;c__Chitinophagia;o__Chitinophagales;f__Chitinophagaceae;g__Puia;s__uncultured bacterium
ASV11600	0	0	0	0	0	0	3	0	0	0	0	0	0	0	0	0	126.77	0	0	0	0.001	25.354	14.6299	0.250007	0.441558	d__Bacteria;p__Proteobacteria;c__Deltaproteobacteria;o__Myxococcales;f__Labilitrichaceae;g__Labilithrix;s__Labilithrix luteola
ASV11601	0	0	0	0	3	0	0	0	0	0	0	0	0	0	143.23	0	0	0	0	0	28.646	0.001	-14.806	0.0312547	0.205376	d__Bacteria;p__Planctomycetes;c__Phycisphaerae;o__Phycisphaerales;f__Phycisphaeraceae;g__Algisphaera
ASV11602	0	0	0	0	0	0	0	0	3	0	0	0	0	0	0	0	0	0	139.08	0	0.001	27.816	14.7636	0.125007	0.349364	d__Bacteria;p__Firmicutes;c__Negativicutes;o__Selenomonadales;f__Sporomusaceae;g__Sporomusa;s__Sporomusa sphaeroides
ASV11603	0	0	0	0	3	0	0	0	0	0	0	0	0	0	143.23	0	0	0	0	0	28.646	0.001	-14.806	0.0312547	0.205376	d__Bacteria;p__Proteobacteria;c__Alphaproteobacteria;o__Rhodospirillales;f__Rhodospirillaceae;g__Inquilinus
ASV11604	0	0	0	0	0	0	0	0	3	0	0	0	0	0	0	0	0	0	139.08	0	0.001	27.816	14.7636	0.125007	0.349364	d__Bacteria;p__Verrucomicrobia;c__Verrucomicrobiae;o__Verrucomicrobiales;f__Verrucomicrobia subdivision 3;g__Pedosphaera
ASV11605	0	0	0	0	3	0	0	0	0	0	0	0	0	0	143.23	0	0	0	0	0	28.646	0.001	-14.806	0.0312547	0.205376	Unclassified
ASV11606	0	0	0	0	0	0	3	0	0	0	0	0	0	0	0	0	126.77	0	0	0	0.001	25.354	14.6299	0.250007	0.441558	d__Bacteria;p__Chloroflexi;c__Ktedonobacteria;o__Ktedonobacterales;f__Dictyobacteraceae;g__Dictyobacter;s__Dictyobacter aurantiacus
ASV11607	0	0	0	0	3	0	0	0	0	0	0	0	0	0	143.23	0	0	0	0	0	28.646	0.001	-14.806	0.0312547	0.205376	d__Bacteria;p__Proteobacteria;c__Gammaproteobacteria;o__norank;f__norank;g__Acidibacter;s__uncultured bacterium
ASV11608	3	0	0	0	0	0	0	0	0	0	132.89	0	0	0	0	0	0	0	0	0	26.578	0.001	-14.6979	0.250007	0.441558	d__Bacteria;p__Proteobacteria;c__Deltaproteobacteria;o__Desulfuromonadales;f__Geobacteraceae;g__Geobacter;s__Geobacter pickeringii
ASV11609	3	0	0	0	0	0	0	0	0	0	132.89	0	0	0	0	0	0	0	0	0	26.578	0.001	-14.6979	0.250007	0.441558	d__Bacteria;p__Acidobacteria;c__Acidobacteriia;o__Acidobacteriales;f__Acidobacteriaceae;g__Candidatus Koribacter;s__uncultured bacterium
ASV1161	0	16	0	0	0	0	0	0	0	0	0	721.4	0	0	0	0	0	0	0	0	144.28	0.001	-17.1385	1.52796e-05	0.000680211	d__Bacteria;p__Armatimonadetes;c__Armatimonadia;o__Capsulimonadales;f__Capsulimonadaceae;g__Capsulimonas;s__Capsulimonas corticalis
ASV11610	0	0	0	3	0	0	0	0	0	0	0	0	0	139.03	0	0	0	0	0	0	27.806	0.001	-14.7631	0.250007	0.441558	d__Bacteria;p__Acidobacteria;c__Acidobacteriia;o__Acidobacteriales;f__Acidobacteriaceae;g__Candidatus Koribacter;s__uncultured bacterium
ASV11611	0	0	0	0	0	0	3	0	0	0	0	0	0	0	0	0	126.77	0	0	0	0.001	25.354	14.6299	0.250007	0.441558	d__Bacteria;p__Candidatus Peregrinibacteria;c__Candidatus Peribacteria;o__Candidatus Peribacterales;f__norank;g__Candidatus Peribacter;s__Peribacter riflensis
ASV11612	0	0	0	0	0	0	0	0	3	0	0	0	0	0	0	0	0	0	139.08	0	0.001	27.816	14.7636	0.125007	0.349364	d__Bacteria;p__Bacteroidetes;c__Chitinophagia;o__Chitinophagales;f__Chitinophagaceae;g__Flavisolibacter;s__Flavisolibacter sp013327885
ASV11613	3	0	0	0	0	0	0	0	0	0	132.89	0	0	0	0	0	0	0	0	0	26.578	0.001	-14.6979	0.250007	0.441558	d__Bacteria;p__Proteobacteria;c__Betaproteobacteria;o__Burkholderiales;f__norank;g__Methylibium;s__Methylibium petroleiphilum
ASV11614	0	0	0	0	0	0	0	0	3	0	0	0	0	0	0	0	0	0	139.08	0	0.001	27.816	14.7636	0.125007	0.349364	d__Bacteria;p__Proteobacteria;c__Betaproteobacteria;o__norank;f__Casimicrobiaceae;g__Casimicrobium;s__Casimicrobium huifangae
ASV11615	0	3	0	0	0	0	0	0	0	0	0	135.26	0	0	0	0	0	0	0	0	27.052	0.001	-14.7234	0.250007	0.441558	d__Bacteria;p__Proteobacteria;c__Alphaproteobacteria;o__Rhodospirillales;f__Rhodospirillaceae;g__Aliidongia;s__Aliidongia dinghuensis
ASV11616	3	0	0	0	0	0	0	0	0	0	132.89	0	0	0	0	0	0	0	0	0	26.578	0.001	-14.6979	0.250007	0.441558	Unclassified
ASV11617	0	0	0	0	3	0	0	0	0	0	0	0	0	0	143.23	0	0	0	0	0	28.646	0.001	-14.806	0.0312547	0.205376	d__Bacteria;p__Planctomycetes;c__Planctomycetia;o__Isosphaerales;f__Isosphaeraceae;g__Aquisphaera;s__Aquisphaera giovannonii
ASV11618	0	0	0	0	0	0	0	0	3	0	0	0	0	0	0	0	0	0	139.08	0	0.001	27.816	14.7636	0.125007	0.349364	d__Bacteria;p__Proteobacteria;c__Alphaproteobacteria;o__Hyphomicrobiales;f__Hyphomicrobiaceae;g__Rhodoplanes;s__Rhodoplanes serenus
ASV11619	3	0	0	0	0	0	0	0	0	0	132.89	0	0	0	0	0	0	0	0	0	26.578	0.001	-14.6979	0.250007	0.441558	d__Bacteria;p__Proteobacteria;c__Alphaproteobacteria;o__Hyphomicrobiales;f__Bradyrhizobiaceae;g__Bradyrhizobium;s__Bradyrhizobium canariense_A
ASV1162	0	0	0	0	16	0	0	0	0	0	0	0	0	0	763.87	0	0	0	0	0	152.774	0.001	-17.221	7.47879e-09	8.27213e-07	d__Bacteria;p__Cyanobacteria;c__norank;o__Nostocales;f__Aphanizomenonaceae;g__Dolichospermum;s__Dolichospermum flosaquae
ASV11620	0	0	0	0	0	0	0	0	3	0	0	0	0	0	0	0	0	0	139.08	0	0.001	27.816	14.7636	0.125007	0.349364	Unclassified
ASV11621	0	3	0	0	0	0	0	0	0	0	0	135.26	0	0	0	0	0	0	0	0	27.052	0.001	-14.7234	0.250007	0.441558	d__Bacteria;p__Planctomycetes;c__Planctomycetia;o__Isosphaerales;f__Isosphaeraceae;g__Aquisphaera;s__Aquisphaera giovannonii
ASV11622	0	0	0	0	0	0	0	0	0	3	0	0	0	0	0	0	0	0	0	134.21	0.001	26.842	14.7122	0.500005	0.551321	d__Bacteria;p__Planctomycetes;c__Planctomycetia;o__Gemmatales;f__Gemmataceae;g__Fimbriiglobus;s__Fimbriiglobus ruber
ASV11623	0	0	0	0	0	3	0	0	0	0	0	0	0	0	0	166.43	0	0	0	0	0.001	33.286	15.0226	0.125007	0.349364	d__Bacteria;p__Bacteroidetes;c__Chitinophagia;o__Chitinophagales;f__Chitinophagaceae;g__Aurantisolimonas;s__metagenome
ASV11624	3	0	0	0	0	0	0	0	0	0	132.89	0	0	0	0	0	0	0	0	0	26.578	0.001	-14.6979	0.250007	0.441558	d__Bacteria;p__Verrucomicrobia;c__Verrucomicrobiae;o__Verrucomicrobiales;f__Verrucomicrobia subdivision 3;g__Pedosphaera;s__uncultured Verrucomicrobia bacterium
ASV11625	0	0	3	0	0	0	0	0	0	0	0	0	126.54	0	0	0	0	0	0	0	25.308	0.001	-14.6273	0.500005	0.551321	d__Bacteria;p__Bacteroidetes;c__Sphingobacteriia;o__Sphingobacteriales;f__Sphingobacteriaceae;g__Mucilaginibacter;s__Mucilaginibacter gossypii
ASV11626	0	0	0	0	0	0	0	0	3	0	0	0	0	0	0	0	0	0	139.08	0	0.001	27.816	14.7636	0.125007	0.349364	d__Bacteria;p__Bacteroidetes;c__Flavobacteriia;o__Flavobacteriales;f__Flavobacteriaceae;g__Flavobacterium;s__Flavobacterium succinicans_A
ASV11627	0	0	0	0	0	0	3	0	0	0	0	0	0	0	0	0	126.77	0	0	0	0.001	25.354	14.6299	0.250007	0.441558	d__Bacteria;p__Planctomycetes;c__Planctomycetia;o__Isosphaerales;f__Isosphaeraceae;g__Aquisphaera;s__Aquisphaera giovannonii
ASV11628	0	0	0	3	0	0	0	0	0	0	0	0	0	139.03	0	0	0	0	0	0	27.806	0.001	-14.7631	0.250007	0.441558	d__Bacteria;p__Proteobacteria;c__Betaproteobacteria;o__Burkholderiales;f__Burkholderiaceae;g__Paraburkholderia;s__Paraburkholderia sp003610295
ASV11629	0	0	0	0	0	3	0	0	0	0	0	0	0	0	0	166.43	0	0	0	0	0.001	33.286	15.0226	0.125007	0.349364	d__Bacteria;p__Planctomycetes;c__Planctomycetia;o__Planctomycetales;f__Planctomycetaceae;g__Gimesia;s__Gimesia sp007748135
ASV1163	0	0	0	0	0	0	0	0	16	0	0	0	0	0	0	0	0	0	741.74	0	0.001	148.348	17.1786	3.82122e-06	0.000205887	d__Bacteria;p__Candidatus Dormibacteraeota;c__norank;o__norank;f__norank;g__Candidatus Dormibacter;s__Dormibacter sp003244185
ASV11630	0	0	0	3	0	0	0	0	0	0	0	0	0	139.03	0	0	0	0	0	0	27.806	0.001	-14.7631	0.250007	0.441558	d__Bacteria;p__Proteobacteria;c__Alphaproteobacteria;o__Rhodospirillales;f__Stellaceae;g__Stella;s__Stella sp006738865
ASV11631	0	3	0	0	0	0	0	0	0	0	0	135.26	0	0	0	0	0	0	0	0	27.052	0.001	-14.7234	0.250007	0.441558	d__Bacteria;p__Proteobacteria;c__Gammaproteobacteria;o__Chromatiales;f__Woeseiaceae;g__Woeseia
[truncated: 48,400 more rows]

## Sheet: Table S2
Table S2 Differential fungi enriched in JH1 and JH2 cultivars
[truncated: 1,943 more rows]

## Sheet: Table S3
Table S3 Raw data of metabolites in JH1 and JH2 cultivars
[truncated: 2,191 more rows]

[truncated: 2 more sheets: Table S4, Table S5]
